# Supplementary material for: Crosstalk with keratinocytes causes GNAQ oncogene specificity in melanoma
Source: eLife. 2021 Dec 23;10:e71825. doi: 10.7554/eLife.71825 (PMC8747508; doi:10.7554/eLife.71825)
Supplement: Supplementary file 1. — (a) Genes with FPKM >0.1 in wildtype (WT) and/or GNAQQ209L melanocytes. (b) Differentially expressed genes down-regulated in GNAQQ209L interfollicular epidermis (IFE) melanocytes, sorted by Z_score. (c) Differentially expressed genes up-regulated in GNAQQ209L IFE melanocytes, sorted by Z_score. (d) Genes supporting pathway analysis terms related to cell adhesion, focal adhesion, and the extracellular matrix. (e) Genes supporting pathway analysis terms related to axon guidance, nervous system development, and axon cellular component. [file elife-71825-supp1.xlsx]

## Sheet: Table 1a
gene	locus	WT_FPKM	GNAQ_FPKM	log2(fold_change)	p_value	q_value	significant					Table 1a: Genes with FPKM > 0.1 in WT and/or GNAQ Q209L melanocytes										Reference = GRCm38
Pmel	chr10:128706257-128744056	9943.26	5732.09	-0.794658	0.55215	0.870841	no
Dct	chr14:118012789-118052246	9694.68	7237.86	-0.421629	0.72895	0.940986	no
Mir5133	chr9:62122517-62122594	5876.8	12755	1.11796	0.14875	0.466898	no
Tyrp1	chr4:80834212-80851736	5555.16	4451.55	-0.319522	0.84805	0.972503	no
Ptgds	chr2:25466711-25469749	4196	1196.25	-1.81049	5e-05	0.000658218	yes
Mlana	chr19:29697940-29708306	3742.08	1622.48	-1.20564	5e-05	0.000658218	yes
Eef1a1	chr9:78478453-78481724	2841.05	3127.04	0.138373	0.7091	0.934311	no
Vim	chr2:13574310-13582826	2217.6	2943.88	0.408718	0.2605	0.634323	no
Cd63	chr10:128908918-128912818	2106.41	2113.5	0.00484611	0.9828	0.996578	no
Krt14	chr11:100203161-100207510	1657.2	1654.97	-0.00194367	0.9944	0.998962	no
Lgals1	chr15:78926724-78930465	1596.53	2046.49	0.358211	0.05425	0.235229	no
Fth1	chr19:9980599-9985111	1575.81	1502.42	-0.0688039	0.719	0.936778	no
Rplp1	chr9:61913282-61914510	1572.86	1468.66	-0.0988933	0.49435	0.839975	no
Gstp1	chr19:4035410-4037912	1454.79	1341.38	-0.117094	0.49195	0.838768	no
Slc24a5	chr2:125068126-125123660	1445.5	931.208	-0.634392	0.0129	0.0791208	no
Gpnmb	chr6:49036517-49058182	1425.14	1420.31	-0.00489599	0.99315	0.998962	no
Rps27rt	chr3:90212666-90213648	1419.02	1518.63	0.097873	0.47735	0.829599	no
Ftl1	chr7:45457943-45459886	1371.65	1389.92	0.0190909	0.9204	0.983982	no
Krt10	chr11:99385255-99389364	1321.41	1148.67	-0.202124	0.45595	0.814412	no
Rpl8	chr15:76904070-76906318	1296.77	1282.66	-0.0157849	0.9262	0.984905	no
Krt5	chr15:101707069-101712891	1291.71	1252.98	-0.043911	0.87785	0.977764	no
Actb	chr5:142903117-142906754	1269.7	1800.55	0.50395	0.06865	0.277325	no
Ctsd	chr7:142375915-142387870	1242.86	1492.39	0.263963	0.30785	0.684504	no
Rplp2	chr7:141447649-141451342	1212.83	1175.31	-0.0453315	0.7375	0.943224	no
Mgll	chr6:88724411-88828360	1177.56	761.745	-0.62842	0.06985	0.281167	no
Rpl32	chr6:115774556-115808743	1176.52	1423.16	0.274572	0.06965	0.280544	no
Rps15	chr10:79697304-80369637	1148.66	1271.65	0.14675	0.8935	0.980544	no
Neat1	chr19:5824709-5845480	1144.85	1866.04	0.704827	0.1164	0.398948	no
Tyr	chr7:87427404-87493411	1105.73	658.741	-0.747221	0.01435	0.0859339	no
Lgals7	chr7:28864385-28866284	1096.03	1005.34	-0.124597	0.4055	0.7743	no
Cfl1	chr19:5490454-5494031	1070.16	1375.37	0.36199	0.06615	0.270305	no
Rps14	chr18:60774595-60778546	1060.69	1112.91	0.0693235	0.6364	0.906098	no
Rpl36	chr17:56613394-56614246	1043.91	1064.54	0.0282352	0.8351	0.968872	no
Rps21	chr2:180257378-180258444	1027.23	1021.7	-0.00779636	0.954	0.990876	no
Mt1	chr8:94179088-94180327	1020.03	931.152	-0.131522	0.35175	0.728846	no
Rps9	chr7:3704040-3706897	1019.11	1037.84	0.0262787	0.86305	0.97663	no
Trpm1	chr7:64153834-64269759	1016	513.77	-0.983706	0.00105	0.00978581	yes
Atp1a1	chr3:101576218-101604707	1002.58	1233.11	0.298579	0.40305	0.772497	no
Tpt1	chr14:75845255-75848303	983.132	925.237	-0.0875622	0.58225	0.885997	no
Eef2	chr10:81176630-81182509	969.228	1058.55	0.127177	0.66465	0.914777	no
Anxa2	chr9:69453682-69491785	933.019	1022.23	0.131748	0.49005	0.837945	no
Rpl41	chr10:128548109-128549168	928.954	1017.45	0.131281	0.33695	0.715237	no
Rps12	chr10:23785182-23787209	905.809	894.297	-0.0184526	0.8905	0.979297	no
Gnb2l1	chr11:48800359-48806241	878.431	988.707	0.170614	0.33675	0.715212	no
Rpl4	chr9:64173386-64178562	866.888	908.216	0.0671898	0.7174	0.936664	no
Rpl28	chr7:4792964-4794547	866.881	918.623	0.0836386	0.53595	0.862351	no
Aldoa	chr7:126795233-126800447	860.695	914.39	0.0873072	0.64735	0.910932	no
Rps11	chr7:45122387-45124389	850.952	978.803	0.201941	0.15595	0.480269	no
Rps5	chr7:12922310-12926686	842.926	948.867	0.170801	0.2499	0.619584	no
Rplp0	chr5:115559466-115563729	814.001	862.001	0.0826579	0.64245	0.909137	no
Atp5b	chr10:128083306-128090388	779.216	785.971	0.0124522	0.949	0.990262	no
Lmna	chr3:88481147-88503352	774.317	743.575	-0.058446	0.807	0.964206	no
Apoe	chr7:19696243-19699188	769.756	502.83	-0.614331	0.0001	0.00122911	yes
Rps20	chr4:3834472-3835600	764.03	882.237	0.207538	0.1301	0.428626	no
Tmsb10	chr6:72957346-72958748	760.029	995.738	0.389711	0.00625	0.0439838	yes
Pfn1	chr11:70651846-70654650	744.745	1138.03	0.611719	0.00015	0.00177006	yes
Akr1a1	chr4:116636509-116651674	741.145	640.202	-0.211229	0.21865	0.576186	no
Lgals3	chr14:47373859-47386167	734.584	1542.84	1.07059	5e-05	0.000658218	yes
Mt2	chr8:94172617-94173567	718.717	725.713	0.0139759	0.9175	0.982797	no
B2m	chr2:122120107-122186189	713.392	605.829	-0.235786	0.1112	0.386785	no
S100a6	chr3:90612893-90614414	705.407	940.609	0.415139	0.00515	0.0378073	yes
Rpl7	chr1:16101295-16104433	699.555	699.505	-0.000102039	0.9991	0.999442	no
Rps17	chr7:81342732-81345234	698.812	735.308	0.0734456	0.5836	0.886281	no
Hsp90ab1	chr17:45567777-45573261	683.386	771.963	0.17583	0.42575	0.789552	no
Slc7a5	chr8:121881145-121907686	680.212	427.504	-0.670046	0.00605	0.0428191	yes
Krtdap	chr7:30787904-30791083	658.58	564.72	-0.221822	0.1147	0.394491	no
Cox4i1	chr8:120668224-120674209	657.723	660.286	0.00561118	0.9693	0.994259	no
Krt2	chr15:101810688-101818169	656.057	491.158	-0.417633	0.06275	0.261435	no
Rps4x	chrX:102184942-102188371	653.679	642.136	-0.0257017	0.86445	0.977149	no
Ly6d	chr15:74762055-74763567	636.081	520.697	-0.288767	0.04645	0.210372	no
Rpl13a	chr7:45125562-45128745	634.417	664.219	0.0662278	0.65725	0.91277	no
Krt1	chr15:101845425-101850786	623.839	515.831	-0.274275	0.24895	0.618588	no
Rps8	chr4:117153835-117156132	619.514	653.611	0.0772951	0.58355	0.886281	no
Syngr1	chr15:80091333-80119501	609.621	588.114	-0.0518167	0.7718	0.952238	no
Psap	chr10:60277627-60302600	607.673	599.43	-0.019702	0.9267	0.984905	no
Vat1	chr11:101458747-101466199	605.935	712.533	0.233793	0.30415	0.681661	no
Ctnnb1	chr9:120933399-120960507	603.604	545.864	-0.14506	0.5419	0.865833	no
Rps18	chr17:33951998-33955641	597.175	627.571	0.0716247	0.5982	0.892242	no
Rpl18	chr7:45718070-45720835	591.741	661.078	0.159856	0.2482	0.61759	no
Slc3a2	chr19:8706881-8723369	579.25	450.728	-0.361928	0.0677	0.274829	no
Gnas	chr2:174281236-174346742	571.17	954.909	0.741442	0.0006	0.00608033	yes
S100a1	chr3:90511033-90514330	570.102	301.472	-0.919196	5e-05	0.000658218	yes
Rps2	chr17:24720062-24721927	569.045	588.561	0.0486483	0.74865	0.945135	no
Calm2	chr17:87433400-87446935	562.085	449.045	-0.323928	0.03515	0.171118	no
Rps26	chr10:128624528-128626506	553.035	743.342	0.426657	0.00255	0.0207306	yes
Ppia	chr11:6415869-6419810	549.323	496.714	-0.14524	0.28375	0.661994	no
Rpl7a	chr2:26910806-26913311	547.7	574.829	0.0697484	0.62805	0.904794	no
Cdk2	chr10:128697938-128705051	533.272	404.832	-0.397546	0.02975	0.150373	no
Csrp1	chr1:135729196-135752229	533.093	629.307	0.239376	0.17945	0.519905	no
Rpl13	chr8:123102349-123105242	532.905	542.571	0.0259333	0.851	0.973909	no
Rpl12	chr2:32961711-32964045	532.128	580.851	0.126395	0.35655	0.734154	no
Sqstm1	chr11:50200151-50210820	529.474	606.863	0.196811	0.29325	0.671776	no
Npy	chr6:49822728-49829505	528.485	490.945	-0.106301	0.445	0.805869	no
Fos	chr12:85473900-85477270	527.082	371.242	-0.505667	0.00305	0.0241471	yes
Eif5a	chr11:69916711-69921958	524.267	552.823	0.0765159	0.6339	0.905446	no
Pkm	chr9:59656367-59679375	521.922	891.701	0.772725	0.00085	0.0081231	yes
Ldha	chr7:46845803-46855627	515.963	742.85	0.525801	0.0027	0.0217648	yes
Rps16	chr7:28350688-28352698	511.453	533.554	0.0610304	0.6474	0.910932	no
Atp5g3	chr2:73908446-73911326	499.452	475.83	-0.0699004	0.6121	0.898179	no
Calr	chr8:84842087-84846931	496.342	523.686	0.0773688	0.65605	0.912688	no
Slc25a4	chr8:46207340-46211009	496.146	439.539	-0.174773	0.22965	0.590733	no
Itm2b	chr14:73362231-73385271	494.128	356.845	-0.469586	0.0041	0.0310161	yes
Cyb5a	chr18:84851413-84879863	493.683	304.197	-0.698577	5e-05	0.000658218	yes
Tmsb4x	chrX:167207093-167209218	492.601	967.229	0.97344	5e-05	0.000658218	yes
Cox8a	chr19:7215157-7217616	490.94	498.878	0.0231401	0.86035	0.975613	no
Emp3	chr7:45918022-45921426	484.868	506.67	0.0634557	0.64505	0.909857	no
Dbi	chr1:120113279-120121096	479.667	537.669	0.164684	0.22105	0.579809	no
Sparc	chr11:55394158-55420080	468.702	1022.65	1.12556	5e-05	0.000658218	yes
Fau	chr19:6057887-6059524	465.792	474.344	0.0262484	0.84095	0.969664	no
App	chr16:84954435-85173707	456.674	509.366	0.157537	0.4589	0.816341	no
Rpl9	chr5:65388363-65391431	455.763	448.765	-0.0223247	0.8667	0.977149	no
Anxa1	chr19:20373433-20390671	454.716	763.226	0.747145	5e-05	0.000658218	yes
Prdx1	chr4:116684964-116700000	454.062	397.915	-0.190429	0.2046	0.555535	no
S100a10	chr3:93555116-93564645	451.135	495.876	0.136419	0.3046	0.681808	no
Ednrb	chr14:103814614-103844476	449.474	141.247	-1.67002	5e-05	0.000658218	yes
Atp5a1	chr18:77773767-77782868	447.837	438.761	-0.0295374	0.86785	0.977265	no
Rpl23a	chr11:78180935-78183584	447.446	457.065	0.0306835	0.81885	0.967336	no
Idh2	chr7:80094846-80115350	443.105	241.473	-0.87579	5e-05	0.000658218	yes
Lamp1	chr8:13159134-13175338	439.695	433.085	-0.0218531	0.90175	0.98099	no
Gm12191	chr15:34440505-34443276	438.599	415.392	-0.0784291	0.5873	0.888096	no
Rps10	chr17:27630428-27635242	435.458	468.965	0.106946	0.43105	0.793546	no
Oca2	chr7:56239770-56536517	431.99	401.495	-0.105617	0.59995	0.892377	no
Cox6b1	chr7:30616973-30626151	428.693	442.816	0.0467605	0.7224	0.93816	no
Rpl35	chr2:38998308-39005131	426.987	478.039	0.162937	0.2311	0.592498	no
Rps3	chr7:99477896-99483709	423.33	441.708	0.0613122	0.7088	0.934311	no
Rpl37a	chr1:72711259-72713813	422.72	412.693	-0.0346324	0.79475	0.959977	no
Tagln2	chr1:172500245-172507375	420.55	663.959	0.658817	0.0001	0.00122911	yes
Ptms	chr6:124913674-124917946	418.385	474.407	0.181294	0.21775	0.574537	no
Sat1	chrX:155213125-155216449	418.335	348.137	-0.265006	0.0646	0.266604	no
Atp5k	chr5:108433252-108434378	416.943	412.852	-0.0142231	0.9255	0.984905	no
Rpl10	chrX:74270815-74273135	416.682	466.124	0.161765	0.23465	0.597895	no
Arhgdia	chr11:120577234-120581620	416.138	421.371	0.0180288	0.9223	0.984349	no
Rpl11	chr4:136049947-136053371	416.05	369.983	-0.169298	0.2051	0.555798	no
Rps13	chr7:116331506-116334190	413.461	396.084	-0.0619459	0.6434	0.909137	no
Igsf8	chr1:172312406-172319835	399.071	290.172	-0.45974	0.00595	0.0423285	yes
Actg1	chr11:120345689-120348484	395.743	560.661	0.502566	0.00315	0.0248438	yes
Cd9	chr6:125460265-125494755	394.975	787.651	0.995796	5e-05	0.000658218	yes
Krt16	chr11:100246090-100248902	392.041	421.817	0.105612	0.5993	0.892242	no
Mcoln3	chr3:146121790-146140646	391.356	233.204	-0.746885	5e-05	0.000658218	yes
Rpl35a	chr16:33056452-33060188	386.834	369.163	-0.0674534	0.62265	0.903021	no
Atp6v1b2	chr8:69037707-69113717	386.092	300.425	-0.361939	0.04475	0.204163	no
Rps23	chr13:90923121-90924732	384.256	402.076	0.0653979	0.62525	0.904223	no
Atp5j2	chr5:145183705-145191592	383.681	373.408	-0.0391544	0.7722	0.952414	no
Cox6a1	chr5:115345653-115348955	383.2	430.674	0.168499	0.2095	0.562199	no
Slc25a5	chrX:36795596-36798808	382.668	404.008	0.0782899	0.59	0.888263	no
Mgat4b	chr11:50225334-50235103	378.24	304.561	-0.312573	0.06525	0.268305	no
Kit	chr5:75574986-75656721	375.89	120.253	-1.64423	5e-05	0.000658218	yes
Phlda1	chr10:111506285-111508649	375.559	264.571	-0.505386	0.00155	0.0137049	yes
Txn1	chr4:57943372-57956411	374.431	324.257	-0.207564	0.1391	0.448749	no
Atp5e	chr2:174461074-174464101	370.198	374.844	0.0179916	0.8964	0.98099	no
Sepw1	chr7:15917207-15922371	366.282	315.489	-0.215363	0.1126	0.390561	no
Uba52	chr8:70508265-70510367	365.998	353.176	-0.0514488	0.70555	0.933297	no
Rpl19	chr11:98026709-98030493	365.61	384.981	0.0744795	0.57915	0.885426	no
Syt4	chr18:31437807-31447415	363.289	677.845	0.899837	0.0005	0.00518114	yes
Sepp1	chr15:3270766-3280508	362.289	91.6208	-1.98339	5e-05	0.000658218	yes
Perp	chr10:18845070-18857072	357.096	333.137	-0.100196	0.53535	0.862351	no
Ctsl	chr13:64363213-64370306	356.673	386.361	0.115347	0.47775	0.830061	no
Gsn	chr2:35256358-35307902	355.262	638.944	0.846809	0.0001	0.00122911	yes
Rpl39	chrX:37082519-37085184	354.563	337.483	-0.0712249	0.6139	0.899122	no
Hint1	chr11:54866437-54870496	352.953	446.539	0.33931	0.01085	0.0691437	no
Rps25	chr9:44407713-44418007	349.878	357.918	0.0327782	0.81395	0.966014	no
Sdcbp	chr4:6365679-6396122	348.438	345.781	-0.0110402	0.9493	0.990262	no
Rpl38	chr11:114344525-114757886	347.442	414.599	0.254948	0.6109	0.897831	no
Rpl23	chr11:97777525-97782439	346.402	347.585	0.00491855	0.97135	0.994584	no
Rpl17	chr18:75000476-75003381	346.342	361.683	0.0625273	0.64745	0.910932	no
Ppp1ca	chr19:4192173-4201603	342.288	342.099	-0.000796062	0.99615	0.998962	no
Ubl3	chr5:148504630-148552788	341.951	321.086	-0.0908322	0.60445	0.895102	no
Tubb5	chr17:35833919-35838301	339.776	304.237	-0.159388	0.3344	0.712048	no
Ppib	chr9:66060168-66069731	338.571	357.483	0.0784153	0.5624	0.87731	no
Rpl14	chr9:120571516-120574653	334.524	330.264	-0.0184908	0.8928	0.980232	no
Ndufa4	chr6:11900372-11907446	332.719	328.599	-0.0179733	0.89645	0.98099	no
Gabarap	chr11:69991369-69994949	328.756	321.557	-0.0319463	0.8152	0.966165	no
Ywhae	chr11:75732886-75765841	328.425	320.148	-0.0368245	0.81485	0.966139	no
Tcf25	chr8:123373710-123404174	327.853	313.035	-0.0667257	0.70275	0.932842	no
Rps27a	chr11:29545841-29578352	326.378	304.069	-0.102143	0.44555	0.806277	no
2010107E04Rik	chr12:111961375-111966977	325.414	364.18	0.162375	0.27315	0.652219	no
Bace2	chr16:97356727-97439012	325.234	218.828	-0.571683	0.0023	0.0190475	yes
Slc25a3	chr10:91116577-91123963	324.832	381.728	0.232849	0.10895	0.382239	no
Hnrnpab	chr11:51584756-51606881	324.648	274.621	-0.241431	0.1369	0.442687	no
Cstb	chr10:78425669-78427622	323.102	453.194	0.48814	0.00025	0.00280352	yes
Slc45a2	chr15:11000720-11029233	322.999	340.241	0.07503	0.67555	0.919553	no
Calm4	chr13:3837756-3838671	318.041	268.67	-0.243379	0.07935	0.308503	no
Mif	chr10:75859352-75860250	314.697	328.27	0.0609209	0.6516	0.91188	no
Bsg	chr10:79697304-80369637	313.235	329.574	0.0733583	0.9485	0.990262	no
Rpl34-ps1	chr3:130726826-130730398	312.994	334.972	0.0979062	0.59595	0.891957	no
Krt36	chr11:100102012-100105626	311.874	159.02	-0.971756	5e-05	0.000658218	yes
Ddx5	chr11:106780355-106788494	311.872	280.323	-0.153864	0.3935	0.765478	no
Rpl6	chr5:121204500-121209241	311.753	320.124	0.0382293	0.7838	0.955899	no
Fabp5	chr3:10012584-10016610	310.996	272.213	-0.19216	0.1897	0.534382	no
Shfm1	chr6:6558274-6578658	307.484	332.305	0.111999	0.41275	0.780004	no
Gnai2	chr9:107614137-107635342	306.338	284.013	-0.109168	0.48935	0.837209	no
Ctnnd1	chr2:84600780-84650740	302.763	193.244	-0.647765	0.0013	0.0117625	yes
Uqcrq	chr11:53428947-53430831	295.97	334.476	0.17645	0.19725	0.545359	no
Mc1r	chr8:123407081-123410744	295.837	295.762	-0.000368637	0.99825	0.999394	no
Atp6v0a1	chr11:101009451-101063717	294.377	219.725	-0.421962	0.0204	0.112056	no
Ptma	chr1:86526735-86530698	292.065	281.433	-0.0534988	0.69665	0.928685	no
Qpct	chr17:79051905-79090243	291.956	183.769	-0.667862	5e-05	0.000658218	yes
Sox10	chr15:79154912-79164490	291.555	230.794	-0.337158	0.04235	0.196536	no
H3f3b	chr11:116021960-116024504	291.329	253.708	-0.199479	0.18905	0.5335	no
Gpx1	chr9:108339079-108340344	291.02	330.051	0.181571	0.17695	0.515647	no
Uqcr11	chr10:80402996-80406821	288.936	270.63	-0.0944298	0.5138	0.850328	no
Laptm4a	chr12:8921306-8938741	288.41	302.104	0.0669204	0.6672	0.916016	no
Capns1	chr7:30186941-30195048	288.303	307.221	0.0916904	0.5276	0.858373	no
Uqcrh	chr4:116066964-116075070	285.763	259.522	-0.138961	0.30545	0.682848	no
Dmkn	chr7:30763755-30781066	283.558	275.789	-0.040083	0.82265	0.967427	no
Grn	chr11:102430321-102436809	283.3	753.344	1.41098	5e-05	0.000658218	yes
Uqcr10	chr11:4701967-4704344	282.364	289.907	0.0380354	0.79095	0.959286	no
Tmbim6	chr15:99392946-99410049	280.726	231.06	-0.280894	0.07265	0.288785	no
Rbm3	chrX:8138974-8147963	278.938	257.908	-0.113088	0.4233	0.788492	no
Rps19	chr7:24884713-24889802	277.617	297.84	0.101442	0.45425	0.813075	no
Rps24	chr14:24490680-24496146	274.971	297.067	0.111506	0.4105	0.778602	no
Npm1	chr11:33152497-33163206	274.38	278.993	0.0240558	0.86635	0.977149	no
Cox6c	chr15:35931975-35938246	273.597	268.122	-0.0291641	0.8352	0.968898	no
Rpl3	chr15:80077780-80083406	272.124	276.916	0.0251876	0.8563	0.974882	no
Rpl10a	chr17:28328470-28331033	270.992	283.151	0.0633201	0.6333	0.905446	no
Crip1	chr12:113152011-113153879	269.84	438.681	0.701068	5e-05	0.000658218	yes
Rsrp1	chr4:134923624-134927370	269.015	269.037	0.000120053	0.9992	0.999442	no
Ndfip1	chr18:38418974-38464406	266.673	263.575	-0.0168602	0.902	0.98099	no
Mitf	chr6:97807057-98021358	265.958	267.523	0.00846683	0.9672	0.993531	no
Prelid1	chr13:55322054-55329730	263.298	269.033	0.0310878	0.82105	0.967427	no
Tm4sf1	chr3:57287063-57301919	262.289	172.713	-0.602776	5e-05	0.000658218	yes
Mt4	chr8:94137203-94139031	261.587	166	-0.656103	0.0002	0.00229676	yes
Ctnna1	chr18:35118911-35254775	261.43	210.939	-0.309599	0.06995	0.281296	no
Pabpc1	chr15:36595657-36608973	261.285	287.755	0.139217	0.3998	0.770312	no
Deb1	chr9:121710388-121712921	259.866	246.317	-0.0772526	0.58195	0.885997	no
Rnasek	chr11:70238122-70239852	259.566	278.682	0.10252	0.4478	0.80811	no
Cdc42	chr4:137319695-137357759	259.417	303.639	0.227086	0.1402	0.450542	no
Tceb2	chr17:23803186-23829109	254.927	275.934	0.114234	0.84785	0.972503	no
Rpl18a	chr8:70894721-70897443	254.917	263.537	0.0479768	0.72975	0.941076	no
Jun	chr4:95049035-95052222	253.462	177.21	-0.516312	0.002	0.0169706	yes
Atp5o	chr16:91925222-91931630	252.665	267.104	0.0801739	0.5473	0.868678	no
Rabac1	chr7:24969749-24972728	250.866	246.237	-0.026869	0.8427	0.970614	no
Capzb	chr4:139192898-139291820	249.684	283.897	0.18526	0.2022	0.553497	no
Rpsa	chr9:120127765-120132369	249.024	244.034	-0.0292045	0.8408	0.969664	no
Mtch1	chr17:29332075-29347904	247.422	196.397	-0.333197	0.02715	0.139909	no
Tpi1	chr6:124808660-124814296	247.2	334.522	0.43642	0.00375	0.0287716	yes
Anxa5	chr3:36448923-36475887	246.805	371.058	0.588277	0.00015	0.00177006	yes
Cst3	chr2:148871731-148875468	246.758	1187.63	2.26692	5e-05	0.000658218	yes
Nme2	chr11:93949813-93956256	246.325	306.911	0.317256	0.02415	0.1279	no
Rpl24	chr16:55966274-55971437	245.735	241.368	-0.0258671	0.8443	0.971263	no
Edf1	chr2:25557899-25562082	245.252	253.61	0.0483481	0.71975	0.936875	no
Eif1	chr11:100319995-100322096	244.686	282.669	0.208182	0.12895	0.426308	no
Rpl37	chr15:5116612-5119140	244.196	240.995	-0.0190362	0.89185	0.979859	no
Ndufb7	chr8:83566757-83571623	242.264	231.728	-0.0641517	0.6477	0.91111	no
Nedd4	chr9:72662346-72749848	241.941	239.002	-0.0176361	0.92605	0.984905	no
Ybx1	chr4:119277326-119294513	241.892	326.074	0.430838	0.0064	0.0448614	yes
Naca	chr10:128035345-128048637	240.663	287.965	0.258879	0.0615	0.2581	no
Hnrnpa2b1	chr6:51460434-51469894	240.166	225.047	-0.0938048	0.5367	0.86303	no
Atp5d	chr10:79697304-80369637	238.308	229.027	-0.0573125	0.8257	0.967427	no
Tecr	chr8:83571697-83594491	238.077	227.253	-0.067129	0.62305	0.903021	no
Atp6v0b	chr4:117884329-117887329	238.002	365.235	0.617849	5e-05	0.000658218	yes
Aes	chr10:81559443-81566371	237.277	204.197	-0.216615	0.11845	0.403634	no
Srsf5	chr12:80945503-80950507	237.138	204.6	-0.21292	0.1436	0.457207	no
Rps27l	chr9:66946117-66949509	236.886	239.392	0.0151811	0.91605	0.982547	no
Scd2	chr19:44293675-44306862	236.674	369.611	0.643106	0.0046	0.0343175	yes
Lamp2	chrX:38401356-38456460	236.028	217.269	-0.119474	0.4797	0.831877	no
Mgst1	chr6:138140536-138156752	234.156	103.435	-1.17874	5e-05	0.000658218	yes
Akt1	chr12:112653820-112674276	233.364	217.407	-0.102182	0.5134	0.850203	no
Tpm4	chr8:72135291-72153129	231.874	395.148	0.769055	5e-05	0.000658218	yes
Rnh1	chr7:141160325-141172851	231.796	271.957	0.230526	0.11155	0.387677	no
Id2	chr12:25093798-25096092	231.414	161.149	-0.52208	0.0002	0.00229676	yes
Ddx17	chr15:79516407-79546741	230.599	208.361	-0.146303	0.40875	0.776777	no
Gpc1	chr1:92831685-92860196	229.887	202.157	-0.185452	0.2686	0.646327	no
Rhoa	chr9:108306204-108337939	229.527	239.065	0.0587401	0.6944	0.928209	no
Myl6	chr10:128490860-128493825	229.341	401.51	0.807943	5e-05	0.000658218	yes
Krt84	chr15:101525025-101532820	229.108	114.906	-0.995577	5e-05	0.000658218	yes
Gnb2	chr5:137528128-137533229	228.993	236.161	0.044464	0.7496	0.945135	no
Sfn	chr4:133600555-133602168	228.345	193.06	-0.242164	0.0967	0.353693	no
Hspa5	chr2:34772089-34776529	228.194	270.776	0.246839	0.1205	0.408043	no
Psmd8	chr7:29174186-29180673	228.134	546.214	1.25958	5e-05	0.000658218	yes
Rps29	chr12:69157721-69159186	227.877	207.749	-0.133412	0.4082	0.776493	no
Basp1	chr15:25363276-25413764	226.764	202.949	-0.160079	0.2739	0.652992	no
Marcks	chr10:37133242-37138926	226.69	179.17	-0.339392	0.05625	0.241706	no
Scd1	chr19:44394449-44407709	226.413	296.244	0.387832	0.06315	0.262452	no
Gapdh	chr6:125161851-125166467	226.41	349.515	0.62642	5e-05	0.000658218	yes
Sep15	chr3:144570426-144597676	224.5	255.824	0.188441	0.1823	0.523738	no
Atp5j	chr16:84827870-84863778	223.109	196.041	-0.186593	0.34635	0.724307	no
Dad1	chr14:54235484-54253929	222.744	243.48	0.128417	0.3471	0.724672	no
Rpl36al	chr12:69182733-69184067	221.992	262.283	0.24062	0.0882	0.331994	no
Stfa3	chr16:36450536-36455392	220.664	192.103	-0.199967	0.246	0.614827	no
Rpl36a	chrX:134585653-134588062	220.62	200.834	-0.135559	0.3511	0.727882	no
Atp1b3	chr9:96332674-96364299	219.316	239.196	0.125183	0.37945	0.754841	no
Btf3	chr13:98309896-98317006	219.297	222.343	0.0198991	0.8794	0.977855	no
Arpc2	chr1:74236549-74268213	219.089	296.016	0.43416	0.00255	0.0207306	yes
Cnbp	chr6:87842614-87851106	219.071	214.184	-0.0325441	0.82145	0.967427	no
Fkbp1a	chr2:151542482-151561691	218.891	234.414	0.0988489	0.4861	0.834634	no
Adgre5	chr8:83715176-83741311	218.831	164.247	-0.413952	0.0167	0.0965598	no
Psmb4	chr3:94884323-94886958	218.182	234.637	0.104898	0.4311	0.793546	no
Eif1ax	chrX:159372194-159385699	216.849	209.608	-0.0489951	0.71425	0.9357	no
Rac1	chr5:143505480-143527993	215.44	206.627	-0.060264	0.6786	0.920638	no
Hmgcs1	chr13:119690350-119708260	215.358	181.308	-0.248293	0.1266	0.421344	no
Aebp1	chr11:5861865-5878256	214.358	107.513	-0.995514	5e-05	0.000658218	yes
Atp6v0e	chr17:26676395-26699646	213.268	261.811	0.295858	0.02755	0.141442	no
Cox5b	chr1:36691486-36693388	213.082	232.286	0.124493	0.36565	0.741575	no
Sdhb	chr4:140961270-140979192	212.646	245.592	0.207813	0.12125	0.409689	no
Krt6a	chr15:101689927-101694305	211.169	248.599	0.235421	0.23255	0.594758	no
Mdh2	chr5:135778648-135790386	211.152	239.236	0.180152	0.18695	0.53144	no
Hspa8	chr9:40801272-40805199	210.902	297.464	0.496139	0.00105	0.00978581	yes
Gm6793	chr2:75659258-75669407	210.671	200.144	-0.0739508	0.6447	0.90957	no
Ndufa3	chr7:3617372-3620161	210.198	215.413	0.0353561	0.8388	0.969516	no
Atp5c1	chr2:10056030-10080510	209.418	193.723	-0.11239	0.4036	0.772907	no
P4hb	chr11:120560303-120572936	206.424	244.292	0.242996	0.1121	0.389261	no
Arf1	chr11:59211411-59228267	205.955	205.909	-0.000319737	0.9985	0.999394	no
Rpl22l1	chr3:28805510-28807415	205.618	239.682	0.221156	0.1328	0.434867	no
Arpc3	chr5:122391927-122406178	205.199	291.648	0.507201	0.0001	0.00122911	yes
Atox1	chr11:55446642-55461138	204.495	207.922	0.0239768	0.86975	0.977494	no
Clta	chr4:44012642-44032848	204.463	204.744	0.00198239	0.98865	0.997084	no
Scpep1	chr11:88905927-88955442	204.39	277.883	0.443148	0.00345	0.0268012	yes
Glmp	chr3:88325022-88328631	203.437	197.651	-0.0416257	0.7642	0.950692	no
Snrpb	chr2:130171635-130179364	203.07	183.38	-0.147135	0.27195	0.651107	no
Eif4a1	chr11:69666935-69672423	202.542	220.451	0.122239	0.39585	0.766388	no
Pdia3	chr2:121413901-121438686	202.414	235.302	0.217202	0.1582	0.484434	no
Rps7	chr12:28630846-28635953	202.329	214.276	0.0827676	0.53775	0.863792	no
Raly	chr2:154791109-154867261	201.885	212.666	0.0750564	0.60845	0.896894	no
Eif3f	chr7:108934414-108941942	200.375	195.509	-0.0354693	0.79645	0.960316	no
Lta4h	chr10:93453395-93484896	200.336	119.938	-0.740131	5e-05	0.000658218	yes
Ndufb8	chr19:44550253-44555415	200.24	206.062	0.0413497	0.76325	0.950692	no
Pcbp1	chr6:86524496-86526165	200.137	193.153	-0.0512461	0.71255	0.935547	no
Dkk3	chr7:112116018-112159057	199.463	124.909	-0.675243	5e-05	0.000658218	yes
Atp6v1e1	chr6:120795243-120822685	199.326	235.387	0.2399	0.08255	0.317072	no
Vamp8	chr6:72385220-72390667	199.076	240.34	0.271762	0.0418	0.194931	no
Aplp2	chr9:31149556-31211815	198.781	135.272	-0.555312	0.00055	0.00563807	yes
Ndufb9	chr15:58933809-58939489	197.547	198.421	0.00636994	0.9655	0.993295	no
Sod1	chr16:90220741-90226324	197.285	178.696	-0.142775	0.29695	0.675267	no
Cxcl14	chr13:56288642-56296551	197.027	129.127	-0.60961	5e-05	0.000658218	yes
Ddb1	chr19:10605624-10629821	196.743	230.736	0.229932	0.18495	0.528052	no
Malat1	chr19:5795689-5802671	196.247	211.432	0.107524	0.6223	0.903021	no
Mlf2	chr6:124931387-124936149	195.94	202.705	0.048972	0.7154	0.936318	no
Rps28	chr17:33823036-33824498	195.811	174.631	-0.165151	0.38095	0.755208	no
Dynlrb1	chr2:155236532-155250277	195.359	229.746	0.233909	0.0856	0.32447	no
Gpx4	chr10:79697304-80369637	195.279	167.936	-0.217628	0.93155	0.986667	no
Atp6v1g1	chr4:63544764-63550701	194.926	205.033	0.0729269	0.58865	0.888125	no
Glrb	chr3:80843598-80913660	193.596	120.906	-0.679171	5e-05	0.000658218	yes
Cdk4	chr10:127063602-127067282	193.432	152.817	-0.340021	0.01215	0.0754528	no
Gnb1	chr4:155491360-155559269	193.404	175.547	-0.139766	0.36515	0.741045	no
H3f3a	chr1:180802567-180813603	192.077	175.915	-0.126805	0.34385	0.722994	no
Bmyc	chr2:25706878-25707719	191.638	90.0798	-1.08911	5e-05	0.000658218	yes
Ctsz	chr2:174415803-174438992	191.38	385.715	1.0111	5e-05	0.000658218	yes
Msn	chrX:96096044-96168553	191.095	270.008	0.498716	0.0038	0.0290654	yes
Rtn4	chr11:29692897-30026033	190.724	168.137	-0.181845	0.28015	0.658539	no
Atp6v1f	chr6:29467782-29470509	190.29	239.211	0.330083	0.01745	0.099919	no
Krt17	chr11:100256216-100260989	190.272	181.896	-0.0649466	0.6548	0.912536	no
Tuba1a	chr15:98949846-98953501	189.831	219.72	0.210949	0.12835	0.42523	no
Cct5	chr15:31590883-31601804	189.729	189.814	0.000642288	0.99595	0.998962	no
Id3	chr4:136143821-136145392	189.398	69.9302	-1.43743	5e-05	0.000658218	yes
Degs1	chr1:182275769-182282759	188.892	183.584	-0.0411163	0.76635	0.95143	no
Tspan10	chr11:120442630-120447321	188.751	129.099	-0.548001	0.0001	0.00122911	yes
Snord22	chr19:8723486-8726326	188.712	118.311	-0.6736	0.7595	0.949012	no
Eif4h	chr5:134619875-134639328	186.759	170.839	-0.128537	0.37185	0.747191	no
Arpc1b	chr5:145114255-145128186	186.369	247.717	0.410531	0.00265	0.0214453	yes
2310036O22Rik	chr8:85026832-85030286	186.12	175.797	-0.0823211	0.5413	0.865833	no
Uqcc2	chr17:27122664-27133891	185.589	194.297	0.0661517	0.6629	0.914469	no
Cnn3	chr3:121426540-121458205	185.138	173.905	-0.0903007	0.52315	0.855814	no
Cct2	chr10:117050997-117063814	184.402	193.007	0.0657993	0.63425	0.905446	no
Dhcr24	chr4:106561037-106589113	184.129	137.135	-0.425124	0.00835	0.0556099	no
Rps3a1	chr3:86137939-86142668	183.976	173.03	-0.0884954	0.5443	0.867721	no
Ctsb	chr14:63122461-63179578	183.697	393.067	1.09745	5e-05	0.000658218	yes
Slc7a8	chr14:54722214-54781886	183.641	156.456	-0.231132	0.15595	0.480269	no
Ndufb10	chr17:24722066-24724388	183.374	182.084	-0.0101844	0.9387	0.988752	no
Smdt1	chr15:82346045-82349062	182.865	189.563	0.0519036	0.71255	0.935547	no
Dazap2	chr15:100615661-100620761	182.375	182.798	0.00334403	0.98035	0.996386	no
Mir8104	chr10:122678761-122945793	182.03	1.35272e-12	-46.9353	0.39425	0.765634	no
Pmp22	chr11:62951192-63386069	181.874	85.0261	-1.09696	5e-05	0.000658218	yes
Sdc3	chr4:130792536-130826318	181.581	123.497	-0.556133	0.0014	0.0125484	yes
Uqcrc1	chr9:108936647-108949641	181.366	184.339	0.0234578	0.86675	0.977149	no
Chmp2a	chr7:13032005-13034777	181.159	184.689	0.0278447	0.8332	0.968134	no
Oxct1	chr15:4020110-4155344	180.949	225.561	0.317931	0.0519	0.228551	no
Rab7	chr6:87999105-88045270	180.115	176.454	-0.0296286	0.83265	0.96802	no
Atp6v0d1	chr8:105524469-105566040	179.656	181.746	0.0166863	0.903	0.98099	no
Arpc5	chr1:152766541-152775580	179.379	202.655	0.176017	0.20575	0.556966	no
Tspan7	chrX:10485115-10596604	179.225	82.6921	-1.11595	5e-05	0.000658218	yes
Pfdn5	chr15:102326115-102331489	179.089	168.164	-0.0908089	0.5134	0.850203	no
Snrnp70	chr7:45376453-45395742	178.704	165.019	-0.114939	0.51155	0.849086	no
Cox5a	chr9:57521231-57532426	178.654	203.076	0.184852	0.17585	0.51401	no
Tmem256	chr11:69838524-69839558	178.585	130.181	-0.456094	0.00665	0.046119	yes
Usmg5	chr19:47067747-47090625	176.59	185.734	0.0728288	0.72355	0.938672	no
Eif4g2	chr7:111067984-111083030	176.559	167.663	-0.0745849	0.708	0.93382	no
Myo5a	chr9:75071205-75223687	175.883	140.357	-0.32552	0.15935	0.486223	no
Nedd8	chr14:55662266-55671906	175.874	178.043	0.0176907	0.89885	0.98099	no
Hypk	chr2:121457087-121458440	175.471	178.073	0.0212433	0.8874	0.979177	no
Eif3b	chr5:140419304-140443358	175.334	163.221	-0.103283	0.47805	0.830292	no
Hsd17b12	chr2:94032696-94157909	175.234	206.639	0.237833	0.0866	0.327361	no
Uap1l1	chr2:25361491-25365626	174.978	152.987	-0.193759	0.1613	0.48922	no
Nckap1	chr2:80500511-80581182	174.957	155.045	-0.174307	0.27965	0.658539	no
Krt79	chr15:101929331-101940324	174.924	120.173	-0.541617	0.0006	0.00608033	yes
Vdac1	chr11:52361114-52389396	174.619	182.721	0.0654379	0.63355	0.905446	no
Cd151	chr7:141467361-141471481	174.252	196.22	0.1713	0.22575	0.586181	no
Gng11	chr6:4003986-4008446	174.134	179.546	0.0441576	0.74645	0.944824	no
Ndufa7	chr17:33824571-33838316	173.893	185.671	0.0945468	0.5217	0.855814	no
Wdr1	chr5:38526812-38561595	173.875	314.634	0.855623	5e-05	0.000658218	yes
Hnrnpu	chr1:178328299-178337784	173.81	167.542	-0.0529835	0.74225	0.944824	no
Coro1c	chr5:113842438-113908706	173.803	232.499	0.419775	0.0077	0.0518653	no
Plat	chr8:22757721-22782848	173.568	89.3398	-0.958125	5e-05	0.000658218	yes
Itgb1	chr8:128685653-128733579	173.281	264.783	0.611699	0.00065	0.006476	yes
BC100530	chr16:36359381-36367570	173.007	187.565	0.116561	0.48625	0.834634	no
Cap1	chr4:122836226-122886057	172.151	320.524	0.896759	5e-05	0.000658218	yes
Ogdh	chr11:6291596-6359094	172.131	171.015	-0.00938348	0.96105	0.992408	no
Glul	chr1:153899925-153909723	172.071	120.667	-0.511972	0.0004	0.00424048	yes
Psmb7	chr2:38588045-38643906	171.944	180.259	0.0681308	0.6124	0.898179	no
Hnrnpk	chr13:58391131-58411149	171.902	171.057	-0.00710871	0.9599	0.992408	no
Oaz1	chr10:80826655-80829290	171.274	129.804	-0.399975	0.0156	0.0914346	no
Smyd2	chr1:189880491-189922288	170.781	183.629	0.10465	0.44725	0.80756	no
Cox7a2	chr9:79755240-79759853	170.764	161.653	-0.0791021	0.55955	0.875946	no
Gm1821	chr14:46084026-46084957	170.28	165.26	-0.043171	0.84845	0.972634	no
Bzw1	chr1:58393135-58406548	169.884	166.292	-0.030829	0.8379	0.969407	no
Serinc1	chr10:57515774-57532529	169.65	172.515	0.0241597	0.86695	0.977149	no
Ywhab	chr2:163995196-164018587	169.334	178.664	0.0773766	0.60585	0.895492	no
Srsf2	chr11:116849896-116853094	169.235	157.741	-0.101469	0.4666	0.821613	no
Ddx39b	chr17:35241745-35253707	168.8	149.864	-0.171665	0.2091	0.562148	no
Gm15772	chr11:68901565-68904534	168.696	148.634	-0.182665	0.50695	0.846553	no
Myeov2	chr1:92637144-92641985	168.452	168.654	0.00173302	0.9906	0.997753	no
Hsp90b1	chr10:86690840-86705444	167.138	197.916	0.243845	0.10435	0.371281	no
Rab5c	chr11:100715002-100738215	165.931	162.554	-0.0296588	0.83285	0.968134	no
Prdx2	chr8:84969647-84974313	165.393	132.558	-0.319278	0.01965	0.108851	no
Prkar1a	chr11:109650948-109669648	164.906	167.995	0.0267778	0.8627	0.97663	no
Msmo1	chr8:64718144-64733578	164.659	150.802	-0.126825	0.3598	0.736531	no
Junb	chr8:84976908-84978748	164.501	147.785	-0.1546	0.25375	0.62501	no
St3gal6	chr16:58470540-58523312	164.399	156.365	-0.072287	0.5983	0.892242	no
Mknk2	chr10:80665317-80676293	164.298	119.604	-0.458051	0.00195	0.0166145	yes
C2	chr17:34862601-34882100	164.227	129.57	-0.341968	0.01725	0.0989563	no
Cd44	chr2:102811141-102901665	164.224	157.398	-0.0612536	0.70655	0.933527	no
Cotl1	chr8:119809213-119840579	164.207	272.937	0.733048	5e-05	0.000658218	yes
Flna	chrX:74223460-74246534	164.015	406.704	1.31015	5e-05	0.000658218	yes
Swi5	chr2:32278804-32288069	163.235	154.059	-0.0834681	0.54585	0.868185	no
Eif3h	chr15:51786562-51865461	163.106	171.407	0.071618	0.59655	0.891957	no
Sec11c	chr18:65800577-65817657	163.009	225.955	0.471088	0.00095	0.00896147	yes
Renbp	chrX:73922120-73930850	162.4	149.778	-0.116729	0.395	0.765892	no
Chchd2	chr5:129881160-129887470	162.161	164.688	0.0223075	0.8701	0.977494	no
Ptbp1	chr10:79697304-80369637	162.07	144.866	-0.161897	0.88855	0.979177	no
Phb2	chr6:124712288-124716945	161.546	170.85	0.0807849	0.5446	0.867721	no
Mrpl52	chr14:54426908-54429750	161.294	182.374	0.177208	0.28395	0.662197	no
Uqcrb	chr13:66900620-66905350	161.122	156.696	-0.0401876	0.7903	0.959286	no
Pla2g2e	chr4:138877941-138882814	160.824	236.571	0.556788	5e-05	0.000658218	yes
D8Ertd738e	chr8:84246234-84249761	160.698	157.31	-0.0307399	0.8255	0.967427	no
Pcolce2	chr9:95637627-95695551	160.544	67.9009	-1.24146	5e-05	0.000658218	yes
Cuta	chr17:26937971-26939538	160.441	138.453	-0.212646	0.14085	0.451462	no
Grina	chr15:76246806-76249904	160.394	127.108	-0.335561	0.0141	0.0847639	no
Atp6ap1	chrX:74297096-74304721	160.088	161.448	0.0122052	0.9334	0.986987	no
Ybx3	chr6:131364857-131388450	159.305	150.867	-0.0785134	0.56995	0.880896	no
Aqp3	chr4:41092723-41098183	159.204	132.863	-0.260941	0.05965	0.251955	no
Tmem59	chr4:107178629-107200996	159.143	163.116	0.0355713	0.7945	0.959977	no
Rab27a	chr9:73044809-73097614	159.053	128.778	-0.304624	0.0427	0.19779	no
Cyc1	chr15:76343522-76345934	158.67	147.928	-0.101138	0.45695	0.815036	no
Mlph	chr1:90915099-90951142	158.569	116.99	-0.438727	0.0074	0.0502261	no
Psma2	chr13:14613241-14625673	158.508	160.399	0.0171134	0.90125	0.98099	no
Tmem14c	chr13:41016249-41022582	158.065	142.836	-0.146161	0.2741	0.653093	no
Eef1g	chr19:8967040-8978180	157.507	156.032	-0.0135745	0.9143	0.982354	no
Pomp	chr5:147860627-147875778	157.335	162.819	0.049436	0.72035	0.937263	no
Bola2	chr7:126695999-126696693	156.237	166.644	0.0930346	0.61785	0.901576	no
Psma6	chr12:55280813-55492647	155.845	164.728	0.0799652	0.71935	0.936778	no
Emp1	chr6:135362930-135383173	155.354	226.51	0.544022	0.0003	0.00326971	yes
Tbca	chr13:94788942-94842899	155.331	173.961	0.163417	0.2804	0.658628	no
Dynll2	chr11:87979524-87998298	155.273	88.3669	-0.813226	5e-05	0.000658218	yes
Hmgn1	chr16:96121587-96127725	155.258	138.749	-0.16219	0.23225	0.594342	no
Clic4	chr4:135213969-135272760	154.736	170.932	0.143611	0.3718	0.747191	no
Ubxn1	chr19:8871558-8875656	154.732	143.406	-0.109667	0.4116	0.779187	no
Calu	chr6:29348105-29380513	154.437	251.729	0.704848	5e-05	0.000658218	yes
Fam120a	chr13:48879216-48967828	154.229	154.289	0.000560464	0.9975	0.99911	no
Dctn2	chr10:127266261-127288771	153.927	154.624	0.00652046	0.96855	0.994229	no
Cyb5r3	chr15:83153500-83172208	153.924	188.773	0.29444	0.03525	0.171337	no
Eef1b2	chr1:63176830-63180486	153.746	165.134	0.103083	0.44895	0.809099	no
Ewsr1	chr11:5069686-5099088	153.468	149.804	-0.0348607	0.81565	0.966165	no
Psmb1	chr17:15475720-15498276	153.231	163.164	0.0906171	0.4959	0.840801	no
Snrpd2	chr7:19149837-19152726	153.166	158.1	0.0457435	0.7749	0.953187	no
Atp5h	chr11:115415696-115419919	153.094	138.265	-0.146984	0.3225	0.699996	no
Ddx3x	chrX:13281021-13293983	153.021	118.387	-0.370224	0.0187	0.105042	no
Chmp4b	chr2:154657025-154694783	152.879	190.32	0.31603	0.01995	0.110071	no
Csnk1a1	chr18:61555581-61588299	152.827	148.743	-0.0390857	0.77545	0.953363	no
Dstn	chr2:143915330-143943324	152.64	219.639	0.524995	0.0001	0.00122911	yes
Psmc3	chr2:91054015-91059438	152.333	162.411	0.0924224	0.4913	0.83835	no
Ost4	chr5:30888851-30907788	151.462	169.6	0.163183	0.3056	0.683038	no
Eif3c	chr7:126546910-126566366	151.155	155.678	0.0425337	0.77285	0.952516	no
Myl12a	chr17:70993792-71002533	151.134	196.561	0.37915	0.00595	0.0423285	yes
Romo1	chr2:156123636-156145794	150.885	147.807	-0.0297334	0.90405	0.98099	no
Anxa6	chr11:54978961-55033471	150.63	139.894	-0.106674	0.4627	0.818815	no
Ppp2r1a	chr17:20945453-20965905	150.558	154.025	0.0328463	0.81475	0.966139	no
Defb6	chr8:19225477-19228209	150.449	122.766	-0.293359	0.1745	0.511147	no
Angptl2	chr2:33133418-33371494	150.23	228.711	0.606355	0.00015	0.00177006	yes
Calm1	chr12:100199540-100209806	149.921	264.302	0.817989	5e-05	0.000658218	yes
Park7	chr4:150897132-150909921	149.854	134.456	-0.156426	0.254	0.625378	no
Ak3	chr19:28990351-29048729	149.307	92.3219	-0.693534	0.00025	0.00280352	yes
Fkbp8	chr8:70527742-70535328	148.967	125.766	-0.244251	0.07265	0.288785	no
Pabpn1	chr14:54894142-54898927	148.41	140.018	-0.0839749	0.54285	0.867079	no
Ap2s1	chr7:16738443-16749290	148.196	161.16	0.120989	0.38035	0.754841	no
Tmed9	chr13:55593134-55597694	147.724	170.319	0.20533	0.1285	0.425386	no
Cers2	chr3:95315251-95357202	147.544	170.212	0.206184	0.18355	0.525891	no
Srp14	chr2:118475842-118479696	147.131	140.203	-0.0695863	0.6163	0.900406	no
Fam25c	chr14:34351881-34355393	146.918	131.715	-0.157594	0.40765	0.776161	no
Adam10	chr9:70679000-70780229	146.682	124.58	-0.235616	0.14075	0.451462	no
Fdps	chr3:89093587-89101967	146.517	175.482	0.260256	0.05465	0.23622	no
Mrfap1	chr5:36794866-36796754	146.295	138.834	-0.075523	0.5823	0.885997	no
Vdac2	chr14:21831560-21848910	146.216	156.389	0.0970448	0.49045	0.837992	no
Eif3i	chr4:129591973-129600648	145.725	157.864	0.115435	0.3855	0.759496	no
Rbbp7	chrX:162407199-163352564	145.586	105.124	-0.469787	0.00775	0.0521738	no
Iqgap1	chr7:80711582-80803331	145.047	209.475	0.530259	0.0077	0.0518653	no
Ppp2ca	chr11:52098823-52122749	144.754	162.684	0.168462	0.224	0.584311	no
Tmem258	chr19:10204201-10207824	144.488	162.637	0.170702	0.30935	0.685984	no
Scand1	chr2:156311845-156375638	143.874	116.196	-0.308246	0.03385	0.166092	no
Smpd1	chr7:105554359-105558389	143.448	100.271	-0.516627	5e-05	0.000658218	yes
Ndufa1	chrX:37187588-37191238	143.385	133.24	-0.105864	0.51275	0.849776	no
Rab1b	chr19:5099206-5106996	143.236	153.823	0.102876	0.4565	0.815036	no
Npc2	chr12:84754558-84773112	143.002	127.021	-0.170973	0.23985	0.605429	no
Atp11a	chr8:12757015-12868728	142.702	157.236	0.139924	0.471	0.824217	no
Ttyh2	chr11:114344525-114757886	142.458	86.0665	-0.727014	5e-05	0.000658218	yes
Tmem189	chr2:167643224-167661544	142.289	109.114	-0.382978	0.00515	0.0378073	yes
Serpinh1	chr7:99345374-99353239	142.251	133.237	-0.0944427	0.5039	0.844299	no
Cdh3	chr8:106510851-106556911	141.173	48.0843	-1.55383	5e-05	0.000658218	yes
Rhob	chr12:8497758-8499985	141.108	234.363	0.731944	5e-05	0.000658218	yes
Ezr	chr17:6738130-6782780	140.884	132.584	-0.0876023	0.5416	0.865833	no
Rnf187	chr11:58932287-58938906	140.855	119.978	-0.231442	0.08865	0.333384	no
Rpl34,Rpl34-ps1	chr3:130726826-130730398	139.778	141.43	0.0169432	0.93965	0.988795	no
Cd81	chr7:143021783-143067930	139.735	247.421	0.824278	5e-05	0.000658218	yes
Mfge8	chr7:79133767-79149060	139.674	120.226	-0.216314	0.1225	0.412453	no
Myh9	chr15:77760584-77842175	139.575	239.353	0.778095	0.00025	0.00280352	yes
Hnrnpm	chr17:33646232-33685458	139.465	134.355	-0.0538503	0.6956	0.928581	no
Ndufs2	chr1:171234859-171247112	139.268	134.172	-0.053777	0.6926	0.927001	no
Lamtor2	chr3:88549818-88552927	139.22	140.63	0.0145404	0.9213	0.983999	no
Gpr143	chrX:152781920-152808646	139.134	89.9692	-0.628972	5e-05	0.000658218	yes
Anxa8	chr14:34051129-34102754	139.102	138.289	-0.00845351	0.953	0.990793	no
Canx	chr11:50293956-50325673	139.044	138.654	-0.00405911	0.9782	0.99595	no
Grcc10	chr6:124739183-124741079	138.887	159.121	0.196218	0.18925	0.5337	no
Gpi1	chr7:34201326-34230336	138.786	168.552	0.280331	0.05495	0.237352	no
Eif4g1	chr16:20672726-20692883	138.613	140.352	0.0179877	0.91515	0.982547	no
St13	chr15:81365043-81399694	138.394	124.823	-0.148893	0.2665	0.643019	no
Gdi2	chr13:3538074-3611108	138.278	144.968	0.0681637	0.65545	0.912536	no
Sbsn	chr7:30751470-30756134	138.044	135.879	-0.0228053	0.89035	0.979297	no
Sin3b	chr8:72723269-72758203	137.957	144.71	0.0689473	0.6398	0.907968	no
Psma7	chr2:180036366-180042464	137.924	162.941	0.240478	0.0741	0.292675	no
Ergic3	chr2:156008124-156018279	137.741	139.783	0.0212343	0.8787	0.977855	no
Coro1b	chr19:4148662-4154035	137.097	127.593	-0.103647	0.44175	0.803735	no
Hnrnpl	chr7:28810889-28822266	136.614	137.443	0.00872678	0.94775	0.990112	no
Col16a1	chr4:130047839-130099277	136.505	85.1856	-0.680274	5e-05	0.000658218	yes
Mid1ip1	chrX:10717364-10719702	136.376	115.958	-0.233996	0.08555	0.324379	no
Sgpl1	chr10:61098641-61147665	136.348	106.397	-0.357836	0.0175	0.100067	no
Cops6	chr5:138161101-138163984	136.269	140.732	0.0464937	0.7361	0.942985	no
Ssr4	chrX:73787027-73790828	136.242	155.936	0.19478	0.1668	0.498113	no
Psmb6	chr11:70525356-70527858	136.071	139.786	0.0388582	0.76925	0.952049	no
Ndufs6	chr13:73319875-73328482	136.06	123.174	-0.143544	0.372	0.74725	no
Myadm	chr7:3289037-3299349	135.881	228.532	0.750052	5e-05	0.000658218	yes
Anapc5	chr5:122787460-122821342	135.807	141.833	0.0626279	0.6559	0.912688	no
Cdh1	chr8:106603367-106670246	135.8	109.267	-0.31362	0.0396	0.186918	no
Rrp1	chr10:78400361-78413043	135.666	133.916	-0.0187255	0.8887	0.979177	no
Slc24a4	chr12:102129418-102266749	135.341	204.068	0.59245	5e-05	0.000658218	yes
Bloc1s1	chr10:128919913-128923524	135.042	127.629	-0.0814506	0.60175	0.893318	no
Fis1	chr5:136953274-136966234	135.021	128.229	-0.0744668	0.5962	0.891957	no
Adgrg1	chr8:94977108-95014208	135.013	71.1476	-0.924207	5e-05	0.000658218	yes
Ndufa6	chr15:82350138-82354291	134.461	140.542	0.0638154	0.6736	0.91841	no
Ninj1	chr13:49187546-49196251	134.265	261.567	0.962094	5e-05	0.000658218	yes
Bcap31	chrX:73686182-73716175	134.106	138.655	0.0481222	0.721	0.937713	no
Ubb	chr11:62551503-62553212	133.681	148.29	0.149619	0.4005	0.770872	no
Ahnak	chr19:8989283-9076926	133.235	113.638	-0.229523	0.34115	0.719632	no
Lima1	chr15:99778467-99875456	133.138	149.176	0.164092	0.294	0.672511	no
Spg21	chr9:65460936-65488470	132.879	83.0073	-0.678801	5e-05	0.000658218	yes
Ndufc1	chr3:51405478-51408955	132.324	122.146	-0.115474	0.52295	0.855814	no
Timp2	chr11:118301060-118355411	132.107	157.388	0.252617	0.09985	0.361457	no
Snrpd3	chr10:75518041-75535440	132.099	130.304	-0.0197409	0.8936	0.980567	no
Hspa9	chr18:34937414-34954351	131.623	149.001	0.17891	0.21205	0.565654	no
Met	chr6:17463956-17573980	131.536	97.4315	-0.433001	0.0086	0.0568177	no
Anp32b	chr4:46451116-46472523	131.191	146.201	0.156286	0.2441	0.611926	no
Sept9	chr11:117199660-117362325	131.084	119.072	-0.138657	0.34965	0.726331	no
S100a11	chr3:93520495-93526288	130.861	135.757	0.0529942	0.7457	0.944824	no
Ndufb6	chr4:40270662-40279368	130.695	142.878	0.128578	0.40495	0.774107	no
Sh3bgrl3	chr4:134127405-134128753	130.682	153.329	0.230567	0.0984	0.357907	no
Prdx5	chr19:6906818-6909645	130.435	123.422	-0.0797426	0.58495	0.886931	no
Rcc2	chr4:140701472-140723220	130.276	126.097	-0.0470289	0.7503	0.945223	no
Cope	chr8:70302784-70312990	130.14	133.998	0.0421483	0.75045	0.945316	no
Sptssa	chr12:54645373-54656572	130.043	103.961	-0.322946	0.0162	0.0942835	no
Rpl27a	chr7:109519194-109522369	129.676	130.158	0.00535852	0.9688	0.994239	no
Sfpq	chr4:127021300-127037014	129.506	107.783	-0.264886	0.06645	0.271174	no
Tspo	chr15:83563572-83574203	129.486	121.744	-0.088951	0.52035	0.855064	no
Ndufa2	chr18:36735069-36744587	129.03	130.042	0.0112616	0.94525	0.989509	no
Wsb2	chr5:117357304-117378589	128.969	133.321	0.0478776	0.72975	0.941076	no
Psmd2	chr16:20651651-20663414	128.933	135.212	0.0685942	0.6322	0.905446	no
Klc1	chr12:111758848-111813841	128.684	154.02	0.259276	0.0765	0.299959	no
Nadk	chr4:155562391-155591001	128.471	83.9974	-0.613027	5e-05	0.000658218	yes
Gstm1	chr3:108012249-108017973	128.415	72.285	-0.82905	5e-05	0.000658218	yes
Pebp1	chr5:117282650-117287564	128.378	115.537	-0.152045	0.25975	0.63338	no
C1qbp	chr11:70970199-70983026	128.31	127.257	-0.0118854	0.9363	0.98795	no
Ilk	chr7:105731729-105744338	128.301	160.432	0.322429	0.0583	0.247685	no
Brk1	chr6:113604771-113616951	128.299	130.882	0.0287479	0.8314	0.967848	no
Taldo1	chr7:141392159-141402976	128.261	117.24	-0.12961	0.33915	0.718343	no
Tubb4b	chr2:25218744-25224702	127.924	118.851	-0.106133	0.43395	0.797138	no
Actn4	chr7:28881655-28962280	127.091	163.623	0.364512	0.0168	0.0970024	no
Eif3k	chr7:28971371-28981888	126.745	127.143	0.00452363	0.9729	0.994633	no
Zfp36l1	chr12:80107759-80113013	126.654	147.847	0.223215	0.12505	0.418091	no
Jund	chr8:70697738-70700616	126.548	106.636	-0.246989	0.07975	0.309574	no
Hexa	chr9:59539666-59565105	126.284	188.828	0.580404	5e-05	0.000658218	yes
Ndufv3	chr17:31520114-31531325	126.133	120.697	-0.0635567	0.7366	0.942985	no
Eif3g	chr9:20894348-20898590	126.071	136.556	0.11525	0.3896	0.762208	no
Atf4	chr15:80255183-80257545	126.025	164.95	0.388317	0.0059	0.0422148	yes
Uba1	chrX:20658301-20683179	125.948	135.039	0.100544	0.4967	0.840801	no
Nme1	chr11:93958924-93968521	125.938	138.933	0.141682	0.29495	0.673567	no
Ndufb3	chr1:58586598-58595948	125.906	144.134	0.195065	0.2114	0.564856	no
Dsp	chr13:38151293-38198577	125.549	118.606	-0.0820676	0.68945	0.925753	no
S100a14	chr3:90526848-90528835	125.115	106.488	-0.232563	0.1003	0.362165	no
Zfp36	chr7:28376783-28379228	125.095	171.071	0.451573	0.0011	0.010183	yes
Cct3	chr3:88297134-88321766	125.045	133.473	0.0941024	0.4853	0.834444	no
Bag1	chr4:40936397-40948294	124.998	132.528	0.0843887	0.5313	0.861112	no
Tinagl1	chr4:130165599-130175122	124.915	80.6415	-0.631357	5e-05	0.000658218	yes
Qk	chr17:10206470-10319361	124.437	94.1009	-0.403139	0.0102	0.0656757	no
Csnk2b	chr17:35116194-35124815	124.375	123.614	-0.00885705	0.9495	0.990262	no
Mcl1	chr3:95658720-95663178	124.113	147.599	0.250029	0.0896	0.335433	no
Aldh2	chr5:121566026-121593824	123.917	163.46	0.399564	0.00785	0.0526756	no
Pcbp2	chr15:102470631-102517004	123.684	116.691	-0.0839608	0.55825	0.875567	no
Skp1a	chr11:52231994-52246858	123.579	118.322	-0.0627198	0.64135	0.908457	no
Clk1	chr1:58411987-58424088	123.542	105.882	-0.222552	0.1142	0.39369	no
Ugp2	chr11:21239031-21371267	123.004	146.164	0.248876	0.12505	0.418091	no
Tcp1	chr17:12916328-12940396	122.822	127.16	0.0500753	0.71705	0.9366	no
Arl2	chr19:6134388-6141137	122.643	112.38	-0.126086	0.3705	0.746028	no
Ctsa	chr2:164830729-164857708	122.472	182.28	0.573709	0.0006	0.00608033	yes
Gm2115	chr7:84528953-84578339	121.958	82.1117	-0.57072	5e-05	0.000658218	yes
Cthrc1	chr15:39076931-39087119	121.958	29.8036	-2.03283	5e-05	0.000658218	yes
Gng5	chr3:146499835-146505543	121.823	139.639	0.19691	0.2118	0.565438	no
Tpp1	chr7:105744846-105752207	121.767	115.124	-0.0809261	0.57085	0.8813	no
Bst2	chr8:71534261-71537437	121.524	44.5392	-1.44809	5e-05	0.000658218	yes
Serpinb1a	chr13:32842091-32851185	121.267	90.1938	-0.427089	0.00155	0.0137049	yes
Cct8	chr16:87454984-87495869	121.052	142.89	0.239269	0.128	0.424524	no
Fxyd3	chr7:31059934-31076697	120.694	142.682	0.241444	0.1612	0.489156	no
Mrpl20	chr4:155803617-155808829	120.474	121.958	0.0176635	0.90435	0.98099	no
Ndufv1	chr19:4007498-4012755	120.144	121.234	0.0130329	0.9277	0.985231	no
Nudt16l1	chr16:4886099-4941020	119.475	93.6314	-0.351647	0.1183	0.403344	no
Pdia6	chr12:17266594-17324730	119.422	135.722	0.184594	0.18845	0.533019	no
Rpl27	chr11:101442244-101445596	119.032	109.128	-0.125323	0.38765	0.760409	no
Tmem50a	chr4:134897848-134914916	118.889	128.926	0.116929	0.38655	0.759496	no
Higd2a	chr13:54590230-54591147	118.359	131.713	0.154225	0.30755	0.684461	no
Lmo4	chr3:144188529-144205255	118.332	63.9992	-0.886721	5e-05	0.000658218	yes
Timm8b	chr9:50603900-50625000	118.306	139.289	0.235562	0.21315	0.566847	no
Hnrnpa0	chr13:58125878-58128556	118.269	93.9284	-0.332445	0.01905	0.10643	no
Stx12	chr4:132854063-132884458	117.963	104.553	-0.174098	0.2028	0.553778	no
Eif3l	chr15:79075222-79094400	117.794	117.216	-0.0070977	0.96015	0.992408	no
Hdgf	chr3:87906320-87916132	117.719	109.924	-0.0988374	0.464	0.819479	no
Ddrgk1	chr2:130654082-130664645	117.661	112.592	-0.0635303	0.64405	0.909137	no
Pax3	chr1:78101266-78197136	117.357	82.0365	-0.516566	0.0003	0.00326971	yes
St3gal5	chr6:72097607-72154570	117.276	78.2879	-0.583049	5e-05	0.000658218	yes
Rhog	chr7:102239122-102250118	117.216	94.8737	-0.305091	0.025	0.131226	no
Tcn2	chr11:3917077-3932078	117.08	154.495	0.400061	0.0045	0.0336727	yes
Smpdl3a	chr10:57794543-57811830	117.008	84.6052	-0.467787	0.00065	0.006476	yes
Ranbp1	chr16:18239978-18248694	116.991	126.626	0.114173	0.41495	0.781668	no
Mmp14	chr14:54431603-54441258	116.943	119.567	0.0320134	0.81575	0.966165	no
Ctbp1	chr5:33247722-33275004	116.904	109.64	-0.0925439	0.50265	0.843679	no
Crip2	chr12:113140235-113145506	116.83	117.39	0.00689264	0.9592	0.992408	no
Gng12	chr6:66896396-67021361	116.793	110.258	-0.0830674	0.5772	0.884329	no
Cct6a	chr5:129787355-129846443	116.686	126.539	0.11695	0.3869	0.759844	no
Klf6	chr13:5861488-5870393	116.648	145.662	0.320454	0.0364	0.175143	no
Arl8a	chr1:135146833-135156268	116.617	118.166	0.0190364	0.88865	0.979177	no
Mgat5	chr1:127204985-127482972	116.253	87.7049	-0.406537	0.00355	0.0274749	yes
Lamtor1	chr7:101899807-101911903	116.181	118.167	0.0244499	0.8586	0.974907	no
Rab38	chr7:88430272-88491572	116.052	126.771	0.127452	0.3481	0.72587	no
Vapa	chr17:65580052-65613555	115.948	116.776	0.0102605	0.94105	0.989192	no
1810058I24Rik	chr6:35252698-35262059	115.655	125.074	0.112957	0.40195	0.771938	no
Atp13a2	chr4:140986872-141007701	115.603	86.8031	-0.413365	0.00665	0.0461191	yes
Snx3	chr10:42502053-42535369	115.521	116.149	0.00782494	0.9527	0.990793	no
Gltp	chr5:114669499-114690935	115.505	100.102	-0.206488	0.1262	0.420684	no
Sdhc	chr1:171129156-171150603	115.284	110.863	-0.0564086	0.67105	0.917551	no
Cct7	chr6:85446784-85468477	114.924	117.382	0.0305289	0.82975	0.967848	no
Aco2	chr15:81872462-81926213	114.915	108.725	-0.0798864	0.5847	0.886801	no
Ptrf	chr11:100956735-100970617	114.868	97.1195	-0.242147	0.08555	0.324379	no
Tprgl	chr4:154157484-154160684	114.711	116.025	0.016441	0.8997	0.98099	no
Cox7c	chr13:86044797-86046795	114.662	107.512	-0.0928981	0.60165	0.893318	no
Psmb3	chr11:97703433-97713500	114.541	119.095	0.0562534	0.6968	0.928685	no
Dag1	chr9:108204860-108263958	114.441	123.752	0.112837	0.47975	0.831877	no
Sdhd	chr9:50596339-50603849	114.241	95.2174	-0.262781	0.05385	0.234231	no
Cenpb	chr2:131127411-131604824	114.212	100.746	-0.180993	0.38025	0.754841	no
Pianp	chr6:124996719-125003097	114.071	137.183	0.266168	0.05935	0.251029	no
Atp6v0c	chr17:24163864-24169429	114.043	100.539	-0.181831	0.2036	0.554274	no
Ivns1abp	chr1:151344497-151364445	113.396	90.2044	-0.330101	0.02075	0.113626	no
Psmb2	chr4:126677642-126709715	113.354	120.462	0.0877457	0.53525	0.862351	no
Gtf2i	chr5:134237831-134314760	113.346	94.6286	-0.260385	0.08045	0.311706	no
Cdkn1a	chr17:29090985-29100722	113.332	208.829	0.881773	5e-05	0.000658218	yes
Nr4a1	chr15:101266845-101274794	113.237	215.562	0.928762	5e-05	0.000658218	yes
Cltc	chr11:86583864-87555823	112.949	137.588	0.284682	0.21265	0.566124	no
Ndufs7	chr10:79697304-80369637	112.934	115.162	0.0281881	0.9853	0.997084	no
Tfeb	chr17:47737036-47792416	112.906	50.4967	-1.16087	5e-05	0.000658218	yes
Cyba	chr8:122424770-122432940	112.817	121.242	0.103903	0.4692	0.822778	no
2700094K13Rik	chr2:84669220-84670708	112.799	96.7601	-0.221265	0.15015	0.46963	no
Elovl1	chr4:118428092-118437343	112.794	117.133	0.0544456	0.7097	0.934672	no
Arf5	chr6:28423639-28426499	112.719	139.631	0.308887	0.0242	0.128056	no
Psmc1	chr12:100112330-100123364	112.522	142.692	0.3427	0.01255	0.0774333	no
Psmd13	chr7:140882393-140898642	112.443	115.833	0.0428503	0.7482	0.945134	no
Ndufb11	chrX:20615325-20650905	112.44	113.568	0.0143953	0.9324	0.986667	no
Fus	chr7:127967478-127982031	112.308	109.398	-0.0378731	0.78375	0.955899	no
Wbp2	chr11:116078572-116086964	112.303	105.414	-0.0913353	0.5037	0.844192	no
Bax	chr7:45461694-45466898	112.248	121.925	0.11931	0.40015	0.770723	no
Ube2m	chr7:13035119-13038275	111.716	116.445	0.059811	0.66205	0.914069	no
Car14	chr3:95893920-95904639	111.554	24.3405	-2.19632	5e-05	0.000658218	yes
Caprin1	chr2:103762944-103797640	111.503	107.995	-0.0461092	0.77645	0.953648	no
Tecpr1	chr5:144195346-144223578	111.423	139.408	0.323266	0.03215	0.159708	no
Ndufc2	chr7:97400002-97407800	111.334	108.853	-0.0325207	0.8239	0.967427	no
Eml2	chr7:19181169-19206482	111.293	93.8066	-0.2466	0.07185	0.286615	no
Pkp1	chr1:135871394-135919024	110.912	94.7489	-0.227235	0.14315	0.456594	no
Ndufa8	chr2:36036333-36049292	110.81	114.733	0.0501944	0.7291	0.940986	no
Eif3a	chr19:60761115-60790693	110.459	110.141	-0.00416384	0.9791	0.996274	no
Plxnc1	chr10:94790865-94944578	110.438	68.4187	-0.690774	0.0001	0.00122911	yes
2410015M20Rik	chr17:56607451-56609771	110.425	95.6638	-0.207019	0.16175	0.490106	no
Cox17	chr16:38346998-38352763	110.056	130.811	0.249244	0.15975	0.486779	no
Rpn2	chr2:157208547-157326318	110.043	121.037	0.137383	0.3172	0.693994	no
Vegfb	chr19:6982471-6987651	109.891	75.6921	-0.537859	5e-05	0.000658218	yes
Actr1a	chr19:46376813-46395735	109.536	103.756	-0.0781981	0.5682	0.880092	no
S100a4	chr3:90603769-90606045	109.446	705.649	2.68873	5e-05	0.000658218	yes
Asah1	chr8:41340642-41374697	109.262	102.148	-0.0971404	0.474	0.827251	no
Sept2	chr1:93478992-93509732	109.032	109.167	0.00179161	0.9903	0.997694	no
Eif6	chr2:155819836-155826925	108.921	112.758	0.0499487	0.71035	0.934933	no
Sptlc2	chr12:87307888-87388230	108.816	69.1112	-0.654897	5e-05	0.000658218	yes
Psmd4	chr3:95032690-95042614	108.426	119.083	0.135254	0.3194	0.696475	no
Vps25	chr11:101253706-101259547	108.293	111.487	0.0419326	0.7628	0.950552	no
Snx1	chr9:66088126-66124886	108.207	178.369	0.721073	5e-05	0.000658218	yes
Elovl4	chr9:83778691-83806305	108.016	62.5691	-0.787716	5e-05	0.000658218	yes
Mrps21	chr3:95862651-95870619	107.974	121.915	0.175181	0.3506	0.727313	no
Klf4	chr4:55527136-55532475	107.782	159.993	0.569891	0.0001	0.00122911	yes
Atp6ap2	chrX:12587758-12617051	107.735	98.2766	-0.132562	0.329	0.705999	no
Pfdn2	chr1:171345698-171358170	107.624	101.784	-0.0804948	0.61125	0.897831	no
Sf3b2	chr19:5273920-5295455	107.596	94.4672	-0.187733	0.17415	0.510949	no
Glud1	chr14:34310726-34345033	107.41	150.236	0.484105	0.00105	0.00978581	yes
Psen2	chr1:180227003-180256300	107.367	79.1716	-0.439498	0.00135	0.0121266	yes
Nenf	chr1:191306796-191318118	107.181	121.338	0.178979	0.23775	0.602087	no
Dtnbp1	chr13:44922079-45002096	107.178	90.4505	-0.244804	0.0722	0.287826	no
Ier3	chr17:35821712-35822911	107.018	123.147	0.202524	0.1352	0.439595	no
Rpl29	chr9:106429538-106431567	107.002	91.839	-0.220459	0.15695	0.481914	no
Ifitm2	chr7:140954838-140955961	106.74	97.4423	-0.131482	0.4002	0.770723	no
Mbd2	chr18:70568291-70626131	106.508	80.737	-0.399654	0.00305	0.0241471	yes
Rtn3	chr19:7417624-7483291	105.823	108.319	0.0336262	0.8146	0.966126	no
Atraid	chr5:31036035-31054633	105.717	92.9234	-0.186087	0.2327	0.594758	no
Anxa4	chr6:86736839-86793584	105.435	122.307	0.214152	0.1102	0.385033	no
Shisa5	chr9:109038566-109057792	105.433	117.016	0.150385	0.2782	0.657656	no
Lbh	chr17:72918304-72941946	105.39	144.234	0.452675	0.00165	0.0144247	yes
Atp5f1	chr3:105942677-105969760	105.346	110.158	0.0644432	0.7065	0.933527	no
Capza2	chr6:17637097-17666536	105.295	106.088	0.010824	0.93885	0.988752	no
Lgals3bp	chr11:118392751-118401931	105.16	29.9713	-1.81094	5e-05	0.000658218	yes
Ssr2	chr3:88579670-88588413	104.884	110.493	0.0751574	0.5735	0.882396	no
Rps6	chr4:86854098-86857367	104.83	105.725	0.012263	0.9248	0.98474	no
Drap1	chr19:5406814-5424979	104.588	116.96	0.161303	0.24145	0.607737	no
Sptbn1	chr11:30099394-30219772	104.393	155.26	0.572662	0.00215	0.0180095	yes
Prmt1	chr7:44976754-44986420	104.214	98.8924	-0.075611	0.57135	0.881678	no
Anapc13	chr9:102626295-102634244	104.191	92.9806	-0.164224	0.39755	0.767957	no
Glrx5	chr12:105032688-105040910	104.177	85.2946	-0.288505	0.04365	0.200693	no
Bhlhe40	chr6:108577035-108666925	104.121	124.279	0.255323	0.0724	0.288253	no
Puf60	chr15:76070181-76080946	104.119	97.1766	-0.0995466	0.4629	0.818815	no
Olfm1	chr2:28193092-28230736	104.029	116.926	0.168615	0.3078	0.684504	no
Sec61b	chr4:47474660-47483233	104.024	133.727	0.362366	0.0246	0.129785	no
Rap1b	chr10:117814596-117845974	103.755	129.511	0.31989	0.01745	0.099919	no
Rhoc	chr3:104789033-104794459	103.496	216.299	1.06345	5e-05	0.000658218	yes
Add1	chr5:34573713-34632305	103.416	85.8483	-0.268592	0.06	0.252917	no
Eci2	chr13:34977747-34994144	103.395	63.2795	-0.70835	5e-05	0.000658218	yes
Ccnd3	chr17:47505050-47611492	103.265	101.376	-0.0266437	0.8608	0.975799	no
Selk	chr14:29968379-29975074	103.236	107.304	0.0557526	0.68725	0.924693	no
Ociad1	chr5:73292793-73314077	103.153	99.1322	-0.0573627	0.67865	0.920638	no
Pcdhgc3	chr18:36930284-37841872	103.059	79.9045	-0.367128	0.0618	0.258817	no
Mfsd5	chr15:102279455-102281744	102.741	94.8025	-0.116023	0.3784	0.753885	no
Gipc1	chr8:83652677-83664789	102.702	121.828	0.246385	0.0709	0.283829	no
Psmc4	chr7:28041701-28050092	102.631	102.322	-0.00434941	0.97525	0.995518	no
Cct4	chr11:22990592-23003336	102.601	124.513	0.279246	0.0387	0.183718	no
2810428I15Rik	chr8:70504295-70506739	102.495	114.779	0.163299	0.28235	0.660202	no
Fam195b	chr11:120542887-120549727	102.297	106.844	0.0627433	0.6449	0.909749	no
Sdpr	chr1:51218385-51333779	102.156	34.9888	-1.54581	5e-05	0.000658218	yes
Polr2e	chr10:79697304-80369637	102.147	107.635	0.0754967	0.96645	0.993295	no
S100a8	chr3:90669070-90670034	101.863	209.375	1.03946	5e-05	0.000658218	yes
Sqle	chr15:59315091-59331193	101.665	88.2069	-0.204853	0.1476	0.465052	no
Hn1	chr11:115497352-115514370	101.174	113.1	0.160761	0.2344	0.597503	no
Tmem234	chr4:129600706-129607879	100.994	104.811	0.0535269	0.71695	0.936569	no
Rsu1	chr2:13076966-13271415	100.805	132.503	0.394452	0.00355	0.0274749	yes
Rab5b	chr10:128677182-128696268	100.78	87.0464	-0.211353	0.12645	0.42107	no
Derl1	chr15:57869501-57892418	100.501	49.7289	-1.01505	5e-05	0.000658218	yes
Myl12b	chr17:70973962-70990516	100.497	84.155	-0.256035	0.07375	0.29185	no
Mrpl33	chr5:31613950-31622644	100.45	127.801	0.347421	0.0478	0.215152	no
Samm50	chr15:84192232-84214303	100.429	98.7228	-0.0247214	0.8583	0.974907	no
Ndufa9	chr6:126821862-126849144	100.371	102.876	0.0355575	0.79125	0.959286	no
Gabarapl1	chr6:129532183-129542331	100.364	133.439	0.410947	0.0022	0.018354	yes
Tpm1	chr9:67022592-67049213	100.335	202.129	1.01046	5e-05	0.000658218	yes
Pdha1	chrX:159988432-160138336	100.333	115.715	0.205768	0.1529	0.475119	no
Mapk3	chr7:126759625-126765816	100.324	124.619	0.312863	0.0216	0.116991	no
Sdha	chr13:74322254-74350240	100.233	96.6787	-0.0520851	0.7037	0.933072	no
Vps29	chr5:122354412-122363287	100.082	124.116	0.310509	0.0274	0.140788	no
Saraf	chr8:34154562-34170847	99.912	100.562	0.00936168	0.9415	0.989192	no
Epb4.1l4b	chr4:57061725-57143156	99.8697	50.0613	-0.99635	5e-05	0.000658218	yes
Cd164	chr10:41519499-41531042	99.8624	70.8737	-0.494692	0.00035	0.00375207	yes
Sptan1	chr2:29965559-30031450	99.6545	126.22	0.340936	0.0504	0.223932	no
Rab34	chr11:78188426-78192193	99.5053	78.2258	-0.347129	0.01165	0.0731898	no
Ndufs8	chr19:3908862-3912774	99.4502	107.062	0.106402	0.4597	0.816762	no
Nudc	chr4:133532541-133546027	99.4327	97.0281	-0.0353175	0.7985	0.96063	no
Ccdc124	chr8:70868226-70873490	99.3368	99.4529	0.00168498	0.99105	0.998014	no
Ndufa10	chr1:92439718-92473758	99.0785	108.427	0.130086	0.34025	0.718766	no
Arl6ip1	chr7:118118889-118129625	98.9679	78.4742	-0.334742	0.01435	0.0859339	no
Cers4	chr8:4493404-4526079	98.9661	49.9512	-0.986415	5e-05	0.000658218	yes
Rpl31	chr1:39367850-39478747	98.8951	91.155	-0.117577	0.4265	0.79047	no
Adh5	chr3:138437199-138455499	98.5669	95.0225	-0.0528335	0.69715	0.928685	no
Rexo2	chr9:48468513-48480611	98.3851	121.949	0.30977	0.023	0.122911	no
Tex2	chr11:106502138-106612930	98.3571	99.7241	0.0199123	0.89435	0.980903	no
Kdelr1	chr7:45872839-45883726	98.3174	93.4826	-0.0727495	0.5915	0.888969	no
Wls	chr3:159839694-159935175	98.2874	91.6171	-0.101389	0.4541	0.812979	no
Sept8	chr11:53519735-53544096	98.2193	94.4726	-0.056111	0.70295	0.932908	no
Morf4l2	chrX:136732947-136803361	98.2115	125.94	0.358768	0.00795	0.0533178	no
Capn2	chr1:182467258-182517483	98.1731	127.418	0.376166	0.00745	0.0505103	no
Tmem9	chr1:136008218-136035030	97.8323	93.5881	-0.0639854	0.6374	0.907073	no
Cs	chr10:128337831-128362479	97.7954	96.1386	-0.0246499	0.8547	0.974457	no
Map4	chr9:109931773-110083954	97.7338	99.4852	0.0256244	0.86755	0.977265	no
Clic1	chr17:35050242-35058719	97.6297	171.244	0.810663	5e-05	0.000658218	yes
Spcs1	chr14:30999825-31019131	97.5281	101.388	0.0560013	0.82545	0.967427	no
Pttg1ip	chr10:77581766-77598732	97.5141	86.5968	-0.171298	0.2048	0.555606	no
Oat	chr7:132557474-132576398	97.4685	86.9001	-0.165578	0.2203	0.579162	no
Zfp207	chr11:80383278-80405873	97.3938	89.0142	-0.129794	0.34845	0.725903	no
Slc25a39	chr11:102402975-102407517	97.2168	146.6	0.592603	5e-05	0.000658218	yes
Ndufa12	chr10:94199008-94220948	97.1869	99.7323	0.0372988	0.82555	0.967427	no
Gltscr2	chr7:15937835-15946108	97.1108	95.6386	-0.0220387	0.86705	0.977173	no
Prdx4	chrX:155323919-155338454	96.996	92.9018	-0.0622193	0.65775	0.91277	no
Chd4	chr6:125096162-125130501	96.945	93.5529	-0.0513833	0.7419	0.944824	no
Uqcrc2	chr7:120635188-120670343	96.9151	97.6535	0.0109507	0.93585	0.987928	no
Eogt	chr6:97110943-97148883	96.4379	47.8026	-1.01251	5e-05	0.000658218	yes
Vcp	chr4:42979963-43000507	96.3987	92.9737	-0.0521915	0.7033	0.933072	no
Psmc5	chr11:106256184-106263112	96.3751	103.041	0.0964845	0.4761	0.828354	no
Vps35	chr8:85260391-85299497	96.2299	91.5695	-0.0716176	0.60435	0.895061	no
Tppp3	chr8:105467491-105471422	96.2239	160.605	0.739052	5e-05	0.000658218	yes
Lypd3	chr7:24636569-24641118	96.2039	86.7862	-0.14863	0.2933	0.671776	no
Hk1	chr10:62268854-62379908	96.1731	107.397	0.159247	0.277	0.65648	no
Srsf6	chr2:162931507-162937120	95.9282	81.6505	-0.232494	0.0993	0.360097	no
Mrpl30	chr1:37890552-37898333	95.9088	104.892	0.129165	0.3917	0.763931	no
Fkbp9	chr6:56832058-56879360	95.8014	61.3483	-0.643024	5e-05	0.000658218	yes
Tm7sf3	chr6:146602275-146634592	95.7403	86.9012	-0.139749	0.3154	0.691396	no
Nptn	chr9:58582239-58741559	95.6731	97.7881	0.0315463	0.81435	0.966014	no
Bhlhe41	chr6:145858242-145865420	95.6237	72.7948	-0.393532	0.0119	0.0741972	no
4931406C07Rik	chr9:15283336-15357788	95.4149	52.7683	-0.854543	5e-05	0.000658218	yes
Tmem176b	chr6:48833810-48841374	95.4119	55.5653	-0.779984	5e-05	0.000658218	yes
Ddost	chr4:138304737-138312611	95.3746	103.182	0.113516	0.40075	0.770922	no
Tsc22d1	chr14:76415820-76507766	95.2962	122.165	0.358337	0.0165	0.0955368	no
Tkt	chr14:30549130-30574726	95.2537	87.7364	-0.1186	0.39485	0.765886	no
Serp1	chr3:58521970-58557501	95.1899	90.8106	-0.0679477	0.656	0.912688	no
Taf10	chr7:105731729-105744338	95.0354	80.8569	-0.233093	0.54735	0.868678	no
Gtf2h1	chr7:46796093-46823800	95.0314	77.4615	-0.294925	0.02855	0.145433	no
Banf1	chr19:5364632-5371511	95.0225	102.734	0.112578	0.5317	0.861112	no
Nono	chrX:101429650-101448593	94.9969	89.7785	-0.081511	0.54505	0.867802	no
Tfap2a	chr13:40715302-40735162	94.9289	92.4087	-0.0388188	0.78315	0.955857	no
Scly	chr1:91298337-91321080	94.9163	89.9998	-0.0767341	0.5672	0.879474	no
Trappc3	chr4:126262404-126275883	94.8562	90.5061	-0.067727	0.6174	0.901164	no
Fkbp4	chr6:128430106-128438631	94.7128	83.5151	-0.181523	0.1764	0.515012	no
Ube2d3	chr3:135438758-135467178	94.7092	104.481	0.141662	0.2979	0.676055	no
Actr2	chr11:20062303-20112951	94.4817	124.028	0.392563	0.00705	0.0482462	yes
Snx5	chr2:144250123-144270902	94.4186	109.525	0.214123	0.12005	0.407075	no
Cox7b	chrX:106015699-106022450	94.3776	99.1425	0.0710584	0.6091	0.897033	no
Bri3	chr5:144244436-144361005	94.3639	99.2424	0.072721	0.8392	0.969516	no
Nucb1	chr7:45473562-45526268	94.3526	111.318	0.238549	0.1074	0.3783	no
Eif4b	chr15:102073772-102097173	94.3344	97.0212	0.0405167	0.77345	0.952602	no
Snrpe	chr1:133603870-133610280	94.1709	106.538	0.178021	0.3036	0.681571	no
Txndc16	chr14:45134447-45219394	93.9617	113.819	0.276593	0.05905	0.250187	no
Vamp3	chr4:151047304-151057953	93.7044	104.669	0.159647	0.23085	0.592236	no
Atp2a2	chr5:122453512-122502225	93.6718	102.523	0.130264	0.38775	0.760409	no
Pa2g4	chr10:128557765-128565934	93.5568	92.9107	-0.0099965	0.9414	0.989192	no
Nt5c	chr11:115475676-115491814	93.4279	103.118	0.142367	0.3427	0.721414	no
1110008F13Rik	chr2:156863121-156887078	93.3457	102.19	0.130598	0.33975	0.718633	no
Gpr137b	chr13:13357619-13393624	93.2854	146.701	0.653156	5e-05	0.000658218	yes
Hnrnph1	chr11:50377718-50386528	93.2546	99.6035	0.0950213	0.47395	0.827251	no
Stx7	chr10:24149316-24188959	93.0012	107.641	0.210909	0.1244	0.416928	no
Eif5	chr12:111538100-111546753	92.9385	95.5761	0.0403739	0.77505	0.953187	no
Nipal3	chr4:135448900-135494504	92.8026	68.0365	-0.447857	0.00305	0.0241471	yes
U2af2	chr7:5062142-5079945	92.7299	82.4771	-0.169041	0.20325	0.553807	no
Pfdn6	chr17:33938908-33940343	92.7224	89.0041	-0.0590458	0.70665	0.933527	no
Slirp	chr12:87428077-87472299	92.4249	88.82	-0.0573963	0.88065	0.978016	no
Sae1	chr7:16320235-16387896	92.3166	87.3659	-0.0795194	0.5557	0.873633	no
Slc6a17	chr3:107467547-107518018	92.311	139.137	0.591937	0.00035	0.00375207	yes
Ssbp4	chr8:70597489-70608314	92.1941	68.9281	-0.419582	0.00215	0.0180095	yes
H2afz	chr3:137864486-137866922	92.1563	83.1614	-0.148168	0.29195	0.670742	no
Gsto1	chr19:47854988-47864788	92.1114	81.4059	-0.178247	0.1981	0.546735	no
Sulf2	chr2:166073898-166155683	91.9217	123.029	0.420525	0.00385	0.0293935	yes
Mrpl12	chr11:120484668-120488754	91.7588	94.9798	0.0497751	0.73065	0.941356	no
Pgp	chr17:24470472-24471596	91.6815	82.0437	-0.160239	0.25605	0.628796	no
Mbd3	chr10:80392538-80399531	91.6624	93.3744	0.0266968	0.8447	0.971263	no
Hsbp1	chr8:119344537-119348929	91.5161	86.7167	-0.0777166	0.57715	0.884329	no
Eif4a3	chr11:119288362-119300043	91.402	83.2681	-0.134461	0.3128	0.689226	no
Rbm39	chr2:156147240-156180238	91.3394	93.3865	0.0319761	0.81345	0.966014	no
Pcna	chr2:132249285-132253180	91.2277	95.413	0.0647136	0.64525	0.909923	no
Surf4	chr2:26913377-26933511	91.2021	101.134	0.149125	0.3494	0.726245	no
Ncl	chr1:86344718-86359455	91.0367	85.8624	-0.0844206	0.6062	0.895492	no
Commd1	chr11:22899727-22982284	90.8946	85.8009	-0.0832019	0.65895	0.913173	no
Commd4	chr9:57155040-57158299	90.8587	100.469	0.145058	0.3202	0.697484	no
Tmed10	chr12:85340613-85374717	90.8038	97.1877	0.0980219	0.48275	0.833963	no
Uqcrfs1	chr13:30540311-30545316	90.7443	103.796	0.193866	0.15085	0.471107	no
H1f0	chr15:79028211-79030500	90.7378	106.943	0.237065	0.08095	0.312862	no
Rpl21	chr5:146832889-146837032	90.7306	89.0334	-0.0272428	0.83995	0.969516	no
Sec11a	chr7:80915378-80947550	90.7287	131.352	0.533802	5e-05	0.000658218	yes
Ldb1	chr19:46032600-46045211	90.649	76.1239	-0.251942	0.0628	0.261435	no
Dst	chr1:33908224-34308662	90.6119	99.1094	0.129322	0.5973	0.892242	no
Tmem147	chr7:30727700-30729534	90.4509	88.8738	-0.0253767	0.86155	0.976292	no
Appl2	chr10:83600033-83648664	90.4139	50.6797	-0.835136	5e-05	0.000658218	yes
Stt3a	chr9:36732412-36767578	90.3427	99.5799	0.140447	0.3038	0.681571	no
Hspe1	chr1:55088147-55091317	90.2894	97.2904	0.10774	0.4682	0.822419	no
Lrrfip1	chr1:90998726-91128944	90.1422	127.343	0.498447	0.0008	0.00771655	yes
Atp6v1a	chr16:44085403-44139019	90.0271	91.9553	0.0305725	0.8275	0.96771	no
Bscl2	chr19:8836928-8848683	89.8387	85.8027	-0.0663142	0.6278	0.904644	no
Epdr1	chr13:19591707-19619830	89.7218	94.2001	0.0702705	0.60805	0.89687	no
Erp29	chr5:121444752-121452474	89.6993	96.3678	0.103454	0.4473	0.80756	no
Ndufb2	chr6:39592582-39599471	89.5737	94.9749	0.08447	0.65165	0.91188	no
Tbrg1	chr9:37649181-37657312	89.4757	89.2203	-0.0041233	0.9778	0.99595	no
Enpp2	chr15:54838678-54920146	89.405	14.9002	-2.58502	5e-05	0.000658218	yes
Tomm6	chr17:47686644-47694736	89.3891	80.4457	-0.152083	0.3	0.678361	no
Tm9sf2	chr14:122107081-122159603	89.2406	76.8035	-0.216528	0.11385	0.393248	no
Serpinb6a	chr13:33917917-34002794	89.1995	160.065	0.843552	5e-05	0.000658218	yes
Hsp90aa1	chr12:110691035-110696395	89.1295	93.3248	0.0663573	0.62605	0.904327	no
Runx3	chr4:135120644-135177990	89.0611	68.8371	-0.37161	0.0074	0.0502261	no
Cdc37	chr9:21138540-21149906	88.9917	92.3334	0.0531814	0.69545	0.928581	no
Acaa2	chr18:74779211-74806207	88.9097	66.8144	-0.412181	0.0024	0.0197309	yes
Krtcap2	chr3:89246437-89249722	88.82	107.733	0.278502	0.10335	0.369737	no
Dcaf6	chr1:165329500-165460463	88.7177	55.7143	-0.671173	5e-05	0.000658218	yes
Pgls	chr8:71592183-71596267	88.6995	86.5217	-0.0358634	0.8025	0.961938	no
Etfb	chr7:43444071-43457800	88.6692	86.1576	-0.0414547	0.773	0.952516	no
Becn1	chr11:101279202-101302267	88.5444	80.1393	-0.143892	0.27975	0.658539	no
Fosb	chr7:19302695-19310045	88.4933	63.6278	-0.475911	0.0008	0.00771655	yes
Nxf1	chr19:8757102-8770910	88.4578	75.4907	-0.228691	0.11755	0.401338	no
Eef1d	chr15:75894795-75909556	88.2759	87.4846	-0.0129907	0.92195	0.984349	no
Lrp10	chr14:54464146-54470291	88.2574	101.204	0.197476	0.15585	0.480269	no
Asna1	chr8:85017930-85025278	88.2537	98.4536	0.157787	0.25085	0.621071	no
Psat1	chr19:15905122-15925059	88.2313	69.4814	-0.344665	0.0104	0.0666868	no
Abhd12	chr2:150832514-150904731	88.2217	79.7828	-0.145056	0.2738	0.652992	no
Abcd3	chr3:121758909-121815215	88.1858	61.2855	-0.525002	0.00015	0.00177006	yes
Cops7a	chr6:124958410-124965529	88.1198	88.5798	0.00751156	0.95585	0.991771	no
Tmbim4	chr10:120208825-120224897	88.1152	82.1932	-0.100372	0.504	0.844353	no
Gpm6b	chrX:166238942-166389033	88.0811	89.9034	0.0295435	0.8451	0.971306	no
Ech1	chr7:28825337-28832239	88.0562	84.2065	-0.0644945	0.6457	0.909923	no
Cyp2j6	chr4:96516137-96553651	87.8206	86.0416	-0.029526	0.82975	0.967848	no
Mdh1	chr11:21556691-21571934	87.6253	93.3919	0.0919506	0.4992	0.841879	no
Psmd7	chr8:107580379-107588482	87.5227	83.1618	-0.0737366	0.58005	0.885667	no
Dhcr7	chr7:143823166-143848410	87.4594	96.703	0.144947	0.28345	0.661543	no
Stx4a	chr7:127841807-127848965	87.4113	154.267	0.819539	5e-05	0.000658218	yes
H2afj	chr6:136808247-136810074	87.3936	75.1532	-0.217694	0.1081	0.379942	no
Papss1	chr3:131564767-131643671	87.3361	56.7976	-0.620748	5e-05	0.000658218	yes
Ppp2r4	chr2:30416049-30447807	87.3111	84.9175	-0.0401032	0.76265	0.950461	no
Srrm2	chr17:23803186-23829109	87.2613	83.6269	-0.061374	0.73395	0.942024	no
Zfand3	chr17:30005086-30210020	87.1526	79.9336	-0.12474	0.3589	0.735819	no
Psmd3	chr11:98682553-98695978	87.0356	95.0112	0.126492	0.34275	0.721414	no
Polr2f	chr15:79141366-79151767	87.0062	84.3491	-0.0447448	0.8039	0.962414	no
Aup1	chr6:83034223-83057682	86.9179	99.967	0.2018	0.2367	0.600285	no
Atp9a	chr2:168634437-168742136	86.7874	90.7901	0.0650501	0.63995	0.907968	no
Rpl26	chr11:68901565-68904534	86.7487	82.2281	-0.0772108	0.83935	0.969516	no
Hspd1	chr1:55077833-55087932	86.7342	92.2458	0.0888817	0.50275	0.843679	no
1110008P14Rik	chr2:32379100-32381915	86.4287	84.656	-0.0298987	0.85825	0.974907	no
Maz	chr7:127022136-127026479	86.3722	71.8405	-0.265769	0.04795	0.215661	no
Fam162a	chr16:36043843-36071515	86.3558	92.9072	0.105496	0.5141	0.850598	no
Calm3	chr7:16915378-16924032	86.1908	107.781	0.322491	0.01775	0.10117	no
Mrps18c	chr5:100798758-100804467	86.1542	95.5843	0.149852	0.39595	0.766462	no
Gns	chr10:121365089-121397245	86.091	97.3809	0.177775	0.205	0.55577	no
Psme1	chr14:55578493-55585254	86.0545	66.3189	-0.37583	0.01845	0.104108	no
Nars	chr18:64499646-64516557	85.8828	104.442	0.282258	0.0394	0.186328	no
Rab1	chr11:20201601-20226856	85.5215	96.2579	0.170618	0.2085	0.561214	no
Dync1h1	chr12:110601394-110666944	85.486	95.5559	0.160656	0.41585	0.782127	no
Ccser2	chr14:36874935-36968764	85.4709	54.0991	-0.65983	5e-05	0.000658218	yes
2410006H16Rik	chr11:62602876-62604806	85.353	99.6283	0.223114	0.2409	0.606722	no
Sprr1b	chr3:92436808-92438779	85.3442	90.0273	0.0770693	0.6218	0.903021	no
Trf	chr9:103208875-103230286	85.3391	142.72	0.74191	5e-05	0.000658218	yes
Vps28	chr15:76622085-76626084	85.3352	81.9773	-0.0579172	0.68445	0.922859	no
Tex261	chr6:83770413-83775812	85.1368	85.1243	-0.000212807	0.99915	0.999442	no
Sec61a1	chr6:88503606-88518800	84.9695	105.122	0.307046	0.02835	0.145009	no
Emc7	chr2:112455024-112467436	84.8289	106.695	0.330867	0.01825	0.10345	no
Tmem51	chr4:142030992-142088101	84.7446	87.1903	0.041046	0.76645	0.95143	no
Srebf2	chr15:82147268-82204960	84.618	80.5497	-0.071086	0.6217	0.903021	no
Trim28	chr7:13024151-13031032	84.5912	78.9783	-0.0990512	0.46845	0.822421	no
Snhg3	chr4:132351932-132353686	84.5533	87.2556	0.0453871	0.82	0.967427	no
Ptgr1	chr4:58965589-58987078	84.5237	42.2796	-0.999395	5e-05	0.000658218	yes
Mat2a	chr6:72432798-72440615	84.5224	92.1601	0.12481	0.36725	0.742878	no
Epn1	chr7:5080234-5098178	84.4562	76.3909	-0.144802	0.2823	0.660202	no
Rnf10	chr5:115241769-115272895	84.4092	98.3108	0.219949	0.11055	0.385671	no
Cpe	chr8:64592550-64693040	84.2547	584.339	2.79398	5e-05	0.000658218	yes
Sirt2	chr7:28766751-28788665	84.114	81.6918	-0.0421543	0.76155	0.949691	no
Rpl22	chr4:152324435-152334082	83.8927	83.9338	0.000706841	0.9958	0.998962	no
Nhp2	chr11:51619772-51635896	83.8648	101.006	0.268303	0.16935	0.502825	no
Actr3	chr1:125392904-125435727	83.8476	139.543	0.734871	5e-05	0.000658218	yes
Psma4	chr9:54950256-54958030	83.7464	93.7181	0.1623	0.24575	0.614573	no
Tmem160	chr7:16452778-16455490	83.7462	70.828	-0.241704	0.11775	0.4018	no
Ndufa13	chr8:69894181-69903518	83.742	71.2437	-0.233189	0.09385	0.346536	no
Pacs2	chr12:113014507-113074401	83.6986	44.9316	-0.897472	5e-05	0.000658218	yes
Dctn3	chr4:41714797-41723163	83.6464	95.5029	0.19124	0.1765	0.51504	no
Cndp2	chr18:84667464-84685702	83.6338	76.4336	-0.12988	0.3364	0.714713	no
Kctd12	chr14:102976580-102982637	83.5539	57.4021	-0.541604	0.00025	0.00280352	yes
Tomm40	chr7:19701312-19715429	83.5079	86.8231	0.0561667	0.67715	0.920114	no
Txnl4a	chr18:80206797-80225851	83.5058	88.2128	0.0791113	0.5812	0.885822	no
Rab10	chr12:3235790-3309969	83.498	99.6393	0.254972	0.07065	0.283193	no
Tor1aip2	chr1:156004598-156068859	83.3888	107.05	0.360364	0.04365	0.200693	no
Ndufb5	chr3:32737062-32751559	83.1772	73.2949	-0.182477	0.21435	0.568942	no
5031439G07Rik	chr15:84945719-84987971	83.0818	83.9174	0.0144369	0.92215	0.984349	no
Ndufv2	chr17:66078794-66101559	83.0036	76.0233	-0.126732	0.34045	0.718766	no
Gorasp2	chr2:70661508-70691725	82.995	95.5595	0.203374	0.1332	0.435421	no
Mtmr2	chr9:13749180-13806481	82.9877	73.5534	-0.174106	0.1927	0.538992	no
Stub1	chr17:25829042-25833361	82.944	90.5145	0.126011	0.3797	0.754841	no
Prr13	chr15:102459169-102462806	82.9261	106.557	0.361732	0.0084	0.055853	no
Eif3d	chr15:77958997-77970824	82.9203	90.6561	0.128678	0.3338	0.711625	no
Snd1	chr6:28480347-28888832	82.8325	112.629	0.443309	0.00165	0.0144247	yes
Ier2	chr8:84661330-84662852	82.7339	82.2343	-0.00873847	0.9494	0.990262	no
Rab2a	chr4:8535643-8607702	82.685	86.9124	0.071937	0.58745	0.888096	no
Sec13	chr6:113728051-113740681	82.6665	90.6347	0.132761	0.33225	0.709768	no
Tmem259	chr10:79697304-80369637	82.661	78.8821	-0.0675084	0.8514	0.973909	no
Acot1	chr12:84009501-84017669	82.6125	36.6914	-1.17092	5e-05	0.000658218	yes
Acly	chr11:100476351-100528000	82.6088	83.8841	0.022101	0.87905	0.977855	no
Sorbs3	chr14:70180467-70207671	82.3015	32.5361	-1.33888	5e-05	0.000658218	yes
Txn2	chr15:77915050-77928994	82.1635	85.5467	0.0582139	0.66825	0.916141	no
Sgta	chr10:81044072-81060154	82.1317	73.3355	-0.163426	0.22515	0.585733	no
Psmc2	chr5:21785282-21803784	82.0962	83.26	0.020308	0.88555	0.978329	no
Tubb2b	chr13:34127007-34130354	82.0676	84.7116	0.0457471	0.727	0.940067	no
Actr1b	chr1:36699201-36709925	81.8465	97.8142	0.257123	0.05505	0.237618	no
Bak1	chr17:27018034-27036378	81.7968	82.2915	0.00869879	0.9508	0.990592	no
Dnajc8	chr4:132535558-132553742	81.7752	74.0207	-0.143735	0.2916	0.670604	no
Clcn7	chr17:25133393-25162099	81.6691	80.1457	-0.0271652	0.8442	0.971263	no
Eif3e	chr15:43250039-43282736	81.6299	96.3349	0.238961	0.07245	0.288267	no
Fam53b	chr7:132712083-132813196	81.5902	38.9455	-1.06694	5e-05	0.000658218	yes
Sdf4	chr4:155992842-156013610	81.5533	74.6849	-0.126927	0.51665	0.852318	no
Ctsh	chr9:90054266-90076095	81.5231	42.4198	-0.942471	5e-05	0.000658218	yes
Scrn1	chr6:54508815-54566382	81.5012	40.867	-0.995885	5e-05	0.000658218	yes
Rragc	chr4:123917432-123936997	81.4612	89.648	0.138158	0.31405	0.690143	no
Polr2j	chr5:136116690-136122947	81.2657	89.2395	0.135036	0.421	0.787279	no
Ik	chr18:36744655-36757639	81.1904	72.2904	-0.167506	0.21135	0.564856	no
Ssb	chr2:69861561-69885615	81.1526	90.0435	0.149984	0.2868	0.665608	no
Trim29	chr9:43310762-43336125	81.031	75.1327	-0.109033	0.41695	0.782703	no
Slc39a6	chr18:24579880-24603817	81.0242	107.17	0.403476	0.00455	0.0339854	yes
Atp6v1d	chr12:78842981-78861638	80.9349	89.1508	0.139485	0.3022	0.68133	no
Bin3	chr14:70100144-70153791	80.5403	125.226	0.636752	5e-05	0.000658218	yes
Gars	chr6:55038000-55079504	80.5293	95.2367	0.242004	0.07245	0.288267	no
Abat	chr16:8513428-8621567	80.4907	21.2789	-1.9194	5e-05	0.000658218	yes
Prnp	chr2:131909927-131956131	80.4296	86.1804	0.0996339	0.46615	0.821113	no
Fam89b	chr19:5728086-5729666	80.3643	78.3402	-0.0368006	0.793	0.959825	no
Kars	chr8:111993438-112011354	80.3239	78.2508	-0.0377238	0.7776	0.954149	no
Rhbdf1	chr11:32209584-32222293	80.1717	58.5004	-0.454646	0.00065	0.006476	yes
Timm13	chr10:80879815-80900969	79.9383	73.3455	-0.124178	0.3784	0.753885	no
Clptm1l	chr13:73604001-73620639	79.937	79.5742	-0.00656139	0.9614	0.992408	no
Magoh	chr4:107879754-107887424	79.7893	69.3125	-0.203078	0.21695	0.573025	no
Man2b1	chr8:85083268-85098739	79.7313	65.8712	-0.275499	0.05165	0.227855	no
Rell1	chr5:63908897-63968897	79.6416	72.2717	-0.140092	0.3099	0.686066	no
Ufc1	chr1:171288563-171294982	79.5587	78.6664	-0.0162725	0.91195	0.981896	no
Idh3b	chr2:130274411-130284451	79.5482	80.4991	0.0171439	0.9362	0.987928	no
Cpne4	chr9:104569787-105034544	79.5234	37.5811	-1.08137	5e-05	0.000658218	yes
Pi4k2b	chr5:52741573-52769344	79.4419	74.8574	-0.0857558	0.5271	0.858041	no
Atp5g1	chr11:96072792-96075694	79.3691	88.3136	0.154057	0.3068	0.68413	no
Csde1	chr3:103020545-103058189	79.3216	90.3302	0.187495	0.1835	0.525891	no
Tuba4a	chr1:75210828-75219253	79.2995	65.853	-0.268062	0.1052	0.372916	no
Arl1	chr10:88731413-88743202	79.2656	78.5917	-0.0123192	0.93425	0.987571	no
Ywhah	chr5:33018815-33027966	79.1999	118.795	0.584908	0.00025	0.00280352	yes
Lrrc59	chr11:94629823-94653754	79.0085	103.448	0.388824	0.00535	0.0389988	yes
Dusp4	chr8:34807609-34819894	78.8355	60.5974	-0.379589	0.0064	0.0448614	yes
Tpm3	chr3:90072650-90100902	78.7629	93.6561	0.249857	0.06825	0.276249	no
Epb4.1l2	chr10:25359797-25523518	78.7008	62.2981	-0.337189	0.0154	0.0906475	no
Ppp1r14b	chr19:6975047-6977324	78.6896	91.7353	0.221304	0.13495	0.439242	no
1110007C09Rik	chr13:49202950-49216026	78.6647	109.833	0.481523	0.001	0.00936199	yes
Arf4	chr14:26638196-26657258	78.418	100.391	0.356367	0.0081	0.0541775	no
Smap1	chr1:23761925-23922381	78.4127	66.2332	-0.243533	0.08135	0.313822	no
Dbnl	chr11:5788482-5800980	78.3918	93.3032	0.251224	0.0689	0.277974	no
Tomm22	chr15:79670867-79672862	78.3588	76.2309	-0.0397178	0.7826	0.95575	no
Abracl	chr10:18011259-18023252	78.2839	112.812	0.52713	0.00045	0.00470227	yes
Loxl2	chr14:69609475-69695834	78.2696	30.8749	-1.34202	5e-05	0.000658218	yes
Psma1	chr7:114264549-114276116	78.1892	79.8759	0.0307903	0.82345	0.967427	no
Aamp	chr1:74279839-74284738	78.1834	82.601	0.0792978	0.55055	0.869722	no
Sidt2	chr9:45937856-45955249	77.9427	78.9905	0.0192666	0.89035	0.979297	no
Rpn1	chr6:88084472-88105304	77.8925	86.9399	0.158535	0.24945	0.619087	no
Arglu1	chr8:8666575-8690537	77.7841	67.8932	-0.196207	0.14535	0.46077	no
Tmem109	chr19:10870660-10881743	77.7742	68.6036	-0.181008	0.17715	0.515891	no
Ssr3	chr3:65379656-65392553	77.5789	86.6943	0.160274	0.2422	0.609254	no
Wbp5	chrX:136245079-136247139	77.4875	100.238	0.371389	0.01005	0.0648782	no
Dlst	chr12:85110832-85134091	77.4107	79.3437	0.0355823	0.7912	0.959286	no
Arpc1a	chr5:145083868-145108756	77.4099	76.155	-0.0235793	0.86135	0.976155	no
Plgrkt	chr19:29348676-29361871	77.3884	63.2946	-0.290034	0.0661	0.270305	no
Tln1	chr4:43531512-43562583	77.3763	120.468	0.63868	0.00035	0.00375207	yes
Rab14	chr2:35180204-35201120	77.3092	82.5578	0.0947655	0.48475	0.834444	no
Polr2g	chr19:8793128-8798557	77.2718	81.1106	0.0699476	0.64135	0.908457	no
Snx17	chr5:31193303-31198900	77.1747	68.4417	-0.173251	0.1983	0.546988	no
Rrbp1	chr2:143947394-144011263	77.1213	101.406	0.394944	0.00895	0.058817	no
Lonp1	chr17:56614297-56626903	77.1184	67.3282	-0.195864	0.1483	0.466547	no
Pgd	chr4:149149984-149166707	77.1089	63.1865	-0.287282	0.034	0.166631	no
Nudt3	chr17:27579381-27623452	77.0493	72.8135	-0.0815765	0.54465	0.867721	no
Gjb2	chr14:57098601-57104702	77.0325	58.0636	-0.407832	0.00545	0.0395651	yes
Cyth3	chr5:143622446-143710248	76.9762	52.3184	-0.557094	5e-05	0.000658218	yes
Mapk1	chr16:16983381-17047453	76.9645	88.6724	0.204292	0.198	0.54658	no
Map1lc3b	chr8:121590467-121598047	76.9263	81.5947	0.0849989	0.5262	0.857588	no
Ccni	chr5:93181932-93206495	76.9035	77.5904	0.0128298	0.9239	0.984658	no
Emc4	chr2:112266313-112368027	76.8552	82.5591	0.103284	0.6031	0.894063	no
Fgfbp1	chr5:43978857-43981799	76.8052	60.8297	-0.336427	0.02115	0.115055	no
Capg	chr6:72544390-72562983	76.8035	202.143	1.39613	5e-05	0.000658218	yes
Hist1h1c	chr13:23738806-23739531	76.6816	133.134	0.795929	5e-05	0.000658218	yes
Cystm1	chr18:36348623-36393370	76.6226	66.4761	-0.204934	0.2494	0.619087	no
Cirbp	chr10:79697304-80369637	76.6028	57.3445	-0.417743	0.81955	0.967336	no
Hdlbp	chr1:93405939-93478917	76.5563	88.6713	0.211947	0.15795	0.484026	no
Nrbp2	chr15:76085593-76090013	76.526	49.0959	-0.640347	5e-05	0.000658218	yes
Psmd6	chr14:14112184-14120904	76.4725	83.617	0.128855	0.3464	0.724307	no
Hsd17b10	chrX:152001895-152004442	76.3766	56.1533	-0.44376	0.0043	0.0323909	yes
Sdr16c6	chr4:4056665-4077514	76.3635	43.5419	-0.81048	5e-05	0.000658218	yes
Sf3b5	chr10:13008449-13009183	76.2571	75.1324	-0.0214369	0.8946	0.980903	no
Qars	chr9:108508004-108515941	76.1708	78.8011	0.0489772	0.71695	0.936569	no
Copz1	chr15:103272917-103299864	76.153	81.0489	0.0898923	0.5078	0.846947	no
Mapkapk2	chr1:131053703-131097543	76.1251	76.5625	0.00826475	0.9501	0.990441	no
Ecm1	chr3:95734147-95739569	76.0579	182.426	1.26214	5e-05	0.000658218	yes
Rassf1	chr9:107551554-107562267	75.9945	115.511	0.604067	5e-05	0.000658218	yes
Txndc17	chr11:72207553-72210487	75.8541	79.4236	0.0663412	0.62585	0.904321	no
Fkbp2	chr19:6977738-6980461	75.8493	87.688	0.209244	0.20795	0.560341	no
Paics	chr5:76913248-76967505	75.7849	67.916	-0.15816	0.2974	0.675929	no
Serbp1	chr6:67266978-67289302	75.7483	74.4398	-0.0251392	0.87185	0.977494	no
Snx15	chr19:6119403-6128215	75.746	84.4076	0.156204	0.247	0.615838	no
Tex264	chr9:106658745-106685952	75.7388	86.5249	0.192083	0.1594	0.486223	no
Ykt6	chr11:5955757-5967781	75.7089	75.3546	-0.00676758	0.9589	0.992408	no
Fam173a	chr17:25786579-25792394	75.6492	67.0069	-0.175015	0.2471	0.615964	no
S100a16	chr3:90541222-90543151	75.625	66.1189	-0.1938	0.199	0.547272	no
Ndufa5	chr6:24518665-24527687	75.594	69.9153	-0.112665	0.5415	0.865833	no
Sar1a	chr10:61680320-61693297	75.4185	89.5061	0.247066	0.06975	0.280855	no
Ist1	chr8:109614516-109693294	75.3915	78.2573	0.0538246	0.6883	0.925236	no
Tpd52	chr3:8929435-9004515	75.3227	66.5341	-0.178992	0.1889	0.533198	no
Acadm	chr3:153922352-153944643	75.2746	62.9748	-0.257388	0.05525	0.238316	no
Erbb3	chr10:128569367-128589501	75.2723	65.0228	-0.211174	0.1229	0.413352	no
Dnajb11	chr16:22857844-22899451	75.2556	92.2805	0.294228	0.03305	0.163134	no
Arpc4	chr6:113378112-113414571	75.1725	103.449	0.460641	0.0008	0.00771655	yes
Immt	chr6:71831319-71875266	75.1669	80.2414	0.0942493	0.4943	0.839975	no
Socs3	chr11:117966086-117969366	75.1187	66.8955	-0.167262	0.21375	0.567835	no
Acadl	chr1:66830838-66863309	75.011	82.7456	0.141582	0.2875	0.666236	no
St6gal1	chr16:23224739-23360350	74.9332	54.439	-0.460965	0.0009	0.00853522	yes
Plp2	chrX:7657378-7671278	74.9248	103.585	0.467305	0.0033	0.0257974	yes
Syngr2	chr11:117809666-117814286	74.8359	80.1069	0.0981955	0.4675	0.821771	no
Stfa1	chr16:36277147-36285371	74.8042	120.253	0.684885	0.001	0.00936199	yes
Fam174b	chr7:73740306-73776919	74.6714	109.451	0.551652	0.0002	0.00229676	yes
Egr1	chr18:34861206-34864956	74.5479	58.3206	-0.354162	0.0089	0.0585504	no
Cltb	chr13:54592938-54611272	74.5171	89.1631	0.258875	0.0555	0.238979	no
Hnrnpa1	chr15:103240396-103246698	74.4895	68.1144	-0.129079	0.4501	0.809789	no
Lsm8	chr6:18848634-18854052	74.4765	67.0385	-0.151795	0.3466	0.724324	no
Dpm3	chr3:89266460-89267079	74.434	79.818	0.100752	0.5963	0.891957	no
Atp6v0d2	chr4:19876837-19922566	74.3262	80.5226	0.115524	0.3907	0.763442	no
Npc1	chr18:12168729-12236386	74.2738	54.8033	-0.43859	0.0037	0.0284584	yes
Chchd10	chr10:75935572-75940672	74.246	122.428	0.721551	5e-05	0.000658218	yes
Commd3	chr2:18672461-18676216	74.2296	78.8091	0.0863671	0.5656	0.879183	no
Ddx1	chr12:13219306-13249174	74.2026	75.029	0.0159787	0.90985	0.981557	no
Mien1	chr11:98412483-98438988	74.1835	84.5959	0.18949	0.3552	0.732954	no
Cttn	chr7:143948404-144470935	74.1325	98.6311	0.411936	0.0025	0.0203775	yes
Vimp	chr7:66079648-66089405	74.0938	96.4332	0.380178	0.00655	0.0455783	yes
Ensa	chr3:95624979-95632117	74.0887	81.3179	0.134319	0.3553	0.732964	no
Mical1	chr10:41476313-41487030	74.0495	90.1675	0.284118	0.0417	0.19461	no
Ran	chr5:129020155-129024321	74.0424	86.1972	0.219289	0.1043	0.371281	no
Sypl	chr12:32953944-32979502	73.9494	55.8945	-0.403832	0.00365	0.0281261	yes
Csnk1g2	chr10:80622779-80640771	73.9416	67.9009	-0.122956	0.37115	0.746489	no
Imp3	chr9:56937499-56938398	73.819	70.4292	-0.067817	0.6515	0.91188	no
Sept7	chr9:25252438-25308571	73.802	88.842	0.267582	0.0483	0.216539	no
Cwc15	chr9:14500618-14510620	73.8019	82.901	0.167733	0.22975	0.590867	no
Rab6a	chr7:100549116-100641268	73.6143	74.7646	0.0223685	0.8753	0.977596	no
Cdk16	chrX:20688492-20699877	73.569	61.8882	-0.249434	0.06705	0.272904	no
Bop1	chr15:76380512-76477269	73.4355	58.9436	-0.317142	0.0914	0.33939	no
Gpm6a	chr8:54779433-55060878	73.4073	70.7268	-0.0536679	0.6969	0.928685	no
Hnrnpul1	chr7:25722038-25754720	73.3732	62.8709	-0.222862	0.0959	0.351596	no
Trappc1	chr11:69323985-69325793	73.3661	77.7988	0.0846332	0.5924	0.88995	no
Cib1	chr7:80227155-80232805	73.2923	70.6811	-0.052337	0.7182	0.936778	no
Cadm1	chr9:47530351-47853385	73.0525	43.0974	-0.761334	5e-05	0.000658218	yes
Kpnb1	chr11:97159709-97187892	73.036	81.6509	0.16086	0.27285	0.651878	no
Ndufs3	chr2:90894635-90904721	72.955	70.5541	-0.0482765	0.74595	0.944824	no
Gnai3	chr3:108107274-108146152	72.871	75.3905	0.0490375	0.71405	0.935636	no
Chchd3	chr6:32792226-33060152	72.8306	90.6326	0.315485	0.02135	0.115889	no
Chmp3	chr6:71543853-71581574	72.7254	72.7798	0.00107908	0.99385	0.998962	no
Ubl7	chr9:57910985-57929968	72.6894	48.1473	-0.59429	5e-05	0.000658218	yes
Mtpn	chr6:35508823-35539888	72.683	70.824	-0.0373789	0.7813	0.955097	no
Rtcb	chr10:85938636-85957793	72.6766	72.1024	-0.0114433	0.9308	0.986422	no
Rnf181	chr6:72355482-72362381	72.6316	89.9403	0.30837	0.0632	0.262572	no
Ppp1r37	chr7:19530966-19562398	72.5959	57.0907	-0.346634	0.01045	0.0669382	no
Syf2	chr4:134930979-134937537	72.5825	70.1395	-0.0493945	0.72215	0.938097	no
Ssu72	chr4:155704814-155733873	72.5732	84.064	0.212052	0.11325	0.392048	no
Wdr83os	chr8:85080962-85082339	72.5305	72.4164	-0.00227176	0.9879	0.997084	no
1810037I17Rik	chr3:122924396-122926194	72.5059	71.7325	-0.0154715	0.9146	0.982435	no
Pink1	chr4:138313409-138326296	72.4595	40.167	-0.851164	5e-05	0.000658218	yes
Rab32	chr10:10545038-10558207	72.4272	66.7493	-0.117779	0.3801	0.754841	no
Tacc1	chr8:25154551-25201542	72.3449	59.9496	-0.271143	0.07355	0.29143	no
Dync1i2	chr2:71211705-71263302	72.3124	80.3785	0.152566	0.26135	0.635534	no
Copa	chr1:172066012-172122332	72.2533	75.7269	0.0677432	0.7034	0.933072	no
Fam50a	chrX:74313032-74320149	72.2386	74.5767	0.0459551	0.7428	0.944824	no
Taf1d	chr9:15283336-15357788	72.1777	69.2555	-0.0596248	0.84085	0.969664	no
Cdh13	chr8:118283754-119323448	72.1152	168.699	1.22608	5e-05	0.000658218	yes
Os9	chr10:127094258-127121160	72.0298	68.3108	-0.0764801	0.5845	0.886682	no
Pld3	chr7:27532017-27553112	72.0296	77.762	0.110474	0.3999	0.770385	no
Tmem55a	chr4:14864218-14915260	71.9044	57.8665	-0.313352	0.0211	0.114884	no
Coa3	chr11:101277969-101278948	71.8906	65.7041	-0.129819	0.4296	0.792942	no
Polr2m	chr9:71478436-71485983	71.8673	66.1905	-0.118711	0.38235	0.756512	no
Slc38a2	chr15:96687391-96699698	71.8666	74.3692	0.0493856	0.7298	0.941076	no
Pgrmc1	chrX:36598224-36606079	71.8025	80.9451	0.17291	0.2016	0.552464	no
Psmb5	chr14:54614119-54617995	71.7575	75.866	0.080324	0.59115	0.888841	no
Bag6	chr17:35135177-35147322	71.73	71.4623	-0.005395	0.9693	0.994259	no
Ttc3	chr16:94358762-94469221	71.6928	54.1683	-0.404381	0.00825	0.0550325	no
Ppt2	chr17:34616661-34628279	71.6801	68.5811	-0.0637619	0.6418	0.908784	no
Fa2h	chr8:111345137-111393821	71.5849	39.0179	-0.875519	5e-05	0.000658218	yes
Trappc6a	chr7:19508728-19516145	71.5103	61.8277	-0.209898	0.19715	0.545204	no
Set	chr2:30061995-30072577	71.3936	69.7953	-0.0326647	0.809	0.964766	no
Fam213a	chr14:40993739-41013775	71.3314	61.8685	-0.205331	0.13585	0.440669	no
Anp32a	chr9:62341342-62378805	71.2713	62.4712	-0.190131	0.1529	0.475119	no
Stat3	chr11:100886809-100939511	71.1321	82.8999	0.220869	0.11755	0.401338	no
Fermt2	chr14:45458791-45530065	71.0659	109.137	0.618907	5e-05	0.000658218	yes
Dctn1	chr6:83165923-83200118	70.7625	71.0996	0.00685597	0.9604	0.992408	no
Max	chr12:76937268-76962248	70.6953	58.2699	-0.278864	0.03965	0.187083	no
Acox1	chr11:116171882-116215318	70.6746	67.0454	-0.0760539	0.5984	0.892242	no
Creg1	chr1:165763779-165775304	70.647	42.5217	-0.732429	5e-05	0.000658218	yes
Cox14	chr15:99725617-99728136	70.6069	84.9068	0.26607	0.098	0.356871	no
Golga7	chr8:23241325-23257080	70.6008	59.8273	-0.23888	0.0818	0.315166	no
Cfdp1	chr8:111768472-111854310	70.5933	67.8166	-0.0578938	0.6878	0.924933	no
Rnf7	chr9:96470956-96478595	70.4899	76.0988	0.110455	0.4369	0.799481	no
Ganab	chr19:8898056-8916742	70.4537	70.2872	-0.00341339	0.98055	0.996386	no
Qdpr	chr5:45434031-45450229	70.2075	55.2152	-0.346559	0.01445	0.0863245	no
5730508B09Rik	chr3:127869687-127896323	70.1875	73.8871	0.0741066	0.58845	0.888125	no
Tmed4	chr11:6270713-6274837	70.1719	71.2322	0.0216344	0.87075	0.977494	no
Ehd1	chr19:6276895-6300096	70.1693	85.2686	0.281175	0.03865	0.183551	no
Reep5	chr18:34344885-34373415	70.1398	71.1139	0.0198984	0.881	0.978016	no
Srsf9	chr5:115327176-115333080	70.1092	66.3533	-0.0794364	0.57725	0.884329	no
Prrc2b	chr2:32151147-32234537	69.9356	65.0229	-0.10508	0.5103	0.849086	no
Ldhb	chr6:142490248-142507957	69.8395	50.4151	-0.470187	0.0013	0.0117625	yes
Gpr37	chr6:25668522-25689980	69.8033	47.8428	-0.544994	5e-05	0.000658218	yes
Pon2	chr6:5264623-5298373	69.7551	82.6762	0.245173	0.0673	0.273743	no
Amfr	chr8:93971587-94012640	69.7349	72.9168	0.0643707	0.63455	0.905446	no
Adprh	chr16:38445398-38452689	69.6897	70.6831	0.0204194	0.8838	0.978016	no
Rnf130	chr11:50025330-50125719	69.6124	62.605	-0.153066	0.289	0.667469	no
Selt	chr3:58576657-58593546	69.5936	66.6762	-0.0617842	0.6481	0.911157	no
Hiatl1	chr13:65065029-65112982	69.5333	54.9223	-0.340313	0.01235	0.076351	no
Fscn1	chr5:142960354-142973189	69.5231	22.5204	-1.62626	5e-05	0.000658218	yes
Tsen34	chr7:3693609-3701035	69.517	65.6551	-0.0824588	0.5623	0.877264	no
M6pr	chr6:122309009-122317677	69.4857	73.6295	0.0835673	0.53005	0.859911	no
Scamp1	chr13:94201432-94285281	69.4611	77.5019	0.158027	0.24885	0.618587	no
Stip1	chr19:7020695-7040026	69.4372	75.5123	0.121002	0.3644	0.741045	no
Son	chr16:91647823-91679192	69.2223	67.9594	-0.0265627	0.86525	0.977149	no
Strap	chr6:137735081-137751930	69.046	68.5092	-0.0112592	0.93215	0.986667	no
Prkcsh	chr9:22002987-22014245	69.0147	79.7413	0.208424	0.12655	0.42129	no
H2-D1	chr17:35263093-35267497	68.9953	81.1734	0.234509	0.09055	0.33726	no
Mpc2	chr1:165461207-165481214	68.9792	65.0722	-0.0841205	0.5951	0.890928	no
Sort1	chr3:108284063-108361519	68.9187	65.4858	-0.0737149	0.61945	0.902247	no
Fech	chr18:64456549-64489066	68.8935	66.7942	-0.0446467	0.7375	0.943224	no
Insig1	chr5:28071411-28078662	68.7355	67.903	-0.0175808	0.90015	0.98099	no
Nr1h2	chr7:44549615-44553965	68.6699	62.0324	-0.146656	0.279	0.658086	no
Abhd5	chr9:122351615-122381523	68.6121	76.0684	0.148834	0.274	0.652992	no
Ap1s1	chr5:137034993-137046060	68.5202	86.0606	0.328824	0.01965	0.108851	no
Ahsa1	chr12:87266727-87273952	68.5143	74.2425	0.115839	0.3984	0.768784	no
Psme2	chr14:55587439-55591101	68.496	59.6232	-0.200147	0.20825	0.560906	no
Apex1	chr14:50924948-50930849	68.4936	57.3033	-0.25735	0.2419	0.608623	no
Atxn10	chr15:85336380-85463836	68.4914	90.5809	0.403284	0.00305	0.0241471	yes
Txndc5	chr13:38500270-38528824	68.45	77.3139	0.175677	0.1974	0.545409	no
Eif4a2	chr16:23107467-23127730	68.4442	69.6316	0.0248146	0.85825	0.974907	no
Bzw2	chr12:36091834-36156825	68.3813	77.1833	0.174688	0.1958	0.544137	no
Dpp7	chr2:25352289-25356332	68.3304	62.6746	-0.124646	0.3618	0.738152	no
Capn1	chr19:5988544-6018459	68.2482	70.3589	0.0439426	0.74935	0.945135	no
Hspb8	chr5:116408490-116422864	68.2381	79.0171	0.211587	0.11375	0.393122	no
Paip2	chr18:35598666-35627227	68.2305	64.3207	-0.0851325	0.54075	0.86581	no
Nrbp1	chr5:31240917-31251562	68.2185	71.2638	0.0630066	0.62925	0.905418	no
Ppp4c	chr7:126785867-126792471	68.0602	65.2492	-0.0608498	0.6632	0.914469	no
Dhx9	chr1:153455757-153487660	68.0357	57.512	-0.242428	0.08045	0.311706	no
Ctdnep1	chr11:69968225-69990600	68.0356	59.688	-0.188848	0.2574	0.630249	no
Ifitm3	chr7:141009589-141010744	68.0304	59.4501	-0.194501	0.2788	0.657975	no
Litaf	chr16:10959272-10993121	68.0214	127.371	0.904975	5e-05	0.000658218	yes
Nap1l1	chr10:111473191-111498150	67.9732	91.0867	0.422273	0.00785	0.0526756	no
Atpif1	chr4:132530554-132535414	67.6993	69.3616	0.0349977	0.798	0.96063	no
Pole4	chr6:82646711-82652865	67.6662	52.9476	-0.353872	0.01	0.0646226	no
Lsm4	chr8:70673230-70678752	67.5435	67.8808	0.00718707	0.96225	0.992408	no
Eif3m	chr2:104886323-105017027	67.5416	70.8615	0.0692259	0.6245	0.903639	no
Mthfd1l	chr10:3973074-4167081	67.5271	88.0601	0.383022	0.00565	0.0407075	yes
Lrrc8d	chr5:105699968-105815215	67.5003	76.7112	0.184543	0.1798	0.520046	no
Psmc6	chr14:45329823-45349071	67.4781	78.639	0.220826	0.10355	0.370026	no
Sfr1	chr19:47731755-47735588	67.4434	61.2967	-0.137867	0.3143	0.690191	no
Copb2	chr9:98563730-98588375	67.3833	69.6689	0.0481242	0.71425	0.9357	no
Tspan5	chr3:138742207-138904433	67.3546	57.4093	-0.230494	0.09435	0.348072	no
Etfa	chr9:55454435-55512243	67.3511	72.4981	0.106242	0.44365	0.804924	no
E430025E21Rik	chr15:59331996-59374152	67.2909	56.99	-0.239703	0.09105	0.338412	no
Ets1	chr9:32696041-32757820	67.2105	55.5823	-0.274061	0.0483	0.216539	no
Hprt	chrX:52988077-53021660	67.2064	74.0759	0.140407	0.31135	0.687973	no
Use1	chr8:71366847-71369732	67.1613	66.6332	-0.0113895	0.93995	0.988914	no
Mrps26	chr2:130563756-130565394	67.1435	75.035	0.160315	0.28095	0.659178	no
1110004F10Rik	chr7:116093379-116105210	67.1403	63.9027	-0.0713027	0.60975	0.897384	no
Nop10	chr2:112261925-112262898	67.1361	63.4894	-0.0805735	0.62645	0.90449	no
Adipor1	chr1:134415377-134433350	67.1255	69.9391	0.059237	0.6506	0.911616	no
Ctdsp2	chr10:126978716-126999975	67.0878	54.7644	-0.292811	0.0364	0.175143	no
Rap2b	chr3:61364506-61368703	67.0625	41.4586	-0.693836	5e-05	0.000658218	yes
Xpnpep1	chr19:52991179-53038654	67.0195	68.8784	0.0394697	0.76765	0.951628	no
Mff	chr1:82724917-82752389	66.9571	83.5163	0.318821	0.01925	0.107402	no
Dynlt3	chrX:9654269-9662983	66.9553	70.6578	0.0776515	0.56065	0.876751	no
Srm	chr4:148591512-148594619	66.9042	70.5761	0.0770839	0.5805	0.885745	no
Tbcb	chr7:30224130-30232029	66.8978	79.7708	0.253902	0.0785	0.306254	no
Fbrs	chr7:127485220-127491513	66.7741	61.8626	-0.110221	0.41365	0.780403	no
Mettl9	chr7:121034444-121076835	66.7514	57.0485	-0.226609	0.096	0.351754	no
Apoa1bp	chr3:88056522-88058495	66.7493	64.1153	-0.0580837	0.7002	0.930917	no
Mta2	chr19:8941919-8952300	66.7181	60.047	-0.151986	0.2589	0.632414	no
9530068E07Rik	chr11:52396427-52408723	66.6984	73.8299	0.146554	0.2834	0.661543	no
Txnrd1	chr10:82833950-82897724	66.676	60.4422	-0.141613	0.3039	0.681571	no
Slc39a7	chr17:34028265-34031690	66.6247	74.5952	0.163026	0.2309	0.592236	no
Rsl1d1	chr16:11193036-11203292	66.6073	73.8591	0.149096	0.2761	0.65546	no
Ube2e3	chr2:78869046-78920583	66.5885	47.6155	-0.483841	0.0005	0.00518114	yes
Prrc2a	chr17:35149085-35164877	66.5848	65.6276	-0.0208884	0.89	0.979297	no
Psmd1	chr1:86064618-86139295	66.5245	71.8198	0.110495	0.4113	0.779187	no
Emc3	chr6:113514886-113531638	66.4829	73.6181	0.147077	0.2768	0.656257	no
Mtch2	chr2:90847154-90866634	66.4721	67.9496	0.0317166	0.81265	0.966014	no
Inf2	chr12:112588783-112615557	66.3265	48.1843	-0.461023	0.00055	0.00563807	yes
Dap	chr15:31224384-31274338	66.2521	96.5863	0.543854	5e-05	0.000658218	yes
Napa	chr7:16098642-16117975	66.2199	65.9342	-0.00623944	0.96235	0.992408	no
Tef	chr15:81802672-81826863	66.1917	33.4517	-0.98457	5e-05	0.000658218	yes
Mpzl1	chr1:165592180-165634541	66.1267	66.1122	-0.000316919	0.99815	0.999394	no
Tmem123	chr9:7764076-7794332	66.0995	92.6751	0.487542	0.0003	0.00326971	yes
Ly6g6c	chr17:35067324-35070048	66.098	52.5892	-0.32984	0.0377	0.179865	no
Ptpra	chr2:130450277-130563749	66.0956	65.1725	-0.0202906	0.88295	0.978016	no
Rasa3	chr8:13567217-13677587	66.0743	69.4724	0.0723521	0.5931	0.88995	no
Chmp1a	chr8:123204260-123212788	66.0332	67.1794	0.0248259	0.84725	0.972246	no
Leng8	chr7:4137055-4148173	66.0295	63.8457	-0.0485202	0.72975	0.941076	no
Aprt	chr8:122574636-122576907	65.9748	141.06	1.09632	5e-05	0.000658218	yes
Steap3	chr1:120226415-120271082	65.9713	118.719	0.847643	5e-05	0.000658218	yes
Dhx15	chr5:52150202-52190546	65.9346	57.5574	-0.196035	0.14495	0.460207	no
Ppm1g	chr5:31202667-31220545	65.7842	58.372	-0.172464	0.1953	0.543722	no
Fam210b	chr2:172345576-172355749	65.7826	43.7221	-0.589343	5e-05	0.000658218	yes
Ubap2l	chr3:89998759-90068347	65.7823	63.6511	-0.0475143	0.7534	0.946503	no
Hint2	chr4:43654226-43656445	65.7724	67.1526	0.0299608	0.86885	0.977265	no
Ccnd2	chr6:127125708-127212419	65.6309	83.3147	0.344196	0.01705	0.098081	no
Arf3	chr15:98737625-98763118	65.5847	66.4922	0.0198261	0.8841	0.978016	no
Atp5l	chr9:44913247-44920742	65.51	66.6432	0.024744	0.89945	0.98099	no
Avpi1	chr19:42123274-42128993	65.4878	142.82	1.1249	5e-05	0.000658218	yes
Lsm14a	chr7:34344719-34389540	65.4805	57.11	-0.197323	0.1412	0.452233	no
Cetn3	chr13:81783291-81797157	65.3376	60.6033	-0.108516	0.4729	0.825912	no
Jup	chr11:100368855-100397790	65.211	65.4245	0.00471577	0.97295	0.994633	no
Ict1	chr11:115403765-115410913	65.1528	59.5657	-0.129345	0.4393	0.801627	no
Msrb1	chr17:24736641-24742778	65.1112	73.8052	0.180818	0.2355	0.599323	no
Got1	chr19:43499752-43524605	65.0821	65.9852	0.0198825	0.8844	0.978016	no
Urod	chr4:116990216-116994375	65.0689	51.9485	-0.324887	0.0269	0.139024	no
Ei24	chr9:36779152-36797393	65.0452	54.7822	-0.247734	0.0664	0.271059	no
Maged1	chrX:94535473-94542074	64.8965	69.0249	0.0889759	0.51175	0.849086	no
Flot1	chr17:35823356-35832787	64.8876	61.6639	-0.0735164	0.58945	0.888263	no
Fstl4	chr11:52764705-53187347	64.8774	28.6776	-1.17779	5e-05	0.000658218	yes
Naglu	chr11:101070093-101077671	64.8392	83.15	0.35885	0.00765	0.0516126	no
Asl	chr5:130011502-130024331	64.7769	56.4861	-0.197584	0.15945	0.486223	no
Plin3	chr17:56278961-56290511	64.6847	69.4158	0.101841	0.4543	0.813075	no
Adamtsl4	chr3:95676200-95687917	64.6479	44.2597	-0.546612	0.0001	0.00122911	yes
Mea1	chr17:46674550-46705002	64.5831	73.8921	0.194264	0.5318	0.861112	no
Dynll1	chr5:115297109-115300990	64.4934	70.6216	0.130958	0.33425	0.711851	no
Gstm5	chr3:107877229-107898685	64.4509	48.4357	-0.412132	0.04355	0.200456	no
Nfkbia	chr12:55280813-55492647	64.4407	63.513	-0.020921	0.947	0.990112	no
Ghitm	chr14:37120444-37135322	64.3906	81.0771	0.332446	0.0135	0.0817507	no
Tmbim1	chr1:74285033-74353692	64.35	90.2452	0.48791	0.0011	0.010183	yes
Arhgef1	chr7:24902985-24926591	64.3487	66.564	0.0488302	0.7131	0.935636	no
Ak2	chr4:128993223-129011529	64.3187	64.9685	0.0145027	0.9194	0.983577	no
Tnfrsf19	chr14:60963833-61046855	64.3116	52.812	-0.284214	0.03905	0.184955	no
Ppp3r1	chr11:17159297-17200380	64.2936	61.4838	-0.0644673	0.63835	0.907352	no
Ywhaz	chr15:36770261-36796929	64.2686	77.1258	0.263098	0.0598	0.252502	no
Psmg4	chr13:34162963-34178172	64.2049	73.669	0.198373	0.30655	0.683953	no
Ap1m1	chr8:72240131-72257379	63.9976	70.5799	0.141239	0.29155	0.670604	no
Hnrnpul2	chr19:8819400-8834142	63.9672	63.7309	-0.00533806	0.97055	0.994554	no
Ikbkb	chr8:22659204-22706583	63.9293	49.2627	-0.375981	0.006	0.0425866	yes
Ccnl2	chr4:155812488-155824543	63.928	65.75	0.0405419	0.7645	0.950692	no
Stt3b	chr9:115242581-115310421	63.9215	63.9282	0.000151842	0.9986	0.999394	no
Sytl2	chr7:90302354-90410719	63.9169	76.9449	0.26763	0.0689	0.277974	no
Rpl5	chr5:107900527-107987077	63.9063	59.1136	-0.11247	0.42945	0.792942	no
Mbnl1	chr3:60472829-60629748	63.8638	83.2185	0.381905	0.0084	0.055853	no
Rad21	chr15:51962603-51991760	63.8607	51.0774	-0.322244	0.016	0.0932945	no
Prpsap1	chr11:116470815-116490346	63.8602	72.3094	0.179266	0.1837	0.525934	no
Abcf1	chr17:35956818-35969750	63.8515	60.8376	-0.0697574	0.6064	0.895533	no
Psmd14	chr2:61711693-61800376	63.7378	68.5276	0.104535	0.447	0.807371	no
Zfyve21	chr12:111814169-111828388	63.6952	55.3253	-0.203245	0.1644	0.494874	no
Cox7a2l	chr17:83501916-83514333	63.6674	66.6508	0.0660685	0.6493	0.911234	no
Sars	chr3:108424863-108445259	63.6633	88.6564	0.477763	0.0003	0.00326971	yes
Idh3g	chrX:73778962-73786897	63.6138	68.5614	0.108057	0.44445	0.805695	no
Map2k2	chr10:81105946-81124697	63.552	54.108	-0.232096	0.08475	0.322528	no
Mvp	chr7:126986859-127014594	63.4879	59.0806	-0.103797	0.43885	0.801563	no
Clstn1	chr4:149586467-149648899	63.4595	60.0605	-0.0794198	0.56355	0.878189	no
Atp6v1c1	chr15:38661903-38692444	63.3622	77.3439	0.287665	0.0324	0.160628	no
Manbal	chr2:157367593-157396763	63.3377	57.0667	-0.150414	0.31165	0.688011	no
Col17a1	chr19:47646340-47692042	63.3275	68.2575	0.108156	0.46705	0.821771	no
Eno1,Eno1b	chr4:150237196-150248873	63.3272	80.3236	0.342998	0.1566	0.481315	no
Phc2	chr4:128654701-128752881	63.2927	70.8024	0.161759	0.23225	0.594342	no
Ppa1	chr10:61648620-61674165	63.2354	74.3976	0.234523	0.09585	0.351516	no
Slc38a10	chr11:120103950-120151351	63.1062	58.3989	-0.111841	0.42365	0.788595	no
Prpf8	chr11:75486776-75509447	63.0314	58.7952	-0.100373	0.50005	0.842132	no
Rbm42	chr7:30640994-30650228	62.9531	65.5951	0.059312	0.66565	0.915407	no
Tfap2b	chr1:19208913-19238845	62.9479	55.6724	-0.177195	0.22615	0.586714	no
Tmed3	chr9:89699202-89705043	62.9385	82.5728	0.391723	0.0051	0.0375068	yes
Dtymk	chr1:93792575-93801934	62.9219	64.2196	0.0294532	0.86475	0.977149	no
Ap3d1	chr10:80706977-80742211	62.9042	65.908	0.0672976	0.63745	0.907073	no
Tmem9b	chr7:109735835-109752263	62.8375	68.6792	0.128246	0.3461	0.724307	no
Enho	chr4:41569793-41640302	62.8243	95.2821	0.600883	5e-05	0.000658218	yes
Slc25a1	chr16:17925210-17928219	62.7211	70.9894	0.178652	0.19385	0.540898	no
Tspan31	chr10:127067289-127070261	62.7091	60.6932	-0.0471397	0.7322	0.941692	no
Dek	chr13:47043498-47106221	62.6829	54.0028	-0.215038	0.1586	0.485041	no
Ptp4a2	chr4:129820478-129850003	62.6762	69.7038	0.153321	0.2563	0.628796	no
Rap2a	chr14:120478460-120507192	62.6441	80.087	0.354389	0.00965	0.0627528	no
Snf8	chr11:96034916-96047405	62.6435	67.7263	0.112551	0.4628	0.818815	no
Trappc2l	chr8:122611625-122615591	62.5506	74.0976	0.244403	0.1728	0.507992	no
Sdc1	chr12:8771395-8793687	62.5156	61.9347	-0.0134689	0.92375	0.984658	no
Chmp5	chr4:40948552-40965302	62.5015	63.4784	0.022375	0.8724	0.977494	no
Galk1	chr11:115974724-116012719	62.4298	62.1826	-0.00572483	0.98465	0.997084	no
Dnaja2	chr8:85537639-85555271	62.4154	58.264	-0.0992968	0.4626	0.818815	no
Mrpl13	chr15:55534094-55557312	62.2687	66.9496	0.104567	0.52785	0.858586	no
Nop56	chr2:130274411-130284451	62.2072	61.9129	-0.00684204	0.9738	0.994959	no
Arl6ip5	chr6:97210791-97233315	62.2037	79.333	0.35092	0.01265	0.0778182	no
Emc10	chr7:44489937-44496513	62.1086	57.197	-0.118852	0.38165	0.755992	no
Cav2	chr6:17281184-17289130	62.1052	109.36	0.816303	5e-05	0.000658218	yes
Ptov1	chr7:44863067-44869788	62.0954	47.5319	-0.385589	0.00465	0.0346489	yes
Filip1l	chr16:57301999-57606867	62.0254	27.1884	-1.18987	5e-05	0.000658218	yes
Necap2	chr4:141066511-141078345	62.021	55.8957	-0.150018	0.27385	0.652992	no
Tacstd2	chr6:67534058-67535822	61.8217	59.1584	-0.0635289	0.64945	0.911234	no
Slc39a1	chr3:90248191-90253612	61.8066	64.6876	0.0657276	0.6292	0.905418	no
Spag7	chr11:70663768-70669416	61.777	71.5613	0.212108	0.1451	0.46033	no
Dusp1	chr17:26505590-26508472	61.773	95.5812	0.629751	5e-05	0.000658218	yes
Map6	chr7:99267446-99337137	61.7386	81.4455	0.399664	0.00535	0.0389988	yes
Tspan3	chr9:56135883-56161070	61.7369	55.8737	-0.143963	0.296	0.674476	no
Atic	chr1:71557155-71579403	61.685	60.3203	-0.0322774	0.80525	0.963221	no
BC031181	chr18:75005899-75009933	61.6769	69.3596	0.169367	0.25075	0.621071	no
Aars	chr8:111033841-111055569	61.6668	85.9523	0.479042	0.0008	0.00771655	yes
Ssna1	chr2:25271038-25272418	61.6304	58.6082	-0.0725393	0.65715	0.91277	no
Nudt4	chr10:95547006-95564167	61.6158	78.5145	0.349659	0.0107	0.068293	no
Fuca1	chr4:135920725-135940300	61.5951	56.747	-0.118273	0.3779	0.753615	no
Sympk	chr7:19024376-19054622	61.5648	59.2507	-0.0552723	0.68495	0.922932	no
Kazn	chr4:142102389-142239401	61.5474	40.003	-0.62159	5e-05	0.000658218	yes
Snx9	chr17:5841379-5930711	61.5368	68.3396	0.151273	0.26225	0.636724	no
Tram1	chr1:13564692-13589910	61.5324	56.596	-0.120648	0.36875	0.744214	no
Csnk1d	chr11:120961740-120991333	61.5147	59.4201	-0.0499809	0.7161	0.936442	no
Dcun1d5	chr9:7184565-7207031	61.4859	61.1227	-0.00854795	0.9533	0.990793	no
Slmo2	chr2:174465090-174472941	61.4793	84.6523	0.461448	0.0009	0.00853522	yes
Emg1	chr6:124663103-124712178	61.4788	61.7153	0.00553968	0.9811	0.996386	no
Pea15a	chr1:172196728-172206781	61.4282	68.192	0.150702	0.26195	0.636242	no
D17Wsu92e	chr17:27751231-27820542	61.3462	57.5804	-0.0913971	0.5076	0.846894	no
Tmem242	chr17:5410863-5440260	61.3394	63.7061	0.0546175	0.7185	0.936778	no
Dusp6	chr10:99263230-99267489	61.3307	56.7611	-0.111706	0.4058	0.77454	no
Dnajc7	chr11:100582835-100620168	61.2617	60.4548	-0.0191297	0.8849	0.978329	no
Agpat3	chr10:78271562-78351700	61.209	47.3537	-0.370269	0.00725	0.0494514	yes
Nap1l4	chr7:143513578-143549120	61.1763	59.5975	-0.0377208	0.77685	0.95395	no
Mrpl2	chr17:46646247-46650132	61.103	59.4895	-0.0386069	0.80085	0.961515	no
Srsf1	chr11:88047372-88053757	61.0852	49.9196	-0.291216	0.0395	0.186659	no
Rnf13	chr3:57736061-57835425	61.0297	50.9358	-0.260833	0.08915	0.334454	no
Map4k4	chr1:39900912-40026310	60.8583	47.9823	-0.342953	0.0143	0.0857586	no
Mydgf	chr17:56176540-56183920	60.8046	74.1171	0.285627	0.06095	0.256139	no
Rnd2	chr11:101468337-101471306	60.7556	52.5123	-0.210362	0.2358	0.599472	no
Vti1b	chr12:79130787-79172458	60.705	69.434	0.193827	0.17615	0.514524	no
Rnase4	chr14:51091076-51106151	60.6645	120.604	0.991352	5e-05	0.000658218	yes
Sra1	chr18:36667186-36670311	60.6219	74.3591	0.294671	0.04995	0.222251	no
Tax1bp1	chr6:52713728-52766779	60.5923	68.6379	0.179872	0.18255	0.524335	no
Hspa4	chr11:53259813-53300479	60.5799	65.4079	0.110627	0.4135	0.780357	no
Mybbp1a	chr11:72441377-72451550	60.5273	61.8726	0.031715	0.8174	0.967104	no
Iah1	chr12:21316391-21373632	60.5257	51.5499	-0.23158	0.3471	0.724672	no
Maea	chr5:33335571-33373294	60.4924	60.8914	0.00948436	0.9435	0.989192	no
Agrn	chr4:156165289-156197488	60.3438	58.0594	-0.0556759	0.7108	0.935128	no
Hmgcr	chr13:96648961-96670936	60.3239	58.573	-0.0424946	0.76355	0.950692	no
Naa38	chr11:69395790-69398234	60.296	66.5864	0.143163	0.4754	0.827948	no
Arl6ip4	chr5:124116107-124118195	60.2289	59.6349	-0.0143003	0.9214	0.984021	no
Mbnl2	chr14:120275668-120431698	60.1662	58.864	-0.0315684	0.81785	0.967162	no
Srpr	chr9:35211202-35267805	60.1384	72.1771	0.263254	0.0651	0.267955	no
Psmd12	chr11:107479527-107498036	60.1074	65.6908	0.128149	0.34215	0.720762	no
Anxa7	chr14:20455260-20480133	60.106	94.0776	0.646342	5e-05	0.000658218	yes
Kif1c	chr11:70700547-70731970	60.1015	47.4602	-0.340684	0.01585	0.0925938	no
Gja1	chr10:56377299-56390419	60.1006	61.3652	0.0300419	0.8272	0.967541	no
Pnrc2	chr4:135870925-135873846	60.0433	47.5765	-0.335755	0.01275	0.0783169	no
Mrpl54	chr10:81264721-81266926	60.0405	74.4554	0.31044	0.09005	0.336391	no
Psme3	chr11:101316250-101323530	59.9979	62.3488	0.0554503	0.6758	0.919553	no
Npnt	chr3:132881744-132950291	59.9539	99.1916	0.726365	5e-05	0.000658218	yes
Plekhm2	chr4:141625733-141664115	59.9498	44.1179	-0.442391	0.0015	0.0133484	yes
Scamp3	chr3:89164794-89182770	59.9327	63.1228	0.074816	0.69315	0.927437	no
Sema6d	chr2:124089968-124667789	59.9049	20.5707	-1.54209	5e-05	0.000658218	yes
Ccs	chr19:4825365-4839322	59.8762	52.5717	-0.187698	0.2187	0.576186	no
Fam134c	chr11:101096321-101119843	59.8717	57.6652	-0.0541734	0.68455	0.922894	no
Gtf2h5	chr17:6079827-6085485	59.8338	54.8492	-0.125492	0.39915	0.769537	no
Srrm1	chr4:135320483-135353214	59.7818	51.7702	-0.207585	0.12025	0.407308	no
Tomm5	chr4:45105209-45108113	59.7255	80.5318	0.431213	0.0156	0.0914346	no
Prkag1	chr15:98812796-98831508	59.7238	57.7023	-0.0496774	0.71875	0.936778	no
Sf3b1	chr1:54985169-55027478	59.6875	58.7757	-0.0222089	0.8771	0.977764	no
Cdc42se1	chr3:95181765-95236424	59.6336	58.4079	-0.0299625	0.8722	0.977494	no
Cyp51	chr5:4080673-4104697	59.6094	70.7661	0.247517	0.0747	0.294857	no
G6pdx	chrX:74393290-74453778	59.6061	74.7222	0.326077	0.0485	0.2172	no
Pdhb	chr14:8165990-8172992	59.5706	57.6156	-0.0481407	0.7335	0.941803	no
Flot2	chr11:78037940-78060432	59.549	53.0546	-0.1666	0.22105	0.579809	no
Hnrnpdl	chr5:100033578-100039222	59.5469	52.3902	-0.184729	0.16995	0.504152	no
Dnm2	chr9:21424907-21510186	59.5345	60.4859	0.0228712	0.8723	0.977494	no
Efhd2	chr4:141858141-141874920	59.4937	62.6153	0.073777	0.5873	0.888096	no
Mfsd1	chr3:67582767-67604231	59.4921	70.4156	0.243196	0.06845	0.276968	no
Pdzrn3	chr6:101149606-101377897	59.4896	37.7416	-0.656482	5e-05	0.000658218	yes
Clptm1	chr7:19631579-19665030	59.4408	54.3778	-0.128436	0.34815	0.72587	no
S100a13	chr3:90514434-90524581	59.3442	56.7591	-0.0642555	0.7147	0.935994	no
Serpina3j	chr12:104314569-104320586	59.2907	32.4224	-0.870814	5e-05	0.000658218	yes
Cdc42se2	chr11:54717414-54787703	59.256	64.2657	0.117089	0.38345	0.757021	no
Slc15a4	chr5:127595665-127617392	59.2538	34.7172	-0.771256	5e-05	0.000658218	yes
Bola3	chr6:83349483-83358392	59.2213	70.3982	0.249422	0.19435	0.541684	no
Morf4l1	chr9:90091668-90114820	59.0946	59.9949	0.0218131	0.87175	0.977494	no
Cyr61	chr3:145646970-145649985	59.0791	72.7018	0.299342	0.0271	0.139767	no
Tbc1d10a	chr11:4186832-4215505	59.0378	48.9136	-0.271402	0.04765	0.21471	no
Arf6	chr12:69372149-69375980	58.9955	63.7578	0.111996	0.4127	0.780004	no
Mrps34	chr17:24895119-24896273	58.9224	60.2092	0.0311681	0.84335	0.971092	no
Etf1	chr18:34902784-34932003	58.9027	65.5727	0.154762	0.24765	0.616716	no
Idh1	chr1:65158615-65186479	58.898	56.6973	-0.0549393	0.6866	0.924252	no
Scamp2	chr9:57560943-57588798	58.8945	45.4805	-0.372884	0.00655	0.0455783	yes
P2rx4	chr5:122707556-122729042	58.8202	85.4511	0.538788	0.0001	0.00122911	yes
Usf2	chr7:30945247-30956803	58.8193	47.497	-0.308454	0.0241	0.127799	no
Tmx1	chr12:70244534-70669399	58.8048	55.5427	-0.0823369	0.53855	0.864214	no
Psenen	chr7:30561865-30563184	58.7424	60.0207	0.0310573	0.8634	0.97663	no
Ip6k1	chr9:108002647-108048782	58.6243	47.1677	-0.313699	0.0209	0.114145	no
Chtop	chr3:90498538-90509498	58.6197	47.9279	-0.290522	0.0394	0.186328	no
Ntmt1	chr2:30807976-30823014	58.5634	53.9028	-0.11964	0.41205	0.779517	no
Fkbp3	chr12:65036333-65073938	58.5408	90.0635	0.621501	0.00625	0.0439838	yes
Shc4	chr2:125627446-125724148	58.4221	58.0103	-0.0102065	0.95025	0.990462	no
Gdi1	chrX:74305011-74311867	58.4193	63.216	0.113844	0.3883	0.760789	no
Leprot	chr4:101647782-101659358	58.2955	63.4716	0.122726	0.36745	0.742899	no
Atxn2l	chr7:126491707-126503302	58.2088	61.9945	0.0909015	0.4998	0.84209	no
Yipf3	chr17:46248079-46252537	58.1664	60.6749	0.0609119	0.6511	0.91183	no
Fxr1	chr3:34020078-34081354	58.0971	60.6821	0.0628044	0.6773	0.920114	no
Rpl15	chr14:18267822-18270986	58.092	53.8418	-0.109612	0.42275	0.788227	no
Gosr2	chr11:103676848-103697710	58.0395	54.8664	-0.0811124	0.5469	0.868488	no
Rabggtb	chr3:153907288-153912966	57.9679	61.8165	0.0927359	0.50915	0.84806	no
Rbck1	chr2:152316333-152332639	57.9679	49.0714	-0.240373	0.07585	0.297881	no
Akt1s1	chr7:44849223-44855421	57.9611	54.8035	-0.0808176	0.5607	0.876751	no
Ugdh	chr5:65413221-65435842	57.9515	61.3532	0.082293	0.5351	0.862351	no
Acot13	chr13:24817954-24831489	57.9121	55.218	-0.068725	0.70275	0.932842	no
Fam63a	chr3:95282934-95307176	57.8948	74.6297	0.366316	0.00905	0.0592859	no
Acin1	chr14:54642160-54690742	57.8183	55.646	-0.0552471	0.7292	0.940986	no
Atf3	chr1:191170296-191183333	57.8178	85.2177	0.559638	5e-05	0.000658218	yes
BC005537	chr13:24801656-24812899	57.8159	59.7799	0.0481924	0.71875	0.936778	no
Ppp2cb	chr8:33599620-33641976	57.8087	54.7557	-0.0782791	0.6231	0.903021	no
Hars	chr18:36766527-36783205	57.7288	63.2855	0.132584	0.32355	0.700818	no
Slc35b1	chr11:95384921-95391652	57.6662	71.9164	0.318595	0.0292	0.148136	no
Mrpl24	chr3:87919543-87930195	57.6489	54.7643	-0.0740573	0.6664	0.91583	no
Dazap1	chr10:79697304-80369637	57.5955	55.589	-0.0511563	0.97095	0.994554	no
Ppp1cb	chr5:32458969-32493712	57.5924	88.3861	0.61794	5e-05	0.000658218	yes
Sprr1a	chr3:92483953-92485881	57.588	78.1234	0.439986	0.0094	0.0613843	no
Nsdhl	chrX:72918520-72958528	57.4557	47.3059	-0.28043	0.0399	0.187977	no
Wasf2	chr4:133130632-133198330	57.4363	54.6226	-0.0724662	0.5969	0.892191	no
Nrcam	chr12:44328884-44601846	57.435	34.1314	-0.75083	5e-05	0.000658218	yes
Tjp2	chr19:24094501-24225026	57.4253	35.8536	-0.679567	5e-05	0.000658218	yes
Rer1	chr4:155074111-155086297	57.4244	66.1482	0.204038	0.1399	0.449927	no
Mvb12b	chr2:33729955-33887946	57.423	35.2738	-0.70303	5e-05	0.000658218	yes
Fh1	chr1:175601377-175625635	57.3848	61.8455	0.108	0.43765	0.800499	no
Rraga	chr4:86575672-86577283	57.3807	61.0783	0.0900945	0.5138	0.850328	no
Drg1	chr11:3202352-3479831	57.3076	57.8314	0.0131279	0.9682	0.994229	no
Nrd1	chr4:109000804-109202272	57.3002	56.4724	-0.0209924	0.9081	0.981267	no
Cdc42bpb	chr12:111292971-111377718	57.2431	63.1197	0.14099	0.32465	0.70207	no
2700060E02Rik	chr14:19751256-19823823	57.2355	60.0367	0.0689345	0.7437	0.944824	no
Plin2	chr4:86656564-86670059	57.1946	56.6275	-0.0143762	0.91705	0.982797	no
Sirpa	chr2:129592838-129632228	57.1868	49.23	-0.216146	0.11965	0.406162	no
Tollip	chr7:141881584-141902406	57.1545	57.0851	-0.00175351	0.9893	0.997253	no
March2	chr17:33685691-33718677	57.1377	44.0616	-0.374922	0.01415	0.0850233	no
Elovl3	chr19:46131898-46148325	57.1108	30.1062	-0.923701	5e-05	0.000658218	yes
Map2k3	chr11:60932056-60952803	57.002	84.1402	0.561784	5e-05	0.000658218	yes
Nagk	chr6:83795056-83802556	56.988	77.5632	0.444716	0.00215	0.0180095	yes
Maf1	chr15:76351293-76354378	56.9643	52.4336	-0.119567	0.3929	0.764852	no
Glyr1	chr16:5013901-5049910	56.9181	51.0643	-0.156574	0.24355	0.611164	no
Ppp6r1	chr7:4631494-4658950	56.8715	56.4818	-0.00992033	0.93865	0.988752	no
Snora64	chr17:24720062-24721927	56.8648	50.5031	-0.171164	0.835	0.968872	no
Ipo5	chr14:120911193-120948044	56.8446	71.3708	0.328309	0.0182	0.103214	no
Chmp6	chr11:119602904-119928917	56.8375	58.0262	0.0298592	0.87675	0.977764	no
Nsfl1c	chr2:151494181-151511310	56.8175	64.871	0.191239	0.16655	0.497606	no
Commd10	chr18:46958875-47087994	56.8142	58.1987	0.0347339	0.8047	0.962908	no
Ap2a1	chr7:44896078-44929490	56.8036	59.9533	0.0778569	0.5673	0.879474	no
Mtdh	chr15:34082718-34142385	56.7783	64.5833	0.185821	0.16995	0.504152	no
Sumo3	chr10:77606096-77618331	56.7777	57.1265	0.0088353	0.94615	0.98993	no
Arpc5l	chr2:39008138-39015872	56.7427	57.1098	0.00930513	0.9513	0.990592	no
Isoc2a	chr7:4877052-4895716	56.7422	42.0607	-0.431948	0.0067	0.0463881	yes
Nudt9	chr5:104046863-104065378	56.6917	70.575	0.31602	0.0218	0.117817	no
Xbp1	chr11:5520640-5525993	56.6635	64.0783	0.177414	0.1881	0.532393	no
Fam134a	chr1:75142785-75147909	56.6285	70.196	0.309859	0.02405	0.127588	no
Ddt	chr10:75771232-75773374	56.6035	56.9652	0.0091917	0.9619	0.992408	no
Arl2bp	chr8:94666599-94674457	56.5983	64.6058	0.190905	0.16175	0.490106	no
Cnih1	chr14:46775567-46788357	56.5533	76.4194	0.434327	0.0021	0.0177102	yes
Aimp1	chr3:132660497-132683879	56.5362	65.3121	0.208177	0.1605	0.488225	no
H2-T23	chr17:35994503-36038174	56.5211	19.0557	-1.56856	5e-05	0.000658218	yes
Tmod3	chr9:75497783-75559657	56.4459	48.6625	-0.214058	0.1149	0.394679	no
Slc48a1	chr15:97784364-97844502	56.4198	64.6752	0.197009	0.1908	0.535275	no
Ssrp1	chr2:85037119-85047114	56.386	61.8533	0.133513	0.3229	0.700157	no
Cpeb1	chr7:81347025-81454758	56.3424	73.1548	0.376732	0.00595	0.0423285	yes
Abhd4	chr14:54254128-54269169	56.3286	50.748	-0.150519	0.26255	0.637079	no
Serinc3	chr2:163623272-163645800	56.323	69.7903	0.309303	0.02455	0.129632	no
Gsk3a	chr7:25228258-25237851	56.3063	51.0173	-0.142311	0.30835	0.685136	no
Rtfdc1	chr2:172440577-172469899	56.1551	59.0788	0.0732234	0.5898	0.888263	no
Mmadhc	chr2:50279880-50296677	56.1383	65.3415	0.219014	0.13305	0.435226	no
Ap2m1	chr16:20535479-20544909	56.0775	62.0437	0.145863	0.27975	0.658539	no
Rpp21	chr17:36255672-36257846	56.0674	60.1685	0.101847	0.6217	0.903021	no
St3gal1	chr15:67102874-67176882	56.0339	34.3746	-0.704957	5e-05	0.000658218	yes
Abhd17a	chr10:80583648-80590341	56.0034	49.1357	-0.188744	0.19385	0.540898	no
Chchd1	chr14:20702011-20704425	55.9168	58.5721	0.0669317	0.7222	0.938097	no
Tmem192	chr8:64947184-64969037	55.9162	61.7863	0.14402	0.3372	0.715311	no
Pum2	chr12:8674133-8752583	55.8153	53.4541	-0.0623616	0.6629	0.914469	no
Jtb	chr3:90231596-90235840	55.7926	61.0426	0.129742	0.3836	0.757197	no
Nisch	chr14:31170927-31206826	55.6964	58.5871	0.0729991	0.60175	0.893318	no
Prdx3	chr19:60864065-60874538	55.6658	54.6819	-0.0257267	0.8554	0.974661	no
Hnrnpf	chr6:117900339-117925622	55.6508	47.9074	-0.216152	0.1154	0.396177	no
Dld	chr12:31331561-31351471	55.6166	61.8878	0.154141	0.24525	0.61357	no
Mrpl42	chr10:95480805-95501927	55.5892	61.9203	0.155607	0.37515	0.750542	no
Rpl30	chr15:34440505-34443276	55.5005	56.2087	0.0182907	0.9637	0.993058	no
Timm17a	chr1:135301534-135313737	55.4198	64.6835	0.222995	0.15575	0.480269	no
Vwa5a	chr9:38718267-38743337	55.4029	72.5625	0.389264	0.00435	0.032708	yes
Pdlim5	chr3:142239584-142395696	55.3817	48.3215	-0.196744	0.15535	0.47973	no
Ywhag	chr5:135908378-135934641	55.3646	82.0906	0.568254	5e-05	0.000658218	yes
Pdcd6	chr13:74303120-74317326	55.3331	61.2164	0.145777	0.2965	0.674956	no
Ctnnbl1	chr2:157737400-157891903	55.2937	39.7585	-0.47585	0.00065	0.006476	yes
Tcf12	chr9:71844251-72111819	55.2906	74.3144	0.426607	0.00255	0.0207306	yes
AA465934	chr11:83291698-83298977	55.2817	48.7292	-0.182014	0.6254	0.90423	no
Hadha	chr5:30103583-30154980	55.1111	49.4215	-0.157203	0.24935	0.619087	no
Eftud2	chr11:102838471-102880975	55.0759	56.9259	0.0476644	0.7186	0.936778	no
Hsd17b11	chr5:103989764-104021796	55.0735	26.7149	-1.04371	5e-05	0.000658218	yes
Brd2	chr17:34112018-34122607	55.0665	52.1094	-0.0796328	0.56615	0.879183	no
Furin	chr7:80389193-80405436	55.0175	55.4027	0.0100667	0.9424	0.989192	no
Arcn1	chr9:44742143-44767808	54.9918	61.5601	0.162779	0.2223	0.581481	no
Dpp3	chr19:4907228-4928287	54.9391	56.4156	0.0382624	0.7779	0.954216	no
Chtf8	chr8:106883862-106893593	54.9326	61.5466	0.164017	0.2224	0.581481	no
Ddr1	chr17:35681566-35704139	54.9091	45.9068	-0.258336	0.0554	0.238797	no
Cast	chr13:74693293-74808760	54.8849	80.6828	0.555852	0.00015	0.00177006	yes
Sub1	chr15:11981338-11996007	54.8834	55.498	0.0160643	0.90385	0.98099	no
Mxd4	chr5:34176579-34187710	54.8208	42.272	-0.37502	0.01775	0.10117	no
Cuedc2	chr19:46328183-46338660	54.8175	44.76	-0.292427	0.0431	0.199049	no
Usp5	chr6:124815018-124829447	54.805	56.5179	0.0444001	0.738	0.943224	no
Echs1	chr7:140105722-140116423	54.6401	48.714	-0.165624	0.2511	0.621195	no
Mrpl14	chr17:45686371-45698495	54.5887	64.1012	0.231749	0.21685	0.573025	no
Fads1	chr19:10182887-10196872	54.5567	58.7823	0.107625	0.43155	0.794062	no
Pdap1	chr5:145128769-145140089	54.5374	53.1878	-0.0361514	0.7948	0.959977	no
Vps26a	chr10:62454842-62486805	54.5157	60.8643	0.158925	0.2402	0.605576	no
Rdx	chr9:52002060-52088738	54.3973	39.6186	-0.457358	0.001	0.00936199	yes
Uba2	chr7:34140696-34168529	54.3702	52.2155	-0.0583379	0.66315	0.914469	no
Map2k1	chr9:64185792-64253605	54.3576	67.5798	0.314111	0.0196	0.10872	no
Atp6v1h	chr1:5083172-5162549	54.3008	112.241	1.04756	5e-05	0.000658218	yes
Gba	chr3:89202924-89208966	54.2962	64.3867	0.24591	0.07345	0.29122	no
Cyb5b	chr8:107150660-107187470	54.2207	79.4066	0.550415	0.00015	0.00177006	yes
Serpinb5	chr1:106861179-106883348	54.201	45.5535	-0.250755	0.069	0.278287	no
Rab12	chr17:66494511-66519670	54.1757	46.6239	-0.216576	0.1167	0.399755	no
Ano10	chr9:122175873-122294423	54.1707	49.7961	-0.121481	0.372	0.74725	no
Parl	chr16:20279820-20302362	54.1566	51.2005	-0.080981	0.57995	0.885667	no
Npepl1	chr2:174110350-174122702	54.097	44.0139	-0.29759	0.03015	0.151962	no
Etl4	chr2:20289912-20810535	54.0917	57.1864	0.0802652	0.58305	0.886139	no
Id1	chr2:152736250-152737410	54.0831	44.494	-0.281565	0.0931	0.344381	no
Srsf3	chr17:29032659-29043372	54.0204	51.3151	-0.0741221	0.58785	0.888125	no
Ano6	chr15:95790842-95975472	54.0106	59.861	0.148376	0.2848	0.662801	no
Mark3	chr12:111574509-111656227	54.0058	56.5035	0.065228	0.63055	0.905446	no
Acsl3	chr1:78657824-78707743	53.9696	60.0936	0.155065	0.29955	0.677816	no
Tm9sf3	chr19:41210841-41264004	53.9169	52.0221	-0.0516122	0.7164	0.936442	no
Srsf11	chr3:158010492-158036639	53.8928	52.3342	-0.0423408	0.75185	0.946023	no
Anp32e	chr3:95929256-95947387	53.8333	51.6572	-0.0595291	0.654	0.912322	no
Elovl6	chr3:129532385-129638493	53.827	35.6741	-0.593453	5e-05	0.000658218	yes
Klhdc3	chr17:46674550-46705002	53.8267	54.4952	0.0178064	0.93555	0.987928	no
Picalm	chr7:90130231-90209447	53.8102	63.9988	0.250166	0.0648	0.26734	no
Pcyt2	chr11:120610086-120617890	53.8008	61.0513	0.182395	0.1875	0.532029	no
Fam129b	chr2:32876133-32961255	53.7613	67.1988	0.321869	0.03075	0.154297	no
Fam63b	chr9:70599013-70657174	53.75	51.9962	-0.0478583	0.7448	0.944824	no
Lman2	chr13:55343832-55362783	53.7375	48.8914	-0.136347	0.31265	0.689128	no
Lypla2	chr4:135968224-135972594	53.7065	58.8866	0.132842	0.3413	0.719826	no
Crtap	chr9:114368323-114390712	53.6953	62.5974	0.221307	0.10825	0.380361	no
Ostc	chr3:130695916-130709444	53.6135	85.7193	0.677023	5e-05	0.000658218	yes
Naga	chr15:82329531-82338826	53.5981	46.4104	-0.207733	0.13455	0.43863	no
Hadh	chr3:131233419-131272101	53.5666	48.0226	-0.157619	0.2542	0.625496	no
Slc6a6	chr6:91684066-91759063	53.5573	98.2605	0.875529	5e-05	0.000658218	yes
Dpy30	chr17:74299473-74323944	53.5319	55.5157	0.0524984	0.77165	0.952238	no
Ss18	chr18:14625628-14682914	53.4885	39.9814	-0.4199	0.00245	0.0200754	yes
Plp1	chrX:136822745-136838582	53.4587	60.8359	0.186499	0.16845	0.501529	no
Pigt	chr2:164497524-164508301	53.4565	47.3648	-0.174551	0.1892	0.533681	no
Sema3b	chr9:107597673-107609241	53.4499	38.9146	-0.457875	0.00085	0.0081231	yes
Smarca4	chr9:21616168-21704230	53.4228	48.1955	-0.148556	0.2929	0.671727	no
Lgmn	chr12:102394097-102439697	53.4139	40.2157	-0.409455	0.00295	0.0235507	yes
Ncstn	chr1:172066012-172122332	53.4112	53.9102	0.0134144	0.95925	0.992408	no
Pafah1b1	chr11:74673948-74724384	53.3974	63.7938	0.256646	0.06655	0.271403	no
Snrpd1	chr18:10617795-10628230	53.3394	55.0927	0.0466589	0.78195	0.955299	no
Esd	chr14:74732296-74750765	53.3292	82.2359	0.624844	5e-05	0.000658218	yes
Snw1	chr12:87428077-87472299	53.3188	46.0553	-0.211276	0.17855	0.518242	no
Supt5	chr7:28314895-28338719	53.2641	54.8798	0.0431127	0.74965	0.945135	no
Aurkaip1	chr4:155831268-155833098	53.2259	50.6927	-0.0703513	0.6391	0.90786	no
Ago2	chr15:73101624-73184947	53.1736	44.9078	-0.243744	0.0902	0.336632	no
Zwint	chr10:72654845-72674964	53.1693	59.9493	0.17315	0.21325	0.566871	no
Nsmce2	chr15:59374197-59601684	53.1669	50.3892	-0.0774139	0.6102	0.897831	no
Ppm1a	chr12:72761210-72794940	53.1632	51.4076	-0.0484459	0.71635	0.936442	no
Twf1	chr15:94577947-94589824	53.1608	49.4071	-0.105646	0.419	0.785127	no
Gpr155	chr2:73341505-73386480	53.1577	19.9948	-1.41066	5e-05	0.000658218	yes
Hmg20b	chr10:81346045-81350457	53.1405	55.9635	0.0746739	0.60165	0.893318	no
Stim1	chr7:102267823-102436855	53.1269	56.6088	0.091584	0.4997	0.84209	no
Bad	chr19:6938069-6951905	53.1053	52.5842	-0.0142251	0.9422	0.989192	no
Pik3r3	chr4:116221913-116303056	53.1017	34.743	-0.612034	5e-05	0.000658218	yes
Serpinb2	chr1:107511422-107525600	53.0813	56.9197	0.100725	0.4938	0.839731	no
Snhg20	chr11:117076782-117078955	52.9684	43.0536	-0.298997	0.1486	0.466781	no
Col12a1	chr9:79598986-79718722	52.9492	23.882	-1.14868	5e-05	0.000658218	yes
Tnfrsf12a	chr17:23660522-23677449	52.8993	105.553	0.99664	0.0001	0.00122911	yes
Ppp5c	chr7:17004640-17027914	52.8873	53.6831	0.0215487	0.8736	0.977494	no
Zfp385a	chr15:103313894-103340086	52.8809	28.107	-0.911819	5e-05	0.000658218	yes
Ctsc	chr7:88278092-88310875	52.8697	52.4694	-0.010963	0.93615	0.987928	no
Dennd5a	chr7:109893780-109960422	52.8297	49.0654	-0.106644	0.435	0.798095	no
Btg1	chr10:96617000-96622811	52.8047	37.6502	-0.488009	0.00055	0.00563807	yes
Alyref	chr11:120594515-120598365	52.7757	51.9883	-0.0216861	0.88935	0.979279	no
Smim10l1	chr6:133105238-133110899	52.7507	44.182	-0.25573	0.136	0.44081	no
Dtx3	chr10:127190377-127211622	52.7362	62.7487	0.250792	0.2016	0.552464	no
H2afy	chr13:56073621-56135550	52.7083	52.7073	-2.98947e-05	0.9999	0.9999	no
Sf1	chr19:6363689-6378038	52.6785	48.9292	-0.106518	0.4392	0.801563	no
Smad5	chr13:56703009-56742378	52.6711	37.9076	-0.474524	0.00075	0.0073311	yes
Snrpg	chr6:86371539-86378902	52.6685	50.6407	-0.0566446	0.8264	0.967471	no
Ccdc47	chr11:106199355-106216367	52.6295	41.3401	-0.34833	0.0109	0.0692845	no
Rbx1	chr15:81466315-81476369	52.6128	54.9706	0.0632471	0.64945	0.911234	no
Rheb	chr5:24802822-24842361	52.6001	74.8915	0.509737	0.0003	0.00326971	yes
Gtf2f1	chr17:57003401-57011288	52.587	58.4885	0.153446	0.26925	0.647514	no
Plbd2	chr5:120476546-120503623	52.5444	51.0724	-0.0409945	0.76165	0.949691	no
Ebp	chrX:8185328-8193512	52.4618	53.9454	0.0402336	0.7716	0.952238	no
Src	chr2:157424292-157471838	52.4513	41.4472	-0.339702	0.0107	0.068293	no
Churc1	chr12:76765572-76783178	52.4145	56.9174	0.118904	0.5231	0.855814	no
Mrpl36	chr13:73331008-73332178	52.3889	52.8711	0.0132187	0.93585	0.987928	no
Spr	chr6:85133679-85137764	52.3815	46.5565	-0.170075	0.2588	0.632414	no
Dync1li1	chr9:114688830-114723777	52.3677	67.9051	0.374843	0.00595	0.0423285	yes
Purb	chr11:6467598-6476076	52.3589	50.2726	-0.0586622	0.68335	0.922578	no
Tmem205	chr9:21921008-21935872	52.3349	37.9346	-0.464258	0.01055	0.0675091	no
Cdc34	chr10:79682194-79688398	52.3023	47.0647	-0.152228	0.3024	0.68133	no
Tspan4	chr7:141475235-141539857	52.2942	64.7881	0.309078	0.08085	0.312573	no
Impdh2	chr9:108560500-108565566	52.2843	52.6676	0.0105378	0.9394	0.988752	no
Pgk1	chrX:106187099-106203699	52.2692	75.8239	0.536692	5e-05	0.000658218	yes
Map3k11	chr19:5689130-5702864	52.2603	38.8777	-0.426774	0.002	0.0169706	yes
Iars2	chr1:185204167-185329401	52.2094	53.5247	0.0358956	0.8525	0.973909	no
Lamtor4	chr5:138255481-138259395	52.1911	53.5256	0.0364261	0.82505	0.967427	no
Dapl1	chr2:59484652-59505020	52.1901	47.9994	-0.120761	0.54845	0.869392	no
Stat6	chr10:127642985-127666703	52.1873	50.3663	-0.0512391	0.7386	0.943505	no
Luc7l3	chr11:94291138-94321911	52.1697	48.799	-0.0963623	0.48255	0.833963	no
Fam129a	chr1:151571372-151719347	52.1626	114.409	1.13311	5e-05	0.000658218	yes
Hdac2	chr10:36974543-37001888	52.1402	46.3118	-0.171017	0.2115	0.56488	no
Pja2	chr17:64281005-64331883	52.0702	47.4599	-0.133749	0.32995	0.707534	no
Zfand6	chr7:84615053-84679351	52.053	48.8309	-0.0921881	0.51575	0.851873	no
Gusb	chr5:129989020-130002828	52.0387	79.2641	0.607082	5e-05	0.000658218	yes
Wdr61	chr9:54717152-54734549	52.0336	55.6896	0.097964	0.50845	0.847743	no
Chsy3	chr18:59175339-59411336	52.0227	46.9107	-0.149223	0.2664	0.643019	no
Otub1	chr19:7198205-7206284	52.0146	54.4174	0.0651508	0.63885	0.907609	no
Tfg	chr16:56690328-56717450	52.0078	57.3502	0.141071	0.3044	0.681808	no
Suclg1	chr6:73248504-73276907	51.9937	53.6421	0.0450279	0.75715	0.947885	no
Ngfrap1	chrX:136270252-136271978	51.9338	67.6329	0.38105	0.016	0.0932945	no
Ahcyl1	chr3:107663119-107696548	51.9065	50.872	-0.0290449	0.8297	0.967848	no
Dpm2	chr2:32570857-32573571	51.8699	57.0109	0.136341	0.4097	0.777678	no
Cnpy2	chr10:128322458-128327187	51.8635	53.5554	0.0463121	0.767	0.951447	no
Eif1b	chr9:120492605-120495327	51.856	48.0771	-0.109162	0.5117	0.849086	no
Psapl1	chr5:36017180-36398139	51.7838	33.6569	-0.621598	5e-05	0.000658218	yes
Ccnd1	chr7:144929930-144939925	51.7794	163.047	1.65484	5e-05	0.000658218	yes
Tsnax	chr8:125012996-125034192	51.7621	49.9748	-0.050698	0.70535	0.933297	no
Pisd-ps1	chr11:3124020-3193463	51.7477	27.2084	-0.927443	5e-05	0.000658218	yes
Rnpepl1	chr1:92910824-92920585	51.6863	46.7476	-0.144889	0.2784	0.657656	no
Copb1	chr7:114215558-114254680	51.5428	58.5426	0.183716	0.16715	0.498558	no
Vkorc1	chr7:127893062-127895617	51.4699	44.3104	-0.216085	0.2359	0.599603	no
Tmpo	chr10:91147570-91171619	51.4304	48.7772	-0.0764143	0.5693	0.880737	no
Ywhaq	chr12:21390328-21417436	51.3963	54.3048	0.0794143	0.55915	0.875872	no
Flii	chr11:60699689-60727263	51.3655	69.1184	0.428271	0.00655	0.0455783	yes
Babam1	chr8:71396854-71404772	51.3456	49.4389	-0.0545963	0.69915	0.930352	no
Bace1	chr9:45838528-45862484	51.3448	34.3963	-0.577964	5e-05	0.000658218	yes
Kif5b	chr18:6201004-6241524	51.3215	60.1789	0.229697	0.1039	0.370743	no
Sept11	chr5:93093456-93174958	51.3163	62.8868	0.293341	0.0388	0.183981	no
Fcf1	chr12:84970929-84983303	51.2896	57.1129	0.15515	0.38205	0.75628	no
Il10rb	chr16:91406234-91425834	51.2806	40.8141	-0.329347	0.02045	0.112231	no
Ldlr	chr9:21723575-21749918	51.2772	56.2901	0.134563	0.32885	0.705921	no
Gpr137b-ps	chr13:12614064-12650395	51.2361	65.8861	0.362814	0.0071	0.0485349	yes
Nktr	chr9:121719180-121759943	51.1653	50.1829	-0.0279689	0.8424	0.970449	no
Cmpk1	chr4:114960612-114987228	51.1473	62.481	0.288757	0.0321	0.159587	no
Smarcb1	chr10:75896768-75921614	51.1447	57.6231	0.172062	0.2212	0.579809	no
Slc27a4	chr2:29802679-29817522	51.1124	43.1103	-0.24564	0.06855	0.277282	no
Got2	chr8:95864136-95888365	51.1093	53.812	0.0743422	0.5811	0.885822	no
Mrps24	chr11:5703982-5707699	51.1015	55.1369	0.109652	0.49165	0.838602	no
Trappc4	chr9:44403758-44407548	51.0896	56.8579	0.154331	0.30125	0.679949	no
Ap2b1	chr11:83302696-83405033	51.0849	60.1999	0.236864	0.09075	0.337802	no
Pla2g15	chr8:106150398-106164715	51.0834	38.4754	-0.408918	0.00395	0.0300646	yes
Luc7l2	chr6:38551443-38609470	51.0829	49.5233	-0.0447337	0.7582	0.948438	no
Map7d1	chr4:126232167-126256319	51.0781	85.0511	0.735625	5e-05	0.000658218	yes
Dhrs7	chr12:72650352-72664828	51.0685	28.1264	-0.860509	5e-05	0.000658218	yes
Snapc5	chr9:64179296-64182688	51.0215	58.0001	0.184952	0.28185	0.659545	no
Bccip	chr7:133709332-133881532	51.021	64.4612	0.33734	0.0438	0.201234	no
Anapc2	chr2:25272465-25285916	50.9475	50.8409	-0.00302189	0.98155	0.996386	no
Gnl3	chr14:30999825-31019131	50.8847	51.3929	0.0143357	0.9535	0.990793	no
Poldip2	chr11:78512295-78522736	50.8755	41.1304	-0.306764	0.02925	0.148208	no
Atxn7l3b	chr10:112925427-112929026	50.8118	37.1552	-0.4516	0.0011	0.010183	yes
Pcbp4	chr9:106453837-106465940	50.7929	60.5073	0.252482	0.06805	0.275619	no
Usp4	chr9:108347830-108392529	50.7745	49.5513	-0.0351822	0.79425	0.959977	no
Mapk6	chr9:75386781-75410016	50.7741	45.2185	-0.16718	0.21975	0.577961	no
Mrpl53	chr6:83101515-83109932	50.7241	57.3682	0.177582	0.4132	0.780004	no
Trpc4ap	chr2:155611242-155692384	50.677	52.6402	0.0548341	0.68305	0.922474	no
Tmem97	chr11:78541816-78550735	50.6165	48.2653	-0.0686221	0.64225	0.90911	no
Ddx21	chr10:62580246-62602298	50.583	51.7068	0.0317018	0.8148	0.966139	no
Dsc3	chr18:19960929-20002097	50.5795	46.3989	-0.12446	0.38345	0.757021	no
Chmp2b	chr16:65539132-65562697	50.5305	51.9142	0.0389751	0.7741	0.952675	no
Rab18	chr18:6765166-6791606	50.5152	46.9831	-0.104574	0.4472	0.80756	no
Reep3	chr10:67005074-67096988	50.4953	41.2699	-0.291059	0.0325	0.160931	no
Eif4ebp2	chr10:61432496-61452669	50.4894	42.9663	-0.232775	0.0991	0.359821	no
Bud31	chr5:145140396-145167104	50.4712	56.1197	0.153046	0.4835	0.834444	no
Slk	chr19:47580018-47645246	50.4429	60.3065	0.257661	0.0715	0.285494	no
G6pc3	chr11:102189698-102194081	50.425	43.9729	-0.197524	0.16855	0.501529	no
Erbb2ip	chr13:103818785-103920586	50.4118	53.6288	0.0892467	0.52505	0.857064	no
Iscu	chr5:113772811-113778282	50.3868	59.1946	0.232422	0.15525	0.47973	no
Tmod1	chr4:46039221-46138475	50.3635	65.9076	0.388068	0.01305	0.0796865	no
Hnrnpc	chr14:52073379-52104028	50.33	49.3478	-0.0284335	0.8367	0.969407	no
R3hdm4	chr10:79697304-80369637	50.2701	49.4399	-0.0240223	0.9884	0.997084	no
1110038B12Rik	chr17:34950235-34952471	50.2531	59.2783	0.238291	0.27755	0.657281	no
Gmfb	chr14:46808148-46822242	50.2459	55.4121	0.141196	0.29635	0.674892	no
Dock7	chr4:98936658-99120915	50.2033	35.938	-0.482273	0.00045	0.00470227	yes
Lamtor5	chr3:107278857-107284081	50.176	50.3523	0.00506107	0.97615	0.995721	no
Plxnd1	chr6:115954810-115995005	50.1689	35.6041	-0.494751	0.00025	0.00280352	yes
Snx6	chr12:54746356-54795662	50.1427	58.9033	0.232311	0.0882	0.331994	no
Ubqln1	chr13:58176155-58215653	50.1306	51.2934	0.0330841	0.80895	0.964766	no
Ddx6	chr9:44604891-44640731	50.1279	47.1673	-0.0878272	0.5346	0.862351	no
Ubxn6	chr17:56068252-56074989	50.1222	52.2554	0.0601304	0.6643	0.914777	no
1810022K09Rik	chr3:14578670-14611256	50.0446	54.6997	0.128317	0.67995	0.920691	no
Copg1	chr6:87887939-87913594	50.0361	56.0973	0.16496	0.23045	0.591932	no
Phldb3	chr7:24611327-24629297	49.9948	64.7676	0.373495	0.00645	0.0450846	yes
Mpv17l2	chr8:70754678-70760921	49.9886	45.866	-0.124176	0.47955	0.831792	no
Rad23b	chr4:55350041-55392237	49.9317	53.3301	0.0949932	0.47785	0.830119	no
March5	chr19:37207544-37224457	49.9024	43.0401	-0.213427	0.1966	0.544897	no
Slc6a8	chrX:73673132-73682500	49.878	64.8578	0.378876	0.00505	0.0372052	yes
Lmf1	chr17:25579173-25662826	49.8628	43.9402	-0.182422	0.19545	0.543964	no
Ndrg3	chr2:156927341-156992111	49.8599	75.2071	0.592991	5e-05	0.000658218	yes
S100b	chr10:76253835-76261319	49.8525	8.40268	-2.56874	5e-05	0.000658218	yes
Zyx	chr6:42349827-42380558	49.8516	80.0809	0.68382	5e-05	0.000658218	yes
Trappc6b	chr12:59043091-59061472	49.8428	50.3885	0.0157109	0.91615	0.982547	no
Ube2g2	chr10:77622320-77645990	49.7685	50.3736	0.0174353	0.8989	0.98099	no
Tmed7	chr18:46585927-46597535	49.7034	41.0862	-0.274689	0.04135	0.193413	no
Memo1	chr17:74200699-74294863	49.6906	53.7182	0.112436	0.42745	0.791168	no
Cab39	chr1:85793446-85851577	49.6357	49.661	0.000734463	0.9959	0.998962	no
Pisd	chr5:32736313-32785626	49.6318	46.2784	-0.100925	0.4586	0.816341	no
Stxbp2	chr8:3631159-3643644	49.562	47.9065	-0.0490153	0.71255	0.935547	no
Tars	chr15:11383662-11399658	49.5498	55.4799	0.163086	0.2249	0.585429	no
Acat2	chr17:12943041-12960725	49.5316	51.44	0.0545423	0.6873	0.924693	no
Ccdc23	chr4:119195309-119201298	49.5122	63.4958	0.358878	0.03945	0.186494	no
Ogt	chrX:101640050-101684351	49.4952	42.6908	-0.213363	0.12125	0.409689	no
Eprs	chr1:185363094-185428355	49.4794	55.5567	0.167131	0.2253	0.585733	no
Wscd1	chr11:71750702-71789646	49.4723	24.8464	-0.993583	5e-05	0.000658218	yes
Tmem30a	chr9:79768940-79793430	49.3768	52.5597	0.0901225	0.50445	0.844765	no
Mob1a	chr6:83326038-83340949	49.3724	46.2322	-0.0948069	0.50625	0.846181	no
Rnf4	chr5:34336249-34353445	49.3679	53.5454	0.117187	0.38535	0.759444	no
Dpy19l1	chr9:24411778-24503140	49.3552	49.7499	0.0114898	0.9299	0.986195	no
2610507B11Rik	chr11:78261753-78290625	49.3033	44.7461	-0.139921	0.3215	0.699089	no
Adgra2	chr5:49959950-50058996	49.3	85.1576	0.788546	5e-05	0.000658218	yes
Sppl2b	chr10:80855274-80868708	49.2961	40.5554	-0.281577	0.0386	0.183383	no
Ifrd1	chr12:40203128-40223189	49.295	81.8256	0.731113	5e-05	0.000658218	yes
Suds3	chr5:117091677-117115993	49.211	45.1743	-0.12348	0.36605	0.742022	no
Vmp1	chr11:86583864-87555823	49.1935	57.6772	0.229535	0.6796	0.920657	no
Cisd1	chr10:71330493-71344849	49.1687	54.4726	0.147791	0.36145	0.738152	no
Ptpn11	chr5:121130532-121191397	49.1664	52.6295	0.098199	0.4785	0.830667	no
Mylip	chr13:45389741-45411940	49.1384	30.5041	-0.687845	5e-05	0.000658218	yes
Aspscr1	chr11:120672972-120709446	49.1115	48.5233	-0.0173827	0.9002	0.98099	no
Nubp2	chr17:24882610-24886350	49.0692	47.7677	-0.0387843	0.78755	0.958777	no
Ppt1	chr4:122836226-122886057	49.0577	50.3712	0.0381205	0.92965	0.986098	no
Rab21	chr10:115289861-115315591	49.0483	50.4062	0.0393959	0.7803	0.954773	no
Eid1	chr2:125627446-125724148	49.0353	46.6364	-0.0723644	0.7912	0.959286	no
Pdia4	chr6:47796140-47813512	49.02	54.5912	0.155297	0.25305	0.624027	no
Rars	chr11:35808380-35834528	49.0026	58.0906	0.245447	0.0741	0.292675	no
Golph3	chr15:12321495-12351267	48.9303	49.1569	0.0066675	0.9628	0.99279	no
Nop58	chr1:59685005-59711510	48.9175	50.8503	0.055907	0.69145	0.926061	no
Rab11a	chr9:64715299-64737756	48.9013	56.8079	0.216219	0.11085	0.386109	no
Ryk	chr9:102834919-102908307	48.8955	38.8664	-0.331178	0.01305	0.0796865	no
Atp2c1	chr9:105411361-105521257	48.8719	42.5577	-0.199585	0.16855	0.501529	no
Mvk	chr5:114444268-114460590	48.856	45.2924	-0.109267	0.4437	0.804924	no
Ndufs1	chr1:63114470-63176822	48.8516	51.3698	0.072514	0.5965	0.891957	no
Spred1	chr2:117121070-117182277	48.8159	28.1621	-0.793598	5e-05	0.000658218	yes
Matr3	chr18:35562157-35592045	48.8021	48.7204	-0.00241734	0.98535	0.997084	no
Klhl5	chr5:65131230-65168142	48.7328	46.1244	-0.0793649	0.5525	0.871172	no
Bub3	chr7:131560390-131571898	48.7311	49.2853	0.0163133	0.90645	0.98099	no
Rabgef1	chr5:130171818-130214337	48.7267	33.004	-0.562074	5e-05	0.000658218	yes
Cyhr1	chr15:76643394-76660208	48.7082	41.0937	-0.245245	0.12625	0.420684	no
Tuba1b	chr15:98931430-98934390	48.6734	38.7996	-0.32709	0.02715	0.139909	no
Snx2	chr18:53176364-53220860	48.6351	57.581	0.243596	0.0761	0.298674	no
Cnn2	chr10:79697304-80369637	48.6268	216.215	2.15264	0.17955	0.519929	no
Ppp3ca	chr3:136670065-136937727	48.6189	41.5047	-0.228243	0.08945	0.334972	no
Bcas2	chr3:103171710-103179154	48.5522	50.1926	0.0479378	0.7402	0.944086	no
G3bp1	chr11:55469751-55500887	48.5407	52.2036	0.104953	0.43335	0.796389	no
Hsd17b4	chr18:50128200-50196270	48.4843	42.8898	-0.176881	0.1872	0.531663	no
Fntb	chr12:76837466-76921412	48.2906	27.18	-0.829198	5e-05	0.000658218	yes
Tubb2a	chr13:34074279-34078008	48.274	80.5048	0.737827	5e-05	0.000658218	yes
Vcan	chr13:89655309-89742512	48.2268	22.9168	-1.07343	5e-05	0.000658218	yes
Mrps12	chr7:28739640-28741781	48.1697	45.5206	-0.0816057	0.6574	0.91277	no
Srrt	chr5:137295703-137307674	48.1555	47.8143	-0.0102596	0.94145	0.989192	no
Cdk11b	chr4:155624868-155649932	48.1403	49.3126	0.0347131	0.79135	0.959286	no
Dars	chr1:128363706-128417416	48.0617	46.0281	-0.0623721	0.6458	0.909923	no
Cerk	chr15:86139100-86186141	48.0414	47.2873	-0.0228255	0.86595	0.977149	no
Spag9	chr11:93996090-94126082	48.0084	60.2693	0.328136	0.0224	0.120378	no
Zmynd11	chr13:9684835-9765314	48.0066	43.6076	-0.138652	0.3028	0.68133	no
Glo1	chr17:30592861-30612659	47.992	46.2671	-0.0528066	0.7337	0.941898	no
Shmt2	chr10:127514938-127522444	47.9899	44.8588	-0.0973389	0.51975	0.854819	no
Sec62	chr3:30792875-30821263	47.9894	47.0106	-0.0297288	0.82555	0.967427	no
Polr1d	chr5:147077345-147111361	47.9793	61.9808	0.369409	0.02345	0.124939	no
Araf	chrX:20848542-20920918	47.9544	50.4199	0.0723297	0.6333	0.905446	no
Cat	chr2:103453903-103485153	47.9511	42.2804	-0.181576	0.1802	0.520718	no
Pdxdc1	chr16:13819276-13903145	47.9417	40.2472	-0.252394	0.0969	0.35432	no
Insig2	chr1:121304352-121332589	47.9304	39.9237	-0.263697	0.0595	0.251407	no
Pnn	chr12:59066918-59074017	47.9191	41.5708	-0.205029	0.13245	0.433949	no
Celf2	chr2:6539698-7396198	47.8274	43.6937	-0.130414	0.3687	0.744214	no
Cops5	chr1:10024599-10038159	47.8128	57.5955	0.268559	0.055	0.237485	no
Acbd6	chr1:155558119-155687233	47.7699	45.247	-0.078281	0.6223	0.903021	no
Atad1	chr19:32672562-32712298	47.7596	42.92	-0.154142	0.25425	0.625496	no
Sec31a	chr5:100361648-100416234	47.7587	51.1073	0.0977644	0.4689	0.822778	no
Pbxip1	chr3:89436703-89450952	47.7483	48.4983	0.022485	0.8672	0.977221	no
Sucla2	chr14:73552785-73596142	47.7478	54.0686	0.179355	0.18215	0.523549	no
Scarb2	chr5:92443872-92505608	47.7465	65.6907	0.460294	0.00065	0.006476	yes
Ehmt2	chr17:34898491-34914050	47.7288	50.1462	0.0712798	0.60625	0.895492	no
Sbds	chr5:130245731-130255462	47.6573	50.7837	0.09167	0.52845	0.859193	no
Egln2	chr7:27158657-27166802	47.5896	47.4512	-0.00420073	0.975	0.995518	no
Zc3h7a	chr16:11136593-11176393	47.5843	42.9358	-0.148302	0.2676	0.644791	no
Mtfr1l	chr4:134525554-134535387	47.5681	47.7575	0.00573472	0.9685	0.994229	no
Hmox1	chr8:75093617-75100593	47.5047	50.3506	0.0839378	0.55875	0.875702	no
Plxna1	chr6:89316313-89362613	47.502	46.8419	-0.0201871	0.89035	0.979297	no
Hexb	chr13:97137936-97198357	47.5	46.543	-0.0293651	0.8577	0.974907	no
Naa50	chr16:44139808-44163364	47.4676	45.5443	-0.0596744	0.6557	0.91254	no
Arhgap1	chr2:91650117-91672320	47.4629	89.0334	0.907546	5e-05	0.000658218	yes
Vasp	chr7:19256929-19271854	47.417	92.4164	0.962744	5e-05	0.000658218	yes
Sh3glb1	chr3:144683677-144720335	47.3667	55.5883	0.230908	0.1173	0.401147	no
Zc3h11a	chr1:133619870-133661399	47.3111	47.3008	-0.00031311	0.9985	0.999394	no
Hebp1	chr6:135137518-135168215	47.2972	43.1195	-0.133416	0.4128	0.780004	no
Hddc2	chr10:31313404-31328086	47.2871	29.878	-0.66236	0.0011	0.010183	yes
Dctn5	chr7:122133040-122149044	47.1733	48.3352	0.0351049	0.80435	0.962707	no
Cnppd1	chr1:75135214-75142368	47.1696	68.7723	0.543971	0.0001	0.00122911	yes
Sorbs1	chr19:40292039-40513812	47.1557	50.3325	0.0940562	0.49575	0.840801	no
Myo1c	chr11:75651508-75674634	47.1219	79.03	0.746002	5e-05	0.000658218	yes
Ndfip2	chr14:105258672-105309298	47.1213	65.8229	0.482211	0.0006	0.00608033	yes
Lasp1	chr11:97799671-97838764	47.0954	78.1562	0.730776	5e-05	0.000658218	yes
Anpep	chr7:79821802-79842352	47.0743	51.081	0.117848	0.3917	0.763931	no
Mtap	chr4:89137369-89181090	47.0495	49.8515	0.0834556	0.5336	0.862351	no
Sdf2l1	chr16:17130137-17132383	47.0356	51.2007	0.122409	0.436	0.798749	no
Cers5	chr15:99735591-99772515	47.0254	62.3036	0.405873	0.00325	0.0254706	yes
Mrpl28	chr17:26123502-26126613	46.9985	46.508	-0.0151338	0.9282	0.985349	no
Gnb4	chr3:32583527-32616535	46.9202	82.2664	0.810095	5e-05	0.000658218	yes
Rbm25	chr12:83632233-83683123	46.901	41.5207	-0.175787	0.19295	0.538992	no
Fnta	chr8:25998721-26015601	46.8983	54.3519	0.212795	0.12015	0.407303	no
Prpf38b	chr3:108902806-108911704	46.8592	45.6743	-0.0369479	0.7867	0.958273	no
Ube2e2	chr14:18573576-18893627	46.8558	37.1444	-0.335083	0.02895	0.147048	no
Rps6ka3	chrX:159255781-159368244	46.8158	49.4504	0.0789877	0.57825	0.885129	no
Dgcr6	chr16:18052859-18071632	46.7983	41.2551	-0.181882	0.23055	0.591944	no
Rrp7a	chr15:83100204-83122801	46.7979	55.186	0.237858	0.13925	0.448883	no
Tusc3	chr8:39005866-39130817	46.7953	64.636	0.465975	0.00215	0.0180095	yes
Serpinb3b	chr1:107153960-107161114	46.7321	47.289	0.0170918	0.90645	0.98099	no
Papola	chr12:105784701-105838943	46.7238	50.3253	0.107125	0.43065	0.793541	no
Sar1b	chr11:51763662-51791953	46.7095	45.0122	-0.0533978	0.7265	0.939651	no
Timm50	chr7:28305825-28312046	46.7077	52.1996	0.160379	0.2968	0.67506	no
Coq7	chr7:118509658-118533356	46.6794	49.1091	0.0732057	0.6618	0.91396	no
Pfdn1	chr18:36403678-36454495	46.6699	50.5197	0.114355	0.46615	0.821113	no
Prkacb	chr3:146729578-146812946	46.6535	41.2911	-0.176157	0.19185	0.537492	no
Ncln	chr10:81486458-81496363	46.6472	45.7636	-0.0275897	0.8354	0.968948	no
Smim4	chr14:31019137-31128930	46.6379	40.4204	-0.206417	0.7377	0.943224	no
1810009A15Rik	chr19:8883877-8890759	46.631	52.0617	0.158933	0.4107	0.778624	no
Parva	chr7:112427705-112591688	46.6273	43.1402	-0.112144	0.40985	0.77782	no
Nras	chr3:103058284-103067914	46.5399	44.0661	-0.0787988	0.55755	0.874912	no
Snhg1	chr19:8723486-8726326	46.4963	47.7869	0.0395001	0.86875	0.977265	no
Aacs	chr5:125475872-125517403	46.4894	62.1609	0.419105	0.00265	0.0214453	yes
Noc2l	chr4:156236009-156255338	46.4602	49.5994	0.0943264	0.4862	0.834634	no
U2af1	chr17:31647081-31658754	46.4289	48.5262	0.0637396	0.70715	0.93369	no
Top2b	chr14:16365205-16430787	46.4164	40.1883	-0.207859	0.12355	0.414863	no
Xrn2	chr2:147013059-147077997	46.4147	42.6141	-0.123253	0.3518	0.728846	no
Dcaf11	chr14:55560028-55570065	46.3878	44.6232	-0.05595	0.6871	0.924624	no
Khdrbs1	chr4:129703168-129742303	46.3587	41.293	-0.166941	0.22205	0.581301	no
Marc2	chr1:184813067-184845847	46.3529	40.3709	-0.199345	0.1573	0.48275	no
Abi1	chr2:22895521-23040241	46.3454	46.5275	0.00565891	0.97255	0.994633	no
Zmat2	chr18:36793922-36799660	46.3432	41.0124	-0.176298	0.1985	0.546988	no
Mrps6	chr16:92058321-92112227	46.3104	84.8103	0.872905	5e-05	0.000658218	yes
Vdac3	chr8:22577074-22593813	46.2882	44.9004	-0.0439144	0.7606	0.949526	no
Gas6	chr8:13465373-13494535	46.2807	34.4545	-0.425718	0.00245	0.0200754	yes
Rab35	chr5:115631986-115647158	46.2569	45.5135	-0.0233733	0.86225	0.976462	no
Ddx23	chr15:98645506-98662889	46.2454	50.2078	0.118603	0.37765	0.753237	no
Mgrn1	chr16:4886099-4941020	46.1747	49.3506	0.0959647	0.6324	0.905446	no
Acot9	chrX:155262499-155297507	46.1581	50.5801	0.131984	0.35065	0.727313	no
Myo10	chr15:25622549-25813671	46.1172	39.5804	-0.220518	0.1142	0.39369	no
Dhrs1	chr14:55739019-55745684	46.0841	47.7346	0.0507685	0.73285	0.941803	no
Ddx39	chr8:83715176-83741311	46.0299	43.4294	-0.0838986	0.87375	0.977494	no
Txndc15	chr13:55714649-55726228	46.0041	37.9992	-0.275794	0.06185	0.258817	no
Rpa1	chr11:75300258-75348383	45.9938	88.205	0.939421	5e-05	0.000658218	yes
Coro7	chr16:4626883-4679720	45.9893	37.5715	-0.291659	0.03015	0.151962	no
Ndufs5	chr4:123712709-123718186	45.9528	36.5833	-0.328966	0.1817	0.523104	no
Supt4a	chr11:87737564-87743617	45.9302	48.2143	0.0700182	0.7112	0.935356	no
Yipf1	chr4:107314362-107359823	45.922	41.2219	-0.155773	0.2984	0.676447	no
Yif1b	chr7:29238322-29248467	45.9194	56.0777	0.288323	0.0625	0.260711	no
Ptprj	chr2:90429755-90580647	45.8935	45.1927	-0.0221989	0.88355	0.978016	no
Ptprs	chr17:56412425-56476480	45.8786	45.3453	-0.0168691	0.9004	0.98099	no
Axin2	chr11:108920348-108950781	45.8774	36.7486	-0.320094	0.0183	0.103544	no
Acbd3	chr1:180726042-180754204	45.8317	40.9096	-0.163904	0.22905	0.589678	no
Prodh	chr16:18071725-18089190	45.8287	29.9466	-0.613859	5e-05	0.000658218	yes
Edem3	chr1:151755373-151822328	45.8022	29.4611	-0.636606	5e-05	0.000658218	yes
Mrps16	chr14:20391230-20393555	45.786	53.3827	0.221464	0.2695	0.647865	no
Cdipt	chr7:126975913-126980501	45.7531	48.1381	0.0733083	0.5869	0.888096	no
Prkaca	chr8:83972977-83996442	45.7481	44.0024	-0.0561318	0.6812	0.921715	no
Gnptg	chr17:25188399-25240116	45.7466	46.2251	0.0150128	0.9272	0.985099	no
Alg5	chr3:54735538-54749795	45.7384	43.4589	-0.0737542	0.61895	0.902048	no
Ddah1	chr3:145758691-145894277	45.7266	43.0689	-0.0863851	0.53	0.859911	no
Esyt1	chr10:128510249-128525859	45.6629	59.8869	0.391217	0.004	0.0303892	yes
Dcps	chr9:35046578-35175987	45.6545	45.589	-0.00207154	0.99275	0.998865	no
4833439L19Rik	chr13:54503804-54565382	45.638	39.5707	-0.205805	0.15115	0.47157	no
Acsl5	chr19:55253368-55296628	45.6181	45.0765	-0.0172329	0.90025	0.98099	no
Fbxo7	chr10:86021928-86048328	45.6077	46.9853	0.042935	0.75725	0.947885	no
Safb	chr17:56584981-56606294	45.5976	37.9143	-0.266216	0.04725	0.213295	no
Cdc123	chr2:5794293-5844960	45.5805	47.745	0.0669333	0.6402	0.907968	no
Sf3b3	chr8:110810491-110846803	45.5655	43.678	-0.0610342	0.6572	0.91277	no
Trap1	chr16:4037144-4077810	45.543	44.194	-0.0433789	0.75175	0.945993	no
Ppic	chr18:53406340-53418007	45.5354	54.1604	0.250248	0.0936	0.345716	no
Marveld1	chr19:42147388-42151703	45.5147	53.1349	0.223328	0.098	0.356871	no
Rbm17	chr2:11585438-11603199	45.5004	44.7695	-0.0233621	0.8727	0.977494	no
Ankrd40	chr11:94328000-94341847	45.4953	44.0039	-0.048086	0.75155	0.945993	no
Scp2	chr4:108043829-108118547	45.4677	45.9588	0.0154977	0.90565	0.98099	no
Tmem134	chr19:4125959-4132307	45.4666	46.7072	0.0388403	0.7925	0.959533	no
Fastk	chr5:24441039-24445235	45.4289	46.9742	0.0482578	0.7261	0.93959	no
Grsf1	chr5:88659232-88676171	45.4243	45.6131	0.0059838	0.96595	0.993295	no
Lrrc8b	chr5:105415774-105486189	45.4099	48.1269	0.0838368	0.5339	0.862351	no
Mvb12a	chr8:71542929-71548026	45.397	42.7359	-0.0871488	0.59205	0.889688	no
Bcl7c	chr7:127704977-127708766	45.3571	43.3487	-0.0653398	0.6949	0.928278	no
Smim14	chr5:65448754-65492835	45.3557	49.3627	0.122136	0.37825	0.753828	no
Prkd3	chr17:78949404-79020816	45.3441	33.8692	-0.420938	0.00195	0.0166145	yes
Nmt1	chr11:103028561-103066105	45.313	53.4004	0.236926	0.08875	0.333558	no
Tceb1	chr1:16642764-16656865	45.258	47.0313	0.0554489	0.73895	0.943758	no
Vps11	chr9:44348104-44361670	45.2512	47.8548	0.0807059	0.5454	0.868025	no
Fbl	chr7:28169747-28179269	45.1898	37.7911	-0.257948	0.10625	0.375245	no
Nomo1	chr7:46033695-46084212	45.1825	49.1504	0.12144	0.36465	0.741045	no
Pmvk	chr3:89459117-89469009	45.1605	41.2991	-0.12895	0.41315	0.780004	no
Plekhb2	chr1:34849958-34879585	45.1383	51.3634	0.18639	0.1654	0.49623	no
Agfg1	chr1:82839482-82896275	45.1251	57.216	0.342487	0.01185	0.0739969	no
Stra13	chr11:120710940-120713767	45.1045	43.6152	-0.0484408	0.8081	0.964766	no
Sdccag3	chr2:26382799-26389316	45.1	45.2063	0.00339518	0.98155	0.996386	no
Ostf1	chr19:18580363-18631813	45.0783	52.8425	0.229266	0.1021	0.366639	no
Sh3kbp1	chrX:159627271-159975920	45.0501	49.979	0.14979	0.27705	0.65648	no
Deptor	chr15:55099916-55259273	45.0459	28.4774	-0.661576	5e-05	0.000658218	yes
Josd2	chr7:44467979-44471658	45.0288	38.9373	-0.209697	0.22585	0.586181	no
Cdk2ap2	chr19:4097350-4099017	44.9886	63.7577	0.50304	0.00245	0.0200754	yes
Hddc3	chr7:80343136-80346097	44.9677	41.1657	-0.127445	0.4748	0.8276	no
Ola1	chr2:73092800-73214447	44.9468	48.7747	0.117914	0.4223	0.788167	no
Nabp2	chr10:128401394-128409796	44.9258	51.718	0.203123	0.20835	0.561054	no
Strn4	chr7:16809266-16840931	44.9233	42.6455	-0.0750717	0.62745	0.904644	no
Emc2	chr15:43477228-43527777	44.9051	50.1713	0.159983	0.29285	0.671727	no
Itm2c	chr1:85894509-85908698	44.9013	45.2084	0.00983401	0.9438	0.989192	no
Btbd3	chr2:138256583-138287422	44.777	57.4757	0.360194	0.00905	0.0592859	no
2510039O18Rik	chr4:147940894-147947314	44.7732	48.0433	0.1017	0.4506	0.810191	no
Pitpna	chr11:75588107-75628778	44.7607	49.0021	0.130613	0.337	0.715237	no
Tra2a	chr6:49243920-49264052	44.7594	44.2413	-0.0167976	0.90465	0.98099	no
Spcs2	chr7:99837568-99858883	44.7563	48.3091	0.110203	0.41125	0.779187	no
Gbas	chr5:129725074-129758325	44.7445	43.2575	-0.0487611	0.72445	0.93876	no
AI413582	chr17:27563768-27565727	44.7374	67.9384	0.602746	0.00125	0.0113598	yes
Fibp	chr19:5460606-5465052	44.6865	48.4565	0.116853	0.4509	0.810351	no
Man2a2	chr7:80349096-80371375	44.6542	32.3621	-0.46449	0.00075	0.0073311	yes
Gpsm2	chr3:108653912-108722299	44.633	23.6173	-0.918269	5e-05	0.000658218	yes
Spns1	chr7:126370059-126377934	44.6301	49.7515	0.156723	0.24715	0.615965	no
Stk24	chr14:121286340-121379230	44.6031	42.6156	-0.0657635	0.62385	0.90329	no
Cul1	chr6:47454323-47526139	44.5976	47.6516	0.0955582	0.4804	0.832539	no
Odc1	chr12:17544872-17551502	44.5851	38.5041	-0.211549	0.12195	0.411271	no
Ift20	chr11:78536435-78541473	44.5606	47.0765	0.0792384	0.66345	0.914611	no
[truncated: 12,462 more rows]

## Sheet: Table 1b
Table 1b. Differentially expressed genes down-regulated in GNAQ-Q209L IFE melanocytes, sorted by z_score
Gene	Name	WT_17_11	WT_11_12	WT_27_4	GQ_27_11	GQ_17_11	GQ_25_6	Significant	Q_value	WT_FPKM	GQ_FPKM	Log2(GQ/WT)	Z_score
Ptgds	prostaglandin D2 synthase (brain)	4224.13	2841.54	5522.32	1291.42	1355.16	942.179	yes	0.000658218	4196	1196.25	-1.81049	-40.8507
Mlana	melan-A	4238.26	2736.2	4251.79	1374.82	1700.71	1791.91	yes	0.000658218	3742.08	1622.48	-1.20564	-28.9393
Trpm1	transient receptor potential cation channel, subfamily M, member 1	1063.15	660.332	1324.52	438.145	540.727	562.437	yes	0.00978581	1016	513.77	-0.983708	-12.8408
Sepp1	selenoprotein P	434.962	227.618	424.288	105.376	92.5221	76.9639	yes	0.000658218	362.289	91.6207	-1.9834	-12.7044
Ednrb	endothelin receptor type B	496.547	379.252	472.622	120.542	137.16	166.039	yes	0.000658218	449.474	141.247	-1.67002	-12.6817
Kit	KIT proto-oncogene receptor tyrosine kinase	378.107	344.962	404.602	126.181	113.305	121.275	yes	0.000658218	375.89	120.254	-1.64423	-11.4768
S100a1	S100 calcium binding protein A1	665.483	431.872	612.95	302.708	344.194	257.513	yes	0.000658218	570.102	301.472	-0.919197	-9.09919
Idh2	isocitrate dehydrogenase 2 (NADP+), mitochondrial	441.453	359.823	528.04	242.851	258.772	222.795	yes	0.000658218	443.105	241.473	-0.87579	-7.70636
Slc7a5	solute carrier family 7 (cationic amino acid transporter, y+ system), member 5	791.523	513.007	736.105	390.736	416.442	475.334	yes	0.0428191	680.212	427.504	-0.670046	-7.59284
Apoe	apolipoprotein E	784.321	671.307	853.64	481.599	584.105	442.785	yes	0.00122911	769.756	502.83	-0.614331	-7.48252
Car14	carbonic anhydrase 14	119.636	84.2332	130.794	32.1011	26.9149	14.0055	yes	0.000658218	111.554	24.3405	-2.19632	-7.48142
Cthrc1	collagen triple helix repeat containing 1	130.968	83.8223	151.084	24.2128	32.2252	32.9729	yes	0.000658218	121.958	29.8036	-2.03283	-7.48058
Id3	inhibitor of DNA binding 3	217.818	128.276	222.099	72.6201	76.4821	60.6885	yes	0.000658218	189.398	69.9302	-1.43743	-7.41865
Enpp2	ectonucleotide pyrophosphatase/phosphodiesterase 2	96.0868	84.1487	87.9795	15.5301	15.689	13.4815	yes	0.000658218	89.405	14.9002	-2.58502	-7.2951
Mgst1	microsomal glutathione S-transferase 1	254.408	216.377	231.683	105.141	110.432	94.7331	yes	0.000658218	234.156	103.435	-1.17874	-7.11457
Krt36	keratin 36	302.157	124.809	508.655	108.486	207.498	161.076	yes	0.000658218	311.874	159.02	-0.971754	-7.04392
Cdh3	cadherin 3	144.613	125.308	153.599	40.8726	50.0771	53.3031	yes	0.000658218	141.173	48.0843	-1.55383	-6.76662
Cyb5a	cytochrome b5 type A (microsomal)	582.648	377.124	521.277	306.196	331.92	274.477	yes	0.000658218	493.683	304.198	-0.698576	-6.70821
Lgals3bp	lectin, galactoside-binding, soluble, 3 binding protein	105.214	82.8438	127.423	23.2842	24.9392	41.6906	yes	0.000658218	105.16	29.9713	-1.81093	-6.46808
Mcoln3	mucolipin 3	408.368	322.794	442.905	237.788	239.449	222.376	yes	0.000658218	391.356	233.204	-0.746886	-6.32828
Krt84	keratin 84	202.147	83.0036	402.173	86.8174	152.235	105.665	yes	0.000658218	229.108	114.906	-0.995575	-6.15724
Pcolce2	procollagen C-endopeptidase enhancer 2	162.182	140.3	179.149	57.2181	68.34	78.1445	yes	0.000658218	160.544	67.9009	-1.24146	-6.12945
Bmyc	brain expressed myelocytomatosis oncogene	188.37	157.009	229.534	64.676	95.3531	110.21	yes	0.000658218	191.638	90.0797	-1.08911	-6.05072
Bst2	bone marrow stromal cell antigen 2	126.187	68.8489	169.536	24.3623	26.0718	83.1834	yes	0.000658218	121.524	44.5392	-1.44809	-5.97404
Aebp1	AE binding protein 1	215.343	173.815	253.915	119.184	109.471	93.8822	yes	0.000658218	214.358	107.512	-0.995517	-5.95546
Pmp22	peripheral myelin protein 22	208.928	113.532	223.162	91.0824	73.8235	90.1725	yes	0.000658218	181.874	85.0261	-1.09696	-5.9281
Abat	4-aminobutyrate aminotransferase	84.3282	55.4598	101.684	20.5736	23.0981	20.1648	yes	0.000658218	80.4907	21.2788	-1.9194	-5.86948
Sdpr	caveolae associated 2	114.659	93.8427	97.9653	35.9206	41.7387	27.3071	yes	0.000658218	102.156	34.9888	-1.5458	-5.73543
S100b	S100 protein, beta polypeptide, neural	53.2918	47.6851	48.5806	9.51134	11.4894	4.20731	yes	0.000658218	49.8525	8.40268	-2.56874	-5.43069
Fos	FBJ osteosarcoma oncogene	596.975	486.562	497.708	362.397	406.999	344.331	yes	0.0241471	527.082	371.242	-0.505665	-5.19949
Plat	plasminogen activator, tissue	201.163	140.561	178.979	96.8148	85.603	85.6015	yes	0.000658218	173.568	89.3398	-0.958124	-5.19463
Qpct	glutaminyl-peptide cyclotransferase (glutaminyl cyclase)	340.666	201.268	333.935	158.603	184.404	208.299	yes	0.000658218	291.956	183.769	-0.667862	-4.96021
Ctnnd1	catenin (cadherin associated protein), delta 1	296.455	277.589	334.244	210.797	162.312	206.622	yes	0.0117625	302.763	193.244	-0.647766	-4.91752
Fscn1	fascin actin-bundling protein 1	71.2913	57.4564	79.8216	19.4505	24.1408	23.9698	yes	0.000658218	69.5231	22.5204	-1.62626	-4.89922
Tfeb	transcription factor EB	116.973	81.1682	140.578	49.5666	53.3292	48.5945	yes	0.000658218	112.906	50.4968	-1.16086	-4.88227
Itm2b	integral membrane protein 2B	511.493	449.639	521.252	352.922	351.648	365.966	yes	0.0310161	494.128	356.845	-0.469586	-4.70606
Sorbs3	sorbin and SH3 domain containing 3	94.1832	62.4306	90.2906	29.3011	32.9336	35.3737	yes	0.000658218	82.3015	32.5361	-1.33888	-4.64392
Mt4	metallothionein 4	281.524	248.322	254.915	188.571	223.429	86.0013	yes	0.00229676	261.587	166	-0.656104	-4.62258
Bace2	beta-site APP-cleaving enzyme 2	328.451	241.679	405.573	194.983	211.952	249.548	yes	0.0190475	325.234	218.828	-0.571684	-4.56189
Loxl2	lysyl oxidase-like 2	79.0936	63.1922	92.5231	25.3082	26.7363	40.5801	yes	0.000658218	78.2696	30.8749	-1.34202	-4.53659
Lta4h	leukotriene A4 hydrolase	213.194	144.206	243.608	111.871	119.409	128.534	yes	0.000658218	200.336	119.938	-0.740133	-4.49246
Adgrg1	adhesion G protein-coupled receptor G1	128.587	112.843	163.608	72.7347	62.7341	77.974	yes	0.000658218	135.013	71.1476	-0.924208	-4.44796
Phlda1	pleckstrin homology like domain, family A, member 1	432.244	262.273	432.16	242.284	276.276	275.153	yes	0.0137049	375.559	264.571	-0.505385	-4.38674
Sema6d	sema domain, transmembrane domain (TM), and cytoplasmic domain, (semaphorin) 6D	70.7416	49.409	59.564	20.1433	20.7446	20.8241	yes	0.000658218	59.9049	20.5707	-1.54208	-4.38468
Wisp1	WNT1 inducible signaling pathway protein 1	40.7122	28.362	47.3093	8.27263	8.5883	9.84466	yes	0.000658218	38.7945	8.90186	-2.12367	-4.32834
H2-T23	histocompatibility 2, T region locus 23	59.8586	49.7504	59.9542	16.779	19.5857	20.8025	yes	0.000658218	56.5211	19.0557	-1.56856	-4.30958
Tm4sf1	transmembrane 4 superfamily member 1	287.325	233.634	265.908	195.923	157.137	165.08	yes	0.000658218	262.289	172.713	-0.602778	-4.29481
Dynll2	dynein light chain LC8-type 2	136.328	191.885	137.606	94.4224	98.8673	71.8111	yes	0.000658218	155.273	88.3669	-0.813228	-4.28639
Acot1	acyl-CoA thioesterase 1	78.6975	75.872	93.2681	33.386	39.1223	37.5658	yes	0.000658218	82.6125	36.6914	-1.17092	-4.20422
Igsf8	immunoglobulin superfamily, member 8	359.268	358.596	479.349	253.407	278.305	338.803	yes	0.0423285	399.071	290.172	-0.459739	-4.148
Derl1	Der1-like domain family, member 1	101.908	87.1059	112.489	54.8474	59.2779	35.0615	yes	0.000658218	100.501	49.7289	-1.01505	-4.14235
Dkk3	dickkopf WNT signaling pathway inhibitor 3	211.691	168.16	218.538	123.655	122.927	128.145	yes	0.000658218	199.463	124.909	-0.675244	-4.13951
Glrb	glycine receptor, beta subunit	207.926	149.322	223.541	111.502	127.499	123.716	yes	0.000658218	193.596	120.906	-0.67917	-4.0989
Eef1a2	eukaryotic translation elongation factor 1 alpha 2	37.5573	22.7731	69.6545	11.2306	16.7411	10.031	yes	0.000658218	43.3283	12.6676	-1.77417	-4.09736
Epb4.1l4b	erythrocyte membrane protein band 4.1 like 4b	99.8159	89.8751	109.918	48.93	52.5847	48.6694	yes	0.000658218	99.8697	50.0614	-0.996349	-4.06777
Eogt	EGF domain-specific O-linked N-acetylglucosamine (GlcNAc) transferase	101.977	82.9414	104.395	45.7845	51.0208	46.6026	yes	0.000658218	96.4378	47.8026	-1.01251	-4.04955
Lmo4	LIM domain only 4	131.125	104.705	119.167	61.543	67.6208	62.8337	yes	0.000658218	118.332	63.9992	-0.886719	-4.02378
Cers4	ceramide synthase 4	93.8672	111.438	91.5929	44.3014	59.5595	45.9926	yes	0.000658218	98.966	49.9512	-0.986415	-4.01657
Gstm1	glutathione S-transferase, mu 1	151.949	99.8734	133.424	66.3828	78.0653	72.4069	yes	0.000658218	128.415	72.285	-0.829051	-3.96209
Fam53b	family with sequence similarity 53, member B	86.1708	59.2296	99.3701	35.849	37.8034	43.1842	yes	0.000658218	81.5902	38.9455	-1.06694	-3.88424
Gpr155	G protein-coupled receptor 155	55.6229	53.2709	50.5794	19.0533	24.1177	16.8133	yes	0.000658218	53.1577	19.9948	-1.41066	-3.87738
Cpne4	copine IV	98.4592	61.1159	78.9953	33.7149	43.3834	35.645	yes	0.000658218	79.5235	37.5811	-1.08137	-3.87584
Ifit3	interferon-induced protein with tetratricopeptide repeats 3	22.5573	19.0634	45.2391	1.98756	3.23374	12.9625	yes	0.000658218	28.9533	6.06127	-2.25603	-3.86865
Fndc1	fibronectin type III domain containing 1	17.2993	12.5514	25.8318	1.49918	1.30663	1.39891	yes	0.000658218	18.5608	1.40157	-3.72714	-3.84054
Cxcl14	chemokine (C-X-C motif) ligand 14	191.011	147.063	253.008	112.825	112.161	162.393	yes	0.000658218	197.027	129.126	-0.609613	-3.7598
Ptgr1	prostaglandin reductase 1	91.3842	69.2687	92.9183	33.1867	42.3849	51.2671	yes	0.000658218	84.5237	42.2796	-0.999396	-3.75147
Fstl4	follistatin-like 4	67.0267	61.7273	65.8782	25.8623	29.0673	31.1033	yes	0.000658218	64.8774	28.6776	-1.17779	-3.74259
Ttyh2	tweety family member 2	131.634	110.585	185.156	74.7763	87.7747	95.6485	yes	0.000658218	142.458	86.0665	-0.727016	-3.73035
Filip1l	filamin A interacting protein 1-like	70.2846	63.1964	52.5951	26.4658	27.5775	27.5218	yes	0.000658218	62.0254	27.1884	-1.18987	-3.68829
Jun	jun proto-oncogene	283.257	181.956	295.173	165.011	193.777	172.841	yes	0.0169706	253.462	177.21	-0.516312	-3.67435
Scrn1	secernin 1	80.09	70.3898	94.0236	36.3747	48.1109	38.1154	yes	0.000658218	81.5011	40.867	-0.995884	-3.6733
Ak3	adenylate kinase 3	157.809	128.943	161.168	85.5236	94.6547	96.7874	yes	0.00280352	149.307	92.3219	-0.693534	-3.66593
Id2	inhibitor of DNA binding 2	285.183	141.763	267.295	155.467	192.184	135.796	yes	0.00229676	231.414	161.149	-0.522079	-3.54636
Ctsh	cathepsin H	94.464	46.4988	103.607	58.8912	31.4539	36.9143	yes	0.000658218	81.5233	42.4198	-0.942474	-3.5124
4931406C07Rik	RIKEN cDNA 4931406C07 gene	104.787	88.1986	93.2587	48.8737	57.5935	51.8376	yes	0.000658218	95.4148	52.7683	-0.854542	-3.50336
Elovl4	elongation of very long chain fatty acids (FEN1/Elo2, SUR4/Elo3, yeast)-like 4	69.0245	190.013	65.0096	41.1365	71.4431	75.1278	yes	0.000658218	108.016	62.5691	-0.787718	-3.47961
Aplp2	amyloid beta (A4) precursor-like protein 2	187.193	189.092	220.056	136.142	128.065	141.609	yes	0.00563807	198.78	135.272	-0.555312	-3.47475
Col16a1	collagen, type XVI, alpha 1	133.388	136.363	139.764	82.5606	78.6949	94.3013	yes	0.000658218	136.505	85.1856	-0.680272	-3.44674
Pacs2	phosphofurin acidic cluster sorting protein 2	83.1364	65.0568	102.903	41.4394	42.4576	50.898	yes	0.000658218	83.6987	44.9317	-0.897473	-3.41815
Spg21	SPG21, maspardin	146.769	111.08	140.788	81.7715	80.9104	86.34	yes	0.000658218	132.879	83.0073	-0.678803	-3.39423
Tspan10	tetraspanin 10	189.496	136.952	239.804	97.6216	127.219	162.456	yes	0.00122911	188.751	129.099	-0.548005	-3.3459
Appl2	adaptor protein, phosphotyrosine interaction, PH domain and leucine zipper containing 2	93.9088	89.2561	88.0769	54.7198	54.3532	42.9661	yes	0.000658218	90.4139	50.6797	-0.835137	-3.34512
Sdc3	syndecan 3	177.642	153.775	213.325	105.06	121.296	144.135	yes	0.0125484	181.581	123.497	-0.556135	-3.32544
Col12a1	collagen, type XII, alpha 1	51.4705	65.2782	42.0988	23.3152	15.8241	32.5069	yes	0.000658218	52.9492	23.8821	-1.14868	-3.31614
Tef	thyrotroph embryonic factor	71.0946	60.2832	67.1973	25.7924	43.187	31.3757	yes	0.000658218	66.1917	33.4517	-0.984571	-3.27985
Tmem176b	transmembrane protein 176B	107.455	77.5176	101.263	54.2671	60.5956	51.8333	yes	0.000658218	95.4119	55.5653	-0.779984	-3.24291
Rnf144a	ring finger protein 144A	29.1166	32.9282	26.2909	7.29117	11.5251	9.1153	yes	0.000658218	29.4452	9.31052	-1.6611	-3.23428
Krt79	keratin 79	147.322	285.696	91.7554	111.529	134.801	114.189	yes	0.00608033	174.924	120.173	-0.541619	-3.18723
Traf4	TNF receptor associated factor 4	30.6699	27.8642	41.4582	13.4782	11.7769	10.7115	yes	0.000658218	33.3308	11.9889	-1.47516	-3.17022
Plxnc1	plexin C1	114.895	86.3002	130.118	58.8729	64.4732	81.91	yes	0.00122911	110.438	68.4187	-0.690771	-3.14191
Hsd17b11	hydroxysteroid (17-beta) dehydrogenase 11	56.0691	43.75	65.4015	25.6199	23.4777	31.0471	yes	0.000658218	55.0735	26.7149	-1.04371	-3.13573
Eci2	enoyl-Coenzyme A delta isomerase 2	104.487	101.094	104.603	58.4683	64.6829	66.6872	yes	0.000658218	103.395	63.2795	-0.708352	-3.10724
Fa2h	fatty acid 2-hydroxylase	47.3638	135.156	32.2348	26.1427	56.7882	34.1227	yes	0.000658218	71.5849	39.0179	-0.87552	-3.09667
Tinagl1	tubulointerstitial nephritis antigen-like 1	116.68	82.7508	175.315	80.8149	74.6107	86.499	yes	0.000658218	124.915	80.6415	-0.631355	-3.08802
Nadk	NAD kinase	125.465	106.074	153.874	86.775	91.2986	73.9186	yes	0.000658218	128.471	83.9974	-0.613026	-3.05109
Pink1	PTEN induced putative kinase 1	72.4486	50.8703	94.0597	39.9662	40.3361	40.1987	yes	0.000658218	72.4595	40.167	-0.851165	-3.04286
Glul	glutamate-ammonia ligase (glutamine synthetase)	170.488	159.644	186.083	118.655	129.6	113.747	yes	0.00424048	172.072	120.667	-0.511974	-3.00441
Bfsp2	beaded filament structural protein 2, phakinin	15.0812	24.2244	18.8162	5.38203	5.71727	2.85538	yes	0.000658218	19.3739	4.65156	-2.05833	-3.0036
Vcan	versican	40.3202	49.7201	54.6401	27.7277	22.3818	18.6409	yes	0.000658218	48.2268	22.9168	-1.07343	-3.00071
Sdr16c6	short chain dehydrogenase/reductase family 16C, member 6	49.3705	145.291	34.4289	35.6766	52.9805	41.9685	yes	0.000658218	76.3635	43.5419	-0.810479	-2.99737
Sptlc2	serine palmitoyltransferase, long chain base subunit 2	111.555	89.6083	125.284	66.2489	70.297	70.7875	yes	0.000658218	108.816	69.1111	-0.654898	-2.9766
St3gal4	ST3 beta-galactoside alpha-2,3-sialyltransferase 4	35.1371	29.2166	51.9314	16.0107	15.5422	18.9831	yes	0.000658218	38.7617	16.8453	-1.20228	-2.93903
Rarres1	retinoic acid receptor responder (tazarotene induced) 1	19.9284	84.3382	6.08485	12.5277	30.8241	3.75811	yes	0.000658218	36.7838	15.7033	-1.228	-2.90974
Mamdc2	MAM domain containing 2	28.1011	21.3977	34.1745	6.64786	10.8512	12.6379	yes	0.000658218	27.8911	10.0457	-1.47323	-2.89733
Elovl3	elongation of very long chain fatty acids (FEN1/Elo2, SUR4/Elo3, yeast)-like 3	31.821	113.418	26.0931	18.7197	43.0745	28.5245	yes	0.000658218	57.1107	30.1062	-0.923699	-2.89158
Wscd1	WSC domain containing 1	46.162	48.2938	53.9612	21.9547	26.0471	26.5375	yes	0.000658218	49.4723	24.8464	-0.993583	-2.85656
Fam102a	family with sequence similarity 102, member A	33.4167	32.8044	34.492	13.8488	13.0354	14.9564	yes	0.000658218	33.571	13.9469	-1.26728	-2.84684
Serpina3j	serine (or cysteine) peptidase inhibitor, clade A (alpha-1 antiproteinase, antitrypsin), member 3J	43.0541	91.04	43.778	23.3052	45.8775	28.0846	yes	0.000658218	59.2907	32.4224	-0.870813	-2.80559
Gm2115	predicted gene 2115	130.246	105.04	130.586	78.5694	61.593	106.173	yes	0.000658218	121.957	82.1118	-0.570715	-2.78927
St3gal5	ST3 beta-galactoside alpha-2,3-sialyltransferase 5	131.556	85.0843	135.188	68.5985	77.8743	88.3907	yes	0.000658218	117.276	78.2878	-0.583049	-2.78798
Cadm1	cell adhesion molecule 1	74.7948	56.7666	87.5961	38.1305	41.7881	49.3735	yes	0.000658218	73.0525	43.0974	-0.761334	-2.77947
Synpr	synaptoporin	22.1515	1.91662	2.77103	0.622102	0.541157	0.203669	yes	0.000658218	8.94638	0.455643	-4.29533	-2.76908
Smpd1	sphingomyelin phosphodiesterase 1, acid lysosomal	146.547	109.328	174.47	88.8941	92.5333	119.386	yes	0.000658218	143.448	100.271	-0.516625	-2.76573
Mme	membrane metallo endopeptidase	12.706	13.8676	18.7539	2.28827	3.45016	4.06104	yes	0.000658218	15.1092	3.26649	-2.20961	-2.76267
Pisd-ps1	phosphatidylserine decarboxylase, pseudogene 1	46.9373	65.0683	43.2374	26.4449	30.7536	24.4266	yes	0.000658218	51.7477	27.2084	-0.927443	-2.76166
Tmem256	transmembrane protein 256	186.954	133.113	215.689	110.668	136.544	143.331	yes	0.046119	178.585	130.181	-0.456095	-2.75467
Zfp385a	zinc finger protein 385A	55.7384	39.0573	63.847	26.9828	31.3075	26.0306	yes	0.000658218	52.8809	28.107	-0.911819	-2.75287
Fkbp9	FK506 binding protein 9	97.1515	80.974	109.279	61.0546	61.0486	61.9418	yes	0.000658218	95.8015	61.3483	-0.643024	-2.74835
Dcaf6	DDB1 and CUL4 associated factor 6	94.4647	77.3757	94.3126	56.7552	56.4721	53.9158	yes	0.000658218	88.7177	55.7144	-0.671172	-2.74616
Wdr95	WD40 repeat domain 95	15.3563	15.998	13.4115	3.2893	4.86433	2.27317	yes	0.000658218	14.9219	3.4756	-2.1021	-2.66862
Ccser2	coiled-coil serine rich 2	76.3502	79.2996	100.763	48.405	51.3361	62.5561	yes	0.000658218	85.4709	54.0991	-0.65983	-2.65549
Mknk2	MAP kinase-interacting serine/threonine kinase 2	170.465	127.627	194.801	119.947	118.437	120.426	yes	0.0166145	164.298	119.603	-0.458054	-2.65258
Creg1	cellular repressor of E1A-stimulated genes 1	77.6866	54.6133	79.6412	42.8211	46.8481	37.8959	yes	0.000658218	70.647	42.5217	-0.73243	-2.64384
Fads6	fatty acid desaturase domain family, member 6	18.5262	16.9212	10.3209	6.21023	3.79082	1.46032	yes	0.000658218	15.2561	3.82046	-1.99757	-2.61825
Dhrs7	dehydrogenase/reductase (SDR family) member 7	44.3268	67.1052	41.7735	19.3157	34.396	30.6675	yes	0.000658218	51.0685	28.1264	-0.860509	-2.57801
Tmem176a	transmembrane protein 176A	48.3434	33.0217	50.851	23.6507	21.237	24.4065	yes	0.000658218	44.072	23.0981	-0.932091	-2.55913
Cdc42ep4	CDC42 effector protein (Rho GTPase binding) 4	48.7213	35.559	25.4345	24.3514	16.9113	12.058	yes	0.000658218	36.5716	17.7736	-1.04099	-2.54995
Gpsm2	G-protein signalling modulator 2 (AGS3-like, C. elegans)	48.3512	41.9164	43.6314	24.0961	24.8418	21.9138	yes	0.000658218	44.633	23.6172	-0.918271	-2.54386
Papss1	3'-phosphoadenosine 5'-phosphosulfate synthase 1	90.8158	73.9444	97.248	55.9818	58.9475	55.4634	yes	0.000658218	87.3361	56.7976	-0.620748	-2.54369
Sord	sorbitol dehydrogenase	40.3458	32.5726	50.801	18.0655	20.7988	24.6912	yes	0.000658218	41.2398	21.1852	-0.960983	-2.53826
Slc15a4	solute carrier family 15, member 4	60.0807	40.6267	77.054	36.0576	32.5558	35.5382	yes	0.000658218	59.2538	34.7172	-0.771257	-2.53115
Vegfb	vascular endothelial growth factor B	107.408	84.0849	138.18	65.0313	77.7379	84.3072	yes	0.000658218	109.891	75.6921	-0.537858	-2.5104
Pax3	paired box 3	120.342	94.7155	137.013	81.9743	87.2487	76.8864	yes	0.00326971	117.357	82.0365	-0.516565	-2.50132
Sox4	SRY (sex determining region Y)-box 4	33.5386	30.3062	44.7059	19.1857	15.484	19.0148	yes	0.000658218	36.1836	17.8948	-1.01579	-2.48698
Proser2	proline and serine rich 2	25.0727	15.0867	20.0913	6.05428	8.76462	6.80318	yes	0.000658218	20.0836	7.20736	-1.47847	-2.46478
Rap2b	RAP2B, member of RAS oncogene family	65.6526	55.8234	79.7115	38.0979	39.8666	46.4112	yes	0.000658218	67.0625	41.4586	-0.693836	-2.45782
Nrbp2	nuclear receptor binding protein 2	80.9899	77.0016	71.5865	53.6339	59.5211	34.1328	yes	0.000658218	76.526	49.0959	-0.640346	-2.44734
4933430M04Rik	RIKEN cDNA 4933430M04 gene	16.6546	8.97897	6.61653	1.94814	3.50448	0.588895	yes	0.000658218	10.75	2.01384	-2.41632	-2.44529
Nrcam	neuronal cell adhesion molecule	53.5801	59.9533	58.7715	34.3116	34.8442	33.2385	yes	0.000658218	57.435	34.1314	-0.750828	-2.43531
Fntb	farnesyltransferase, CAAX box, beta	52.1402	35.2902	57.4415	24.5187	26.3846	30.6367	yes	0.000658218	48.2906	27.18	-0.829198	-2.43003
Jam2	junction adhesion molecule 2	18.6258	10.6488	18.839	5.69747	5.72721	3.33513	yes	0.000658218	16.0379	4.91994	-1.70477	-2.42857
Cd82	CD82 antigen	35.5326	35.8882	47.0953	23.3569	21.7529	17.8426	yes	0.000658218	39.5054	20.9841	-0.91275	-2.38139
Rnd3	Rho family GTPase 3	44.4196	44.7725	37.8999	21.5176	20.0231	28.2809	yes	0.000658218	42.364	23.2739	-0.864128	-2.35631
Spred1	sprouty protein with EVH-1 domain 1, related sequence	45.7907	49.2102	51.4469	27.1055	28.2119	29.1689	yes	0.000658218	48.8159	28.1621	-0.793597	-2.35406
Edil3	EGF-like repeats and discoidin I-like domains 3	14.8395	13.6044	12.5209	4.76776	3.71382	3.00504	yes	0.000658218	13.6549	3.82887	-1.83443	-2.34997
Hs3st1	heparan sulfate (glucosamine) 3-O-sulfotransferase 1	27.8832	31.9068	28.7533	10.3032	16.6637	15.3744	yes	0.000658218	29.5144	14.1138	-1.06432	-2.33161
Mvb12b	multivesicular body subunit 12B	59.7636	49.4205	63.0849	34.0558	36.1753	35.5905	yes	0.000658218	57.423	35.2739	-0.703029	-2.30051
Smpdl3a	sphingomyelin phosphodiesterase, acid-like 3A	124.208	84.7731	142.042	85.9232	88.2189	79.6736	yes	0.006476	117.008	84.6052	-0.467785	-2.28202
St3gal1	ST3 beta-galactoside alpha-2,3-sialyltransferase 1	62.5971	44.2421	61.2626	33.8363	37.1696	32.1179	yes	0.000658218	56.0339	34.3746	-0.704958	-2.27793
Cox6b2	cytochrome c oxidase subunit 6B2	26.101	15.6048	25.1642	7.13141	9.82842	11.5824	yes	0.0129405	22.29	9.51408	-1.22826	-2.26543
Far2	fatty acyl CoA reductase 2	19.6401	55.3225	12.0487	11.2834	20.0201	11.1316	yes	0.0323909	29.0038	14.145	-1.03594	-2.26203
1810043G02Rik	RIKEN cDNA 1810043G02 gene	37.8195	30.691	35.7985	17.8422	18.963	18.2495	yes	0.000658218	34.7697	18.3516	-0.921926	-2.25262
Gsta4	glutathione S-transferase, alpha 4	32.8588	53.6505	25.8366	15.2156	13.9151	31.9355	yes	0.000658218	37.4486	20.3554	-0.879501	-2.24825
Fst	follistatin	28.9518	21.6898	26.7504	10.5202	14.4223	11.1112	yes	0.000658218	25.7973	12.0179	-1.10204	-2.24077
Tjp2	tight junction protein 2	62.3963	55.2673	54.6123	41.8824	33.4542	32.2243	yes	0.000658218	57.4253	35.8536	-0.679567	-2.23353
Ubl7	ubiquitin-like 7 (bone marrow stromal cell-derived)	76.6419	58.1061	83.3202	47.0541	51.2993	46.0885	yes	0.000658218	72.6894	48.1473	-0.59429	-2.23261
Ifi27	interferon, alpha-inducible protein 27	27.691	35.4265	30.1182	11.4624	13.8533	22.2365	yes	0.000658218	31.0786	15.8507	-0.97137	-2.22288
Cd164	CD164 antigen	100.877	95.3255	103.385	68.8252	73.584	70.2118	yes	0.00375207	99.8625	70.8737	-0.494693	-2.21854
Gsta2	glutathione S-transferase, alpha 2 (Yc2)	8.35599	9.57851	12.7608	2.20122	2.99336	1.95204	yes	0.000658218	10.2318	2.38221	-2.10268	-2.21014
Mboat2	membrane bound O-acyltransferase domain containing 2	28.0564	26.2408	27.5432	12.1532	17.9625	9.53893	yes	0.000658218	27.2801	13.2182	-1.04532	-2.20966
Pdzrn3	PDZ domain containing RING finger 3	64.7012	60.8276	52.94	35.9611	37.7374	39.5262	yes	0.000658218	59.4896	37.7416	-0.656483	-2.20555
Rnf167	ring finger protein 167	41.2003	36.7388	41.5446	23.9391	22.4944	20.8636	yes	0.000658218	39.8279	22.4324	-0.828198	-2.20461
C4b	complement component 4B (Chido blood group)	5.64791	10.3264	6.05029	1.60629	0.947423	0.399446	yes	0.000658218	7.34153	0.984386	-2.89878	-2.20316
Kctd12	potassium channel tetramerisation domain containing 12	87.4806	72.4957	90.6854	52.7828	56.2754	63.148	yes	0.00280352	83.5539	57.4021	-0.541604	-2.20273
Abcd3	ATP-binding cassette, sub-family D (ALD), member 3	84.9543	82.7983	96.8049	58.3434	61.2343	64.2787	yes	0.00177006	88.1858	61.2855	-0.525002	-2.20029
Alcam	activated leukocyte cell adhesion molecule	31.7762	34.6146	34.5635	16.8452	18.8679	18.3239	yes	0.000658218	33.6514	18.0123	-0.901683	-2.1758
Cyth3	cytohesin 3	77.9538	59.8751	93.0997	49.6415	53.5689	53.7449	yes	0.000658218	76.9762	52.3184	-0.557093	-2.16852
Amdhd1	amidohydrolase domain containing 1	9.52397	6.25914	10.1625	0.716259	2.10165	2.26377	yes	0.000658218	8.64854	1.69389	-2.35211	-2.16254
Hps4	HPS4, biogenesis of lysosomal organelles complex 3 subunit 2	38.9585	25.943	53.6932	24.7217	21.5322	21.3523	yes	0.000658218	39.5316	22.5354	-0.810812	-2.15735
Kazn	kazrin, periplakin interacting protein	64.0833	54.3452	66.2135	38.6115	43.0259	38.3716	yes	0.000658218	61.5473	40.003	-0.621588	-2.13792
Serpinb1a	serine (or cysteine) peptidase inhibitor, clade B, member 1a	124.997	112.263	126.541	94.191	88.2542	88.1361	yes	0.0137049	121.267	90.1938	-0.427087	-2.13684
Ifit3b	interferon-induced protein with tetratricopeptide repeats 3B	8.26426	5.09031	13.8092	0.633494	1.64242	3.78612	yes	0.000658218	9.05459	2.02068	-2.16381	-2.11359
Prickle1	prickle planar cell polarity protein 1	28.4449	29.1244	35.1075	13.5731	14.0428	21.5643	yes	0.000658218	30.8923	16.3934	-0.914131	-2.10848
Fam210b	family with sequence similarity 210, member B	64.8395	58.4716	74.0367	41.9826	51.1509	38.0328	yes	0.000658218	65.7826	43.7221	-0.589343	-2.10814
Schip1	schwannomin interacting protein 1	48.0311	35.7638	43.2452	22.3948	28.7284	24.1438	yes	0.000658218	42.3467	25.089	-0.755195	-2.10154
Dnajc6	DnaJ heat shock protein family (Hsp40) member C6	13.9425	11.1135	12.4922	3.35961	5.03024	3.55312	yes	0.000658218	12.5161	3.98099	-1.65258	-2.10138
Ube2l6	ubiquitin-conjugating enzyme E2L 6	29.908	27.7201	56.3075	16.9045	22.2567	26.0993	yes	0.000658218	37.9785	21.7535	-0.803937	-2.09934
Tmem189	transmembrane protein 189	147.073	115.626	164.167	102.623	107.213	117.507	yes	0.0378073	142.289	109.114	-0.38298	-2.09227
Gnb5	guanine nucleotide binding protein (G protein), beta 5	40.4276	28.7665	44.8237	19.7294	23.3897	22.408	yes	0.000658218	38.0059	21.8424	-0.799095	-2.08935
Mylip	myosin regulatory light chain interacting protein	64.352	47.9196	35.1435	28.4653	28.3237	34.7234	yes	0.000658218	49.1384	30.5041	-0.687845	-2.08804
Eddm3b	epididymal protein 3B	5.33991	4.89825	9.89443	1.36625	1.37848	0.0768592	yes	0.000658218	6.71086	0.94053	-2.83495	-2.08608
Gsta1	glutathione S-transferase, alpha 1 (Ya)	10.0897	8.45142	12.6472	2.87416	2.30624	3.26411	yes	0.00122911	10.3961	2.81484	-1.88492	-2.08581
Tenm4	teneurin transmembrane protein 4	28.6857	27.9264	28.7873	14.0583	14.4371	15.9422	yes	0.000658218	28.4665	14.8125	-0.942445	-2.07548
Alb	albumin	0.01	14.5192	0.01	0.553805	0.01	0.01	yes	0.010183	4.8464	0.191268	-4.66324	-2.07404
Psen2	presenilin 2	102.875	79.9637	139.263	71.0954	75.7201	90.6992	yes	0.0121266	107.367	79.1716	-0.439499	-2.06442
Nrp1	neuropilin 1	22.1623	16.8737	32.2291	9.43027	11.7665	13.3478	yes	0.000658218	23.755	11.5149	-1.04474	-2.06104
Sbk1	SH3-binding kinase 1	32.8206	25.0105	36.9978	17.8098	17.5262	16.4004	yes	0.000658218	31.6096	17.2455	-0.874147	-2.05506
Gm10863	predicted gene 10863	23.6818	25.6262	27.4817	11.7876	11.6589	15.1601	yes	0.0073311	25.5966	12.8689	-0.992065	-2.05218
Pten	phosphatase and tensin homolog	32.898	35.2499	39.8872	19.0133	20.7832	22.1144	yes	0.000658218	36.0117	20.637	-0.803235	-2.04274
Gpr37	G protein-coupled receptor 37	75.7302	51.6442	82.0354	47.8532	52.7105	42.9647	yes	0.000658218	69.8033	47.8428	-0.544993	-2.02466
Atp13a2	ATPase type 13A2	104.558	94.4729	147.78	89.189	91.7602	79.4601	yes	0.0461191	115.604	86.8031	-0.413368	-2.02436
Pald1	phosphatase domain containing, paladin 1	16.529	13.4779	21.4078	7.62685	7.99792	5.87532	yes	0.000658218	17.1382	7.1667	-1.25784	-2.02262
Fosb	FBJ osteosarcoma oncogene B	86.046	82.0711	97.3628	47.5764	66.3951	76.9118	yes	0.00771655	88.4933	63.6278	-0.475912	-2.01606
Spsb1	splA/ryanodine receptor domain and SOCS box containing 1	19.8057	14.1699	20.8769	9.27239	8.77589	5.84358	yes	0.000658218	18.2842	7.96395	-1.19904	-2.01437
Slc26a2	solute carrier family 26 (sulfate transporter), member 2	32.1668	33.1995	36.1535	19.744	20.6093	17.426	yes	0.000658218	33.8399	19.2598	-0.813137	-2.00086
Mgat5	mannoside acetylglucosaminyltransferase 5	96.8131	110.158	141.788	89.7579	87.79	85.5669	yes	0.0274749	116.253	87.7049	-0.406538	-1.99897
Mfsd12	major facilitator superfamily domain containing 12	36.7283	26.7032	67.8782	28.0819	25.8914	27.1584	yes	0.000658218	43.7699	27.0439	-0.694636	-1.98762
Hddc2	HD domain containing 2	52.8759	42.0101	46.9752	28.6616	35.9685	25.004	yes	0.010183	47.2871	29.878	-0.66236	-1.98182
Psapl1	prosaposin-like 1	38.3404	83.0178	33.9932	24.4664	41.3795	35.1248	yes	0.000658218	51.7838	33.6569	-0.621599	-1.96106
Pik3r3	phosphoinositide-3-kinase regulatory subunit 3	46.7964	38.1032	74.4054	42.0191	31.7017	30.5083	yes	0.000658218	53.1017	34.743	-0.612033	-1.95877
Car11	carbonic anhydrase 11	18.7742	10.7191	19.7657	4.87057	8.68727	7.34026	yes	0.000658218	16.4197	6.96603	-1.23702	-1.9549
Gt(ROSA)26Sor	gene trap ROSA 26, Philippe Soriano	13.8342	12.6418	18.9933	5.85813	5.70695	6.85517	yes	0.015118	15.1564	6.14008	-1.3036	-1.95378
Adamtsl4	ADAMTS-like 4	59.9237	60.7864	73.2338	45.9733	41.3713	45.4345	yes	0.00122911	64.648	44.2597	-0.546611	-1.95367
Nipal3	NIPA-like domain containing 3	100.217	58.9983	119.192	58.488	64.3501	81.2713	yes	0.0241471	92.8024	68.0365	-0.447854	-1.95281
Dennd1a	DENN/MADD domain containing 1A	10.8252	11.0119	10.4496	3.36795	3.94882	2.97854	yes	0.000658218	10.7622	3.43177	-1.64895	-1.94571
Eya1	EYA transcriptional coactivator and phosphatase 1	23.4565	15.9844	24.7959	12.9255	10.3738	8.10956	yes	0.000658218	21.4123	10.4696	-1.03223	-1.93798
Gas2l3	growth arrest-specific 2 like 3	48.2796	32.4743	38.4277	20.1439	23.6715	28.9919	yes	0.000658218	39.7272	24.2691	-0.711007	-1.93232
Deptor	DEP domain containing MTOR-interacting protein	45.2719	44.9969	44.869	23.554	26.8498	35.0286	yes	0.000658218	45.0459	28.4775	-0.661576	-1.93228
Hk2	hexokinase 2	28.2759	29.0304	34.2162	16.192	18.552	16.8245	yes	0.000658218	30.5075	17.1895	-0.827636	-1.92838
Elovl6	ELOVL family member 6, elongation of long chain fatty acids (yeast)	52.0877	66.8296	42.5638	36.7828	43.4427	26.7968	yes	0.000658218	53.827	35.6741	-0.593454	-1.91881
Ap3m2	adaptor-related protein complex 3, mu 2 subunit	26.5909	19.5616	34.1414	13.953	14.7833	14.7088	yes	0.000658218	26.7646	14.4817	-0.886097	-1.91254
Rnase1	ribonuclease, RNase A family, 1 (pancreatic)	20.8206	15.2508	27.2743	9.81081	11.9095	9.44148	yes	0.00177006	21.1152	10.3873	-1.02347	-1.91137
Fam49b	family with sequence similarity 49, member B	30.4238	26.8366	29.8792	18.6846	20.6007	9.50831	yes	0.000658218	29.0465	16.2645	-0.836636	-1.89888
Edem3	ER degradation enhancer, mannosidase alpha-like 3	47.3977	42.0844	47.9244	29.7616	30.7914	27.8302	yes	0.000658218	45.8022	29.4611	-0.636606	-1.88361
Mbd2	methyl-CpG binding domain protein 2	103.063	96.5616	119.898	73.8542	78.1339	90.223	yes	0.0241471	106.508	80.737	-0.399653	-1.88329
Enpp6	ectonucleotide pyrophosphatase/phosphodiesterase 6	11.9043	6.65068	14.717	2.96807	3.64451	5.15268	yes	0.000658218	11.0907	3.92175	-1.49977	-1.85024
Rhbdf1	rhomboid 5 homolog 1	83.5071	73.7994	83.2084	61.5173	65.1234	48.8604	yes	0.006476	80.1716	58.5004	-0.454646	-1.84031
Ssbp4	single stranded DNA binding protein 4	91.3135	76.0282	109.241	70.154	72.1953	64.435	yes	0.0180095	92.1942	68.9281	-0.419584	-1.83293
Tbc1d2b	TBC1 domain family, member 2B	37.5475	27.6283	44.0334	21.9757	21.0249	24.0703	yes	0.000658218	36.4031	22.357	-0.703336	-1.83238
Bace1	beta-site APP cleaving enzyme 1	50.4427	38.9594	64.6322	36.2675	34.2393	32.682	yes	0.000658218	51.3448	34.3963	-0.577965	-1.83036
Cyth1	cytohesin 1	28.1246	25.665	28.8678	15.4509	17.033	14.2145	yes	0.000658218	27.5525	15.5661	-0.823771	-1.82538
Prodh	proline dehydrogenase	41.2831	46.0264	50.1765	30.4813	35.9481	23.4103	yes	0.000658218	45.8287	29.9466	-0.61386	-1.8245
Ano1	anoctamin 1, calcium activated chloride channel	21.6611	20.7464	19.3136	10.506	12.0996	8.66559	yes	0.000658218	20.5737	10.4237	-0.98093	-1.82306
6330403A02Rik	mechanosensory transduction mediator	5.0791	2.82142	6.26896	0.556153	0.673866	0.401589	yes	0.000658218	4.72316	0.543869	-3.11842	-1.82104
Sntb1	syntrophin, basic 1	9.5419	8.89981	10.2698	2.54563	4.06192	2.69721	yes	0.000658218	9.5705	3.10159	-1.62559	-1.81722
St6gal1	beta galactoside alpha 2,6 sialyltransferase 1	72.5336	64.3287	87.9372	53.1929	50.3208	59.8032	yes	0.00853522	74.9332	54.439	-0.460965	-1.80182
Hdac11	histone deacetylase 11	10.764	8.93938	12.6027	4.21464	4.53042	2.95704	yes	0.000658218	10.7687	3.9007	-1.46504	-1.79318
Gm3776	predicted gene 3776	6.84794	6.58796	8.88146	0.971186	1.722	3.20104	yes	0.00470227	7.43912	1.96474	-1.92079	-1.78518
Rarb	retinoic acid receptor, beta	35.6308	33.7013	42.4884	19.4766	25.7842	24.976	yes	0.000658218	37.2735	23.4123	-0.670886	-1.77934
Ube2e3	ubiquitin-conjugating enzyme E2E 3	68.6077	64.0567	67.1012	46.4686	47.1888	49.1893	yes	0.00518114	66.5885	47.6156	-0.48384	-1.77539
Ldhb	lactate dehydrogenase B	74.8292	60.5336	74.1557	57.0222	55.1252	39.0979	yes	0.0117625	69.8395	50.4151	-0.470187	-1.77132
Mdfi	MyoD family inhibitor	18.5692	17.8691	16.6731	11.8324	7.70954	6.30927	yes	0.000658218	17.7038	8.61707	-1.03879	-1.77116
Acaa2	acetyl-Coenzyme A acyltransferase 2 (mitochondrial 3-oxoacyl-Coenzyme A thiolase)	93.2771	89.391	84.0611	64.5305	67.4365	68.4763	yes	0.0197309	88.9097	66.8144	-0.412182	-1.77061
Gbp2	guanylate binding protein 2	11.9989	9.67857	20.1391	2.73668	4.3274	11.0773	yes	0.000658218	13.9389	6.04713	-1.20479	-1.76526
Isg15	ISG15 ubiquitin-like modifier	18.9315	21.3871	55.6653	4.98827	10.5196	42.7008	yes	0.0245117	31.9946	19.4029	-0.721558	-1.75636
Prex1	phosphatidylinositol-3,4,5-trisphosphate-dependent Rac exchange factor 1	21.4836	18.7868	23.8668	9.63474	8.79776	15.5776	yes	0.000658218	21.3791	11.3367	-0.915198	-1.75573
D7Ertd443e	DNA segment, Chr 7, ERATO Doi 443, expressed	11.6806	11.656	16.6399	7.23358	6.26023	3.55244	yes	0.000658218	13.3255	5.68208	-1.2297	-1.75317
Ermp1	endoplasmic reticulum metallopeptidase 1	24.7035	26.8914	28.3844	15.342	14.4792	16.1898	yes	0.000658218	26.6598	15.337	-0.797648	-1.74721
Plcg1	phospholipase C, gamma 1	25.862	24.4262	28.328	16.2985	15.7996	12.9617	yes	0.000658218	26.2054	15.0199	-0.802986	-1.7421
Adcy2	adenylate cyclase 2	17.8947	12.5821	16.4354	7.62122	7.65053	6.62407	yes	0.000658218	15.6374	7.29861	-1.09931	-1.74118
Rabgef1	RAB guanine nucleotide exchange factor (GEF) 1	51.0658	38.9615	56.1529	32.3456	33.7756	32.8907	yes	0.000658218	48.7267	33.004	-0.562074	-1.73915
Cited2	Cbp/p300-interacting transactivator, with Glu/Asp-rich carboxy-terminal domain, 2	26.9742	25.9043	26.8399	14.1084	15.5955	16.3336	yes	0.000658218	26.5728	15.3458	-0.792103	-1.73404
Sp5	trans-acting transcription factor 5	7.985	4.6212	7.84595	1.91597	1.86757	1.47259	yes	0.000658218	6.81738	1.75204	-1.96018	-1.73035
Arhgap31	Rho GTPase activating protein 31	22.3722	16.7383	25.0456	12.8583	10.6835	10.892	yes	0.000658218	21.3854	11.4779	-0.897761	-1.72825
Kifc3	kinesin family member C3	42.1989	29.5112	43.444	23.3926	25.4792	25.1935	yes	0.00122911	38.3847	24.6884	-0.636696	-1.72457
Atrn	attractin	28.3518	29.3932	30.7418	18.978	16.5595	17.4276	yes	0.000658218	29.4956	17.655	-0.74042	-1.72436
Plekhg5	pleckstrin homology domain containing, family G (with RhoGef domain) member 5	24.7779	19.7865	23.0512	12.7903	13.0614	11.2207	yes	0.000658218	22.5385	12.3575	-0.867011	-1.72348
Wdr6	WD repeat domain 6	36.5699	35.9551	47.9133	26.9181	27.3474	24.0881	yes	0.000658218	40.1461	26.1179	-0.620223	-1.72331
Fam117a	family with sequence similarity 117, member A	8.87815	6.16118	8.34161	2.55644	3.14199	1.28177	yes	0.000658218	7.79365	2.32673	-1.74399	-1.71848
Npc1	NPC intracellular cholesterol transporter 1	74.0775	75.4458	73.298	57.4384	50.2845	56.6871	yes	0.0284584	74.2738	54.8033	-0.438589	-1.71376
Mylk3	myosin light chain kinase 3	8.42199	6.14946	6.71936	3.02441	2.13394	0.692843	yes	0.000658218	7.09694	1.9504	-1.86343	-1.71102
Cttnbp2	cortactin binding protein 2	32.1376	26.6632	31.6987	19.8161	18.1919	16.7745	yes	0.000658218	30.1665	18.2608	-0.724195	-1.71084
Sox6	SRY (sex determining region Y)-box 6	18.2126	18.5658	17.5473	10.636	8.69501	8.18971	yes	0.000658218	18.1086	9.17357	-0.981117	-1.71063
Chpt1	choline phosphotransferase 1	39.8448	31.6722	45.4578	24.3286	27.5477	24.0202	yes	0.00177006	38.9916	25.2988	-0.624093	-1.70773
Ifi35	interferon-induced protein 35	28.5643	25.5618	37.4843	11.982	18.2285	25.6061	yes	0.000658218	30.5368	18.6055	-0.714817	-1.702
Wwc1	WW, C2 and coiled-coil domain containing 1	31.8255	25.9259	33.1061	18.8504	21.0038	15.3953	yes	0.000658218	30.2858	18.4165	-0.717644	-1.70079
Trib1	tribbles pseudokinase 1	39.682	33.7237	40.9765	26.9885	29.5334	17.455	yes	0.000658218	38.1274	24.659	-0.628716	-1.69975
Inf2	inverted formin, FH2 and WH2 domain containing	61.7507	58.7342	78.4946	46.9968	50.3484	47.2075	yes	0.00563807	66.3265	48.1842	-0.461024	-1.69539
Irf4	interferon regulatory factor 4	34.3511	24.904	37.6832	22.0926	20.9457	17.1387	yes	0.000658218	32.3128	20.059	-0.687855	-1.69325
Cdc14a	CDC14 cell division cycle 14A	21.9324	16.725	27.2051	12.5786	11.9364	11.9009	yes	0.000658218	21.9542	12.1386	-0.854889	-1.68106
Rras2	related RAS viral (r-ras) oncogene 2	23.461	22.8956	23.7232	11.1414	15.0766	13.4619	yes	0.000658218	23.3599	13.2266	-0.82059	-1.67529
Serpina3b	serine (or cysteine) peptidase inhibitor, clade A, member 3B	28.8205	34.0149	32.3104	14.495	36.6092	8.10955	yes	0.00177006	31.7153	19.7379	-0.684208	-1.66976
4930402H24Rik	RIKEN cDNA 4930402H24 gene	19.4096	19.0913	21.4737	11.7903	9.8125	10.6635	yes	0.000658218	19.9915	10.7554	-0.894323	-1.66566
Evl	Ena-vasodilator stimulated phosphoprotein	33.4684	34.4658	51.1183	24.096	23.9668	30.6184	yes	0.0113598	39.6842	26.2271	-0.597507	-1.65757
Mxra7	matrix-remodelling associated 7	21.3395	18.2809	17.095	12.6716	8.99538	8.32292	yes	0.000658218	18.9051	9.99663	-0.919264	-1.65708
Pdpn	podoplanin	3.93962	6.05162	7.11583	0.89682	1.57808	1.55846	yes	0.000658218	5.70236	1.34445	-2.08454	-1.64165
Synpo	synaptopodin	11.8737	8.89203	12.8377	4.10695	4.12759	5.78601	yes	0.000658218	11.2011	4.67352	-1.26107	-1.63834
Npy1r	neuropeptide Y receptor Y1	3.56332	1.77304	5.69603	0.633131	0.377074	0.14214	yes	0.000658218	3.67746	0.384115	-3.2591	-1.63414
Gjb2	gap junction protein, beta 2	70.0949	85.7978	75.2047	37.9116	35.1081	101.171	yes	0.0395651	77.0325	58.0636	-0.407833	-1.632
Srgap3	SLIT-ROBO Rho GTPase activating protein 3	4.30227	3.56631	6.94259	1.00917	1.00959	0.936791	yes	0.000658218	4.93706	0.985184	-2.32519	-1.6239
Pygl	liver glycogen phosphorylase	12.0955	15.3338	15.5352	7.73032	7.46202	5.35857	yes	0.000658218	14.3215	6.8503	-1.06394	-1.62372
Nipa1	non imprinted in Prader-Willi/Angelman syndrome 1 homolog (human)	29.8339	24.0111	36.1476	16.8702	16.4684	22.7382	yes	0.00122911	29.9975	18.6923	-0.682402	-1.62017
Mybpc1	myosin binding protein C, slow-type	5.21806	0.983183	4.637	0.255192	0.529713	0.385868	yes	0.000658218	3.61275	0.390258	-3.2106	-1.61064
Ctnnbl1	catenin, beta like 1	58.196	51.2825	56.4025	38.6348	40.8819	39.7588	yes	0.006476	55.2937	39.7585	-0.475851	-1.59344
Btg1	B cell translocation gene 1, anti-proliferative	54.1536	40.8431	63.4173	38.5784	36.4718	37.9003	yes	0.00563807	52.8047	37.6502	-0.488009	-1.5934
Sypl	synaptophysin-like protein	77.8757	61.3961	82.5765	57.8611	55.2318	54.5907	yes	0.0281261	73.9494	55.8945	-0.403832	-1.58447
Crnde	colorectal neoplasia differentially expressed (non-protein coding)	24.2516	26.4206	24.2283	13.9152	17.0361	14.0666	yes	0.00691313	24.9668	15.006	-0.734477	-1.57549
Plxnd1	plexin D1	49.8238	35.7568	64.9263	34.9806	34.1376	37.6942	yes	0.00280352	50.169	35.6041	-0.49475	-1.57264
Eefsec	eukaryotic elongation factor, selenocysteine-tRNA-specific	27.0351	20.0631	30.1761	15.0484	16.8416	15.0333	yes	0.000658218	25.7581	15.6411	-0.719684	-1.57237
Slc7a2	solute carrier family 7 (cationic amino acid transporter, y+ system), member 2	6.56516	6.41077	7.362	2.18977	2.08127	2.02622	yes	0.000658218	6.77931	2.09909	-1.69138	-1.57072
Hey2	hairy/enhancer-of-split related with YRPW motif 2	4.87177	4.73042	4.85989	1.00902	1.57621	0.513323	yes	0.000658218	4.82069	1.03285	-2.22261	-1.56561
Fgfrl1	fibroblast growth factor receptor-like 1	14.8124	11.6089	16.8829	9.25325	7.53899	4.7115	yes	0.000658218	14.4347	7.16791	-1.00992	-1.56347
6330416G13Rik	transmembrane protein 268	38.8123	28.8193	40.9458	23.608	24.8332	23.8443	yes	0.000658218	36.1925	24.0952	-0.586946	-1.55802
Stau2	staufen double-stranded RNA binding protein 2	26.6869	19.4164	23.9296	14.302	15.9218	11.3276	yes	0.000658218	23.3443	13.8505	-0.753136	-1.55668
Plekhm2	pleckstrin homology domain containing, family M (with RUN domain) member 2	58.2339	49.1846	72.4309	45.3207	41.611	45.422	yes	0.0133484	59.9498	44.1179	-0.442391	-1.55194
Smad5	SMAD family member 5	52.8623	45.0744	60.0767	38.3752	39.2979	36.0498	yes	0.0073311	52.6711	37.9076	-0.474524	-1.55123
Hlf	hepatic leukemia factor	33.613	26.4885	26.3741	13.4908	20.92	20.1751	yes	0.000658218	28.8252	18.1953	-0.663765	-1.55019
Dusp4	dual specificity phosphatase 4	83.0585	62.1099	91.3381	59.5159	50.4611	71.8152	yes	0.0448614	78.8355	60.5974	-0.37959	-1.54453
Gbp3	guanylate binding protein 3	8.57504	8.61866	15.1154	1.29252	3.26557	9.60193	yes	0.000658218	10.7697	4.72001	-1.19012	-1.53713
Dock7	dedicator of cytokinesis 7	53.2263	47.8632	49.5205	36.2905	36.6415	34.882	yes	0.00470227	50.2033	35.938	-0.482273	-1.53701
Gm13177	arylacetamide deacetylase like 4	6.08264	22.4359	6.83591	4.28647	6.57604	5.38106	yes	0.00177006	11.7848	5.41452	-1.12202	-1.53604
Colq	collagen-like tail subunit (single strand of homotrimer) of asymmetric acetylcholinesterase	5.18354	6.31354	8.40429	2.33798	2.11675	1.84736	yes	0.000658218	6.63379	2.1007	-1.65897	-1.53383
Rdx	radixin	58.5108	49.7914	54.8898	41.8291	41.173	35.8537	yes	0.00936199	54.3973	39.6186	-0.457358	-1.52418
Trpv4	transient receptor potential cation channel, subfamily V, member 4	6.51595	5.37298	7.76594	2.43145	2.02749	1.76678	yes	0.000658218	6.55162	2.07524	-1.65857	-1.52406
Pkp4	plakophilin 4	33.9779	29.4584	41.5626	26.7151	23.4164	19.942	yes	0.000658218	34.9996	23.3578	-0.583433	-1.52395
Sema3b	sema domain, immunoglobulin domain (Ig), short basic domain, secreted, (semaphorin) 3B	58.1045	42.6757	59.5695	33.8809	33.7656	49.0974	yes	0.0081231	53.4499	38.9146	-0.457874	-1.51241
Nek6	NIMA (never in mitosis gene a)-related expressed kinase 6	18.2461	17.3759	19.2658	10.4509	9.48166	10.752	yes	0.000658218	18.2959	10.2282	-0.838973	-1.51059
Slc25a35	solute carrier family 25, member 35	18.0513	13.3823	19.3148	8.09261	9.86322	9.71414	yes	0.00122911	16.9161	9.22332	-0.875041	-1.50465
Paqr6	progestin and adipoQ receptor family member VI	22.6051	19.5903	26.8658	14.679	12.2888	14.7711	yes	0.000658218	23.0204	13.913	-0.726483	-1.4986
Habp2	hyaluronic acid binding protein 2	13.7019	18.5817	32.2836	6.56256	12.9512	18.7775	yes	0.00122911	21.5224	12.7638	-0.753786	-1.49581
Zhx2	zinc fingers and homeoboxes 2	22.2485	15.5074	19.6963	11.46	11.5982	9.78691	yes	0.000658218	19.1507	10.9484	-0.806684	-1.49507
Tead2	TEA domain family member 2	10.5149	7.43941	10.6421	4.29485	5.09124	2.79244	yes	0.000658218	9.53214	4.05951	-1.23149	-1.48443
Spg20	spastic paraplegia 20, spartin (Troyer syndrome) homolog (human)	23.7813	23.39	26.9009	14.0948	15.3964	16.4566	yes	0.000658218	24.6907	15.3159	-0.688936	-1.48216
Isoc2a	isochorismatase domain containing 2a	58.5206	42.4136	69.2924	41.0677	41.261	43.8535	yes	0.0463881	56.7422	42.0607	-0.431948	-1.47701
Gm11837	predicted gene 11837	21.2738	14.969	20.5023	9.29872	9.26504	14.006	yes	0.0231963	18.915	10.8566	-0.800963	-1.4769
Rnpep	arginyl aminopeptidase (aminopeptidase B)	28.6874	23.8796	35.1833	16.7603	19.3736	20.8801	yes	0.00122911	29.2501	19.0047	-0.622088	-1.47489
Bcl11a	B cell CLL/lymphoma 11A (zinc finger protein)	13.6119	9.85011	14.6998	5.91833	7.07548	5.90212	yes	0.000658218	12.7206	6.29864	-1.01405	-1.47255
Paxip1	PAX interacting (with transcription-activation domain) protein 1	20.0196	16.823	20.5563	11.6516	11.2932	10.3238	yes	0.000658218	19.133	11.0895	-0.786862	-1.46311
Plekhj1	pleckstrin homology domain containing, family J member 1	40.2612	35.582	49.6748	27.5606	28.9015	32.0173	yes	0.018354	41.8393	29.4931	-0.504481	-1.46181
Amotl2	angiomotin-like 2	15.8754	15.4159	16.1814	7.96098	8.11235	9.79599	yes	0.000658218	15.8242	8.62311	-0.875856	-1.45641
Atxn7l3b	ataxin 7-like 3B	48.1541	46.026	58.2552	36.6137	36.0476	38.8042	yes	0.010183	50.8118	37.1552	-0.4516	-1.45607
Il1rap	interleukin 1 receptor accessory protein	35.8903	37.0127	30.8685	22.4195	22.1081	25.9759	yes	0.000658218	34.5905	23.5012	-0.557643	-1.45495
Nol4l	nucleolar protein 4-like	7.24004	5.11229	8.4055	3.2798	2.49163	1.62303	yes	0.000658218	6.91928	2.46482	-1.48914	-1.45411
Fam110b	family with sequence similarity 110, member B	14.1848	8.12186	14.8897	5.90169	6.0044	6.58103	yes	0.000658218	12.3988	6.16237	-1.00864	-1.44755
Tcp11l2	t-complex 11 (mouse) like 2	38.6661	27.2155	42.1713	24.4724	25.2703	24.6677	yes	0.00424048	36.0176	24.8035	-0.538162	-1.43794
Cd36	CD36 molecule	5.23061	15.5086	3.53556	2.78464	4.0501	2.97849	yes	0.000658218	8.09159	3.27108	-1.30666	-1.43006
Hfe	hemochromatosis	12.5253	11.5496	12.8025	6.22237	6.258	5.97915	yes	0.00122911	12.2925	6.15317	-0.998372	-1.42946
Hal	histidine ammonia lyase	14.1749	8.32569	17.1375	4.545	7.31623	8.61027	yes	0.000658218	13.2127	6.82383	-0.953271	-1.42729
Tmem108	transmembrane protein 108	8.98756	11.2347	7.75756	3.37443	4.4179	4.52422	yes	0.000658218	9.32661	4.10552	-1.18379	-1.42459
Aff3	AF4/FMR2 family, member 3	20.7058	17.8763	19.7667	12.02	12.0268	10.5336	yes	0.000658218	19.4496	11.5268	-0.754748	-1.42352
Kif26b	kinesin family member 26B	29.2656	24.4635	28.9513	15.8324	18.0795	19.9939	yes	0.000658218	27.5601	17.9686	-0.617105	-1.42149
Cyp39a1	cytochrome P450, family 39, subfamily a, polypeptide 1	30.2424	24.5789	32.2071	20.3352	19.1597	18.0412	yes	0.000658218	29.0095	19.1787	-0.597019	-1.41618
Gm10639	predicted gene 10639	4.05804	2.49888	4.0489	0.582711	0.753374	0.592786	yes	0.0121266	3.53527	0.642957	-2.45903	-1.41498
Scd3	stearoyl-coenzyme A desaturase 3	3.34884	18.3006	2.5147	2.26792	6.85376	0.780846	yes	0.000658218	8.05471	3.30084	-1.287	-1.41073
Ttc7	tetratricopeptide repeat domain 7	44.1961	33.3857	50.3809	29.6697	33.841	28.2636	yes	0.00936199	42.6542	30.5914	-0.479561	-1.40947
Adamts20	a disintegrin-like and metallopeptidase (reprolysin type) with thrombospondin type 1 motif, 20	19.0142	21.3972	15.349	9.82339	13.0972	9.96005	yes	0.000658218	18.5868	10.9602	-0.762003	-1.40305
Map3k11	mitogen-activated protein kinase kinase kinase 11	47.2413	41.9393	67.6004	40.3966	35.4003	40.8362	yes	0.0169706	52.2603	38.8777	-0.426773	-1.40182
Man2a2	mannosidase 2, alpha 2	45.2748	40.5984	48.0893	31.3183	29.7083	36.0597	yes	0.0073311	44.6542	32.3621	-0.46449	-1.40066
Ss18	SS18, nBAF chromatin remodeling complex subunit	58.0875	48.9489	53.4292	42.2376	41.6358	36.0709	yes	0.0200754	53.4885	39.9814	-0.419899	-1.3971
Gucy1b3	guanylate cyclase 1, soluble, beta 1	5.47133	13.2336	3.28025	3.97042	1.75651	2.87691	yes	0.000658218	7.32839	2.86795	-1.35348	-1.39687
Ptov1	prostate tumor over expressed gene 1	60.3419	53.8814	72.0629	48.2805	48.8322	45.4831	yes	0.0346489	62.0954	47.5319	-0.385589	-1.39093
Sdk1	sidekick cell adhesion molecule 1	3.32957	3.12539	4.31121	0.842158	0.9453	0.335873	yes	0.000658218	3.58872	0.707777	-2.3421	-1.38988
Olfml1	olfactomedin-like 1	2.89806	4.64612	3.07173	0.902071	0.721642	0.451204	yes	0.0469495	3.53864	0.691639	-2.3551	-1.38421
Maml2	mastermind like transcriptional coactivator 2	11.8477	10.0966	9.27941	5.20028	4.3779	5.39023	yes	0.000658218	10.4079	4.98947	-1.06072	-1.38086
Ikbkb	inhibitor of kappaB kinase beta	67.3872	57.9355	66.4651	48.6298	53.1924	45.9659	yes	0.0425866	63.9293	49.2627	-0.375981	-1.37854
Tapt1	transmembrane anterior posterior transformation 1	35.8383	38.4256	33.1009	23.1445	27.7912	24.1876	yes	0.00177006	35.7883	25.0411	-0.515189	-1.37796
Mx1	MX dynamin-like GTPase 1	4.30058	2.49209	4.80169	0.646706	0.559793	1.39591	yes	0.000658218	3.86479	0.86747	-2.1555	-1.37784
Amt	aminomethyltransferase	6.18416	4.25398	6.54466	1.65995	1.52497	2.48421	yes	0.00280352	5.66093	1.88971	-1.58288	-1.37243
Lgmn	legumain	57.1336	47.3629	55.7451	45.3385	35.0643	40.2443	yes	0.0235507	53.4139	40.2157	-0.409455	-1.36398
Sec14l2	SEC14-like lipid binding 2	18.1437	18.4201	19.1661	10.5995	10.3239	12.5809	yes	0.000658218	18.5766	11.1681	-0.734105	-1.3584
Clp1	CLP1, cleavage and polyadenylation factor I subunit	14.6287	14.3562	15.3472	8.86169	8.66865	7.2477	yes	0.000658218	14.7774	8.25935	-0.83929	-1.35802
Zfp703	zinc finger protein 703	37.5626	41.6066	42.7429	23.8927	31.8226	32.1784	yes	0.00812309	40.6374	29.2979	-0.47201	-1.35595
Pde1b	phosphodiesterase 1B, Ca2+-calmodulin dependent	13.5194	9.26708	17.2443	7.7116	6.17078	7.71875	yes	0.000658218	13.3436	7.20038	-0.890003	-1.35536
Gng7	guanine nucleotide binding protein (G protein), gamma 7	21.6879	18.5784	25.1545	12.8531	14.536	13.7946	yes	0.000658218	21.8069	13.7279	-0.667676	-1.35529
Snhg18	small nucleolar RNA host gene 18	8.71725	5.84469	10.4551	3.70304	2.88947	4.35598	yes	0.00177006	8.33901	3.6495	-1.19218	-1.3544
Tbx4	T-box 4	10.8688	4.11179	8.18431	3.42584	2.76056	3.58384	yes	0.000658218	7.72163	3.25675	-1.24547	-1.34754
Abcc5	ATP-binding cassette, sub-family C (CFTR/MRP), member 5	31.0234	29.2658	36.1147	21.6999	22.8394	22.1426	yes	0.0284584	32.1346	22.2273	-0.531796	-1.34372
Paqr7	progestin and adipoQ receptor family member VII	22.3726	18.1815	27.3926	14.1295	13.8468	15.4618	yes	0.000658218	22.6489	14.4794	-0.645442	-1.34074
Akt2	thymoma viral proto-oncogene 2	42.3952	36.6247	48.4565	30.039	30.3026	32.7478	yes	0.006476	42.4921	31.0298	-0.453541	-1.33679
Acvr1c	activin A receptor, type IC	12.4112	16.8829	12.6937	5.97672	8.35741	8.95574	yes	0.000658218	13.9959	7.76329	-0.850268	-1.33614
Aar2	AAR2 splicing factor homolog	30.9008	22.8019	34.8951	20.8154	19.3513	20.2064	yes	0.00122911	29.5326	20.1244	-0.553365	-1.33511
Rab11fip2	RAB11 family interacting protein 2 (class I)	21.051	21.177	22.6117	13.327	13.5808	14.1469	yes	0.000658218	21.6132	13.6849	-0.65933	-1.33446
Pla2g15	phospholipase A2, group XV	49.8279	24.8722	78.5502	32.8373	32.0202	50.5687	yes	0.0300646	51.0834	38.4754	-0.408919	-1.33227
Auts2	autism susceptibility candidate 2	11.9803	10.1667	10.774	5.48666	6.43852	4.75219	yes	0.000658218	10.9737	5.55912	-0.981116	-1.33165
Cgrrf1	cell growth regulator with ring finger domain 1	49.5167	33.3057	35.716	30.3598	29.2564	25.9824	yes	0.0350005	39.5128	28.5329	-0.469695	-1.33107
Ccdc13	coiled-coil domain containing 13	2.60406	3.24837	3.18264	0.677312	0.405396	0.457885	yes	0.000658218	3.01169	0.513531	-2.55205	-1.33054
Agpat3	1-acylglycerol-3-phosphate O-acyltransferase 3	62.5401	53.0947	67.9923	42.5864	47.5685	51.9061	yes	0.0494514	61.209	47.3537	-0.370268	-1.32977
1700019G17Rik	N-acetyltransferase 8 (GCN5-related) family member 4	8.67367	6.40631	7.143	3.01801	4.0454	2.25495	yes	0.000658218	7.40766	3.10612	-1.2539	-1.32661
Mpst	mercaptopyruvate sulfurtransferase	39.4224	32.2735	50.004	27.3805	29.4819	31.5791	yes	0.0389988	40.5666	29.4805	-0.460533	-1.3246
Ncam1	neural cell adhesion molecule 1	7.85253	6.24408	9.80272	3.57231	2.70751	4.18457	yes	0.000658218	7.96644	3.48813	-1.19148	-1.3232
Smad6	SMAD family member 6	5.04969	3.36742	6.6722	1.48905	2.4449	0.921522	yes	0.000658218	5.02977	1.61849	-1.63584	-1.32301
Gas6	growth arrest specific 6	48.6915	35.5856	54.5651	34.246	37.0027	32.1149	yes	0.0200754	46.2807	34.4545	-0.425718	-1.31617
Nck1	non-catalytic region of tyrosine kinase adaptor protein 1	32.2518	25.6505	30.7301	20.5633	23.9421	16.2882	yes	0.0105984	29.5441	20.2645	-0.543915	-1.31485
Scamp2	secretory carrier membrane protein 2	59.1059	52.4515	65.126	44.7588	44.6248	47.0579	yes	0.0455783	58.8945	45.4805	-0.372884	-1.31298
Igfbp2	insulin-like growth factor binding protein 2	18.5192	38.7666	9.60298	15.8266	13.0022	14.2411	yes	0.0162666	22.2963	14.3566	-0.635084	-1.31143
Myo1b	myosin IB	40.7474	43.0927	37.0168	26.9886	25.7141	35.5111	yes	0.00691313	40.2856	29.4046	-0.454224	-1.30342
Rab15	RAB15, member RAS oncogene family	14.9192	12.2013	22.0448	10.0829	10.6796	8.42687	yes	0.000658218	16.3884	9.72979	-0.752197	-1.30291
Selenbp1	selenium binding protein 1	6.45795	5.99555	10.6627	3.31945	3.6392	3.22539	yes	0.00122911	7.7054	3.39468	-1.18259	-1.29386
Hsd3b6	hydroxy-delta-5-steroid dehydrogenase, 3 beta- and steroid delta-isomerase 6	6.96806	15.5238	3.05597	3.27245	6.7831	1.79379	yes	0.00280352	8.51594	3.94978	-1.10839	-1.29328
Nmnat2	nicotinamide nucleotide adenylyltransferase 2	4.81503	3.54995	4.76004	0.980414	1.77382	1.14427	yes	0.000658218	4.37501	1.2995	-1.75133	-1.29108
Dnajc24	DnaJ heat shock protein family (Hsp40) member C24	23.7288	17.9462	30.9652	16.6008	16.6827	14.7892	yes	0.0264624	24.2134	16.0242	-0.59555	-1.29099
Prkd3	protein kinase D3	49.1403	38.6498	48.242	31.702	34.5379	35.3678	yes	0.0166145	45.344	33.8692	-0.420937	-1.28928
Fam84b	family with sequence similarity 84, member B	9.34763	8.64815	7.7285	4.52399	4.79594	2.72235	yes	0.000658218	8.57476	4.01409	-1.09502	-1.28539
Gstk1	glutathione S-transferase kappa 1	15.1996	12.0792	21.3757	8.9386	9.80976	10.288	yes	0.045332	16.2182	9.67879	-0.744713	-1.28503
Gjc3	gap junction protein, gamma 3	15.7538	20.4948	20.9781	13.3639	10.544	11.8665	yes	0.000658218	19.0756	11.9248	-0.677761	-1.28431
Tmem98	transmembrane protein 98	12.6511	8.2229	12.7978	4.68952	4.9671	8.09823	yes	0.0105984	11.2239	5.91828	-0.923328	-1.28146
Plxna4	plexin A4	3.91495	2.68452	2.98862	0.488246	0.379114	1.16552	yes	0.000658218	3.19603	0.677627	-2.23772	-1.27957
Arnt2	aryl hydrocarbon receptor nuclear translocator 2	27.865	22.3959	30.7968	15.3882	20.4654	19.4117	yes	0.000658218	27.0192	18.4218	-0.552575	-1.2754
Tshz1	teashirt zinc finger family member 1	19.6254	15.9556	17.8295	10.9257	10.7381	11.2835	yes	0.000658218	17.8035	10.9824	-0.696963	-1.27134
Fgf12	fibroblast growth factor 12	5.29083	3.12309	5.8958	1.01194	2.02896	1.69493	yes	0.000658218	4.76991	1.57861	-1.59531	-1.26658
Thsd7a	thrombospondin, type I, domain containing 7A	4.78167	4.59642	5.5106	1.34802	1.62307	2.14202	yes	0.000658218	4.9629	1.70437	-1.54194	-1.26197
Atp8a1	ATPase, aminophospholipid transporter (APLT), class I, type 8A, member 1	6.61669	8.14876	7.21819	3.34214	3.23622	3.15664	yes	0.000658218	7.32788	3.245	-1.17518	-1.25565
Aard	alanine and arginine rich domain containing protein	2.66002	2.08489	3.40073	0.504591	0.497923	0.417323	yes	0.00229676	2.71521	0.473279	-2.5203	-1.25554
Eef2k	eukaryotic elongation factor-2 kinase	26.516	23.6539	27.0813	16.3544	17.8238	18.3879	yes	0.000658218	25.7504	17.522	-0.555425	-1.25086
Pkn1	protein kinase N1	24.8719	21.263	29.1438	16.0633	16.0617	18.888	yes	0.00177006	25.0929	17.0043	-0.561377	-1.24665
Gne	glucosamine (UDP-N-acetyl)-2-epimerase/N-acetylmannosamine kinase	37.2076	27.3032	41.4783	26.7551	25.9874	24.0787	yes	0.0113598	35.3297	25.6071	-0.464339	-1.2455
Tmem37	transmembrane protein 37	4.93592	3.29143	5.946	0.954557	1.41149	2.44438	yes	0.0133484	4.72445	1.60348	-1.55894	-1.24068
Pde7a	phosphodiesterase 7A	13.6465	13.7524	13.5708	8.72466	8.87494	6.09759	yes	0.000658218	13.6566	7.89906	-0.789841	-1.24009
Pxylp1	2-phosphoxylose phosphatase 1	13.8532	11.3372	16.5379	8.24661	8.26982	7.79331	yes	0.000658218	13.9094	8.10325	-0.779492	-1.23753
Smad9	SMAD family member 9	4.69858	3.08459	5.11501	1.08576	1.80464	1.18594	yes	0.000658218	4.29939	1.35878	-1.66182	-1.23623
Gimap9	GTPase, IMAP family member 9	17.729	14.6898	18.6069	13.266	9.47666	8.90919	yes	0.0169706	17.0086	10.5506	-0.688934	-1.23016
Macrod1	MACRO domain containing 1	21.1626	16.3619	24.2476	12.2938	17.0402	10.9195	yes	0.0241471	20.5907	13.4178	-0.617841	-1.22998
Kcna2	potassium voltage-gated channel, shaker-related subfamily, member 2	2.14543	4.21766	1.51204	1.09069	0.110873	0.19624	yes	0.000658218	2.62504	0.465934	-2.49414	-1.22808
Lhpp	phospholysine phosphohistidine inorganic pyrophosphate phosphatase	26.7148	39.7077	23.0022	17.4896	25.2924	20.3694	yes	0.0217648	29.8082	21.0505	-0.501859	-1.22803
Zhx1	zinc fingers and homeoboxes 1	14.9477	12.1445	13.922	9.92015	8.98138	4.98134	yes	0.000658218	13.6714	7.96096	-0.780147	-1.22777
Nuak1	NUAK family, SNF1-like kinase, 1	8.24234	7.00336	8.37746	3.13599	3.4878	4.47104	yes	0.000658218	7.87439	3.69828	-1.09031	-1.2276
Nlk	nemo like kinase	26.617	21.288	31.2591	19.0107	17.5883	17.9778	yes	0.00229676	26.388	18.1923	-0.536559	-1.22749
Plagl1	pleiomorphic adenoma gene-like 1	2.27135	7.99072	0.176857	1.43611	0.555572	0.740564	yes	0.000658218	3.47964	0.910749	-1.93381	-1.22601
Daam2	dishevelled associated activator of morphogenesis 2	27.6055	21.4491	23.3152	14.0684	21.0326	13.9085	yes	0.000658218	24.1233	16.3365	-0.562326	-1.22418
Gm20605	predicted gene 20605	23.972	29.6854	29.6696	20.3929	20.3851	17.3605	yes	0.0472422	27.7757	19.3795	-0.51929	-1.22269
Car13	carbonic anhydrase 13	39.8941	40.4258	40.6189	26.2112	30.9507	33.1176	yes	0.0254706	40.3129	30.0932	-0.421807	-1.21797
Tgfbr1	transforming growth factor, beta receptor I	23.4304	21.9485	23.7979	15.6497	15.4396	15.53	yes	0.000658218	23.0589	15.5398	-0.569361	-1.21027
Pogk	pogo transposable element with KRAB domain	19.8539	17.1744	18.8754	12.8262	12.7882	10.2545	yes	0.000658218	18.6346	11.9563	-0.64021	-1.20745
Camk2n1	calcium/calmodulin-dependent protein kinase II inhibitor 1	7.69926	6.63624	9.9009	4.06581	2.84877	4.79263	yes	0.000658218	8.0788	3.9024	-1.04978	-1.20657
Ceacam1	carcinoembryonic antigen-related cell adhesion molecule 1	5.36496	3.91913	6.4653	2.17452	2.59284	1.2463	yes	0.0281261	5.2498	2.00455	-1.38898	-1.20489
Stard7	START domain containing 7	40.7028	41.2885	40.3523	30.1151	32.2725	29.4245	yes	0.0214453	40.7812	30.604	-0.414182	-1.20454
Tlcd2	TLC domain containing 2	9.54293	19.5707	9.10429	5.41639	9.0365	7.60418	yes	0.0158824	12.7393	7.35236	-0.793008	-1.20181
Cidea	cell death-inducing DNA fragmentation factor, alpha subunit-like effector A	13.7552	30.1249	8.63335	8.38392	13.6938	11.1843	yes	0.039271	17.5045	11.0873	-0.658811	-1.20011
Sec14l5	SEC14-like lipid binding 5	5.47687	4.54159	2.87989	1.54912	1.92033	0.896305	yes	0.000658218	4.29945	1.45525	-1.56288	-1.18563
Fgd6	FYVE, RhoGEF and PH domain containing 6	27.9888	23.8399	26.0865	16.6715	17.3828	20.2896	yes	0.000658218	25.9717	18.1146	-0.519787	-1.18334
Fam181b	family with sequence similarity 181, member B	9.709	7.78209	10.9459	3.81177	4.14828	6.99598	yes	0.0081231	9.479	4.98534	-0.927041	-1.18154
Ptprg	protein tyrosine phosphatase, receptor type, G	15.6044	14.6776	18.43	8.84461	10.6119	11.0743	yes	0.000658218	16.2373	10.1769	-0.674011	-1.17918
Efna5	ephrin A5	10.2695	10.7298	9.44499	5.74845	5.00647	5.70395	yes	0.000658218	10.1481	5.48629	-0.887306	-1.179
Sh3bp4	SH3-domain binding protein 4	28.1615	24.5866	29.5776	18.1874	19.2902	20.6542	yes	0.00424048	27.4419	19.3773	-0.502015	-1.17862
Zfp362	zinc finger protein 362	27.8923	21.5672	28.2694	16.6444	17.6084	20.0242	yes	0.00853522	25.9096	18.0923	-0.51811	-1.17848
Cbx6	chromobox 6	6.49068	6.75377	12.1243	3.58868	3.68255	5.63896	yes	0.000658218	8.45625	4.3034	-0.974542	-1.16259
Brca1	breast cancer 1, early onset	7.05019	6.27693	11.6113	3.59314	3.88791	5.12223	yes	0.000658218	8.31281	4.20109	-0.984571	-1.16232
Taok3	TAO kinase 3	35.7281	30.7818	38.1344	24.0435	25.8195	27.681	yes	0.015118	34.8814	25.848	-0.432407	-1.15919
Slc30a7	solute carrier family 30 (zinc transporter), member 7	22.5879	20.7814	25.4899	14.3492	16.997	15.8824	yes	0.00122911	22.9531	15.7429	-0.543989	-1.15908
Eps15	epidermal growth factor receptor pathway substrate 15	39.4308	33.3164	41.3752	28.1855	27.5754	30.0458	yes	0.0194098	38.0408	28.6022	-0.41142	-1.15619
Tpd52l1	tumor protein D52-like 1	23.9221	15.9046	20.1898	13.8991	14.7562	11.3757	yes	0.0439838	20.0055	13.3437	-0.584242	-1.15359
Fuca2	fucosidase, alpha-L- 2, plasma	29.9491	26.5072	32.088	21.1173	21.7946	20.9781	yes	0.00608033	29.5148	21.2967	-0.470809	-1.1529
Atp8b3	ATPase, class I, type 8B, member 3	1.65227	1.12836	3.65407	0.300495	0.484559	0.208418	yes	0.000658218	2.1449	0.331157	-2.69532	-1.15264
Per3	period circadian clock 3	13.692	10.9965	10.2092	5.13168	9.03992	5.96418	yes	0.000658218	11.6326	6.71193	-0.793371	-1.14886
Ctnnbip1	catenin beta interacting protein 1	19.4252	17.246	21.1867	13.7973	13.5914	10.9571	yes	0.00375207	19.286	12.7819	-0.593445	-1.14854
Xylt1	xylosyltransferase 1	9.71035	11.0833	11.8279	6.50058	5.38342	6.53389	yes	0.000658218	10.8738	6.1393	-0.824718	-1.14785
Trim62	tripartite motif-containing 62	13.0979	10.3788	14.7822	7.46889	8.09221	7.18638	yes	0.00177006	12.753	7.58249	-0.750089	-1.14658
Pex5	peroxisomal biogenesis factor 5	28.6052	28.8878	34.4214	21.9608	22.608	22.3244	yes	0.0129405	30.6381	22.2977	-0.458431	-1.14634
Neo1	neogenin	18.6469	16.3955	21.4738	13.8055	12.0513	11.4303	yes	0.000658218	18.8387	12.429	-0.599988	-1.14628
Spats2l	spermatogenesis associated, serine-rich 2-like	16.9281	12.8582	14.2103	8.32338	9.21045	9.72306	yes	0.000658218	14.6655	9.08563	-0.690771	-1.14494
Ptgfrn	prostaglandin F2 receptor negative regulator	20.7076	25.7766	23.6565	17.2683	14.6285	16.6673	yes	0.00229676	23.3802	16.188	-0.530362	-1.14337
Gjb3	gap junction protein, beta 3	16.1641	29.3088	12.8292	11.2402	14.9876	12.6089	yes	0.0169706	19.434	12.9456	-0.586127	-1.14027
Ralgps2	Ral GEF with PH domain and SH3 binding motif 2	18.7114	14.169	17.0968	11.3604	11.3827	9.37198	yes	0.000658218	16.6591	10.705	-0.638019	-1.13821
Myh14	myosin, heavy polypeptide 14	4.61702	4.77637	5.55643	1.7991	2.1991	1.95938	yes	0.000658218	4.98327	1.98586	-1.32733	-1.13542
Adamts7	a disintegrin-like and metallopeptidase (reprolysin type) with thrombospondin type 1 motif, 7	6.51696	5.98265	9.65386	4.66663	3.1825	3.03872	yes	0.000658218	7.38449	3.62928	-1.02481	-1.13153
Bpifb5	BPI fold containing family B, member 5	1.60998	1.40036	3.03239	0.267462	0.396086	0.222215	yes	0.00563807	2.01424	0.295254	-2.77021	-1.13113
Zfp740	zinc finger protein 740	27.3791	28.6763	26.4303	19.9155	20.5554	18.7038	yes	0.00608033	27.4952	19.7249	-0.479164	-1.13077
Rnf38	ring finger protein 38	27.3377	25.0843	30.7233	20.5783	20.4817	18.7229	yes	0.00563807	27.7151	19.9276	-0.475902	-1.12823
Atp2a1	ATPase, Ca++ transporting, cardiac muscle, fast twitch 1	4.09063	1.99344	3.8896	0.899984	1.00067	1.05898	yes	0.0173238	3.32456	0.986545	-1.75271	-1.12604
Samd5	sterile alpha motif domain containing 5	14.215	11.9479	14.2302	8.50871	7.57819	8.62385	yes	0.00122911	13.4644	8.23692	-0.70897	-1.12214
Bloc1s5	biogenesis of lysosomal organelles complex-1, subunit 5, muted	29.2537	23.0553	32.5585	19.8103	23.0932	18.4681	yes	0.0336727	28.2892	20.4572	-0.467641	-1.12176
Sesn3	sestrin 3	25.0442	17.8734	25.6321	16.0155	16.8568	14.7967	yes	0.0147786	22.8499	15.8897	-0.524099	-1.11827
Paqr4	progestin and adipoQ receptor family member IV	13.3849	11.7177	13.383	6.42377	8.36574	8.54437	yes	0.00771655	12.8285	7.77796	-0.721893	-1.1126
Cdk19	cyclin-dependent kinase 19	17.3187	14.5053	21.879	11.7862	11.3472	12.3964	yes	0.000658218	17.901	11.8433	-0.595973	-1.11073
Adk	adenosine kinase	41.2983	34.234	33.8341	28.4135	31.7849	22.5198	yes	0.0482463	36.4555	27.5727	-0.402893	-1.1101
Slc27a6	solute carrier family 27 (fatty acid transporter), member 6	3.54102	4.53618	4.72686	1.3521	1.97443	1.43101	yes	0.000658218	4.26802	1.58585	-1.42831	-1.10858
Stac	src homology three (SH3) and cysteine rich domain	3.66866	0.436228	3.12225	1.01652	0.0916102	0.448149	yes	0.00177006	2.40905	0.51876	-2.21532	-1.10473
Arhgap18	Rho GTPase activating protein 18	13.3796	13.7394	13.7916	9.53414	8.88938	6.91401	yes	0.000658218	13.6369	8.44584	-0.691199	-1.10466
Nrm	nurim (nuclear envelope membrane protein)	23.3754	19.8739	21.0807	13.5153	17.0383	13.833	yes	0.0372052	21.4433	14.7955	-0.535367	-1.10431
Cldn10	claudin 10	5.68253	4.62717	4.25605	1.83535	2.713	1.37785	yes	0.0281261	4.85525	1.9754	-1.2974	-1.10189
Clint1	clathrin interactor 1	37.0025	35.3292	33.5918	27.8329	28.2794	23.8282	yes	0.0254706	35.3078	26.6468	-0.406024	-1.10035
Asphd2	aspartate beta-hydroxylase domain containing 2	2.93011	1.39455	6.92233	1.43268	0.821232	1.61163	yes	0.00470227	3.749	1.28851	-1.5408	-1.09626
Irgm1	immunity-related GTPase family M member 1	10.3577	10.1471	17.3312	5.56292	5.90272	11.5759	yes	0.0081231	12.612	7.68051	-0.715522	-1.09474
Ifit1	interferon-induced protein with tetratricopeptide repeats 1	3.18281	2.32671	8.89671	1.22539	0.927386	3.73155	yes	0.00122911	4.80208	1.96144	-1.29174	-1.09227
Ppp1r14c	protein phosphatase 1, regulatory inhibitor subunit 14C	25.508	29.2819	14.8216	15.8448	18.8587	14.3539	yes	0.0166145	23.2038	16.3525	-0.504855	-1.08935
Cyp2f2	cytochrome P450, family 2, subfamily f, polypeptide 2	5.21973	7.509	5.11042	1.57828	4.9094	1.77385	yes	0.00771655	5.94638	2.75384	-1.11057	-1.08236
Rabep2	rabaptin, RAB GTPase binding effector protein 2	22.2417	19.1975	25.6388	14.9536	16.8931	15.2171	yes	0.0190475	22.3593	15.6879	-0.511222	-1.08157
Pcdh7	protocadherin 7	19.627	20.3782	20.3963	15.5713	12.9843	12.9551	yes	0.00280352	20.1338	13.8369	-0.541101	-1.08038
Glt1d1	glycosyltransferase 1 domain containing 1	10.6763	11.1562	13.9964	6.79487	9.17061	5.69827	yes	0.0268012	11.943	7.22125	-0.725841	-1.07859
Hacd2	3-hydroxyacyl-CoA dehydratase 2	20.5424	30.4651	17.7057	14.319	18.8617	15.3581	yes	0.0073311	22.9044	16.1796	-0.501449	-1.07567
Tlr12	toll-like receptor 12	2.43679	1.88319	2.07292	0.34129	0.474305	0.429297	yes	0.000658218	2.13097	0.414964	-2.36045	-1.07546
Fam83f	family with sequence similarity 83, member F	8.61111	9.60546	8.09098	4.22709	5.28047	4.91415	yes	0.000658218	8.76918	4.80724	-0.867235	-1.07527
Mturn	maturin, neural progenitor differentiation regulator homolog (Xenopus)	8.71921	4.85109	14.1442	4.94997	5.24394	5.29593	yes	0.000658218	9.23817	5.16328	-0.839319	-1.07377
Adgb	androglobin	4.69417	10.9961	2.76472	4.60996	2.15737	2.0033	yes	0.000658218	6.15166	2.92354	-1.07326	-1.07157
Prkci	protein kinase C, iota	26.732	27.1225	28.3601	19.9953	20.3068	19.7921	yes	0.00853522	27.4049	20.0314	-0.452169	-1.07057
Chd9	chromodomain helicase DNA binding protein 9	23.5226	18.2641	18.9773	15.0958	14.0504	12.8641	yes	0.000658218	20.2547	14.0034	-0.532474	-1.06803
Abhd17c	abhydrolase domain containing 17C	19.2773	21.6326	23.2761	13.9094	13.582	17.3876	yes	0.018354	21.3953	14.9597	-0.516218	-1.06736
Gas1	growth arrest specific 1	19.8199	26.6965	17.8315	14.4815	14.199	16.3349	yes	0.0073311	21.4493	15.0051	-0.515474	-1.06731
Vstm2b	V-set and transmembrane domain containing 2B	3.15129	2.95603	2.4061	0.358273	0.96612	1.08151	yes	0.006476	2.83781	0.801968	-1.82316	-1.0671
Podxl2	podocalyxin-like 2	8.85637	9.13345	10.8395	5.9914	5.27845	5.14376	yes	0.0110021	9.60977	5.4712	-0.812644	-1.0657
Dcbld1	discoidin, CUB and LCCL domain containing 1	7.63796	8.78146	9.54911	4.65054	4.67065	5.02794	yes	0.000658218	8.65618	4.78304	-0.855801	-1.05651
Irf9	interferon regulatory factor 9	15.9535	16.6055	23.6541	10.6685	11.2409	16.5091	yes	0.0125484	18.7377	12.8062	-0.549105	-1.05611
Pisd-ps2	phosphatidylserine decarboxylase, pseudogene 2	11.2091	12.634	8.71065	5.79554	8.26631	5.34329	yes	0.0300646	10.8513	6.46838	-0.746385	-1.05315
Vash1	vasohibin 1	3.78177	3.93174	5.2479	1.59219	1.4426	2.18464	yes	0.000658218	4.32047	1.73981	-1.31226	-1.0483
Phc3	polyhomeotic 3	21.8559	23.7828	23.4495	17.2673	16.2713	15.8659	yes	0.00563807	23.0294	16.4682	-0.483797	-1.044
Tmtc4	transmembrane and tetratricopeptide repeat containing 4	11.9368	6.92737	11.4587	5.94236	6.36402	5.47798	yes	0.000658218	10.1076	5.92812	-0.769797	-1.04371
Pde4b	phosphodiesterase 4B, cAMP specific	6.39687	8.15746	6.01711	4.05482	3.54326	2.91616	yes	0.000658218	6.85715	3.50475	-0.968298	-1.04144
Extl2	exostoses (multiple)-like 2	23.8521	20.2858	24.206	16.5736	16.1795	16.0744	yes	0.0140569	22.7813	16.2758	-0.485119	-1.04095
Arhgap32	Rho GTPase activating protein 32	9.61195	10.9903	9.05875	5.45931	5.65818	6.20658	yes	0.000658218	9.887	5.77469	-0.775789	-1.03912
Ispd	isoprenoid synthase domain containing	18.82	16.2759	19.0238	11.6497	12.4367	12.927	yes	0.0073311	18.0399	12.3378	-0.548106	-1.03456
Igsf3	immunoglobulin superfamily, member 3	18.5423	21.409	24.1838	14.8689	12.6906	17.891	yes	0.00375207	21.3784	15.1502	-0.496818	-1.0305
Mdm1	transformed mouse 3T3 cell double minute 1	10.0729	6.00655	8.48532	3.80166	4.64297	5.10967	yes	0.00177006	8.18826	4.5181	-0.85784	-1.02961
Arid1a	AT rich interactive domain 1A (SWI-like)	35.2571	30.6098	41.7122	29.6374	26.9776	26.3683	yes	0.0499961	35.8597	27.6611	-0.374505	-1.02868
Aldh3b1	aldehyde dehydrogenase 3 family, member B1	10.0513	8.64124	11.1282	5.20857	5.48186	6.89644	yes	0.0154745	9.94025	5.86229	-0.761817	-1.02584
Nrg2	neuregulin 2	7.95046	5.94122	13.4451	4.58835	3.94631	7.16076	yes	0.00177006	9.11226	5.23181	-0.8005	-1.02458
Ccny	cyclin Y	36.1144	35.1493	36.5274	26.5384	28.4784	28.3869	yes	0.0423285	35.9304	27.8012	-0.370055	-1.01828
Rpa2	replication protein A2	25.3761	25.022	21.66	16.0068	18.6797	17.7107	yes	0.0485349	24.0194	17.4657	-0.459671	-1.0175
Enc1	ectodermal-neural cortex 1	34.5383	27.3544	35.5325	22.6761	24.2903	27.3968	yes	0.0274749	32.4751	24.7877	-0.389706	-1.01587
Cep131	centrosomal protein 131	6.33317	6.9812	9.63261	4.63353	4.02573	3.8266	yes	0.00122911	7.64899	4.16195	-0.878009	-1.01465
Phactr1	phosphatase and actin regulator 1	12.5446	9.05963	14.4642	7.21909	6.68409	8.71431	yes	0.00122911	12.0228	7.53916	-0.673298	-1.01374
Prtg	protogenin	5.63938	2.89727	6.07878	2.43747	2.26102	1.8537	yes	0.000658218	4.87181	2.18406	-1.15744	-1.01184
Aldh1l1	aldehyde dehydrogenase 1 family, member L1	7.69534	5.01599	8.42537	3.45439	3.32676	4.39933	yes	0.00122911	7.04557	3.72683	-0.918768	-1.01115
Lrrc4b	leucine rich repeat containing 4B	1.5623	1.38841	1.9138	0.227022	0.25236	0.253439	yes	0.000658218	1.6215	0.244274	-2.73076	-1.00827
Tmem56	transmembrane protein 56	5.92079	14.4498	5.51659	4.28887	5.48206	4.99447	yes	0.000658218	8.62906	4.9218	-0.810017	-1.00709
Sorcs3	sortilin-related VPS10 domain containing receptor 3	1.84711	1.53495	1.63099	0.244157	0.297429	0.264272	yes	0.000658218	1.67102	0.268619	-2.63709	-1.00696
Lpin1	lipin 1	15.036	14.4743	16.4139	11.3368	9.88681	9.43941	yes	0.000658218	15.3081	10.221	-0.582755	-1.00681
Cry1	cryptochrome 1 (photolyase-like)	28.4948	19.7452	14.0837	11.9005	21.1734	11.2782	yes	0.0180095	20.7746	14.784	-0.490778	-1.0046
Lrp3	low density lipoprotein receptor-related protein 3	2.73689	1.765	2.94645	0.767638	0.797954	0.525755	yes	0.000658218	2.48278	0.697116	-1.83249	-1.00137
Aldh6a1	aldehyde dehydrogenase family 6, subfamily A1	19.961	17.7991	22.1782	15.0497	14.9161	12.44	yes	0.0268012	19.9794	14.1353	-0.499217	-1.00058
Mpi	mannose phosphate isomerase	19.8471	18.1075	20.8047	13.3104	14.6489	13.4837	yes	0.0439838	19.5864	13.8143	-0.503689	-0.998747
Tmem86a	transmembrane protein 86A	9.60354	11.2966	10.7413	6.71149	6.87536	5.76981	yes	0.0231963	10.5471	6.45222	-0.708985	-0.993184
Slc26a7	solute carrier family 26, member 7	10.2888	6.50966	8.34081	3.57684	4.98547	5.77145	yes	0.00563807	8.37976	4.77792	-0.810526	-0.992966
Fbxo32	F-box protein 32	24.1221	15.7349	22.0056	19.5277	15.8433	8.78783	yes	0.00518114	20.6209	14.7196	-0.486366	-0.992678
Kif7	kinesin family member 7	9.96391	8.46551	10.6553	5.54367	6.2299	5.62649	yes	0.000658218	9.69491	5.80002	-0.741169	-0.989464
Cyp4f39	cytochrome P450, family 4, subfamily f, polypeptide 39	7.37201	17.867	7.78868	4.86367	8.44543	7.19483	yes	0.0081231	11.0092	6.83464	-0.687776	-0.988255
Tnfrsf25	tumor necrosis factor receptor superfamily, member 25	1.90795	2.02917	2.11076	0.681212	0.655704	0.0565606	yes	0.0113598	2.01596	0.464492	-2.11774	-0.985093
Rbp1	retinol binding protein 1, cellular	6.97383	9.41282	6.54631	3.74539	3.63918	5.35966	yes	0.00470227	7.64432	4.24808	-0.847578	-0.984836
Ptprk	protein tyrosine phosphatase, receptor type, K	5.23384	6.36601	4.73407	2.55686	2.78526	2.6028	yes	0.000658218	5.44464	2.64831	-1.03977	-0.982959
Cyp17a1	cytochrome P450, family 17, subfamily a, polypeptide 1	2.09532	5.33599	0.651037	1.32409	0.82203	0.38914	yes	0.00608033	2.69412	0.845087	-1.67264	-0.982859
Tifa	TRAF-interacting protein with forkhead-associated domain	25.1721	13.0186	28.7153	12.1766	17.371	19.0777	yes	0.0458491	22.302	16.2084	-0.460428	-0.981934
Cmpk2	cytidine monophosphate (UMP-CMP) kinase 2, mitochondrial	2.68764	2.86272	6.87521	0.806459	1.4865	3.04339	yes	0.00122911	4.14186	1.77878	-1.21939	-0.971165
Fam189a2	family with sequence similarity 189, member A2	14.6829	11.4151	25.8831	11.3477	11.5295	13.3234	yes	0.0207306	17.327	12.0669	-0.521974	-0.970222
Zscan26	zinc finger and SCAN domain containing 26	26.5241	23.7704	23.2424	18.326	17.4436	18.7577	yes	0.0154745	24.5123	18.1758	-0.43149	-0.969836
Fam222a	family with sequence similarity 222, member A	2.30035	1.68337	3.00791	0.688247	0.765052	0.512167	yes	0.00122911	2.33054	0.655155	-1.83076	-0.9696
Rassf2	Ras association (RalGDS/AF-6) domain family member 2	8.60115	9.05752	7.7676	4.68927	5.90544	4.19367	yes	0.000658218	8.47542	4.92946	-0.781856	-0.968507
Sgk3	serum/glucocorticoid regulated kinase 3	13.0963	10.5759	13.4529	8.35273	8.42211	7.24663	yes	0.000658218	12.375	8.00716	-0.62807	-0.967487
Car8	carbonic anhydrase 8	3.40167	2.83757	3.40467	0.800824	1.31064	1.45922	yes	0.000658218	3.21464	1.19023	-1.43342	-0.964566
Vegfc	vascular endothelial growth factor C	16.1932	13.3249	14.3025	9.31055	8.19074	12.0135	yes	0.035617	14.6069	9.83826	-0.570171	-0.964484
Pnpla5	patatin-like phospholipase domain containing 5	5.58807	8.86192	3.87042	2.31365	3.52174	3.68684	yes	0.0241471	6.1068	3.17408	-0.94408	-0.962669
Plch1	phospholipase C, eta 1	1.59432	1.37948	1.55457	0.198377	0.243857	0.276977	yes	0.000658218	1.50946	0.239737	-2.6545	-0.960039
St5	suppression of tumorigenicity 5	19.343	17.5858	20.2268	14.1994	13.418	13.1409	yes	0.00853522	19.0519	13.5861	-0.487801	-0.95673
Lama1	laminin, alpha 1	2.24252	2.11882	1.15406	0.365383	0.383903	0.470867	yes	0.000658218	1.83847	0.406718	-2.1764	-0.955522
Nav2	neuron navigator 2	21.2591	21.6619	27.9751	16.591	17.0548	18.9279	yes	0.0113598	23.632	17.5246	-0.431365	-0.95201
Pde1c	phosphodiesterase 1C	9.54151	11.7182	7.40492	6.192	5.95698	5.3252	yes	0.00280352	9.55488	5.82473	-0.714047	-0.95116
Otud1	OTU domain containing 1	11.0361	10.3068	13.2956	6.66276	6.85938	8.70348	yes	0.00771655	11.5462	7.40854	-0.640153	-0.95037
Asph	aspartate-beta-hydroxylase	15.1782	16.8774	16.7148	11.2312	11.9529	10.6702	yes	0.0190475	16.2568	11.2848	-0.526667	-0.947414
Tob2	transducer of ERBB2, 2	24.055	20.3386	30.2187	17.5722	20.6911	17.7495	yes	0.0287716	24.8708	18.6709	-0.413657	-0.939566
Acad10	acyl-Coenzyme A dehydrogenase family, member 10	5.69524	4.04983	8.36219	3.03754	3.0686	3.45195	yes	0.00122911	6.03575	3.18603	-0.921774	-0.938416
4932438H23Rik	RIKEN cDNA 4932438H23 gene	4.92785	4.38501	4.20788	2.13771	2.14119	2.03944	yes	0.0081231	4.50691	2.10611	-1.09756	-0.933589
Cpeb3	cytoplasmic polyadenylation element binding protein 3	8.1706	7.2356	9.11698	4.64379	4.90371	4.93565	yes	0.000658218	8.17439	4.82772	-0.759771	-0.928126
Msh3	mutS homolog 3	13.2496	11.5597	10.2679	7.67609	7.48297	7.69127	yes	0.00936199	11.6924	7.61678	-0.618319	-0.927496
A230001M10Rik	RIKEN cDNA A230001M10 gene	2.06615	3.26018	1.39124	0.84473	0.511896	0.623605	yes	0.00563807	2.23919	0.660077	-1.76227	-0.927404
Aldoc	aldolase C, fructose-bisphosphate	12.0255	6.76809	10.7352	6.36036	7.66877	4.37978	yes	0.0110021	9.84293	6.1363	-0.681718	-0.927259
Slc30a2	solute carrier family 30 (zinc transporter), member 2	1.9667	2.67423	1.92334	0.753688	0.47561	0.666447	yes	0.00177006	2.18809	0.631915	-1.79187	-0.926688
Rapsn	receptor-associated protein of the synapse	7.78942	6.3218	8.01532	3.38406	2.75625	6.52145	yes	0.0475606	7.37551	4.22059	-0.8053	-0.926474
4930523C07Rik	RIKEN cDNA 4930523C07 gene	5.3654	7.32155	5.40155	3.7074	3.45	2.49314	yes	0.00229676	6.0295	3.21685	-0.906391	-0.924977
Rara	retinoic acid receptor, alpha	10.6779	10.8609	13.1363	7.72994	7.11809	7.70745	yes	0.0073311	11.5584	7.51849	-0.620422	-0.924942
4833420G17Rik	RIKEN cDNA 4833420G17 gene	14.5901	12.9934	6.59501	8.51091	7.16609	6.48785	yes	0.0154745	11.3928	7.38828	-0.624816	-0.924045
Ttyh3	tweety family member 3	18.1678	14.2923	24.9678	13.8988	13.4248	14.1892	yes	0.00853522	19.1426	13.8376	-0.468196	-0.923764
Dyrk1b	dual-specificity tyrosine-(Y)-phosphorylation regulated kinase 1b	11.819	9.57166	19.1954	9.90418	8.33552	9.15509	yes	0.0180095	13.5287	9.1316	-0.567083	-0.923704
Svip	small VCP/p97-interacting protein	9.30244	8.25801	9.51655	5.16454	5.86491	5.49075	yes	0.00896147	9.02567	5.50673	-0.712837	-0.923086
Dusp18	dual specificity phosphatase 18	14.1015	17.5607	14.0915	10.8888	11.3638	9.43305	yes	0.00518114	15.2512	10.5619	-0.530059	-0.92298
Fhdc1	FH2 domain containing 1	9.06338	9.11648	8.6656	5.6482	6.54912	4.14452	yes	0.000658218	8.94849	5.44728	-0.716108	-0.922785
Dync2h1	dynein cytoplasmic 2 heavy chain 1	6.74552	7.59654	6.19737	4.08441	4.05068	3.43477	yes	0.000658218	6.84648	3.85662	-0.828025	-0.913894
Rnf135	ring finger protein 135	7.87917	5.81836	10.1281	4.39123	5.32254	4.40158	yes	0.0245117	7.94188	4.70512	-0.755249	-0.910158
Sept4	septin 4	3.29679	6.24353	4.55485	1.84493	1.75016	3.32433	yes	0.0450846	4.69839	2.30647	-1.02648	-0.903746
Brinp2	bone morphogenic protein/retinoic acid inducible neural-specific 2	2.0861	4.05236	4.10397	0.941161	1.64209	1.69761	yes	0.00177006	3.41414	1.42695	-1.25859	-0.903166
Rdh1	retinol dehydrogenase 1 (all trans)	3.6966	12.3221	3.34423	2.16235	4.46554	4.17326	yes	0.00229676	6.45431	3.60038	-0.842112	-0.900033
2810410L24Rik	RIKEN cDNA 2810410L24 gene	6.13833	5.75469	10.3903	4.37431	4.1513	4.50255	yes	0.0409964	7.42777	4.34272	-0.774331	-0.899219
Megf6	multiple EGF-like-domains 6	5.36489	4.87144	6.68102	3.27138	3.4812	2.25853	yes	0.000658218	5.63912	3.0037	-0.908727	-0.89644
Adgrl1	adhesion G protein-coupled receptor L1	10.6904	10.4309	11.4514	7.79407	7.01012	6.42156	yes	0.000658218	10.8576	7.07525	-0.617848	-0.893169
Lrrc34	leucine rich repeat containing 34	11.3423	4.34697	11.5629	6.66353	7.1431	3.16369	yes	0.045332	9.08406	5.65677	-0.683357	-0.892666
Nnt	nicotinamide nucleotide transhydrogenase	9.11848	7.86135	5.67167	4.78277	3.8779	4.72611	yes	0.00326971	7.5505	4.46226	-0.758798	-0.891024
Pdk2	pyruvate dehydrogenase kinase, isoenzyme 2	11.2944	7.3373	14.005	7.28611	6.27885	7.77597	yes	0.0254706	10.8789	7.11364	-0.612872	-0.887663
Dzip1l	DAZ interacting protein 1-like	13.5661	12.4685	13.0971	8.74746	9.89717	8.0688	yes	0.00608033	13.0439	8.90448	-0.550773	-0.883565
Sash1	SAM and SH3 domain containing 1	14.7117	17.2123	14.6869	12.011	10.385	10.5676	yes	0.00326971	15.537	10.9879	-0.499794	-0.883282
Paip2b	poly(A) binding protein interacting protein 2B	24.6676	19.1023	27.6333	18.6535	18.7087	16.9345	yes	0.0412604	23.8011	18.0989	-0.395124	-0.880913
Tbc1d31	TBC1 domain family, member 31	6.75107	6.19874	5.81133	4.17978	4.12387	2.20603	yes	0.00326971	6.25371	3.50323	-0.836029	-0.880547
Plekhb1	pleckstrin homology domain containing, family B (evectins) member 1	1.02527	1.81097	2.00435	0.285129	0.754374	0.101661	yes	0.000658218	1.61353	0.380388	-2.08468	-0.873292
Sfrp2	secreted frizzled-related protein 2	1.56385	0.90423	1.3851	0.248025	0.354324	0.0443182	yes	0.0147786	1.28439	0.215556	-2.57495	-0.872717
Rnf19a	ring finger protein 19A	25.4972	23.7707	23.7675	17.7147	18.9058	19.2616	yes	0.0362507	24.3451	18.6274	-0.38621	-0.87223
Trim14	tripartite motif-containing 14	6.93787	4.73886	14.9908	3.88529	3.92057	8.92518	yes	0.010183	8.88918	5.57701	-0.672557	-0.870833
Ppp1r10	protein phosphatase 1, regulatory subunit 10	14.9639	13.3738	19.4945	12.5349	10.7564	10.8855	yes	0.0113598	15.9441	11.3923	-0.484965	-0.870589
Abca8a	ATP-binding cassette, sub-family A (ABC1), member 8a	0.973221	1.98621	1.20664	0.279968	0.337346	0.191498	yes	0.000658218	1.38869	0.269604	-2.36481	-0.869026
Sptlc3	serine palmitoyltransferase, long chain base subunit 3	6.0412	11.8762	5.7219	3.45085	5.5471	5.39491	yes	0.0140569	7.87977	4.79762	-0.715834	-0.865642
Asb13	ankyrin repeat and SOCS box-containing 13	8.27337	7.41458	8.79494	5.84533	5.02455	4.18897	yes	0.0194098	8.16096	5.01962	-0.701162	-0.865264
Ugt1a1	UDP glucuronosyltransferase 1 family, polypeptide A1	6.19658	12.7703	5.36855	4.31985	6.42692	4.1971	yes	0.0257974	8.11181	4.98129	-0.703504	-0.865158
Jak2	Janus kinase 2	21.3727	20.658	21.6233	16.263	16.8035	14.7689	yes	0.0197309	21.218	15.9451	-0.412173	-0.864949
Gpatch8	G patch domain containing 8	15.7947	14.3295	14.7536	10.8838	11.4076	9.49533	yes	0.00424048	14.9593	10.5956	-0.497577	-0.863212
Dlc1	deleted in liver cancer 1	10.793	8.67772	11.4363	6.56587	7.95069	5.74054	yes	0.00122911	10.3023	6.75237	-0.609507	-0.859613
Rbm11	RNA binding motif protein 11	5.827	3.76299	5.00121	2.26316	3.47679	1.85214	yes	0.0113598	4.86373	2.5307	-0.94253	-0.857964
Wee1	WEE 1 homolog 1 (S. pombe)	9.6829	15.6885	7.71868	6.10501	8.53972	7.46124	yes	0.0121266	11.03	7.36866	-0.581963	-0.853592
Ncoa3	nuclear receptor coactivator 3	11.3672	12.0342	11.1561	8.0992	7.72659	7.53037	yes	0.00122911	11.5192	7.78539	-0.565196	-0.849804
Ctso	cathepsin O	9.40868	7.82243	10.2211	5.37815	5.93653	6.27943	yes	0.00978581	9.15074	5.8647	-0.64183	-0.848014
Mical3	microtubule associated monooxygenase, calponin and LIM domain containing 3	19.4488	17.8865	27.3834	16.1951	16.2612	16.6265	yes	0.0231963	21.5729	16.3609	-0.398965	-0.84623
Gpr153	G protein-coupled receptor 153	2.15015	2.04577	3.3995	0.743726	1.04359	1.07071	yes	0.00177006	2.53181	0.952675	-1.41011	-0.845959
Cntfr	ciliary neurotrophic factor receptor	8.33368	8.02217	13.0316	6.28211	6.23096	6.74761	yes	0.0434278	9.79582	6.42023	-0.609542	-0.838257
Zbtb43	zinc finger and BTB domain containing 43	9.88602	9.82127	10.449	6.37145	6.75894	6.75667	yes	0.00122911	10.0521	6.62902	-0.600629	-0.838116
Slc25a23	solute carrier family 25 (mitochondrial carrier; phosphate carrier), member 23	11.7942	6.91462	12.7751	6.61703	7.17881	7.19203	yes	0.0137049	10.4946	6.99596	-0.585059	-0.83657
Klf15	Kruppel-like factor 15	12.3087	7.63721	11.5843	7.0248	6.92835	7.08909	yes	0.0423285	10.5101	7.01408	-0.583446	-0.835125
Cds1	CDP-diacylglycerol synthase 1	7.97142	14.1353	7.98516	5.09238	8.84445	5.94448	yes	0.006476	10.0306	6.6271	-0.597961	-0.833913
Hpse	heparanase	8.11011	7.71808	8.49318	5.46044	5.16499	4.62389	yes	0.0110021	8.10712	5.08311	-0.67348	-0.832641
Cbx5	chromobox 5	17.8879	23.1567	19.8826	15.8947	14.9987	15.1411	yes	0.0281261	20.3091	15.3448	-0.404371	-0.831378
2610035D17Rik	RIKEN cDNA 2610035D17 gene	4.71995	4.51414	3.88976	2.90818	2.02468	1.79212	yes	0.0359236	4.37462	2.24166	-0.964589	-0.82923
A530016L24Rik	RIKEN cDNA A530016L24 gene	1.15414	2.83899	2.16187	0.313124	0.203034	1.53971	yes	0.00771655	2.05167	0.685289	-1.58201	-0.825918
Med17	mediator complex subunit 17	21.7705	18.4966	17.2562	13.7603	15.644	13.8229	yes	0.0359236	19.1744	14.4091	-0.412207	-0.822306
Chd6	chromodomain helicase DNA binding protein 6	13.9702	16.0172	13.4147	10.8398	10.7492	9.52909	yes	0.00280352	14.4674	10.3727	-0.480011	-0.821566
2310015A10Rik	RIKEN cDNA 2310015A10 gene	6.31599	7.98472	6.66576	4.81893	3.92117	3.9849	yes	0.00177006	6.98882	4.24167	-0.720418	-0.819755
Glcci1	glucocorticoid induced transcript 1	8.09546	10.0205	7.66693	5.48327	4.98752	6.09894	yes	0.00122911	8.5943	5.52324	-0.637864	-0.81735
Sema3a	sema domain, immunoglobulin domain (Ig), short basic domain, secreted, (semaphorin) 3A	0.826107	2.05269	0.920996	0.263883	0.282185	0.230785	yes	0.000658218	1.2666	0.258951	-2.29021	-0.815822
Tanc1	tetratricopeptide repeat, ankyrin repeat and coiled-coil containing 1	19.1363	22.4432	20.5396	15.5801	15.6117	16.1582	yes	0.0278271	20.7064	15.7833	-0.391673	-0.814981
Zc3h12c	zinc finger CCCH type containing 12C	7.13426	6.37368	6.20285	4.23641	3.06647	4.50465	yes	0.00122911	6.57026	3.93584	-0.739278	-0.812763
Aadacl3	arylacetamide deacetylase like 3	2.94884	10.6679	2.63219	2.25579	4.20381	2.7022	yes	0.0113598	5.41631	3.05393	-0.826642	-0.811711
Fam214a	family with sequence similarity 214, member A	7.44088	7.22347	6.27126	5.30293	4.30419	3.16847	yes	0.00518114	6.97854	4.25853	-0.712569	-0.811416
Acacb	acetyl-Coenzyme A carboxylase beta	3.78719	11.489	2.76849	2.98419	4.75946	2.81161	yes	0.000658218	6.01489	3.51842	-0.773611	-0.808546
Dock10	dedicator of cytokinesis 10	2.41269	2.32638	1.80206	0.665854	0.602427	1.0999	yes	0.000658218	2.18038	0.789394	-1.46576	-0.807161
Trim12c	tripartite motif-containing 12C	6.63952	6.35266	8.55985	4.42318	3.01159	5.87124	yes	0.0121266	7.18401	4.43534	-0.695746	-0.806366
Dstyk	dual serine/threonine and tyrosine protein kinase	25.3146	16.3644	17.9678	16.681	13.4221	15.2721	yes	0.0290654	19.8823	15.1251	-0.394541	-0.804029
Arl5b	ADP-ribosylation factor-like 5B	8.3381	9.90666	8.37578	5.76906	5.08612	6.53567	yes	0.0073311	8.87351	5.79695	-0.614211	-0.803237
Pde7b	phosphodiesterase 7B	6.01667	9.00313	5.7623	2.38557	2.31229	8.08646	yes	0.00896147	6.92737	4.26144	-0.700966	-0.796996
Sspn	sarcospan	12.5742	9.51458	12.118	8.2996	8.00931	7.39462	yes	0.0144247	11.4023	7.90118	-0.52918	-0.796866
Ces4a	carboxylesterase 4A	5.81955	11.3384	4.71452	3.81827	3.57874	6.25443	yes	0.035617	7.29082	4.55048	-0.680063	-0.796352
Sema4b	sema domain, immunoglobulin domain (Ig), transmembrane domain (TM) and short cytoplasmic domain, (semaphorin) 4B	13.291	16.7737	16.5437	13.0661	10.8831	10.3091	yes	0.0346489	15.5361	11.4194	-0.444136	-0.792912
Rbms3	RNA binding motif, single stranded interacting protein	3.30692	1.93086	1.19074	1.38151	0.383837	0.594947	yes	0.000658218	2.14284	0.786765	-1.44552	-0.792281
Rhpn1	rhophilin, Rho GTPase binding protein 1	1.4029	1.37696	2.4998	0.610584	0.50892	0.549863	yes	0.00853522	1.75989	0.556456	-1.66114	-0.790715
Nebl	nebulette	15.8073	13.5382	15.8075	11.1884	13.6061	8.26684	yes	0.0425866	15.051	11.0204	-0.449677	-0.789373
Flrt2	fibronectin leucine rich transmembrane protein 2	3.59181	3.86752	2.27266	1.37261	2.01545	1.17983	yes	0.000658218	3.244	1.52263	-1.09121	-0.788438
Map7	microtubule-associated protein 7	13.5338	15.4944	10.5229	8.89823	10.6465	8.77615	yes	0.0238731	13.1837	9.44029	-0.481852	-0.787014
Pbx1	pre B cell leukemia homeobox 1	14.8108	15.5745	13.917	11.132	10.5073	10.7312	yes	0.0137049	14.7674	10.7902	-0.452702	-0.786728
Ric1	RAB6A GEF complex partner 1	18.7943	21.4998	21.1719	16.1653	15.1862	15.9505	yes	0.0407075	20.4887	15.7673	-0.377887	-0.784106
Tmem177	transmembrane protein 177	12.7345	9.68728	13.5255	8.53195	7.84427	8.95494	yes	0.0317532	11.9824	8.44372	-0.504969	-0.782981
Gulp1	GULP, engulfment adaptor PTB domain containing 1	14.4536	11.6248	13.2883	9.53545	10.0923	8.6237	yes	0.044637	13.1222	9.41715	-0.478651	-0.780417
Bach1	BTB and CNC homology 1, basic leucine zipper transcription factor 1	16.7869	17.2648	16.7892	12.7717	11.3496	14.0017	yes	0.0228552	16.947	12.7077	-0.415328	-0.778481
Ksr1	kinase suppressor of ras 1	4.51193	3.87252	5.2312	2.10413	2.53939	2.81653	yes	0.006476	4.53855	2.48668	-0.868009	-0.774139
Notum	notum palmitoleoyl-protein carboxylesterase	2.78689	1.62016	1.66539	0.911983	0.974363	0.351034	yes	0.0194098	2.02415	0.745793	-1.44047	-0.768096
Rab44	RAB44, member RAS oncogene family	4.25416	4.128	5.33658	1.81554	2.19921	3.57564	yes	0.00326971	4.57291	2.53013	-0.853902	-0.766479
Kif19a	kinesin family member 19A	1.28544	0.962765	1.93517	0.352936	0.501427	0.271489	yes	0.00177006	1.39446	0.375284	-1.89365	-0.766114
Pnpla7	patatin-like phospholipase domain containing 7	8.7818	9.69146	9.01041	5.59172	6.55527	6.34427	yes	0.0081231	9.16122	6.16375	-0.571731	-0.765693
Cyp1a1	cytochrome P450, family 1, subfamily a, polypeptide 1	2.5317	5.13524	2.69134	1.54917	2.1306	1.48333	yes	0.0133484	3.45276	1.72103	-1.00448	-0.761333
Tbc1d4	TBC1 domain family, member 4	7.92813	8.14828	6.99381	4.77321	5.45119	4.71906	yes	0.00280352	7.69007	4.98115	-0.626518	-0.761004
Zfp276	zinc finger protein (C2H2 type) 276	12.4734	12.4452	13.9485	9.97712	9.86331	8.29055	yes	0.0330639	12.9557	9.37699	-0.46639	-0.757278
Crebrf	CREB3 regulatory factor	13.4522	9.5608	12.4368	9.37851	7.27768	8.59029	yes	0.00470227	11.8166	8.41549	-0.489695	-0.756136
D16Ertd472e	DNA segment, Chr 16, ERATO Doi 472, expressed	4.53948	4.40951	3.15064	1.86147	2.38989	2.20737	yes	0.000658218	4.03321	2.15291	-0.905641	-0.755993
Slc2a13	solute carrier family 2 (facilitated glucose transporter), member 13	5.02122	3.93533	5.28201	2.63847	3.13421	2.30239	yes	0.000658218	4.74619	2.69169	-0.818257	-0.753323
Rdh9	retinol dehydrogenase 9	3.06097	8.36899	2.17997	1.6281	3.36508	2.6196	yes	0.0224979	4.53664	2.53759	-0.838164	-0.751595
Phc1	polyhomeotic 1	14.5349	12.7113	14.1998	9.89592	10.0904	10.444	yes	0.033379	13.8153	10.1434	-0.445723	-0.750167
Sdr42e1	short chain dehydrogenase/reductase family 42E, member 1	5.78082	12.155	4.94769	4.84468	5.92153	4.14899	yes	0.0297204	7.62784	4.97173	-0.617525	-0.748285
Zpld1	zona pellucida like domain containing 1	0.98865	1.07325	1.12076	0.0798385	0.23665	0.334046	yes	0.00691313	1.06089	0.216845	-2.29054	-0.746697
Cer1	cerberus 1, DAN family BMP antagonist	2.04806	2.66195	2.25057	1.4106	0.829552	0.672983	yes	0.0434278	2.32019	0.971045	-1.25663	-0.74367
Irs3	insulin receptor substrate 3	1.50087	1.12631	3.58942	0.953304	0.927054	0.560191	yes	0.0187083	2.0722	0.813516	-1.34892	-0.740951
Sned1	sushi, nidogen and EGF-like domains 1	2.34987	1.9684	2.76307	1.08054	1.08644	0.858714	yes	0.00326971	2.36045	1.00856	-1.22676	-0.736525
Lgr4	leucine-rich repeat-containing G protein-coupled receptor 4	10.8715	13.854	8.65515	8.42871	8.27488	7.04257	yes	0.0203775	11.1269	7.91539	-0.491318	-0.73595
Sntb2	syntrophin, basic 2	12.6623	12.1001	13.3038	9.37858	9.41356	8.93648	yes	0.0323909	12.6887	9.24287	-0.457135	-0.735804
Foxo1	forkhead box O1	15.7058	11.0836	15.4051	10.0465	11.1742	10.077	yes	0.0251741	14.0648	10.4326	-0.430998	-0.733868
Ppargc1a	peroxisome proliferative activated receptor, gamma, coactivator 1 alpha	1.95089	2.68623	2.33028	1.17681	0.8745	0.916988	yes	0.00122911	2.32247	0.989433	-1.23098	-0.732492
Adgra3	adhesion G protein-coupled receptor A3	3.74405	4.42736	5.42129	2.26978	1.94298	3.54117	yes	0.00177006	4.5309	2.58464	-0.809832	-0.729619
Kcnn3	potassium intermediate/small conductance calcium-activated channel, subfamily N, member 3	1.08045	0.925514	1.15947	0.195658	0.198725	0.301164	yes	0.000658218	1.05514	0.231849	-2.18618	-0.725718
Zfp217	zinc finger protein 217	17.1501	16.8841	16.4916	13.036	12.5763	13.0469	yes	0.0428191	16.8419	12.8864	-0.386208	-0.725471
Pank1	pantothenate kinase 1	4.5495	7.71889	3.95862	3.11383	3.44547	3.27604	yes	0.00122911	5.409	3.27845	-0.72235	-0.722848
Mfap3l	microfibrillar-associated protein 3-like	8.82988	8.11096	6.3953	5.11514	7.03247	3.39952	yes	0.00326971	7.77871	5.18238	-0.585918	-0.721174
Panx3	pannexin 3	3.59109	8.44523	2.88725	1.81087	4.7575	2.27227	yes	0.0404412	4.97452	2.94688	-0.75537	-0.720428
Slc25a10	solute carrier family 25 (mitochondrial carrier, dicarboxylate transporter), member 10	13.0129	11.5979	13.1793	9.38028	9.41201	8.90272	yes	0.039271	12.5967	9.23167	-0.448382	-0.720242
Gk5	glycerol kinase 5 (putative)	5.78515	9.83007	5.85616	5.34024	5.04864	3.66722	yes	0.0477726	7.15713	4.68537	-0.611219	-0.718265
Zfp651	zinc finger protein 651	4.95629	4.66359	5.90877	3.48908	2.65962	3.21553	yes	0.00229676	5.17622	3.12141	-0.7297	-0.713336
Rsad2	radical S-adenosyl methionine domain containing 2	1.78517	1.62863	5.01309	0.371027	0.687617	3.00465	yes	0.0113598	2.80896	1.35443	-1.05235	-0.712852
Hmcn1	hemicentin 1	10.6259	14.8953	9.2575	10.6534	7.54138	7.08112	yes	0.0073311	11.5929	8.4253	-0.460442	-0.707975
Bahcc1	BAH domain and coiled-coil containing 1	5.2836	4.66356	6.26634	3.99951	2.9908	2.95537	yes	0.000658218	5.4045	3.31523	-0.705054	-0.707528
Kcnip3	Kv channel interacting protein 3, calsenilin	1.71009	1.59644	2.91373	0.721467	1.16428	0.702088	yes	0.0105984	2.07342	0.862612	-1.26523	-0.706635
Celsr2	cadherin, EGF LAG seven-pass G-type receptor 2	6.58766	9.3742	6.60551	5.62387	5.02283	4.41915	yes	0.00177006	7.52246	5.02195	-0.582956	-0.705997
Oasl2	2'-5' oligoadenylate synthetase-like 2	1.68391	0.953723	3.86454	0.237701	0.480494	2.06557	yes	0.0241471	2.16739	0.927922	-1.22388	-0.704504
Zfp521	zinc finger protein 521	6.26477	4.74291	7.14711	3.66111	3.09257	4.83958	yes	0.00326971	6.0516	3.86442	-0.647064	-0.694569
Abca4	ATP-binding cassette, sub-family A (ABC1), member 4	1.18483	0.807872	1.32173	0.223848	0.229085	0.407486	yes	0.000658218	1.10481	0.286806	-1.94565	-0.693419
Mob3c	MOB kinase activator 3C	5.07133	4.87002	4.76151	3.10159	3.39534	2.38029	yes	0.0409964	4.90095	2.95907	-0.727917	-0.692644
2610008E11Rik	RIKEN cDNA 2610008E11 gene	8.59387	8.38939	9.21348	6.45597	6.34096	5.40627	yes	0.0290654	8.73225	6.06773	-0.525195	-0.692608
Lrrc16a	capping protein regulator and myosin 1 linker 1	12.9185	10.5158	13.828	9.20462	8.72023	9.73547	yes	0.0310161	12.4208	9.22011	-0.429899	-0.688022
Sox12	SRY (sex determining region Y)-box 12	6.75699	7.90909	7.64709	5.2436	4.86781	4.93599	yes	0.0137049	7.43772	5.0158	-0.568381	-0.6863
Sec14l4	SEC14-like lipid binding 4	3.29974	9.32949	3.77837	3.56558	3.44909	3.28856	yes	0.0404412	5.4692	3.43441	-0.671268	-0.681925
Cdo1	cysteine dioxygenase 1, cytosolic	0.636844	2.20961	0.467711	0.434129	0.160701	0.300136	yes	0.0450846	1.10472	0.298322	-1.88874	-0.680792
Fat1	FAT atypical cadherin 1	11.9387	14.6393	11.2732	10.6743	8.87928	8.7306	yes	0.0173238	12.6171	9.42806	-0.420344	-0.679202
Pcolce	procollagen C-endopeptidase enhancer protein	0.843365	1.6173	1.65928	0.526963	0.425604	0.417363	yes	0.0395651	1.37332	0.456643	-1.58852	-0.677631
Arhgef16	Rho guanine nucleotide exchange factor (GEF) 16	2.56868	2.28497	2.1636	0.732104	0.926061	1.61696	yes	0.0257974	2.33908	1.09171	-1.09936	-0.673441
Cdh4	cadherin 4	1.14984	0.952004	1.25364	0.298085	0.343	0.2987	yes	0.000658218	1.11849	0.313262	-1.83612	-0.672957
Ankfn1	ankyrin-repeat and fibronectin type III domain containing 1	0.859123	0.649671	0.834135	0.0313662	0.104573	0.275074	yes	0.0372052	0.780976	0.137004	-2.51106	-0.672125
Sema5a	sema domain, seven thrombospondin repeats (type 1 and type 1-like), transmembrane domain (TM) and short cytoplasmic domain, (semaphorin) 5A	5.10016	4.92184	5.81245	3.73682	2.92797	3.26337	yes	0.000658218	5.27815	3.30939	-0.673468	-0.67183
Nfatc1	nuclear factor of activated T cells, cytoplasmic, calcineurin dependent 1	11.5724	12.2701	12.8679	8.91321	9.83532	8.65629	yes	0.0488229	12.2368	9.13494	-0.421759	-0.670969
Tgfb2	transforming growth factor, beta 2	4.41354	5.02768	3.16394	1.99856	1.69422	3.73797	yes	0.00936199	4.20172	2.47692	-0.762435	-0.667415
Nhsl1	NHS-like 1	12.8924	9.13583	12.3678	8.71549	7.95137	8.78622	yes	0.0264624	11.4653	8.48436	-0.434402	-0.667408
Gimap8	GTPase, IMAP family member 8	1.7881	1.1825	1.63064	0.586984	0.633269	0.485593	yes	0.0073311	1.53375	0.568615	-1.43154	-0.66563
Paqr8	progestin and adipoQ receptor family member VIII	6.04978	6.3866	8.14057	4.09295	5.58548	4.14055	yes	0.0238731	6.85898	4.60633	-0.574378	-0.665276
Zbtb18	zinc finger and BTB domain containing 18	9.18698	8.92677	10.8379	6.71732	7.40007	6.72076	yes	0.0423285	9.65055	6.94605	-0.474418	-0.663861
Pced1b	PC-esterase domain containing 1B	1.74504	1.47456	1.87227	0.828333	0.566473	0.638493	yes	0.0477726	1.69729	0.677766	-1.32437	-0.661546
Sema7a	sema domain, immunoglobulin domain (Ig), and GPI membrane anchor, (semaphorin) 7A	0.931615	1.06261	1.22051	0.164991	0.160511	0.570888	yes	0.0133484	1.07158	0.298797	-1.8425	-0.660142
Atad2	ATPase family, AAA domain containing 2	10.8709	11.3597	8.70271	8.37657	8.99656	5.2091	yes	0.0261553	10.3111	7.52741	-0.453973	-0.659086
Angel1	angel homolog 1	5.3521	4.30863	6.46752	3.60901	3.62728	3.06042	yes	0.0293935	5.37608	3.43224	-0.647406	-0.654961
Nek1	NIMA (never in mitosis gene a)-related expressed kinase 1	8.04844	7.21198	8.26893	5.81649	5.75439	4.79741	yes	0.0190475	7.84312	5.4561	-0.523558	-0.65455
Kcng3	potassium voltage-gated channel, subfamily G, member 3	2.18894	1.47923	2.01051	0.401801	1.09452	0.960762	yes	0.0162666	1.89289	0.819028	-1.20861	-0.652096
Ramp1	receptor (calcitonin) activity modifying protein 1	1.14923	0.992197	1.74761	0.487282	0.451659	0.374149	yes	0.00896147	1.29635	0.437697	-1.56645	-0.652057
Ppp1r16b	protein phosphatase 1, regulatory subunit 16B	4.91596	4.92396	5.36547	3.06933	2.86965	3.68487	yes	0.00518114	5.06846	3.20795	-0.659897	-0.646713
Bmp7	bone morphogenetic protein 7	5.38801	7.91845	6.15765	4.12631	4.62882	4.36896	yes	0.0412604	6.48804	4.3747	-0.568599	-0.641209
Srrm4	serine/arginine repetitive matrix 4	1.71784	2.04792	1.62533	0.754595	0.733279	0.822436	yes	0.0081231	1.79703	0.770103	-1.22249	-0.640937
Vipr2	vasoactive intestinal peptide receptor 2	1.25199	0.806199	0.701506	0.338395	0.309851	0.0501058	yes	0.00691313	0.919898	0.232784	-1.98248	-0.639992
Acap1	ArfGAP with coiled-coil, ankyrin repeat and PH domains 1	1.35569	1.70191	1.32942	0.529633	0.371796	0.769379	yes	0.0303892	1.46234	0.556936	-1.3927	-0.637154
Lpin2	lipin 2	12.9749	12.1062	11.4845	9.59109	10.022	8.1379	yes	0.0466822	12.1885	9.25033	-0.397948	-0.634572
Prkg2	protein kinase, cGMP-dependent, type II	9.58293	9.3229	9.07522	7.46938	6.22634	6.69012	yes	0.0450846	9.32702	6.79528	-0.456883	-0.630529
Csf1	colony stimulating factor 1 (macrophage)	3.71411	4.11425	4.60166	2.50858	2.72983	2.33577	yes	0.0425866	4.14334	2.52473	-0.714667	-0.62682
Sardh	sarcosine dehydrogenase	4.28704	3.77179	4.82458	2.13368	2.64732	3.16724	yes	0.0221391	4.29447	2.64941	-0.696807	-0.62428
1700017B05Rik	RIKEN cDNA 1700017B05 gene	7.92687	9.51399	8.71474	6.61094	6.71382	5.57844	yes	0.0404412	8.71853	6.30107	-0.468489	-0.62378
Lonrf1	LON peptidase N-terminal domain and ring finger 1	6.92238	7.0972	4.69902	4.00638	4.64387	4.02154	yes	0.0415471	6.23953	4.22393	-0.562852	-0.623114
Hivep1	human immunodeficiency virus type I enhancer binding protein 1	12.6493	11.7408	12.257	9.65185	9.53971	8.8234	yes	0.0395651	12.2157	9.33832	-0.387502	-0.619774
Bend4	BEN domain containing 4	0.767915	0.806849	1.34352	0.35886	0.317549	0.165017	yes	0.000658218	0.972761	0.280475	-1.79421	-0.618399
Cdkn1c	cyclin-dependent kinase inhibitor 1C (P57)	1.36723	0.955279	1.48767	0.449769	0.707918	0.234213	yes	0.0378073	1.27006	0.463967	-1.4528	-0.612149
Tmprss11a	transmembrane protease, serine 11a	0.778075	1.04371	0.835598	0.232814	0.258791	0.227358	yes	0.015118	0.885794	0.239654	-1.88602	-0.609065
Zfat	zinc finger and AT hook domain containing	4.37583	3.21632	5.32008	2.74088	2.61643	2.73284	yes	0.0217648	4.30408	2.69672	-0.6745	-0.607491
Kank4	KN motif and ankyrin repeat domains 4	0.658382	0.778989	1.28363	0.137437	0.183422	0.450856	yes	0.00691313	0.907	0.257238	-1.818	-0.60219
Cep135	centrosomal protein 135	7.53384	5.68469	5.86347	5.15322	4.35706	3.69737	yes	0.0287716	6.36067	4.40255	-0.530839	-0.596853
Rundc3b	RUN domain containing 3B	3.53835	2.32957	2.90718	1.0392	1.68261	2.22726	yes	0.0380618	2.92503	1.64969	-0.826258	-0.596272
Capn5	calpain 5	3.13302	3.08117	4.62113	1.91319	2.28172	2.33901	yes	0.0200754	3.61177	2.17797	-0.729721	-0.59588
Syn2	synapsin II	1.38182	0.859594	1.14687	0.282434	0.49266	0.407873	yes	0.0197309	1.12943	0.394322	-1.51814	-0.595515
Ifih1	interferon induced with helicase C domain 1	2.65676	2.44733	4.30848	0.867182	1.46816	3.13486	yes	0.0113598	3.13752	1.8234	-0.782995	-0.590004
Ajap1	adherens junction associated protein 1	1.62663	1.03082	0.685486	0.730428	0.44294	0.0278329	yes	0.036577	1.11431	0.4004	-1.47664	-0.580069
Drd1	dopamine receptor D1	2.0076	2.24429	2.2555	1.2574	1.0584	1.05463	yes	0.0389988	2.16913	1.12348	-0.949146	-0.576259
Pik3ca	phosphatidylinositol-4,5-bisphosphate 3-kinase catalytic subunit alpha	10.3221	9.82848	11.5642	9.1948	7.53286	7.52258	yes	0.0425866	10.5716	8.08341	-0.387156	-0.576082
C2cd2	C2 calcium-dependent domain containing 2	4.76241	6.10994	4.97368	3.09906	3.62398	4.02908	yes	0.0180095	5.28201	3.58404	-0.5595	-0.57025
Gbp7	guanylate binding protein 7	6.19474	5.51024	9.09467	2.88777	4.01817	8.03124	yes	0.0482462	6.93322	4.97906	-0.477651	-0.56619
Robo2	roundabout guidance receptor 2	1.64241	2.04803	0.981864	0.514503	0.867465	0.75231	yes	0.00177006	1.55743	0.711426	-1.13039	-0.561657
Gm973	predicted gene 973	1.68697	0.93994	1.71153	0.541272	0.871647	0.517059	yes	0.0251741	1.44615	0.643326	-1.16859	-0.555393
Pcsk5	proprotein convertase subtilisin/kexin type 5	0.542324	0.907621	1.0263	0.226295	0.251701	0.271507	yes	0.00122911	0.825415	0.249834	-1.72415	-0.555075
Cubn	cubilin (intrinsic factor-cobalamin receptor)	2.16484	5.47966	3.11803	2.12992	1.51253	3.1335	yes	0.00326971	3.58751	2.25865	-0.667522	-0.549596
Mcc	mutated in colorectal cancers	1.92404	2.53692	1.94935	1.33946	1.10288	0.98297	yes	0.00280352	2.13677	1.14177	-0.90416	-0.549519
Clstn3	calsyntenin 3	1.07626	2.3317	0.939654	0.365869	0.795212	0.817376	yes	0.0336727	1.4492	0.659486	-1.13585	-0.543834
Adgrg6	adhesion G protein-coupled receptor G6	3.35181	3.95775	2.81229	2.20298	2.61753	1.51838	yes	0.0140569	3.37395	2.11296	-0.675171	-0.538327
Thsd4	thrombospondin, type I, domain containing 4	1.15366	0.580965	0.458671	0.0938006	0.25301	0.287713	yes	0.00122911	0.731099	0.211508	-1.78935	-0.535176
Peg12	paternally expressed 12	0.898747	0.636936	1.35354	0.416807	0.376439	0.261649	yes	0.0448614	0.963074	0.351632	-1.45358	-0.533263
Chst10	carbohydrate sulfotransferase 10	1.11634	0.799376	1.34666	0.52167	0.483315	0.300705	yes	0.0399047	1.08746	0.43523	-1.32111	-0.52856
Mylk	myosin, light polypeptide kinase	1.59076	2.22475	1.8249	1.10276	0.894684	1.0065	yes	0.006476	1.88014	1.00131	-0.908942	-0.51772
Prkcq	protein kinase C, theta	0.46912	1.47457	0.631543	0.12222	0.317073	0.512652	yes	0.033379	0.858411	0.317315	-1.43575	-0.499024
Nfia	nuclear factor I/A	4.26927	4.42426	4.994	3.08342	3.04819	3.49068	yes	0.0221391	4.56251	3.20743	-0.50841	-0.486134
Snhg11	small nucleolar RNA host gene 11	1.0889	1.29384	0.347759	0.602217	0.384534	0.126769	yes	0.0129405	0.910166	0.371173	-1.29404	-0.476158
Tmem170b	transmembrane protein 170B	3.82752	5.15874	3.6368	2.95177	3.39429	2.49517	yes	0.0389988	4.20769	2.94708	-0.513743	-0.471284
Atrnl1	attractin like 1	4.90908	3.75067	2.04842	2.83863	2.29938	2.13725	yes	0.0499961	3.56939	2.42509	-0.557641	-0.467375
Ntrk2	neurotrophic tyrosine kinase, receptor, type 2	1.39386	1.59112	1.32037	0.702162	1.03876	0.50612	yes	0.0147786	1.43512	0.749014	-0.938103	-0.464248
Col15a1	collagen, type XV, alpha 1	1.40231	1.56824	1.22401	0.703705	0.714022	0.779273	yes	0.0466822	1.39819	0.732333	-0.932985	-0.45618
Tmem2	cell migration inducing hyaluronidase 2	1.83903	3.47396	2.10694	1.77985	1.43077	1.5533	yes	0.0428191	2.47331	1.58797	-0.639256	-0.439316
Itih5	inter-alpha (globulin) inhibitor H5	0.580084	0.868146	0.86944	0.400003	0.281513	0.268396	yes	0.0154745	0.772557	0.316637	-1.28681	-0.436853
Loxl4	lysyl oxidase-like 4	0.792629	0.714611	0.735202	0.446689	0.362559	0.10667	yes	0.0271556	0.747481	0.305306	-1.29178	-0.430947
Pla2r1	phospholipase A2 receptor 1	0.875728	3.62218	0.622009	0.82177	1.46259	0.715593	yes	0.0375068	1.70664	0.999984	-0.771181	-0.42953
Ptprd	protein tyrosine phosphatase, receptor type, D	0.834683	1.00522	0.953591	0.381435	0.416479	0.518302	yes	0.0144247	0.931165	0.438739	-1.08567	-0.420723
Nynrin	NYN domain and retroviral integrase containing	3.02239	1.84921	2.7197	1.5747	1.34296	2.12354	yes	0.0482462	2.53043	1.6804	-0.59058	-0.41424
Ppp1r9a	protein phosphatase 1, regulatory subunit 9A	1.43843	1.99537	1.46687	1.51769	1.05808	0.349921	yes	0.030694	1.63356	0.97523	-0.744202	-0.407588

## Sheet: Table 1c
Table 1c. Differentially expressed genes up-regulated in GNAQ-Q209L IFE melanocytes, sorted by Z_score
Gene	Name	WT_17_11	WT_11_12	WT_27_4	GQ_27_11	GQ_17_11	GQ_25_6	Significant	Q_value	WT_FPKM	GQ_FPKM	Log2(GQ/WT)	Z_score
Cst3	cystatin C	249.551	240.619	250.103	1285.09	1196.8	1081	yes	0.000658218	246.758	1187.63	2.26692	24.8426
S100a4	S100 calcium binding protein A4	93.0105	157.727	77.6005	908.768	632.726	575.454	yes	0.000658218	109.446	705.649	2.68873	20.8829
Cpe	carboxypeptidase E	83.9315	118.906	49.9261	707.118	393.269	652.632	yes	0.000658218	84.2545	584.34	2.79398	19.3403
Lgals3	lectin, galactose binding, soluble 3	810.365	731.46	661.926	1551.77	1531.69	1545.06	yes	0.000658218	734.584	1542.84	1.07059	16.9366
Grn	granulin	283.962	224.809	341.129	788.954	725.336	745.741	yes	0.000658218	283.3	753.344	1.41098	14.599
Sparc	secreted acidic cysteine rich glycoprotein	493.714	411.278	501.116	963.542	912.778	1191.62	yes	0.000658218	468.703	1022.65	1.12556	14.3442
Mcam	melanoma cell adhesion molecule	9.62463	19.0326	11.7437	187.497	150.933	187.226	yes	0.000658218	13.467	175.219	3.70166	11.7755
Psmd8	proteasome (prosome, macropain) 26S subunit, non-ATPase, 8	250.282	198.35	235.771	540.058	541.487	557.096	yes	0.000658218	228.134	546.214	1.25958	11.4306
Cd9	CD9 antigen	402.118	405.039	377.767	796.816	730.653	835.483	yes	0.000658218	394.975	787.651	0.995796	11.4185
Ppap2a	Lipid phosphate phosphohydrolase 1	19.6454	14.8589	15.562	168.937	160.339	151.61	yes	0.000658218	16.6888	160.295	3.26378	10.7946
Nr4a3	nuclear receptor subfamily 4, group A, member 3	20.1785	18.3551	15.9567	138.523	159.607	147.651	yes	0.000658218	18.1634	148.594	3.03226	10.1003
Mmp2	matrix metallopeptidase 2	2.68981	6.10436	1.76077	131.53	57.3934	146.393	yes	0.000658218	3.51831	111.772	4.98953	10.082
Pkm	pyruvate kinase, muscle	509.276	517.277	539.214	888.776	926.869	859.458	yes	0.0081231	521.922	891.701	0.772725	9.83501
Gnas	GNAS (guanine nucleotide binding protein, alpha stimulating) complex locus	632.795	482.11	598.606	1006.9	1019.38	838.447	yes	0.00608033	571.17	954.909	0.741442	9.82306
Syt4	synaptotagmin IV	401.045	342.946	345.876	644.317	641.837	747.38	yes	0.00518114	363.289	677.845	0.899837	9.74865
Fxyd5	FXYD domain-containing ion transport regulator 5	14.1692	23.5688	8.86619	167.935	95.164	128.206	yes	0.000658218	15.5347	130.435	3.06976	9.5102
Pfn1	profilin 1	719.919	683.898	830.418	1094.78	1142.15	1177.16	yes	0.00177006	744.745	1138.03	0.61172	9.06376
Gsn	gelsolin	353.309	316.274	396.202	627.184	673.232	616.417	yes	0.00122911	355.262	638.944	0.846808	8.99694
Ckb	creatine kinase, brain	17.4592	25.0419	28.0113	139.419	134.617	134.627	yes	0.000658218	23.5041	136.221	2.53496	8.91871
Anxa1	annexin A1	449.843	507.684	406.622	781.217	707.947	800.516	yes	0.000658218	454.716	763.227	0.747145	8.84008
Ctsb	cathepsin B	191.757	171.329	188.003	392.829	344.352	442.019	yes	0.000658218	183.696	393.067	1.09745	8.71799
Slc37a2	solute carrier family 37 (glycerol-3-phosphate transporter), member 2	14.9684	13.17	13.9786	85.0418	90.5264	134.883	yes	0.000658218	14.039	103.484	2.88189	8.25076
Ctsz	cathepsin Z	211.704	160.573	201.862	425.776	386.356	345.012	yes	0.000658218	191.38	385.715	1.0111	8.08961
Itgb3	integrin beta 3	5.8392	5.01644	9.25939	81.1172	62.5047	105.22	yes	0.000658218	6.70501	82.9473	3.62888	8.05221
Snca	synuclein, alpha	42.2328	27.5701	43.8167	122.803	153.163	163.267	yes	0.000658218	37.8732	146.411	1.95077	7.99534
Ephx1	epoxide hydrolase 1, microsomal	42.5931	41.4796	44.8064	129.51	149.627	187.122	yes	0.000658218	42.9597	155.42	1.85511	7.98454
Plekho1	pleckstrin homology domain containing, family O member 1	39.3658	33.825	30.6238	137.273	135.183	145.401	yes	0.000658218	34.6049	139.286	2.009	7.93833
Stc1	stanniocalcin 1	0.396142	0.747031	0.302824	41.2647	33.7972	116.567	yes	0.000658218	0.481999	63.8763	7.05011	7.9022
Ccnd1	cyclin D1	50.3622	59.9459	45.03	153.554	136.179	199.408	yes	0.000658218	51.7794	163.047	1.65484	7.59146
Capg	capping protein (actin filament), gelsolin-like	72.4171	103.716	54.2769	199.315	163.921	243.193	yes	0.000658218	76.8033	202.143	1.39614	7.50461
Tagln2	transgelin 2	447.956	448.904	364.789	663.98	638.807	689.088	yes	0.00122911	420.55	663.958	0.658817	7.39128
Slc16a3	solute carrier family 16 (monocarboxylic acid transporters), member 3	6.58418	5.15821	9.47351	61.1149	88.7353	66.3648	yes	0.000658218	7.07197	72.0717	3.34925	7.3064
S100a9	S100 calcium binding protein A9 (calgranulin B)	21.2094	82.8566	20.523	12.2979	13.516	386.511	yes	0.000658218	41.5297	137.442	1.7266	7.16937
Myl6	myosin, light polypeptide 6, alkali, smooth muscle and non-muscle	227.81	216.897	243.317	379.605	386.327	438.6	yes	0.000658218	229.341	401.511	0.807942	6.85476
Akap2	A kinase (PRKA) anchor protein 2	21.5751	20.0329	23.2316	96.9405	78.6078	110.289	yes	0.000658218	21.6132	95.2791	2.14025	6.81355
Cd109	CD109 antigen	19.669	32.6727	14.3612	105.165	84.4286	95.7587	yes	0.000658218	22.2343	95.1174	2.09692	6.72794
Cap1	CAP, adenylate cyclase-associated protein 1 (yeast)	181.472	141.517	193.464	335.313	347.659	278.601	yes	0.000658218	172.151	320.524	0.896759	6.6846
Sphk1	sphingosine kinase 1	5.6079	7.18386	4.79	52.8964	50.9176	74.9389	yes	0.000658218	5.86059	59.5843	3.34582	6.64092
Ecm1	extracellular matrix protein 1	80.0393	84.7939	63.3405	205.512	158.745	183.02	yes	0.000658218	76.0579	182.426	1.26214	6.61597
Iyd	iodotyrosine deiodinase	1.09555	1.55839	1.26012	34.6574	31.896	72.8053	yes	0.000658218	1.30469	46.4529	5.15399	6.5331
Tpm4	tropomyosin 4	240.963	227.076	227.582	383.987	390.763	410.694	yes	0.000658218	231.874	395.148	0.769054	6.52044
Ninj1	ninjurin 1	146.048	108.714	148.033	248.811	259.952	275.937	yes	0.000658218	134.265	261.567	0.962095	6.39851
Ldha	lactate dehydrogenase A	533.237	492.295	522.358	716.632	793.988	717.929	yes	0.0217648	515.963	742.85	0.525802	6.39481
Wdr1	WD repeat domain 1	165.171	147.537	208.918	312.477	301.56	329.865	yes	0.000658218	173.875	314.634	0.855621	6.36852
Eps8	epidermal growth factor receptor pathway substrate 8	19.1937	18.3713	20.8965	82.1333	68.8939	101.6	yes	0.000658218	19.4872	84.2091	2.11145	6.35579
Crip1	cysteine-rich protein 1 (intestinal)	275.696	295.78	238.043	470.422	376.114	469.506	yes	0.000658218	269.84	438.681	0.701069	6.3431
Rhoc	ras homolog family member C	112.443	89.5562	108.491	214.907	190.738	243.253	yes	0.000658218	103.497	216.299	1.06344	6.30787
Cdh13	cadherin 13	76.418	64.7426	75.1849	170.567	179.233	156.297	yes	0.000658218	72.1152	168.699	1.22608	6.22391
Igfbp5	insulin-like growth factor binding protein 5	4.20466	4.24685	8.89933	42.677	66.6302	51.2489	yes	0.000658218	5.78361	53.5187	3.21	6.19872
S100a8	S100 calcium binding protein A8 (calgranulin A)	90.8631	139.441	75.2842	43.0394	55.9523	529.133	yes	0.000658218	101.863	209.375	1.03946	6.09413
Eno3	enolase 3, beta muscle	9.05861	6.45448	8.32821	87.2848	53.1697	26.3482	yes	0.000658218	7.9471	55.6009	2.80661	5.97787
Serpine2	serine (or cysteine) peptidase inhibitor, clade E, member 2	0.759014	0.961734	0.24019	57.3896	30.8723	22.8905	yes	0.000658218	0.653646	37.0508	5.82485	5.92749
Tpm1	tropomyosin 1, alpha	99.8562	93.387	107.761	204.449	195.876	206.063	yes	0.000658218	100.335	202.129	1.01046	5.85313
Fez1	fasciculation and elongation protein zeta 1 (zygin I)	43.4951	33.1371	40.1263	108.826	116.047	104.802	yes	0.000658218	38.9195	109.892	1.49752	5.81795
S100a6	S100 calcium binding protein A6 (calcyclin)	661.963	833.935	620.324	976.601	863.479	981.746	yes	0.0378073	705.407	940.609	0.415138	5.79726
Krt6b	keratin 6B	31.0855	72.2836	23.9878	20.3272	19.6359	301.298	yes	0.000658218	42.4523	113.754	1.422	5.70492
Nr4a1	nuclear receptor subfamily 4, group A, member 1	106.815	111.836	121.059	210.043	224.821	211.822	yes	0.000658218	113.237	215.562	0.928762	5.64311
Tmsb10	thymosin, beta 10	824.602	623.062	832.423	941.393	853.432	1192.39	yes	0.0439838	760.029	995.738	0.389712	5.62527
Calm1	calmodulin 1	151.476	142.928	155.357	252.767	265.634	274.505	yes	0.000658218	149.92	264.302	0.817991	5.62004
Pam	Peptidyl-glycine alpha-amidating monooxygenase	37.0561	32.6418	35.7023	114.13	87.6892	94.895	yes	0.000658218	35.1334	98.9047	1.4932	5.50822
S1pr3	sphingosine-1-phosphate receptor 3	3.27425	4.7459	2.52692	24.1737	24.4532	70.3246	yes	0.000658218	3.51569	39.6505	3.49546	5.49989
Cd81	CD81 antigen	145.421	119.396	154.388	247.611	224.311	270.343	yes	0.000658218	139.735	247.422	0.824278	5.47291
Apod	apolipoprotein D	12.276	9.31432	13.0543	84.12	31.3937	54.822	yes	0.000658218	11.5482	56.7786	2.29768	5.47186
Anxa11	annexin A11	41.7792	39.4827	46.9812	104.378	103.731	121.074	yes	0.000658218	42.7477	109.728	1.36001	5.42432
Scd2	stearoyl-Coenzyme A desaturase 2	245.394	152.833	311.797	374.202	378.753	355.879	yes	0.0343175	236.675	369.611	0.643104	5.39891
Avpi1	arginine vasopressin-induced 1	61.9712	79.3348	55.1573	143.131	137.495	147.835	yes	0.000658218	65.4878	142.82	1.1249	5.35808
Actg1	actin, gamma, cytoplasmic 1	399.803	316.356	471.068	551.675	567.842	562.465	yes	0.0248438	395.742	560.661	0.502566	5.33272
Cav1	caveolin 1, caveolae protein	45.4221	50.1402	38.026	140.002	114.139	78.6762	yes	0.000658218	44.5294	110.939	1.31694	5.32611
Cdkn1a	cyclin-dependent kinase inhibitor 1A (P21)	107.53	106.126	126.339	196.272	209.158	221.058	yes	0.000658218	113.332	208.829	0.881773	5.32055
Parm1	prostate androgen-regulated mucin-like protein 1	5.5566	4.36232	3.68775	37.4842	35.2992	47.3383	yes	0.000658218	4.53556	40.0406	3.14211	5.31788
Rps26	ribosomal protein S26	515.915	494.573	648.615	762.189	942.227	525.61	yes	0.0207306	553.034	743.342	0.426657	5.28556
Aprt	adenine phosphoribosyl transferase	64.0972	78.7213	55.1059	154.974	152.661	115.544	yes	0.000658218	65.9748	141.06	1.09632	5.21832
Cotl1	coactosin-like 1 (Dictyostelium)	162.262	133.711	196.649	267.35	272.913	278.547	yes	0.000658218	164.207	272.937	0.733048	5.20037
Adcy7	adenylate cyclase 7	16.5456	30.8755	11.1275	92.9663	55.7805	55.4862	yes	0.000658218	19.5162	68.0777	1.80251	5.18866
Atp6v0b	ATPase, H+ transporting, lysosomal V0 subunit B	222.857	205.211	285.939	317.228	352.956	425.52	yes	0.000658218	238.002	365.235	0.617848	5.18028
Gapdh	glyceraldehyde-3-phosphate dehydrogenase	234.562	226.288	218.379	347.81	358.889	341.847	yes	0.000658218	226.41	349.515	0.62642	5.12974
Myh9	myosin, heavy polypeptide 9, non-muscle	128.823	128.405	161.498	245.183	221.573	251.304	yes	0.00280352	139.575	239.353	0.778098	5.12573
Cdh19	cadherin 19, type 2	16.2422	13.8429	12.426	66.3298	52.3092	52.2847	yes	0.000658218	14.1704	56.9746	2.00744	5.07475
Galnt18	polypeptide N-acetylgalactosaminyltransferase 18	2.65202	4.41629	2.17951	34.0533	30.174	35.9874	yes	0.000658218	3.08261	33.4049	3.43784	5.01984
Anxa5	annexin A5	234.86	238.571	266.983	358.177	350.308	404.69	yes	0.00177006	246.805	371.058	0.588276	4.99877
Cyp4b1	cytochrome P450, family 4, subfamily b, polypeptide 1	22.4968	25.602	15.3466	68.6671	71.8281	64.6308	yes	0.000658218	21.1485	68.3753	1.69292	4.99137
Myadm	myeloid-associated differentiation marker	137.07	116.564	154.008	221.428	217.215	246.952	yes	0.000658218	135.881	228.532	0.750054	4.85348
Calu	calumenin	161.624	153.905	147.783	247.589	225.134	282.463	yes	0.000658218	154.437	251.729	0.704848	4.8275
Fam129a	family with sequence similarity 129, member A	51.8526	40.7527	63.8825	99.2054	112.313	131.708	yes	0.000658218	52.1626	114.409	1.13311	4.82295
Cspg4	chondroitin sulfate proteoglycan 4	27.4178	27.2106	23.9666	80.4808	67.6721	75.6697	yes	0.000658218	26.1983	74.6075	1.50985	4.82153
Rhob	ras homolog family member B	142.203	92.2809	188.84	236.063	228.46	238.567	yes	0.000658218	141.108	234.363	0.731947	4.81266
Map1a	microtubule-associated protein 1 A	1.51694	1.54889	1.81025	31.5778	23.2932	24.2924	yes	0.000658218	1.62536	26.3878	4.02104	4.67856
Cstb	cystatin B	345.342	307.677	316.286	443.981	472.041	443.559	yes	0.00280352	323.102	453.194	0.48814	4.66914
Col5a2	collagen, type V, alpha 2	6.32632	7.7436	6.24031	44.295	32.0958	35.5675	yes	0.000658218	6.77008	37.3194	2.46268	4.60081
Speg	SPEG complex locus	10.78	7.51288	10.3637	39.4145	34.9023	53.5924	yes	0.000658218	9.55219	42.6364	2.15818	4.57966
Hhipl1	hedgehog interacting protein-like 1	10.5452	8.17381	7.83055	34.4697	37.3451	49.5412	yes	0.000658218	8.84985	40.452	2.19249	4.50075
Fam178b	family with sequence similarity 178, member B	43.7366	35.714	37.7712	60.8112	109.059	100.443	yes	0.000658218	39.0739	90.1044	1.20539	4.48988
Atp6v1h	ATPase, H+ transporting, lysosomal V1 subunit H	56.1769	50.2962	56.4292	112.487	105.857	118.378	yes	0.000658218	54.3008	112.241	1.04755	4.48969
Clic1	chloride intracellular channel 1	99.1583	104.091	89.6394	177.748	155.852	180.132	yes	0.000658218	97.6296	171.244	0.810663	4.48941
Serpinb6a	serine (or cysteine) peptidase inhibitor, clade B, member 6a	100.128	93.0112	74.459	164.251	150.298	165.647	yes	0.000658218	89.1994	160.065	0.843555	4.48856
Rnase4	ribonuclease, RNase A family 4	69.6735	54.5224	57.7978	158.584	115.976	87.2516	yes	0.000658218	60.6646	120.604	0.99135	4.45195
Esam	endothelial cell-specific adhesion molecule	0.102233	0.374825	0.10766	12.1693	13.5197	34.361	yes	0.000658218	0.194906	20.0167	6.68228	4.40902
Tgfb1i1	transforming growth factor beta 1 induced transcript 1	5.23498	3.42628	5.4652	30.1485	30.1916	32.9186	yes	0.000658218	4.70882	31.0862	2.72284	4.4088
Ntm	neurotrimin	0.14024	0.819091	0.387503	15.5846	18.6381	27.5014	yes	0.000658218	0.448945	20.5747	5.51819	4.38933
Itgb1	integrin beta 1 (fibronectin receptor beta)	164.789	178.223	176.831	265.873	249.901	278.576	yes	0.006476	173.281	264.783	0.611699	4.37183
Lpcat2	lysophosphatidylcholine acyltransferase 2	3.11327	10.1353	2.47264	53.6255	18.3862	23.6025	yes	0.000658218	5.2404	31.8714	2.60451	4.37151
Arhgef2	rho/rac guanine nucleotide exchange factor (GEF) 2	7.93231	8.3016	9.21161	42.0631	36.5535	35.6879	yes	0.000658218	8.48184	38.1015	2.1674	4.33975
Stx4a	syntaxin 4A (placental)	93.0205	80.0168	89.1965	143.871	164.408	154.523	yes	0.000658218	87.4113	154.267	0.819541	4.30053
Litaf	LPS-induced TN factor	62.2538	61.0047	80.8056	124.465	115.07	142.578	yes	0.000658218	68.0214	127.371	0.904977	4.24585
Pdlim7	PDZ and LIM domain 7	10.6604	9.15504	12.261	46.9573	39.7138	37.0492	yes	0.000658218	10.6921	41.2401	1.9475	4.239
Car6	carbonic anhydrase 6	23.8441	30.454	25.2042	82.9927	50.651	68.5079	yes	0.000658218	26.5008	67.3839	1.34637	4.21936
Galnt6	polypeptide N-acetylgalactosaminyltransferase 6	2.2947	3.36203	2.41164	20.3918	18.5595	34.9959	yes	0.000658218	2.68946	24.6491	3.19615	4.19988
C1ql3	C1q-like 3	1.53578	1.81139	1.77905	15.0302	19.067	32.3169	yes	0.000658218	1.70874	22.138	3.69552	4.18349
Tnfrsf12a	tumor necrosis factor receptor superfamily, member 12a	47.5668	68.9189	42.2124	115.078	90.2546	111.325	yes	0.00122911	52.8994	105.553	0.996639	4.18288
Pdgfa	platelet derived growth factor, alpha	7.70715	7.13852	7.34257	36.1479	32.1591	34.7653	yes	0.000658218	7.39608	34.3574	2.21579	4.17249
Snx1	sorting nexin 1	110.021	94.7477	119.852	185.007	165.111	184.988	yes	0.000658218	108.207	178.369	0.72107	4.14458
Bok	BCL2-related ovarian killer	25.8692	31.7367	23.7126	68.7448	68.2789	64.418	yes	0.000658218	27.1062	67.1472	1.30871	4.12437
Vcl	vinculin	38.1959	38.4024	51.0802	89.0556	82.7224	97.5981	yes	0.000658218	42.5595	89.792	1.07711	4.1056
Sema3c	sema domain, immunoglobulin domain (Ig), short basic domain, secreted, (semaphorin) 3C	17.4586	20.7304	13.0804	46.789	47.0543	57.7025	yes	0.000658218	17.0898	50.5153	1.56358	4.06526
Angptl2	angiopoietin-like 2	160.808	141.624	148.257	235.483	216.289	234.361	yes	0.00177006	150.23	228.711	0.606356	4.03163
Inpp5a	inositol polyphosphate-5-phosphatase A	31.0371	27.2052	34.752	72.247	70.3254	72.9531	yes	0.000658218	30.9981	71.8418	1.21264	4.02758
Tppp3	tubulin polymerization-promoting protein family member 3	97.2469	112.093	79.3317	177.723	189.409	114.684	yes	0.000658218	96.2239	160.605	0.739053	4.01734
Prrx1	paired related homeobox 1	0.0143974	0.998178	0.0572056	24.1052	12.2141	15.1169	yes	0.000658218	0.356594	17.1454	5.5874	4.01306
Sema4f	sema domain, immunoglobulin domain (Ig), TM domain, and short cytoplasmic domain	0.606592	1.27699	0.717071	14.1461	16.1997	24.1044	yes	0.000658218	0.866884	18.1501	4.38799	3.96327
Gm14005	predicted gene 14005	19.0768	24.0231	13.6456	55.6465	47.1598	52.2094	yes	0.000658218	18.9152	51.6719	1.44984	3.89886
Hist1h1c	histone cluster 1, H1c	83.3592	69.301	77.3846	139.277	147.589	112.537	yes	0.000658218	76.6816	133.134	0.79593	3.89732
Slc4a8	solute carrier family 4 (anion exchanger), member 8	7.60892	7.32585	7.76297	32.0747	33.018	31.0608	yes	0.000658218	7.56591	32.0512	2.08279	3.89012
Steap3	STEAP family member 3	66.4698	55.3362	76.1079	94.6632	118.415	143.08	yes	0.000658218	65.9713	118.719	0.847645	3.88136
Arpc3	actin related protein 2/3 complex, subunit 3	217.096	188.638	209.864	284.222	276.124	314.597	yes	0.00122911	205.199	291.648	0.5072	3.87833
Hspa8	heat shock protein 8	191.818	201.735	239.153	342.584	324.827	224.98	yes	0.00978581	210.902	297.464	0.496141	3.83917
Klhl30	kelch-like 30	1.37489	1.37883	1.9322	21.6513	20.3424	14.7427	yes	0.000658218	1.56197	18.9121	3.59787	3.83443
Gm16062	predicted gene 16062	4.16572	2.22775	5.32422	21.9472	22.7592	27.5045	yes	0.0336727	3.9059	24.0703	2.62353	3.81233
Vasp	vasodilator-stimulated phosphoprotein	46.1863	45.2329	50.8318	97.1325	92.5884	87.5282	yes	0.000658218	47.417	92.4164	0.962744	3.80541
Pla2g2e	phospholipase A2, group IIE	174.035	93.3058	215.132	218.914	247.133	243.666	yes	0.000658218	160.824	236.571	0.556788	3.79973
Trf	transferrin	92.9568	82.194	80.8666	131.361	134.974	161.826	yes	0.000658218	85.3391	142.72	0.741912	3.79967
Slc24a4	solute carrier family 24 (sodium/potassium/calcium exchanger), member 4	146.583	140.312	119.129	182.909	200.777	228.517	yes	0.000658218	135.341	204.068	0.592445	3.73045
Adam12	a disintegrin and metallopeptidase domain 12 (meltrin alpha)	0.0374844	0.146101	0.107858	16.7968	12.5161	13.2871	yes	0.000658218	0.0971478	14.2	7.19149	3.72977
Actr3	ARP3 actin-related protein 3	94.1809	76.3797	80.9821	140.519	138.059	140.052	yes	0.000658218	83.8476	139.543	0.734872	3.7264
Nfil3	nuclear factor, interleukin 3, regulated	8.83331	7.26989	7.30805	27.1725	32.6054	32.9157	yes	0.000658218	7.80375	30.8979	1.98527	3.71225
Aqp1	aquaporin 1	0.219594	0.182173	0.279008	21.8385	11.9726	9.28933	yes	0.000658218	0.226925	14.3668	5.98438	3.70137
Trpv2	transient receptor potential cation channel, subfamily V, member 2	20.3404	9.20153	25.8289	46.373	47.8949	52.1163	yes	0.000658218	18.4569	48.7947	1.40256	3.69941
Rpa1	replication protein A1	46.3918	42.1476	49.442	87.2593	89.3628	87.9927	yes	0.000658218	45.9938	88.2049	0.93942	3.64379
Emp1	epithelial membrane protein 1	155.799	188.029	122.233	247.55	210.246	221.736	yes	0.00326971	155.354	226.511	0.544023	3.64136
Eno1b	enolase 1B, retrotransposed	114.229	117.34	119.193	177.18	169.886	191.808	yes	0.0166145	116.921	179.625	0.619456	3.64124
Bcl2l1	BCL2-like 1	15.6902	19.8125	15.098	43.5944	37.4212	55.8664	yes	0.000658218	16.8669	45.6273	1.4357	3.63811
Slc6a6	solute carrier family 6 (neurotransmitter transporter, taurine), member 6	52.2772	58.3504	50.0442	103.512	92.9786	98.2906	yes	0.000658218	53.5573	98.2604	0.875528	3.62808
Tpi1	triosephosphate isomerase 1	248.482	240.416	252.702	309.782	351.318	342.465	yes	0.0287716	247.2	334.522	0.436421	3.62047
Cav2	caveolin 2	68.0094	61.1033	57.203	116.135	112.717	99.2289	yes	0.000658218	62.1052	109.36	0.816302	3.60878
Hsd3b7	hydroxy-delta-5-steroid dehydrogenase, 3 beta- and steroid delta-isomerase 7	17.4015	18.5479	20.0485	50.3413	45.4002	48.4073	yes	0.000658218	18.666	48.0496	1.36411	3.59743
Timp3	tissue inhibitor of metalloproteinase 3	32.163	24.6021	35.2439	69.9913	58.7214	68.7989	yes	0.000658218	30.6697	65.8372	1.10209	3.57983
Arhgap1	Rho GTPase activating protein 1	47.5737	41.8489	52.9662	94.377	92.5665	80.1569	yes	0.000658218	47.4629	89.0335	0.907546	3.55816
Ybx1	Y box protein 1	249.715	223.502	252.459	315.505	312.203	350.515	yes	0.0448614	241.892	326.074	0.430838	3.53232
Hexa	hexosaminidase A	128.565	92.208	158.078	162.127	173.043	231.314	yes	0.000658218	126.284	188.828	0.580405	3.52335
Ttc39c	tetratricopeptide repeat domain 39C	1.64796	2.7721	1.26561	14.0107	16.3811	21.5864	yes	0.000658218	1.89522	17.3261	3.1925	3.51964
Man1a	mannosidase 1, alpha	4.68667	4.60094	5.64795	23.4662	23.6318	24.484	yes	0.000658218	4.97852	23.8607	2.26085	3.51609
Sema3g	sema domain, immunoglobulin domain (Ig), short basic domain, secreted, (semaphorin) 3G	2.5447	3.01446	2.33382	17.7011	14.6306	24.3081	yes	0.000658218	2.63099	18.8799	2.84317	3.50345
Hspg2	perlecan (heparan sulfate proteoglycan 2)	30.5683	27.3602	44.914	68.2208	62.3796	78.7769	yes	0.000658218	34.2808	69.7924	1.02567	3.48097
Dstn	destrin	154.473	170.391	133.057	213.514	230.873	214.529	yes	0.00122911	152.64	219.639	0.524996	3.4724
Prelid2	PRELI domain containing 2	9.51102	10.6033	9.18983	30.4648	32.7388	33.2612	yes	0.000658218	9.76805	32.1549	1.7189	3.45754
Gpr137b	G protein-coupled receptor 137B	96.7291	64.8706	118.257	151.994	143.98	144.13	yes	0.000658218	93.2856	146.701	0.653156	3.44807
Ddit3	DNA-damage inducible transcript 3	30.2342	24.4896	30.3032	62.3477	53.728	66.6746	yes	0.0137049	28.3423	60.9168	1.10388	3.44787
Pgf	placental growth factor	0.812468	1.01521	0.830307	20.119	11.0624	11.6415	yes	0.000658218	0.885995	14.2743	4.00998	3.43852
Chchd10	coiled-coil-helix-coiled-coil-helix domain containing 10	68.8158	75.2759	78.6462	126.114	119.622	121.549	yes	0.000658218	74.246	122.428	0.721553	3.43569
Ctsa	cathepsin A	134.285	100.274	132.857	173.094	177.719	196.028	yes	0.00608033	122.472	182.28	0.573707	3.42601
Tubb3	tubulin, beta 3 class III	21.3307	17.7454	26.1141	50.67	46.3437	55.7687	yes	0.000658218	21.7301	50.9275	1.22875	3.42534
Penk	preproenkephalin	0.186528	0.446207	0.0732516	21.5867	7.59649	8.03703	yes	0.00326971	0.235329	12.4067	5.7203	3.4232
Mef2c	myocyte enhancer factor 2C	6.24624	7.20075	5.53443	26.1915	29.3438	21.2668	yes	0.000658218	6.32714	25.6007	2.01656	3.41096
Asb2	ankyrin repeat and SOCS box-containing 2	0.474175	0.34332	1.54161	15.9255	13.6175	11.5697	yes	0.000658218	0.786368	13.7042	4.12327	3.3935
Arpc2	actin related protein 2/3 complex, subunit 2	234.009	211.078	212.179	304.355	294.764	288.929	yes	0.0207306	219.089	296.016	0.43416	3.38948
Mrps6	mitochondrial ribosomal protein S6	44.6972	35.1986	59.0352	82.2143	77.7804	94.4362	yes	0.000658218	46.3103	84.8103	0.872905	3.36221
Scpep1	serine carboxypeptidase 1	224.689	152.66	235.822	245.745	251.778	336.125	yes	0.0268012	204.39	277.883	0.443149	3.34654
Slc11a2	solute carrier family 11 (proton-coupled divalent metal ion transporters), member 2	8.70053	10.0307	10.191	34.4146	28.0115	30.381	yes	0.000658218	9.64074	30.9357	1.68206	3.34303
Megf10	multiple EGF-like-domains 10	27.783	32.4644	25.4871	65.9282	54.2698	59.325	yes	0.000658218	28.5782	59.841	1.06622	3.32472
Stfa1	stefin A1	65.2865	122.347	36.7794	47.2339	58.3941	255.132	yes	0.00936199	74.8043	120.253	0.684884	3.25419
Nav1	neuron navigator 1	21.5906	17.3192	17.6766	54.5798	38.023	41.6532	yes	0.000658218	18.8621	44.752	1.24646	3.24603
Dclk1	doublecortin-like kinase 1	30.3327	31.9841	32.9879	55.1281	59.5323	75.5396	yes	0.000658218	31.7682	63.4	0.996898	3.24248
Etv5	ets variant 5	15.1424	12.832	13.6025	39.7634	35.3301	35.7534	yes	0.000658218	13.859	36.949	1.41471	3.23935
Tubb6	tubulin, beta 6 class V	16.5092	25.5821	18.7883	45.2453	42.2515	52.9416	yes	0.000658218	20.2932	46.8128	1.20591	3.23732
Dpysl3	dihydropyrimidinase-like 3	22.9003	22.5996	23.6353	48.8427	47.0735	56.3546	yes	0.000658218	23.0451	50.7569	1.13915	3.22576
Prl2c5	prolactin family 2, subfamily c, member 5	5.45809	4.76865	12.919	40.2226	13.9908	25.2505	yes	0.000658218	7.71525	26.488	1.77955	3.20992
Atp2b4	ATPase, Ca++ transporting, plasma membrane 4	20.2886	18.9588	21.9637	52.6193	44.8765	42.1872	yes	0.000658218	20.4037	46.561	1.19029	3.19646
Sec11c	SEC11 homolog C, signal peptidase complex subunit	188.074	133.811	167.142	216.605	195.516	265.745	yes	0.00896147	163.009	225.955	0.471086	3.19165
Klf4	Kruppel-like factor 4 (gut)	105.918	125.022	92.4061	160.913	153.242	165.823	yes	0.00122911	107.782	159.993	0.569889	3.19061
Gadd45g	growth arrest and DNA-damage-inducible 45 gamma	22.6945	17.3081	19.6946	50.9085	42.7426	43.2951	yes	0.000658218	19.8991	45.6487	1.19787	3.18048
9330188P03Rik	RIKEN cDNA 9330188P03 gene	2.18704	2.18048	3.50904	14.8473	13.5349	21.0098	yes	0.000658218	2.62552	16.464	2.64864	3.16731
Arid5a	AT rich interactive domain 5A (MRF1-like)	13.2794	11.8925	13.4963	33.761	36.9882	33.4446	yes	0.000658218	12.8894	34.7313	1.43005	3.16513
Slc25a39	solute carrier family 25, member 39	99.9139	96.3032	95.4335	142.6	160.668	136.532	yes	0.000658218	97.2169	146.6	0.592607	3.16262
Sptbn1	spectrin beta, non-erythrocytic 1	105.547	96.9866	110.646	156.685	143.91	165.185	yes	0.0180095	104.393	155.26	0.572658	3.15673
Cdk18	cyclin-dependent kinase 18	0.473835	0.601171	0.439422	10.4805	10.437	12.8696	yes	0.000658218	0.504809	11.2624	4.47963	3.13601
Col4a2	collagen, type IV, alpha 2	0.432182	0.914292	0.503417	17.0372	6.72307	10.6995	yes	0.000658218	0.61663	11.4866	4.2194	3.12448
Bin3	bridging integrator 3	84.248	85.3522	72.0205	121.602	127.723	126.353	yes	0.000658218	80.5402	125.226	0.636753	3.11517
Npnt	nephronectin	64.0702	47.6845	68.1069	98.0255	89.8583	109.691	yes	0.000658218	59.9539	99.1916	0.726365	3.11033
Gnb4	guanine nucleotide binding protein (G protein), beta 4	47.2478	34.1554	59.3574	78.6	78.0437	90.1555	yes	0.000658218	46.9202	82.2664	0.810094	3.10981
Sprr2d	small proline-rich protein 2D	6.80294	16.576	7.08354	4.70466	5.05134	79.6323	yes	0.000658218	10.1542	29.7961	1.55305	3.1076
Adgra2	adhesion G protein-coupled receptor A2	50.4512	46.1556	51.2933	89.767	78.156	87.5497	yes	0.000658218	49.3	85.1576	0.788546	3.09234
Atf5	activating transcription factor 5	16.7461	24.1376	15.4783	36.5641	40.7315	52.0085	yes	0.00280352	18.7873	43.1014	1.19797	3.09066
Slc6a17	solute carrier family 6 (neurotransmitter transporter), member 17	88.4112	88.9126	99.6091	123.66	134.46	159.292	yes	0.00375207	92.311	139.137	0.591936	3.07796
Tln1	talin 1	72.3021	68.8672	90.9597	121.666	110.027	129.71	yes	0.00375207	77.3763	120.468	0.638682	3.06357
Antxr2	anthrax toxin receptor 2	12.3949	12.408	11.4059	35.6233	33.661	28.0648	yes	0.000658218	12.0696	32.4497	1.42683	3.05444
Hdac5	histone deacetylase 5	15.1312	11.8505	17.5156	38.4452	35.2806	36.2393	yes	0.000658218	14.8324	36.655	1.30526	3.04128
Cercam	cerebral endothelial cell adhesion molecule	2.23542	1.60692	1.41987	12.7842	11.0374	16.5949	yes	0.000658218	1.75407	13.4722	2.9412	3.00304
Rgs2	regulator of G-protein signaling 2	0.74016	1.13505	0.667776	13.3314	10.0732	10.2552	yes	0.000658218	0.847662	11.2199	3.72643	2.98582
Ppm1b	protein phosphatase 1B, magnesium dependent, beta isoform	30.3929	25.4202	30.4883	48.9636	63.7864	55.7325	yes	0.000658218	28.7671	56.1608	0.965143	2.97252
Pacsin2	protein kinase C and casein kinase substrate in neurons 2	33.1431	27.3211	31.2048	58.5363	56.4859	60.7873	yes	0.000658218	30.5563	58.6032	0.939507	2.9703
Trim47	tripartite motif-containing 47	10.7342	12.1487	10.1533	37.7271	29.2138	23.1835	yes	0.000658218	11.0121	30.0415	1.44787	2.96995
Htatip2	HIV-1 Tat interactive protein 2	24.8476	23.0968	25.4496	48.3571	47.2026	54.7143	yes	0.000658218	24.4647	50.0913	1.03386	2.96791
Arpc1b	actin related protein 2/3 complex, subunit 1B	192.737	175.652	190.717	243.672	245.672	253.806	yes	0.0214453	186.369	247.717	0.410532	2.94451
Trib2	tribbles pseudokinase 2	5.43224	10.3438	4.76539	23.635	20.5268	24.4471	yes	0.000658218	6.84714	22.8696	1.73986	2.9392
Ipo13	importin 13	26.4343	24.5806	28.7865	41.6338	50.5152	66.179	yes	0.000658218	26.6005	52.776	0.98843	2.93799
Sncg	synuclein, gamma	3.98266	7.15613	2.96344	20.1542	16.1116	20.5876	yes	0.000658218	4.70074	18.9511	2.01132	2.93018
Map7d1	MAP7 domain containing 1	52.2326	46.5762	54.4255	84.4286	77.6518	93.0728	yes	0.000658218	51.0781	85.0511	0.735624	2.91178
Hmga2	high mobility group AT-hook 2	0.112918	0.293807	0.202465	12.2574	4.51413	10.2945	yes	0.000658218	0.203063	9.02201	5.47345	2.90357
1810011O10Rik	transcriptional and immune response regulator	18.503	31.3281	11.3735	45.5999	36.5274	48.7143	yes	0.000658218	20.4015	43.6139	1.09611	2.90119
Lcp1	lymphocyte cytosolic protein 1	2.02538	2.06242	2.09159	16.0384	18.3238	6.02701	yes	0.000658218	2.0598	13.4631	2.70843	2.8943
Igf2bp2	insulin-like growth factor 2 mRNA binding protein 2	1.48717	1.07347	1.18457	14.2092	8.58559	12.101	yes	0.000658218	1.2484	11.6319	3.21993	2.89322
Abca1	ATP-binding cassette, sub-family A (ABC1), member 1	2.72282	6.62528	2.59245	17.1875	15.0712	19.6339	yes	0.000658218	3.98018	17.2975	2.11966	2.88706
Cspg5	chondroitin sulfate proteoglycan 5	0.797513	0.520439	0.89661	9.45957	9.78971	11.6634	yes	0.000658218	0.738187	10.3042	3.80311	2.87872
Fhl2	four and a half LIM domains 2	3.30619	7.24878	3.64401	20.5597	17.0987	18.2929	yes	0.000658218	4.73299	18.6504	1.97838	2.8781
Thbs2	thrombospondin 2	0.480129	2.071	0.76672	16.9994	4.7025	11.8931	yes	0.000658218	1.10595	11.1983	3.33993	2.87717
Rassf1	Ras association (RalGDS/AF-6) domain family member 1	74.949	69.3412	83.6933	108.638	120.774	117.122	yes	0.000658218	75.9945	115.511	0.604067	2.85556
Lims2	LIM and senescent cell antigen like domains 2	3.26032	2.02921	2.8098	15.1004	15.1004	13.412	yes	0.000658218	2.69978	14.5376	2.42888	2.85126
Ifrd1	interferon-related developmental regulator 1	52.781	50.8701	44.2338	69.382	78.0447	98.0501	yes	0.000658218	49.295	81.8256	0.731112	2.84091
Myo1c	myosin IC	46.3288	45.191	49.8458	83.4746	78.1609	75.4545	yes	0.000658218	47.1219	79.03	0.746004	2.84089
Tubb2a	tubulin, beta 2A class IIA	41.0939	49.622	54.1061	71.7474	78.5706	91.1963	yes	0.000658218	48.274	80.5048	0.737828	2.8402
Sparcl1	SPARC-like 1	11.464	11.9229	11.3051	27.1767	25.6907	36.6144	yes	0.000658218	11.564	29.8273	1.36699	2.83873
Klf2	Kruppel-like factor 2 (lung)	18.6635	10.7877	18.3435	40.3476	40.2528	28.7976	yes	0.000658218	15.9316	36.466	1.19466	2.83679
Fermt2	fermitin family member 2	77.5497	61.9441	73.7037	113.238	115.287	98.8849	yes	0.000658218	71.0658	109.137	0.618907	2.83604
Vat1l	vesicle amine transport protein 1 like	0.747533	0.58575	1.03503	3.64924	7.93194	18.9143	yes	0.000658218	0.789438	10.1652	3.68666	2.83274
Emb	embigin	3.73793	6.22393	1.95318	21.9681	14.1495	14.4318	yes	0.000658218	3.97168	16.8498	2.08491	2.82226
Ywhah	tyrosine 3-monooxygenase/tryptophan 5-monooxygenase activation protein, eta polypeptide	75.3529	67.1067	95.1401	114.3	122.246	119.84	yes	0.00280352	79.1999	118.795	0.584908	2.81396
Ano3	anoctamin 3	3.04095	3.19839	3.31963	15.101	16.3748	14.2963	yes	0.000658218	3.18632	15.2574	2.25954	2.81074
Actn1	actinin, alpha 1	23.7955	26.2635	26.4764	51.9976	54.8336	42.7248	yes	0.000658218	25.5118	49.852	0.966487	2.80377
Mlip	muscular LMNA-interacting protein	0.16589	0.301153	0.0865306	4.28647	4.40734	16.2212	yes	0.0187083	0.184525	8.305	5.4921	2.78702
Nedd4l	neural precursor cell expressed, developmentally down-regulated gene 4-like	17.0781	14.7801	12.5673	32.7083	31.2512	38.8242	yes	0.000658218	14.8085	34.2612	1.21015	2.77699
Lasp1	LIM and SH3 protein 1	46.2759	39.3049	55.7053	83.8616	67.6055	83.0016	yes	0.000658218	47.0954	78.1562	0.730776	2.77538
Tgfbr2	transforming growth factor, beta receptor II	18.6177	20.5928	19.9213	39.8944	38.2448	45.6501	yes	0.000658218	19.7106	41.2631	1.06588	2.76011
Ndnf	neuron-derived neurotrophic factor	3.71584	3.07538	1.67621	12.4402	12.3136	17.8644	yes	0.000658218	2.82248	14.2061	2.33147	2.75861
Adamts1	a disintegrin-like and metallopeptidase (reprolysin type) with thrombospondin type 1 motif, 1	33.6324	31.7502	27.7158	64.0246	45.9298	60.6935	yes	0.000658218	31.0328	56.8826	0.874194	2.75693
Plekhm1	pleckstrin homology domain containing, family M (with RUN domain) member 1	12.2462	9.53587	13.4216	32.1696	30.0442	25.8711	yes	0.000658218	11.7346	29.3616	1.32317	2.74966
Nostrin	nitric oxide synthase trafficker	21.5052	18.0793	18.5562	39.7021	42.1168	40.2346	yes	0.000658218	19.3802	40.6845	1.06989	2.74889
Cmtm4	CKLF-like MARVEL transmembrane domain containing 4	15.4679	14.5204	17.9119	32.3333	31.1039	43.7221	yes	0.000658218	15.9667	35.7198	1.16165	2.74755
Plk2	polo like kinase 2	15.6684	21.9663	15.4137	35.6062	33.799	45.1619	yes	0.000658218	17.6828	38.189	1.11081	2.7434
Anxa7	annexin A7	59.3771	62.8517	58.0892	92.3225	95.7747	94.1356	yes	0.000658218	60.106	94.0776	0.646342	2.73588
Sec11a	SEC11 homolog A, signal peptidase complex subunit	96.334	79.919	95.9331	133.492	131.967	128.596	yes	0.000658218	90.7287	131.352	0.533804	2.72594
Ostc	oligosaccharyltransferase complex subunit (non-catalytic)	55.8311	50.7607	54.2488	81.8089	84.8169	90.5323	yes	0.000658218	53.6135	85.7194	0.677024	2.71993
Ehd3	EH-domain containing 3	3.3285	1.9133	2.7663	16.8195	12.733	11.3987	yes	0.000658218	2.66937	13.6504	2.35437	2.71823
Plb1	phospholipase B1	0.508102	0.129683	0.317244	9.11105	7.82949	7.83097	yes	0.000658218	0.318343	8.25717	4.69699	2.71098
Plcb4	phospholipase C, beta 4	25.6764	20.9091	19.1251	46.2079	48.7784	36.4451	yes	0.000658218	21.9035	43.8105	1.00011	2.70242
Sfxn3	sideroflexin 3	20.844	19.9381	23.7661	42.2864	44.055	43.3547	yes	0.000658218	21.5161	43.232	1.00669	2.69877
Dusp1	dual specificity phosphatase 1	59.1893	86.9632	39.1663	82.6476	93.5775	110.518	yes	0.000658218	61.7729	95.581	0.62975	2.69514
Fads2	fatty acid desaturase 2	13.3849	6.26621	9.84964	27.7216	28.6045	21.4243	yes	0.000658218	9.83358	25.9168	1.3981	2.68988
Cdc42ep5	CDC42 effector protein (Rho GTPase binding) 5	16.8246	15.7907	13.784	27.9158	30.6058	44.7687	yes	0.000658218	15.4664	34.4301	1.15453	2.68465
Kcnn4	potassium intermediate/small conductance calcium-activated channel, subfamily N, member 4	7.69132	16.3294	10.2699	38.4314	20.4071	26.1307	yes	0.000658218	11.4302	28.3231	1.30913	2.67927
Gch1	GTP cyclohydrolase 1	5.52509	7.24529	6.47688	17.0964	18.4815	25.1479	yes	0.000658218	6.41575	20.2419	1.65766	2.67788
Selm	selenoprotein M	16.6206	10.2525	17.8148	33.2201	21.8073	45.5428	yes	0.000658218	14.896	33.5234	1.17025	2.67697
Uchl1	ubiquitin carboxy-terminal hydrolase L1	1.7357	1.70773	1.21512	9.9733	12.8091	10.3733	yes	0.000658218	1.55285	11.0519	2.8313	2.67555
Zfp36	zinc finger protein 36	127.801	135.514	111.969	167.64	172.559	173.014	yes	0.010183	125.095	171.071	0.451575	2.67157
Glud1	glutamate dehydrogenase 1	112.72	97.2697	112.238	149.336	160.474	140.897	yes	0.00978581	107.409	150.236	0.484109	2.66809
Soga3	SOGA family member 3	4.04573	2.32795	4.89387	14.9255	15.7138	15.5275	yes	0.000658218	3.75585	15.3889	2.03468	2.6587
Zyx	zyxin	52.104	37.6243	59.8263	83.2987	82.9036	74.0405	yes	0.000658218	49.8515	80.0809	0.683821	2.65198
Sfrp4	secreted frizzled-related protein 4	3.83656	4.176	2.22765	10.9616	12.8608	20.0844	yes	0.000658218	3.4134	14.6356	2.1002	2.6415
Slc22a17	solute carrier family 22 (organic cation transporter), member 17	18.6244	15.0149	18.867	31.566	35.7571	43.2587	yes	0.000658218	17.5021	36.8606	1.07455	2.62556
Diras1	DIRAS family, GTP-binding RAS-like 1	1.48765	1.02907	1.44471	10.8075	9.9646	9.9455	yes	0.000658218	1.32048	10.2392	2.95497	2.62319
Amz1	archaelysin family metallopeptidase 1	0.135753	0.28146	0.107769	8.03011	6.73728	7.38611	yes	0.000658218	0.174994	7.3845	5.39912	2.62216
Hrct1	histidine rich carboxyl terminus 1	0.159675	0.429971	0.494377	10.6256	7.61499	5.37894	yes	0.00122911	0.361341	7.87318	4.44551	2.61774
Eno2	enolase 2, gamma neuronal	6.69906	4.53413	5.43381	16.0624	16.5956	21.995	yes	0.000658218	5.55567	18.2177	1.71331	2.59691
Fkbp3	FK506 binding protein 3	61.0044	56.7316	57.8864	106.511	101.587	62.0919	yes	0.0439838	58.5408	90.0633	0.621497	2.58586
Enho	energy homeostasis associated	60.4476	54.8003	73.225	94.0251	76.728	115.093	yes	0.000658218	62.8243	95.282	0.600882	2.58133
Acot7	acyl-CoA thioesterase 7	29.2003	32.7311	31.616	58.1727	57.8	49.1989	yes	0.000658218	31.1825	55.0572	0.820196	2.5709
Fam174b	family with sequence similarity 174, member B	77.576	53.7844	92.6539	99.1242	142.856	86.3719	yes	0.00229676	74.6714	109.451	0.551653	2.56311
Apold1	apolipoprotein L domain containing 1	17.6306	13.572	27.2368	35.2864	32.0307	49.8069	yes	0.000658218	19.4798	39.0413	1.00302	2.55709
Mocos	molybdenum cofactor sulfurase	19.4744	14.8889	22.1263	41.284	33.3493	39.6618	yes	0.000658218	18.8299	38.0984	1.01671	2.55378
Ppp1cb	protein phosphatase 1 catalytic subunit beta	53.8666	59.9279	58.9827	82.4817	94.0412	88.6352	yes	0.000658218	57.5924	88.386	0.61794	2.54869
Mgarp	mitochondria localized glutamic acid rich protein	11.9023	5.05106	12.0931	14.4437	37.0555	22.2326	yes	0.000658218	9.68215	24.5773	1.34392	2.5448
Sigmar1	sigma non-opioid intracellular receptor 1	38.3286	37.1191	35.5812	65.4199	68.2711	53.3528	yes	0.000658218	37.0096	62.3479	0.752441	2.54201
Itga5	integrin alpha 5 (fibronectin receptor alpha)	17.2363	16.6736	20.5236	38.3254	34.482	38.2561	yes	0.000658218	18.1445	37.0212	1.02882	2.5415
Epas1	endothelial PAS domain protein 1	3.55946	2.91977	5.02112	10.5367	13.1926	20.6113	yes	0.000658218	3.83345	14.7802	1.94695	2.53729
Runx2	runt related transcription factor 2	3.43892	4.4893	2.66733	11.0078	14.0735	17.5486	yes	0.000658218	3.53185	14.21	2.00841	2.5351
1700025G04Rik	RIKEN cDNA 1700025G04 gene	8.92999	7.11452	8.03862	22.9703	21.3699	21.3335	yes	0.000658218	8.02771	21.8912	1.44729	2.53455
Ttll7	tubulin tyrosine ligase-like family, member 7	3.38782	3.11413	3.12806	14.0047	16.85	9.76247	yes	0.000658218	3.21	13.5391	2.07648	2.52386
Lrrfip1	leucine rich repeat (in FLII) interacting protein 1	95.6269	87.1753	87.6242	133.752	123.196	125.081	yes	0.00771655	90.1421	127.343	0.498446	2.52254
Fasn	fatty acid synthase	45.3872	44.4061	42.6557	75.4059	73.9146	64.3394	yes	0.000658218	44.1497	71.22	0.689879	2.52027
Igf2r	insulin-like growth factor 2 receptor	22.8943	27.3086	33.2488	59.0661	32.2518	58.3067	yes	0.000658218	27.8172	49.8749	0.842334	2.50248
Ptprm	protein tyrosine phosphatase, receptor type, M	13.0971	12.3698	13.0721	33.2681	24.4371	29.422	yes	0.000658218	12.8463	29.0424	1.1768	2.50242
Spry2	sprouty RTK signaling antagonist 2	22.5011	20.432	20.4029	43.5944	33.5339	45.2578	yes	0.000658218	21.112	40.7954	0.950342	2.50166
Abracl	ABRA C-terminal like	80.4909	74.1386	80.2222	114.564	118.662	105.21	yes	0.00470227	78.2839	112.812	0.527133	2.49774
Nceh1	neutral cholesterol ester hydrolase 1	36.4307	46.9326	46.5856	66.5293	54.7099	88.2898	yes	0.000658218	43.3163	69.843	0.689206	2.49366
Esd	esterase D/formylglutathione hydrolase	51.3256	51.1842	57.4778	82.5847	80.2777	83.8455	yes	0.000658218	53.3292	82.236	0.624844	2.48271
Homer2	homer scaffolding protein 2	8.56997	5.65388	11.3764	22.6474	24.5131	19.5882	yes	0.000658218	8.53342	22.2496	1.38258	2.47216
Dtna	dystrobrevin alpha	0.360481	0.318149	0.476773	9.79584	5.57287	6.11287	yes	0.000658218	0.385134	7.16053	4.21663	2.46653
P3h1	prolyl 3-hydroxylase 1	14.2985	12.4986	16.0863	32.274	28.6153	31.5415	yes	0.000658218	14.2945	30.8103	1.10795	2.45917
Lbh	limb-bud and heart	102.657	85.1215	128.391	155.925	138.05	138.726	yes	0.0144247	105.39	144.234	0.452672	2.45855
Fn1	fibronectin 1	0.778061	0.808579	0.490529	12.3584	2.92462	8.34758	yes	0.000658218	0.69239	7.87687	3.50797	2.45428
Myl9	myosin, light polypeptide 9, regulatory	1.47777	2.09093	2.10307	12.7743	8.14404	10.5834	yes	0.000658218	1.89059	10.5006	2.47356	2.44594
Serpini1	serine (or cysteine) peptidase inhibitor, clade I, member 1	0.383101	0.477347	0.304604	6.42456	7.79203	6.96482	yes	0.000658218	0.388351	7.06047	4.18433	2.44467
Gyg	glycogenin	39.084	26.2709	44.5747	66.5986	60.7525	54.8974	yes	0.000658218	36.6432	60.7495	0.729327	2.44268
Hist1h2bc	histone cluster 1, H2bc	44.8	42.8105	38.1462	82.3338	59.6937	60.3462	yes	0.00375207	41.9189	67.4579	0.686387	2.44198
Myl12a	myosin, light chain 12A, regulatory, non-sarcomeric	160.618	143.301	149.482	199.945	192.376	197.362	yes	0.0423285	151.134	196.561	0.379152	2.43623
Nap1l5	nucleosome assembly protein 1-like 5	2.12909	4.02652	1.73477	6.56083	12.1905	16.963	yes	0.000658218	2.63013	11.9048	2.17834	2.43272
Pou3f1	POU domain, class 3, transcription factor 1	4.59935	6.50346	7.72438	14.072	14.891	25.5295	yes	0.000658218	6.27573	18.1642	1.53324	2.40478
Col4a1	collagen, type IV, alpha 1	0.602922	1.00898	0.376932	10.5595	4.45532	7.52389	yes	0.000658218	0.662945	7.5129	3.50241	2.39564
Itgav	integrin alpha V	20.5875	22.2092	23.937	45.5194	35.0776	43.409	yes	0.000658218	22.2446	41.3353	0.893923	2.39422
Mapk8ip1	mitogen-activated protein kinase 8 interacting protein 1	24.593	18.7702	30.3476	38.0369	38.4952	56.828	yes	0.000658218	24.5703	44.4534	0.855379	2.39323
Slpi	secretory leukocyte peptidase inhibitor	11.4631	10.1931	13.0231	9.00421	9.22734	60.5213	yes	0.000658218	11.5598	26.2509	1.18326	2.38918
Phlda3	pleckstrin homology like domain, family A, member 3	26.1285	36.3603	27.4108	56.5156	45.4758	52.5544	yes	0.000658218	29.9665	51.5153	0.781648	2.38721
Aplp1	amyloid beta (A4) precursor-like protein 1	0.564667	0.991954	0.366268	9.14573	3.25919	9.83028	yes	0.000658218	0.640963	7.41173	3.5315	2.38598
Tob1	transducer of ErbB-2.1	18.5163	20.5153	15.9112	40.1034	38.8324	28.5937	yes	0.000658218	18.3143	35.8432	0.96873	2.38191
Dap	death-associated protein	72.7582	57.6923	68.3056	101.094	95.1146	93.5506	yes	0.000658218	66.252	96.5864	0.543855	2.37715
Gusb	glucuronidase, beta	50.8915	47.9584	57.2663	82.12	70.2417	85.4307	yes	0.000658218	52.0387	79.2641	0.607082	2.37595
Cacna1a	calcium channel, voltage-dependent, P/Q type, alpha 1A subunit	0.125649	0.246736	0.0590717	4.41906	7.26161	6.47167	yes	0.000658218	0.143819	6.05078	5.3948	2.37333
Zswim7	zinc finger SWIM-type containing 7	7.25558	4.97037	6.51114	18.3099	20.0061	15.3507	yes	0.00122911	6.2457	17.8889	1.51813	2.37002
Gabrb2	gamma-aminobutyric acid (GABA) A receptor, subunit beta 2	2.21815	1.58089	2.85114	13.7918	8.39183	9.61394	yes	0.000658218	2.21673	10.5992	2.25745	2.34151
Rock2	Rho-associated coiled-coil containing protein kinase 2	24.1944	23.6078	22.0876	41.6925	36.4356	48.6291	yes	0.000658218	23.2966	42.2524	0.858914	2.34131
Rhoj	ras homolog family member J	31.992	33.6786	30.091	51.7971	47.4374	60.947	yes	0.000658218	31.9205	53.3938	0.742188	2.32481
Cela1	chymotrypsin-like elastase family, member 1	0.563376	1.78383	1.17168	10.5098	7.77304	6.61179	yes	0.000658218	1.17296	8.29821	2.82264	2.31525
Fhl3	four and a half LIM domains 3	5.66021	5.05712	4.79221	15.5626	13.9343	17.7397	yes	0.000658218	5.16985	15.7455	1.60675	2.31247
Hmga1	high mobility group AT-hook 1	13.6252	17.2595	11.4792	32.2058	33.9463	21.9386	yes	0.000658218	14.1213	29.3636	1.05615	2.31143
Xpo6	exportin 6	33.1744	30.2096	30.5716	53.6386	56.1271	47.5863	yes	0.000658218	31.3185	52.4507	0.743944	2.30888
Atf3	activating transcription factor 3	62.6478	61.2985	49.5072	79.6037	90.1643	85.885	yes	0.000658218	57.8178	85.2177	0.559638	2.291
Map2k3	mitogen-activated protein kinase kinase 3	55.9541	61.4555	53.5963	84.1235	83.2884	85.0088	yes	0.000658218	57.002	84.1402	0.561784	2.2843
Atf4	activating transcription factor 4	135.068	122.035	120.973	173.884	170.906	150.06	yes	0.0422148	126.025	164.95	0.388315	2.2819
Gcnt2	glucosaminyl (N-acetyl) transferase 2, I-branching enzyme	2.36886	4.09105	1.98361	12.219	9.44771	12.6059	yes	0.000658218	2.81451	11.4242	2.02114	2.28167
Ywhag	tyrosine 3-monooxygenase/tryptophan 5-monooxygenase activation protein, gamma polypeptide	52.7233	50.0672	63.3033	85.6346	78.7051	81.9323	yes	0.000658218	55.3646	82.0907	0.568254	2.27958
Kctd1	potassium channel tetramerisation domain containing 1	21.014	20.6287	18.1451	37.3264	37.4021	36.6394	yes	0.000658218	19.9293	37.1226	0.89741	2.27628
Ctsk	cathepsin K	16.9381	19.5796	6.29937	29.1552	18.3262	40.4073	yes	0.000658218	14.2724	29.2962	1.03749	2.27612
Cdkn2a	cyclin dependent kinase inhibitor 2A	0.0877152	0.315536	0.120929	12.2641	2.62345	2.12637	yes	0.0203775	0.174727	5.67131	5.02051	2.27333
Tcn2	transcobalamin 2	124.253	94.4437	132.544	149.476	150.434	163.576	yes	0.0336727	117.08	154.495	0.400066	2.2704
1110007C09Rik	caspase recruitment domain family, member 19	92.7467	60.0637	83.1836	100.727	111.929	116.843	yes	0.00936199	78.6647	109.833	0.481524	2.27018
Slc20a1	solute carrier family 20, member 1	21.9803	29.0093	15.4953	41.7204	42.1022	36.3099	yes	0.000658218	22.1616	40.0442	0.853528	2.26732
Ndrg3	N-myc downstream regulated gene 3	55.2692	42.9667	51.3436	81.6176	78.3223	65.6816	yes	0.000658218	49.8598	75.2072	0.592992	2.26653
Slc2a1	solute carrier family 2 (facilitated glucose transporter), member 1	32.4337	38.9122	33.8626	59.9108	60.1272	50.2644	yes	0.000658218	35.0695	56.7675	0.694847	2.26418
Ehbp1l1	EH domain binding protein 1-like 1	7.9392	7.51375	10.0555	24.231	15.9933	22.0074	yes	0.000658218	8.50282	20.7439	1.28667	2.2635
Ggh	gamma-glutamyl hydrolase	23.4586	27.558	22.8468	44.7207	38.0897	46.9452	yes	0.000658218	24.6211	43.2519	0.812865	2.26142
Hr	lysine demethylase and nuclear receptor corepressor	28.3303	32.7444	35.641	58.1198	54.1818	47.0811	yes	0.000658218	32.2386	53.1276	0.720673	2.26087
Osgin2	oxidative stress induced growth inhibitor family member 2	7.35314	7.36744	6.60252	16.1046	21.7126	17.8064	yes	0.000658218	7.1077	18.5412	1.38328	2.25759
Rasgef1c	RasGEF domain family, member 1C	0.220291	0.227847	0.174498	5.14208	6.61498	5.07601	yes	0.000658218	0.207545	5.61102	4.75677	2.24009
Rftn1	raftlin lipid raft linker 1	7.32351	7.14004	5.86802	14.525	16.3095	22.7256	yes	0.000658218	6.77719	17.8534	1.39744	2.23179
Gem	GTP binding protein (gene overexpressed in skeletal muscle)	5.39017	3.92456	5.98236	13.5934	11.4248	20.3697	yes	0.000658218	5.09903	15.1293	1.56905	2.23014
Adm	adrenomedullin	2.01049	1.24255	1.72853	7.13463	8.58606	10.8849	yes	0.000658218	1.66052	8.86853	2.41706	2.22137
P2rx4	purinergic receptor P2X, ligand-gated ion channel 4	60.5103	52.2018	63.7486	83.2866	81.2302	91.8366	yes	0.00122911	58.8202	85.4511	0.538787	2.21715
Cast	calpastatin	57.5376	59.0946	48.0224	87.3002	80.0163	74.7318	yes	0.00177006	54.8849	80.6828	0.555852	2.21568
Srebf1	sterol regulatory element binding transcription factor 1	38.3043	33.3665	41.2677	58.1856	59.5392	60.5943	yes	0.0147786	37.6462	59.4397	0.658924	2.21182
Nfe2l1	nuclear factor, erythroid derived 2,-like 1	35.8074	42.8643	36.7137	64.4266	58.0481	58.4766	yes	0.000658218	38.4618	60.3171	0.649141	2.199
Plod1	procollagen-lysine, 2-oxoglutarate 5-dioxygenase 1	24.3684	21.1312	29.6877	48.6891	39.3929	41.5968	yes	0.000658218	25.0624	43.2263	0.786382	2.19803
Fmn2	formin 2	0.718453	1.23676	1.69289	5.88697	8.3372	9.22783	yes	0.000658218	1.21603	7.81733	2.68449	2.19637
AI413582	expressed sequence AI413582	42.0157	35.1728	57.0236	56.5321	68.7649	78.5181	yes	0.0113598	44.7374	67.9384	0.602746	2.1857
Mxra8	matrix-remodelling associated 8	1.33678	0.639662	1.77223	8.89152	6.7592	7.81466	yes	0.000658218	1.24956	7.82179	2.64608	2.18211
Cyb5b	cytochrome b5 type B	52.4554	52.1082	58.0986	86.4506	81.3567	70.4127	yes	0.00177006	54.2207	79.4067	0.550416	2.17876
Stom	stomatin	11.0444	16.7002	9.79622	22.2888	20.5939	35.2329	yes	0.000658218	12.5136	26.0385	1.05715	2.17826
Myzap	myocardial zonula adherens protein	0.24316	0.22361	0.171251	5.93117	6.014	4.06137	yes	0.000658218	0.212674	5.33551	4.64891	2.17488
Git1	G protein-coupled receptor kinase-interactor 1	34.7132	30.503	34.7234	57.6468	52.3577	50.6963	yes	0.000658218	33.3132	53.5669	0.685249	2.17293
Nr4a2	nuclear receptor subfamily 4, group A, member 2	2.50368	2.77672	1.99849	10.6164	10.1673	9.58598	yes	0.000658218	2.4263	10.1232	2.06084	2.17272
Gabarapl1	gamma-aminobutyric acid (GABA) A receptor-associated protein-like 1	111.41	73.128	116.553	137.337	127.182	135.799	yes	0.018354	100.364	133.439	0.410947	2.16313
Lrrc75a	leucine rich repeat containing 75A	8.21007	5.25934	8.28937	18.1736	13.5943	22.5493	yes	0.000658218	7.25293	18.1057	1.31981	2.15516
Col5a3	collagen, type V, alpha 3	7.439	10.2129	11.1963	14.5708	12.1494	38.2632	yes	0.000658218	9.61607	21.6611	1.17159	2.15375
Plk3	polo like kinase 3	16.3836	18.884	18.5234	32.663	30.491	36.7182	yes	0.000658218	17.9303	33.2907	0.892718	2.14624
Crct1	cysteine-rich C-terminal 1	1.66257	1.17732	0.846471	1.15393	2.69601	18.8667	yes	0.000658218	1.22879	7.57221	2.62348	2.13825
Eif4ebp1	eukaryotic translation initiation factor 4E binding protein 1	40.2449	39.8111	41.2488	68.0076	57.7583	60.4528	yes	0.00280352	40.4349	62.0729	0.618361	2.13716
Hgsnat	heparan-alpha-glucosaminide N-acetyltransferase	31.6166	32.0383	37.9181	55.1177	52.0922	54.3711	yes	0.000658218	33.8577	53.8603	0.669741	2.13572
Tubb4a	tubulin, beta 4A class IVA	0.832647	0.344449	0.835361	6.06276	6.0045	6.84768	yes	0.000658218	0.670819	6.30498	3.2325	2.1332
Snd1	staphylococcal nuclease and tudor domain containing 1	84.4233	79.2669	84.8073	112.746	113.572	111.569	yes	0.0144247	82.8325	112.629	0.44331	2.13125
Diap1	diaphanous related formin 1	18.728	20.7517	20.1195	36.3158	35.5181	35.2498	yes	0.000658218	19.8664	35.6946	0.845374	2.12347
Sulf2	sulfatase 2	78.68	107.566	89.5193	130.845	108.786	129.457	yes	0.0293935	91.9218	123.029	0.420524	2.12176
Ppard	peroxisome proliferator activator receptor delta	19.2276	18.6102	22.5599	37.4731	31.8021	38.7607	yes	0.000658218	20.1326	36.012	0.838945	2.11924
Rfk	riboflavin kinase	27.459	25.4947	30.4202	43.3463	44.1817	50.3943	yes	0.000658218	27.7913	45.9741	0.726188	2.11707
Nes	nestin	0.17975	0.236828	0.0906593	8.56813	1.78991	4.5369	yes	0.000658218	0.169079	4.96498	4.87602	2.1166
Arpc4	actin related protein 2/3 complex, subunit 4	72.4039	67.0962	86.0173	96.6349	99.3066	114.405	yes	0.00771655	75.1725	103.449	0.460641	2.11571
Tmem123	transmembrane protein 123	66.667	61.06	70.5715	93.2086	91.5083	93.3085	yes	0.00326971	66.0995	92.6751	0.487543	2.10908
Scn1b	sodium channel, voltage-gated, type I, beta	1.84664	1.11727	1.68926	9.95483	6.50273	7.83192	yes	0.000658218	1.55106	8.09649	2.38405	2.10732
Srxn1	sulfiredoxin 1 homolog (S. cerevisiae)	11.3196	15.1781	11.3153	25.8007	24.221	26.7936	yes	0.000658218	12.6043	25.6051	1.02251	2.10321
Csrp2	cysteine and glycine-rich protein 2	19.0138	16.3408	21.8571	34.076	36.2931	32.704	yes	0.00280352	19.0706	34.3577	0.849286	2.09142
Arhgap27	Rho GTPase activating protein 27	2.09755	3.56375	2.20466	11.3209	9.59263	9.29538	yes	0.000658218	2.62199	10.0696	1.94128	2.09055
Tom1l2	target of myb1-like 2 (chicken)	23.1902	24.8571	24.9545	43.7297	43.6729	36.3741	yes	0.000658218	24.3339	41.2589	0.761736	2.08978
Specc1	sperm antigen with calponin homology and coiled-coil domains 1	36.478	27.7698	40.2876	50.7109	53.2689	59.7376	yes	0.000658218	34.8451	54.5725	0.647216	2.0862
Tmbim1	transmembrane BAX inhibitor motif containing 1	67.7207	54.6657	70.6636	93.3214	85.1929	92.2213	yes	0.010183	64.35	90.2452	0.48791	2.08267
Herc3	hect domain and RLD 3	3.4187	3.85346	2.96358	11.2825	11.7403	11.1864	yes	0.000658218	3.41191	11.4031	1.74077	2.07615
Rsu1	Ras suppressor protein 1	110.372	82.4335	109.611	131.696	136.335	129.477	yes	0.0274749	100.805	132.503	0.394447	2.07518
Ldlrad3	low density lipoprotein receptor class A domain containing 3	34.3916	24.7014	32.0107	47.452	55.2507	43.7022	yes	0.000658218	30.3679	48.8016	0.684382	2.07174
Snta1	syntrophin, acidic 1	17.2597	15.841	22.4338	35.8899	32.9634	31.3837	yes	0.000658218	18.5115	33.4123	0.851959	2.06789
Tspan15	tetraspanin 15	0.906961	1.00577	1.33896	7.31346	4.63504	8.76418	yes	0.000658218	1.0839	6.90423	2.67125	2.05933
Nppb	natriuretic peptide type B	1.86896	0.132001	0.151442	0.228056	0.125931	17.8847	yes	0.0081231	0.717468	6.07956	3.08298	2.05672
Mthfd2	methylenetetrahydrofolate dehydrogenase (NAD+ dependent), methenyltetrahydrofolate cyclohydrolase	5.57135	8.08892	6.00458	18.5877	15.9929	14.5545	yes	0.000658218	6.55495	16.3784	1.32113	2.0513
Kitl	kit ligand	5.72531	5.37451	5.76311	13.011	13.0925	18.5853	yes	0.000658218	5.62098	14.8963	1.40606	2.04771
Gmpr	guanosine monophosphate reductase	2.93652	2.23606	1.67006	8.80033	9.61932	9.22928	yes	0.000658218	2.28088	9.21631	2.0146	2.0454
Fmnl2	formin-like 2	30.0634	28.2538	31.5127	50.1443	45.9523	47.8737	yes	0.000658218	29.9433	47.9901	0.680504	2.04427
Kctd17	potassium channel tetramerisation domain containing 17	17.468	16.2069	21.5631	30.0874	33.0357	35.9004	yes	0.000658218	18.4127	33.0078	0.84211	2.03536
Edem1	ER degradation enhancer, mannosidase alpha-like 1	21.7714	21.8118	26.4418	41.173	37.2278	39.7773	yes	0.000658218	23.3417	39.3927	0.755021	2.02652
Sars	seryl-aminoacyl-tRNA synthetase	66.09	62.1552	62.7447	84.9319	91.0215	90.0157	yes	0.00326971	63.6633	88.6564	0.477762	2.02508
Tmem63a	transmembrane protein 63a	23.1238	21.298	24.1689	34.8117	39.3771	42.0637	yes	0.000658218	22.8636	38.7508	0.761177	2.02399
Smap2	small ArfGAP 2	26.075	24.489	29.0537	38.167	42.9518	48.8824	yes	0.000658218	26.5392	43.3337	0.707364	2.00915
Arhgap44	Rho GTPase activating protein 44	0.782326	0.844245	1.33973	8.50103	4.91334	6.02352	yes	0.000658218	0.988767	6.4793	2.71213	2.00914
Magi3	membrane associated guanylate kinase, WW and PDZ domain containing 3	3.87047	3.22937	2.83219	9.18724	11.2883	12.1561	yes	0.000658218	3.31068	10.8772	1.71611	2.00881
Cnppd1	cyclin Pas1/PHO80 domain containing 1	48.8865	35.9524	56.6699	64.6124	70.0154	71.6891	yes	0.00122911	47.1696	68.7723	0.54397	2.00626
Aars	alanyl-tRNA synthetase	60.1998	59.838	64.9625	83.5523	80.6214	93.6831	yes	0.00771655	61.6668	85.9523	0.479042	1.99883
Actr2	ARP2 actin-related protein 2	92.3996	92.2887	98.7568	125.706	121.988	124.39	yes	0.0482462	94.4817	124.028	0.392559	1.99879
Atp2b1	ATPase, Ca++ transporting, plasma membrane 1	20.793	22.3633	21.352	40.0889	33.4911	36.6767	yes	0.000658218	21.5028	36.7522	0.77331	1.99797
Cflar	CASP8 and FADD-like apoptosis regulator	11.84	10.4996	13.5114	24.8083	21.5737	24.9176	yes	0.000658218	11.9503	23.7665	0.991881	1.97716
Aass	aminoadipate-semialdehyde synthase	0.144328	0.133404	0.102148	5.01235	3.54126	4.2391	yes	0.000658218	0.126627	4.26424	5.07363	1.97458
Rheb	Ras homolog enriched in brain	56.5986	48.061	53.1406	79.4152	77.51	67.7493	yes	0.00326971	52.6001	74.8915	0.509737	1.97423
Hacd1	3-hydroxyacyl-CoA dehydratase 1	33.1347	29.8307	34.5865	49.2757	49.7458	52.4713	yes	0.00280352	32.5173	50.4976	0.635007	1.97342
Gadd45b	growth arrest and DNA-damage-inducible 45 beta	9.60979	11.0712	7.31831	22.018	20.2086	17.8286	yes	0.000658218	9.3331	20.0184	1.1009	1.97229
Tmem120a	transmembrane protein 120A	30.8146	25.3342	28.3755	43.7128	46.3953	44.8156	yes	0.000658218	28.1748	44.9746	0.674706	1.96426
Phldb1	pleckstrin homology like domain, family B, member 1	14.1767	14.7713	16.0962	33.7143	27.9868	21.8068	yes	0.000658218	15.0147	27.836	0.890571	1.95862
Kras	Kirsten rat sarcoma viral oncogene homolog	43.4123	34.8934	39.6141	51.7285	54.3034	69.7893	yes	0.000658218	39.3066	58.6071	0.576303	1.9505
Mmd	monocyte to macrophage differentiation-associated	12.2689	12.157	14.2547	29.2605	21.6453	23.6716	yes	0.000658218	12.8935	24.8591	0.947128	1.94742
Plekho2	pleckstrin homology domain containing, family O member 2	10.6778	8.35151	13.1336	25.2355	19.3486	20.7432	yes	0.000658218	10.721	21.7758	1.02229	1.93924
Enpep	glutamyl aminopeptidase	0.728087	0.952135	1.0489	5.27413	6.95388	5.77303	yes	0.000658218	0.909707	6.00035	2.72157	1.93656
Ttll1	tubulin tyrosine ligase-like 1	8.83491	7.74063	9.27311	20.0789	17.8491	18.1862	yes	0.000658218	8.61622	18.7047	1.11828	1.9301
Mgat2	mannoside acetylglucosaminyltransferase 2	26.5334	22.5772	25.0108	43.3887	37.5244	39.6704	yes	0.000658218	24.7071	40.1945	0.70207	1.92243
Slmo2	PRELI domain containing 3B	66.1803	59.5057	58.752	86.9194	87.1926	79.8448	yes	0.00853522	61.4793	84.6523	0.461447	1.91694
Afg3l2	AFG3-like AAA ATPase 2	37.5897	37.4434	37.2886	55.9554	54.309	57.4047	yes	0.000658218	37.4406	55.8897	0.57798	1.9097
Slc39a6	solute carrier family 39 (metal ion transporter), member 6	83.3166	66.692	93.0641	107.649	100.981	112.88	yes	0.0339854	81.0242	107.17	0.403476	1.90589
Cnfn	cornifelin	16.5945	22.4668	19.1064	12.0042	12.9351	74.6779	yes	0.032708	19.3892	33.2057	0.776177	1.90514
Large	LARGE xylosyl- and glucuronyltransferase 1	12.0901	9.64847	10.7468	23.2492	22.5822	19.183	yes	0.000658218	10.8285	21.6715	1.00097	1.90199
Zfand2a	zinc finger, AN1-type domain 2A	11.8105	9.50606	11.9627	22.6948	17.9275	25.2445	yes	0.000658218	11.0931	21.9556	0.984928	1.88953
Map1b	microtubule-associated protein 1B	8.95465	8.99041	7.46984	18.9925	17.5864	18.0533	yes	0.000658218	8.47163	18.2107	1.10408	1.88541
Cttn	cortactin	75.1066	68.3832	78.9078	99.4114	94.3299	102.152	yes	0.0203775	74.1325	98.6311	0.411936	1.86387
Pttg1	pituitary tumor-transforming gene 1	21.1903	16.1873	8.66441	23.6201	34.3259	24.7187	yes	0.010183	15.3473	27.5549	0.844321	1.86376
St8sia6	ST8 alpha-N-acetyl-neuraminide alpha-2,8-sialyltransferase 6	1.86063	1.70868	1.35873	9.56212	7.00791	4.96196	yes	0.000658218	1.64268	7.17733	2.1274	1.86361
Dusp2	dual specificity phosphatase 2	16.994	12.5521	21.9475	28.1959	30.814	30.8517	yes	0.000658218	17.1645	29.9539	0.803312	1.86317
Casp1	caspase 1	24.2153	22.6147	29.4375	37.633	35.0064	48.4617	yes	0.00122911	25.4225	40.367	0.667072	1.84248
Tmem151a	transmembrane protein 151A	0.704445	0.415816	0.764125	6.17131	6.73092	2.04532	yes	0.000658218	0.628129	4.98252	2.98774	1.83832
Itga1	integrin alpha 1	0.0969665	0.20226	0.154853	5.27606	2.68518	3.44949	yes	0.00177006	0.15136	3.80358	4.6513	1.83648
Strip2	striatin interacting protein 2	0.293137	0.0919534	0.123207	4.07118	4.07933	3.40494	yes	0.000658218	0.169432	3.85182	4.50676	1.83632
Hcn1	hyperpolarization-activated, cyclic nucleotide-gated K+ 1	1.71503	2.15491	2.49788	8.90953	7.32643	7.60408	yes	0.000658218	2.12261	7.94668	1.90452	1.83539
Ppap2c	phospholipid phosphatase 2	29.0014	34.3751	31.7107	51.7923	47.2031	44.9003	yes	0.00122911	31.6957	47.9652	0.5977	1.82285
Cln5	ceroid-lipofuscinosis, neuronal 5	31.6192	28.136	35.2193	45.1905	45.8844	52.6359	yes	0.000658218	31.6582	47.9036	0.597556	1.82129
Slc2a4	solute carrier family 2 (facilitated glucose transporter), member 4	0.75032	0.59296	0.170277	3.00373	5.43952	5.4174	yes	0.000658218	0.504519	4.62022	3.19498	1.81806
Slc4a2	solute carrier family 4 (anion exchanger), member 2	29.3806	26.5188	35.1165	49.868	42.5844	46.2552	yes	0.000658218	30.3386	46.2359	0.607856	1.81668
I730030J21Rik	RIKEN cDNA I730030J21 gene	2.45578	1.19976	1.59307	4.36022	7.24645	9.9164	yes	0.00375207	1.74954	7.17436	2.03588	1.81597
Lrrc59	leucine rich repeat containing 59	77.6101	82.0687	77.3468	103.585	102.832	103.926	yes	0.0389988	79.0085	103.448	0.388821	1.80928
Zcchc24	zinc finger, CCHC domain containing 24	5.38942	5.37312	7.26382	13.9427	12.0168	16.3777	yes	0.000658218	6.00879	14.1124	1.23182	1.80656
Cdkn2b	cyclin dependent kinase inhibitor 2B	3.69582	3.30211	2.82741	12.0742	8.61762	8.70058	yes	0.000658218	3.27511	9.79747	1.58086	1.80395
Trib3	tribbles pseudokinase 3	1.06493	1.0057	0.818399	5.58268	4.74819	6.38179	yes	0.000658218	0.96301	5.57089	2.53228	1.80266
Cdk2ap2	CDK2-associated protein 2	42.6751	39.9898	52.3008	62.2863	63.1338	65.8529	yes	0.0200754	44.9886	63.7577	0.50304	1.79985
Mef2d	myocyte enhancer factor 2D	28.5369	29.1565	29.7803	43.9056	45.2311	44.69	yes	0.000658218	29.1579	44.6089	0.613445	1.79898
Gpx8	glutathione peroxidase 8 (putative)	36.265	28.058	38.7497	48.1865	47.5213	57.1707	yes	0.00771655	34.3576	50.9595	0.568723	1.79738
Msi2	musashi RNA-binding protein 2	9.37542	9.84356	13.8022	18.8789	20.7154	24.0023	yes	0.000658218	11.0071	21.1989	0.945558	1.7959
Msrb3	methionine sulfoxide reductase B3	1.8565	3.01782	1.35077	7.74719	9.37754	5.8683	yes	0.000658218	2.07503	7.66434	1.88503	1.79099
Gabra1	gamma-aminobutyric acid (GABA) A receptor, subunit alpha 1	0.887704	0.972354	1.27626	7.0757	5.21998	4.76539	yes	0.000658218	1.04544	5.68702	2.44356	1.78887
Prune2	prune homolog 2	14.9924	13.3088	14.3071	26.728	26.8445	22.7093	yes	0.000658218	14.2028	25.4273	0.840204	1.78301
B3gnt9	UDP-GlcNAc:betaGal beta-1,3-N-acetylglucosaminyltransferase 9	3.77851	2.90127	3.75398	10.4856	7.28905	12.2981	yes	0.00691313	3.47792	10.0243	1.5272	1.78154
Nagk	N-acetylglucosamine kinase	58.8589	42.9331	69.1719	68.2167	73.8934	90.5796	yes	0.0180095	56.988	77.5632	0.444716	1.77379
Diras2	DIRAS family, GTP-binding RAS-like 2	1.01458	2.64766	1.01361	4.40852	5.71693	9.73286	yes	0.000658218	1.55862	6.61944	2.08644	1.76968
Prkcdbp	caveolae associated 3	25.9192	37.5855	29.5181	47.8983	50.7668	41.1009	yes	0.00608033	31.0076	46.5887	0.587357	1.76879
Plekha3	pleckstrin homology domain-containing, family A (phosphoinositide binding specific) member 3	19.338	17.1209	18.4882	29.9381	28.4063	33.602	yes	0.000658218	18.3157	30.6488	0.74275	1.76251
Lyst	lysosomal trafficking regulator	22.0242	20.9777	22.645	39.439	32.5098	33.6241	yes	0.000658218	21.8823	35.191	0.685441	1.76164
Ndfip2	Nedd4 family interacting protein 2	46.7535	44.338	50.2722	64.835	69.5913	63.0424	yes	0.00608033	47.1212	65.8229	0.482212	1.75974
2610524H06Rik	RIKEN cDNA 2610524H06 gene	9.92562	10.605	8.7599	18.2916	16.9798	22.4131	yes	0.00470227	9.76351	19.2282	0.97775	1.7578
Rgl1	ral guanine nucleotide dissociation stimulator,-like 1	20.797	15.8164	17.5593	30.6069	29.852	30.3187	yes	0.000658218	18.0576	30.2592	0.74477	1.75537
Parp3	poly (ADP-ribose) polymerase family, member 3	5.98586	4.59905	6.86043	13.4811	11.8778	15.2521	yes	0.000658218	5.81511	13.537	1.21903	1.75533
Atxn10	ataxin 10	76.2057	59.8617	69.4068	88.7974	95.6421	87.3031	yes	0.0241471	68.4914	90.5809	0.403283	1.75141
Xrra1	X-ray radiation resistance associated 1	0.208175	0.223748	0.0734337	3.47768	4.09818	2.95445	yes	0.000658218	0.168452	3.5101	4.3811	1.7423
C2cd4b	C2 calcium-dependent domain containing 4B	0.500529	0.341563	0.0785064	3.53278	2.08736	5.93569	yes	0.00326971	0.306866	3.85194	3.64991	1.73837
Npdc1	neural proliferation, differentiation and control 1	28.8004	19.0639	34.492	38.4778	40.1088	47.01	yes	0.00326971	27.4521	41.8655	0.608846	1.73119
Adam15	a disintegrin and metallopeptidase domain 15 (metargidin)	21.0907	20.4562	22.1236	35.762	34.8423	31.6488	yes	0.000658218	21.2235	34.0844	0.683448	1.72933
Sprr2e	small proline-rich protein 2E	0.128682	3.05113	1.75545	0.01	0.496109	19.3236	yes	0.0169706	1.64509	6.6099	2.00646	1.728
Cnih1	cornichon family AMPA receptor auxiliary protein 1	63.8384	50.9151	54.9064	76.2126	81.7942	71.2513	yes	0.0177102	56.5533	76.4194	0.434327	1.72278
Dusp3	dual specificity phosphatase 3 (vaccinia virus phosphatase VH1-related)	31.1086	28.405	36.2434	45.2501	44.2724	52.2016	yes	0.000658218	31.919	47.2414	0.565635	1.72215
Camk1	calcium/calmodulin-dependent protein kinase I	14.6535	11.4595	14.104	23.849	22.3173	25.5572	yes	0.00229676	13.4057	23.9078	0.83464	1.71928
Gng4	guanine nucleotide binding protein (G protein), gamma 4	1.22467	0.933564	1.4892	4.58837	5.38898	7.20866	yes	0.000658218	1.21581	5.72867	2.23628	1.7125
Sema3d	sema domain, immunoglobulin domain (Ig), short basic domain, secreted, (semaphorin) 3D	1.58741	2.34398	0.850057	10.118	6.355	2.87762	yes	0.000658218	1.59382	6.45021	2.01686	1.71229
Vimp	selenoprotein S	74.0237	71.3062	76.9514	91.4664	98.3893	99.4437	yes	0.0455783	74.0938	96.4331	0.380177	1.7107
Mmgt2	membrane magnesium transporter 2	15.6715	12.1579	15.5025	23.7607	23.9522	27.7926	yes	0.000658218	14.444	25.1685	0.801152	1.70397
Slc16a1	solute carrier family 16 (monocarboxylic acid transporters), member 1	10.9301	14.3084	10.5113	20.0421	23.4199	21.8798	yes	0.000658218	11.9166	21.7806	0.870071	1.69925
Auh	AU RNA binding protein/enoyl-coenzyme A hydratase	13.2365	9.57486	12.3208	20.1816	20.3447	23.8498	yes	0.00122911	11.7107	21.4587	0.873733	1.69257
Tusc3	tumor suppressor candidate 3	47.4549	47.7805	45.1503	66.3827	61.9536	65.5717	yes	0.0180095	46.7952	64.636	0.465976	1.69009
Lhfp	lipoma HMGIC fusion partner	21.3742	23.4085	13.5405	26.6687	20.2563	47.5338	yes	0.000658218	19.4411	31.4863	0.695615	1.68787
Scarb2	scavenger receptor class B, member 2	47.6702	44.5187	51.0506	66.0619	60.0552	70.955	yes	0.006476	47.7465	65.6907	0.460294	1.68479
Rragd	Ras-related GTP binding D	15.379	8.8105	19.6277	25.8891	24.761	25.0526	yes	0.000658218	14.6057	25.2342	0.788847	1.68389
Ppp1r17	protein phosphatase 1, regulatory subunit 17	0.0733368	0.352484	0.231423	3.11984	3.37318	3.78889	yes	0.00122911	0.219081	3.4273	3.96754	1.68009
Ptrh1	peptidyl-tRNA hydrolase 1 homolog	23.3125	20.5311	24.7188	35.9988	38.075	32.8339	yes	0.0105984	22.8541	35.6359	0.640876	1.67128
Tcf12	transcription factor 12	57.0459	55.8905	52.9354	78.4206	74.2289	70.2936	yes	0.0207306	55.2906	74.3144	0.426607	1.67104
Ppp2r5b	protein phosphatase 2, regulatory subunit B', beta	17.956	15.4941	19.0435	26.8061	26.7278	33.0916	yes	0.000658218	17.4979	28.8752	0.72265	1.67073
Frmd8	FERM domain containing 8	34.6242	29.2678	41.3589	52.7445	45.9662	52.8385	yes	0.00326971	35.0836	50.5164	0.525954	1.66804
Stk39	serine/threonine kinase 39	16.5366	13.9403	17.8007	29.7031	24.1377	27.2879	yes	0.000658218	16.0925	27.0429	0.748858	1.66729
Ramp2	receptor (calcitonin) activity modifying protein 2	2.45916	4.55666	2.09586	9.9368	11.4434	4.87534	yes	0.00424048	3.03723	8.75185	1.52683	1.66436
Abl2	v-abl Abelson murine leukemia viral oncogene 2 (arg, Abelson-related gene)	12.2646	15.2241	9.32717	22.4532	20.7208	22.8512	yes	0.000658218	12.272	22.0084	0.842689	1.66294
Smagp	small cell adhesion glycoprotein	12.9069	12.8712	11.1794	21.5477	18.5495	26.0886	yes	0.00229676	12.3192	22.0619	0.840655	1.66158
Scarb1	scavenger receptor class B, member 1	35.2238	28.8298	38.625	51.865	54.953	41.4489	yes	0.00229676	34.2262	49.4223	0.530061	1.66151
Ubash3b	ubiquitin associated and SH3 domain containing, B	2.76897	2.88885	2.46658	7.92021	6.37264	10.1219	yes	0.000658218	2.70813	8.13825	1.58742	1.6488
Map6	microtubule-associated protein 6	62.8682	57.996	64.3515	81.0631	71.027	92.2466	yes	0.0389988	61.7386	81.4456	0.399664	1.64692
Mthfd1l	methylenetetrahydrofolate dehydrogenase (NADP+ dependent) 1-like	73.8893	65.1324	63.5596	84.332	93.5388	86.3093	yes	0.0407075	67.5271	88.06	0.383021	1.64613
Gab2	growth factor receptor bound protein 2-associated protein 2	6.81513	5.73195	5.79759	13.4203	12.8836	13.8344	yes	0.000658218	6.11489	13.3794	1.12962	1.64533
Rgs3	regulator of G-protein signaling 3	1.03478	1.03086	1.16244	5.33433	4.72487	5.51527	yes	0.000658218	1.07603	5.19149	2.27043	1.64388
Ttc39b	tetratricopeptide repeat domain 39B	4.4945	9.21114	3.23295	13.3729	10.5269	14.1403	yes	0.000658218	5.6462	12.68	1.16721	1.64307
Gnptab	N-acetylglucosamine-1-phosphate transferase, alpha and beta subunits	25.2403	22.77	26.1861	39.3707	38.5203	35.2356	yes	0.000658218	24.7321	37.7089	0.608517	1.64222
Cftr	cystic fibrosis transmembrane conductance regulator	0.955147	0.91975	0.850871	4.76893	5.1895	4.5222	yes	0.000658218	0.908589	4.82688	2.40939	1.63611
Cpne2	copine II	8.13871	8.49475	6.40665	14.8739	13.8707	17.959	yes	0.000658218	7.68004	15.5679	1.01939	1.63593
Aldh18a1	aldehyde dehydrogenase 18 family, member A1	13.9798	16.3978	12.5011	27.2304	23.663	22.529	yes	0.000658218	14.2929	24.4741	0.775959	1.63519
Mlec	malectin	29.8951	33.7905	34.9611	48.491	42.0886	51.8736	yes	0.00177006	32.8822	47.4844	0.530145	1.62884
Ergic1	endoplasmic reticulum-golgi intermediate compartment (ERGIC) 1	32.5817	32.9239	34.4352	46.38	46.9001	50.7225	yes	0.00177006	33.3136	48.0009	0.526949	1.62876
Tmed3	transmembrane p24 trafficking protein 3	67.1812	56.9984	64.636	85.5367	79.5615	82.6202	yes	0.0375068	62.9385	82.5728	0.391723	1.62767
Sh3gl2	SH3-domain GRB2-like 2	2.8688	2.59513	2.70682	6.0691	9.37494	8.75782	yes	0.000658218	2.72358	8.06729	1.56658	1.62672
Man1c1	mannosidase, alpha, class 1C, member 1	8.88396	5.62549	10.7019	16.7945	14.2226	18.4485	yes	0.000658218	8.40378	16.4885	0.972352	1.62044
Flii	flightless I actin binding protein	51.3681	43.3344	59.394	69.1748	67.3018	70.8786	yes	0.0455783	51.3655	69.1184	0.42827	1.61735
Cdh6	cadherin 6	0.277452	0.479264	0.183509	3.60692	2.46951	4.26578	yes	0.000658218	0.313408	3.4474	3.45939	1.61606
Stxbp1	syntaxin binding protein 1	12.0397	8.02244	11.0791	18.4774	20.6421	18.3396	yes	0.000658218	10.3804	19.153	0.883709	1.61426
Cbfa2t3	CBFA2/RUNX1 translocation partner 3	1.13467	0.820081	1.25937	6.00783	4.00491	5.16338	yes	0.000658218	1.07137	5.05871	2.23931	1.61046
Lonp2	lon peptidase 2, peroxisomal	39.7051	36.5215	44.6673	53.0285	59.3725	55.8289	yes	0.00691313	40.298	56.0766	0.476693	1.60727
Creld1	cysteine-rich with EGF-like domains 1	13.052	10.7839	15.6441	22.9234	18.4368	27.026	yes	0.000658218	13.16	22.7954	0.792583	1.6069
Ckap4	cytoskeleton-associated protein 4	29.539	31.7305	27.4011	42.1176	41.4663	46.1452	yes	0.00122911	29.5569	43.243	0.548974	1.60404
Rgs7bp	regulator of G-protein signalling 7 binding protein	1.96262	1.59298	2.05214	6.43126	6.65398	6.39319	yes	0.000658218	1.86925	6.49281	1.79639	1.5989
Spry4	sprouty RTK signaling antagonist 4	1.20131	1.38418	1.10057	6.13796	4.67897	5.14332	yes	0.000658218	1.22869	5.32008	2.11433	1.59879
Fndc3b	fibronectin type III domain containing 3B	6.69243	6.26254	6.80278	16.7187	12.1703	12.4776	yes	0.000658218	6.58592	13.7889	1.06605	1.59575
Lifr	LIF receptor alpha	4.34096	5.45653	3.19244	12.5161	12.5145	6.35549	yes	0.000658218	4.32998	10.462	1.27273	1.59438
Sec24d	Sec24 related gene family, member D (S. cerevisiae)	6.21678	5.25843	4.81694	12.105	10.4757	13.6801	yes	0.000658218	5.43072	12.0869	1.15423	1.59034
B4galt5	UDP-Gal:betaGlcNAc beta 1,4-galactosyltransferase, polypeptide 5	25.4245	25.1497	32.191	40.9551	33.275	47.8245	yes	0.000658218	27.5884	40.6849	0.56043	1.585
Rbms1	RNA binding motif, single stranded interacting protein 1	30.9702	33.1002	30.5567	42.8449	43.6373	49.8547	yes	0.00229676	31.5424	45.4456	0.526851	1.58455
Sh3pxd2a	SH3 and PX domains 2A	15.1183	21.6524	11.1856	26.5234	20.8584	31.4726	yes	0.000658218	15.9854	26.2848	0.717471	1.58414
Klk9	kallikrein related-peptidase 9	0.443054	0.727542	0.209006	0.201447	0.447376	10.3948	yes	0.000658218	0.459867	3.68121	3.00089	1.583
Zfp827	zinc finger protein 827	4.16239	3.84551	3.26663	9.19148	10.0184	9.32014	yes	0.000658218	3.75818	9.51001	1.33941	1.57907
Ptges3l	prostaglandin E synthase 3 like	2.0161	1.90012	2.67651	5.44983	7.57836	7.85105	yes	0.0217648	2.19758	6.95975	1.66312	1.5737
Pitpnm1	phosphatidylinositol transfer protein, membrane-associated 1	6.4242	6.70805	8.63528	15.581	14.073	14.1695	yes	0.000658218	7.25584	14.6078	1.00953	1.57233
Lpp	LIM domain containing preferred translocation partner in lipoma	7.76459	7.8192	7.63839	13.5617	15.3393	16.8932	yes	0.000658218	7.74073	15.2647	0.979661	1.56868
Dusp8	dual specificity phosphatase 8	2.68396	2.51344	3.04161	7.44729	6.85139	9.20651	yes	0.000658218	2.74634	7.83506	1.51244	1.56436
Mkl1	MKL (megakaryoblastic leukemia)/myocardin-like 1	17.379	14.3007	17.2505	27.755	24.2529	27.6317	yes	0.000658218	16.3101	26.5465	0.702761	1.56366
Slc27a3	solute carrier family 27 (fatty acid transporter), member 3	2.75272	4.62369	2.46146	11.5661	9.90607	4.56058	yes	0.000658218	3.27929	8.67758	1.40391	1.56116
Adcy9	adenylate cyclase 9	13.6068	14.0603	14.5587	25.2819	23.1996	22.3247	yes	0.000658218	14.0753	23.6021	0.745751	1.55205
Slc25a25	solute carrier family 25 (mitochondrial carrier, phosphate carrier), member 25	12.343	12.0289	13.1079	19.4976	20.8126	24.207	yes	0.000658218	12.4933	21.5057	0.783571	1.54565
Dagla	diacylglycerol lipase, alpha	0.877118	1.03286	1.20265	5.46446	3.98296	4.7569	yes	0.000658218	1.03754	4.73477	2.19012	1.53887
Fam214b	family with sequence similarity 214, member B	15.4435	14.581	16.0527	27.547	22.5733	25.1252	yes	0.000658218	15.3591	25.0818	0.707552	1.5289
BC022687	clathrin binding box of aftiphilin containing 1	13.4713	13.1533	18.7467	21.8581	19.941	32.5329	yes	0.000658218	15.1238	24.7773	0.712203	1.52825
Kcnk5	potassium channel, subfamily K, member 5	6.30165	8.43496	7.40037	14.2676	15.7299	13.5932	yes	0.000658218	7.37899	14.5302	0.977562	1.5278
Dnmt3a	DNA methyltransferase 3A	8.79719	8.74102	12.603	18.9247	17.698	17.8479	yes	0.000658218	10.0471	18.1569	0.85374	1.52706
Pfkp	phosphofructokinase, platelet	25.4202	31.3261	27.6724	38.9631	41.932	41.3825	yes	0.0477726	28.1396	40.7592	0.534526	1.52034
Ankrd13b	ankyrin repeat domain 13b	10.1193	12.4548	9.77442	23.5959	18.8388	14.8341	yes	0.000658218	10.7828	19.0896	0.82405	1.51983
Por	P450 (cytochrome) oxidoreductase	43.4573	39.2929	44.7912	54.4416	55.8644	62.863	yes	0.0105984	42.5138	57.723	0.441215	1.51912
Vwa5a	von Willebrand factor A domain containing 5A	58.1546	49.5194	58.5346	75.7437	60.1598	81.7839	yes	0.032708	55.4029	72.5625	0.389263	1.51691
Sema4c	sema domain, immunoglobulin domain (Ig), transmembrane domain (TM) and short cytoplasmic domain, (semaphorin) 4C	23.337	19.4204	17.9105	30.1957	29.6607	33.3624	yes	0.000658218	20.2226	31.0729	0.619688	1.51496
Ubald1	UBA-like domain containing 1	27.7409	20.5795	33.5283	43.4908	34.9791	40.3938	yes	0.0110021	27.2829	39.6212	0.538277	1.50845
Myo1e	myosin IE	37.2804	36.6783	43.9726	56.6003	49.8616	55.0782	yes	0.0081231	39.3104	53.8467	0.453946	1.50607
Rps6ka2	ribosomal protein S6 kinase, polypeptide 2	8.84213	7.18511	9.02531	14.818	17.7094	14.6938	yes	0.000658218	8.35085	15.7404	0.914477	1.50553
Aacs	acetoacetyl-CoA synthetase	52.9662	37.3363	49.1657	64.0349	65.1441	57.3037	yes	0.0214453	46.4894	62.1609	0.419106	1.50347
Acyp2	acylphosphatase 2, muscle type	8.65853	7.08933	6.48834	17.9687	13.7715	11.5454	yes	0.0387481	7.41207	14.4285	0.960977	1.50136
Krt25	keratin 25	9.25479	1.12025	0.367763	3.26627	0.0980501	23.2723	yes	0.00122911	3.58093	8.87887	1.31004	1.5009
Tnfrsf1a	tumor necrosis factor receptor superfamily, member 1a	40.9793	39.8894	38.1648	57.1847	53.4749	51.766	yes	0.010183	39.6778	54.1419	0.448411	1.49328
Tmem159	transmembrane protein 159	15.308	10.9729	15.542	25.1615	24.6946	19.1861	yes	0.00326971	13.941	23.0141	0.723185	1.49252
B4galt7	xylosylprotein beta1,4-galactosyltransferase, polypeptide 7 (galactosyltransferase I)	30.6065	23.7777	29.4867	40.6318	39.4155	40.717	yes	0.006476	27.957	40.2548	0.525952	1.48901
Eif2b2	eukaryotic translation initiation factor 2B, subunit 2 beta	43.9926	42.0333	44.349	61.2184	58.5495	55.4709	yes	0.0197309	43.4583	58.4129	0.426656	1.48166
Epcam	epithelial cell adhesion molecule	14.4652	13.2545	13.5991	17.6507	18.8132	31.6516	yes	0.000658218	13.7729	22.7052	0.721185	1.47892
Cpeb1	cytoplasmic polyadenylation element binding protein 1	59.3079	51.6696	58.0498	66.9012	78.5472	74.0162	yes	0.0423285	56.3424	73.1549	0.376732	1.47741
Pros1	protein S (alpha)	22.9442	20.9572	22.7034	38.1549	31.5578	29.8385	yes	0.000658218	22.2016	33.1837	0.579813	1.47567
Exoc6b	exocyst complex component 6B	16.1921	17.5078	14.5548	25.5654	25.2829	25.8681	yes	0.000658218	16.0849	25.5721	0.668866	1.46993
Tes	testis derived transcript	8.45572	8.24474	7.4415	16.4597	14.4146	14.4164	yes	0.000658218	8.04732	15.0969	0.907672	1.46535
Slc12a2	solute carrier family 12, member 2	9.88961	10.4509	8.72863	22.4169	15.7789	13.6961	yes	0.000658218	9.68971	17.2973	0.836021	1.46443
Cers5	ceramide synthase 5	47.4277	42.1606	51.4881	58.5205	60.4799	67.9104	yes	0.0254706	47.0255	62.3036	0.405873	1.46118
Snap47	synaptosomal-associated protein, 47	11.8798	10.6505	10.4962	17.334	20.3848	19.3095	yes	0.00122911	11.0088	19.0094	0.788054	1.46026
Dlgap4	DLG associated protein 4	33.9457	26.1473	38.0132	49.9173	44.8275	42.1249	yes	0.00563807	32.7021	45.6232	0.480387	1.45999
Vegfa	vascular endothelial growth factor A	11.8381	10.4788	10.1147	18.3643	21.4214	16.4371	yes	0.000658218	10.8105	18.7409	0.793755	1.45883
Osbp2	oxysterol binding protein 2	4.30612	3.27718	5.16391	7.68326	10.1879	11.166	yes	0.000658218	4.24907	9.67905	1.18772	1.45496
Dact3	dishevelled-binding antagonist of beta-catenin 3	1.41164	1.33113	1.56299	4.73688	6.23298	4.52443	yes	0.000658218	1.43525	5.16476	1.8474	1.45171
Il20ra	interleukin 20 receptor, alpha	0.0298264	0.164356	0.0944084	1.24971	2.3645	3.50879	yes	0.0147786	0.0961969	2.37433	4.62539	1.44939
Ablim1	actin-binding LIM protein 1	13.685	7.80216	5.40234	23.9178	11.3836	13.3721	yes	0.000658218	8.96317	16.2245	0.856094	1.44685
Slc41a2	solute carrier family 41, member 2	0.44235	0.316333	0.555648	3.44623	2.45416	3.62145	yes	0.000658218	0.43811	3.17395	2.85691	1.4395
Pkia	protein kinase inhibitor, alpha	2.04778	1.81074	1.66892	6.18617	6.8989	4.39973	yes	0.000658218	1.84248	5.82827	1.66142	1.43911
Adcy3	adenylate cyclase 3	5.84248	6.35756	4.60913	11.4504	11.2051	12.0209	yes	0.000658218	5.60306	11.5588	1.04471	1.43765
Ndrg1	N-myc downstream regulated gene 1	21.353	14.3356	25.7622	22.4485	23.5649	46.3072	yes	0.000658218	20.4836	30.7735	0.587221	1.43726
Stx3	syntaxin 3	13.5744	12.3042	13.6787	21.1473	21.1786	22.6434	yes	0.000658218	13.1858	21.6564	0.715814	1.43504
St3gal2	ST3 beta-galactoside alpha-2,3-sialyltransferase 2	7.43729	8.33703	8.23411	12.9935	11.7479	19.7876	yes	0.000658218	8.00281	14.843	0.891204	1.43108
Lmo2	LIM domain only 2	1.16539	1.17247	0.740906	5.05117	5.12353	2.8197	yes	0.000658218	1.02626	4.33147	2.07747	1.42794
Plxnb2	plexin B2	32.5776	35.06	38.2028	50.9882	48.3046	45.6404	yes	0.00896147	35.2801	48.3111	0.453498	1.42526
Arf2	ADP-ribosylation factor 2	32.0029	26.664	35.8435	46.7128	46.0442	38.8705	yes	0.00424048	31.5035	43.8758	0.477916	1.42504
Dync1li1	dynein cytoplasmic 1 light intermediate chain 1	54.3585	50.5934	52.1512	65.4642	67.1779	71.0732	yes	0.0423285	52.3677	67.9051	0.374843	1.41675
Rai14	retinoic acid induced 14	8.70499	7.59914	8.41711	17.8436	13.4738	13.8334	yes	0.000658218	8.24041	15.0503	0.869	1.41106
Myof	myoferlin	6.43294	11.3391	3.42363	16.0734	9.91964	14.3392	yes	0.000658218	7.06522	13.4441	0.928164	1.40853
Cdh2	cadherin 2	17.2495	14.5967	20.3061	29.3762	26.0255	24.7645	yes	0.000658218	17.3841	26.7221	0.620263	1.40606
Rnf145	ring finger protein 145	19.7102	19.3856	20.8529	28.2725	28.5671	32.8521	yes	0.000658218	19.9829	29.8972	0.581246	1.40378
Gpd1	glycerol-3-phosphate dehydrogenase 1 (soluble)	3.45762	5.35247	4.00669	8.77291	9.42449	10.2182	yes	0.000658218	4.27226	9.47187	1.14865	1.40253
Slc9a3r1	solute carrier family 9 (sodium/hydrogen exchanger), member 3 regulator 1	20.8114	18.7725	17.3263	35.5628	23.8553	26.4674	yes	0.00470227	18.9701	28.6285	0.593727	1.39994
Galns	galactosamine (N-acetyl)-6-sulfate sulfatase	9.35691	7.08801	8.45732	14.5783	14.1746	16.445	yes	0.000658218	8.30075	15.066	0.85998	1.39953
Sprr2b	small proline-rich protein 2B	3.79291	5.02683	5.4326	4.3923	4.27088	21.7922	yes	0.0458491	4.75078	10.1518	1.0955	1.39909
Dock3	dedicator of cyto-kinesis 3	0.802792	1.13572	1.12223	6.63097	3.79128	2.20519	yes	0.000658218	1.02025	4.20915	2.04461	1.39449
Rtn2	reticulon 2 (Z-band associated protein)	0.614023	0.393235	0.640736	4.30795	3.1818	2.28182	yes	0.00229676	0.549331	3.25719	2.56788	1.38791
Fhod1	formin homology 2 domain containing 1	6.99386	6.41924	8.01691	14.8161	14.1649	11.3254	yes	0.000658218	7.14334	13.4355	0.911376	1.38704
Kif16b	kinesin family member 16B	18.7961	15.9011	19.0978	25.9024	27.4562	28.3837	yes	0.000658218	17.9317	27.2474	0.603611	1.38596
Esyt1	extended synaptotagmin-like protein 1	44.9639	40.2043	51.8206	54.8092	58.6606	66.1909	yes	0.0303892	45.6629	59.8869	0.391217	1.3845
Asns	asparagine synthetase	14.0622	23.8808	11.7068	29.2835	27.1538	20.1513	yes	0.00470227	16.5499	25.5295	0.625342	1.38427
Me1	malic enzyme 1, NADP(+)-dependent, cytosolic	12.1091	18.3993	10.8736	22.2401	23.9889	19.9422	yes	0.000658218	13.794	22.0571	0.6772	1.38004
Phldb3	pleckstrin homology like domain, family B, member 3	51.1963	41.6486	57.1394	53.8653	51.7727	88.6647	yes	0.0450846	49.9948	64.7676	0.373494	1.379
Cd59a	CD59a antigen	13.3663	13.0496	12.3097	22.6289	18.7563	21.2461	yes	0.00229676	12.9085	20.8771	0.693596	1.37093
Zfand2b	zinc finger, AN1 type domain 2B	34.9149	30.8681	31.864	42.3925	50.4718	40.6094	yes	0.0469495	32.549	44.4912	0.450908	1.36059
Tbc1d16	TBC1 domain family, member 16	25.3077	23.014	33.0925	32.7577	37.4419	44.1784	yes	0.00470227	27.1381	38.126	0.490457	1.36013
Lama4	laminin, alpha 4	16.4377	17.3111	15.2243	25.1179	22.447	27.6213	yes	0.000658218	16.3244	25.0621	0.618478	1.35821
Arhgap39	Rho GTPase activating protein 39	10.0519	11.1732	8.77652	18.4266	16.4037	16.3681	yes	0.000658218	10.0005	17.0661	0.771058	1.3581
8430408G22Rik	DEPP1 autophagy regulator	0.914024	2.35557	0.318062	5.31402	4.61554	3.29523	yes	0.015118	1.19589	4.40826	1.88213	1.35697
Il33	interleukin 33	4.82147	14.6803	3.9487	11.1145	6.45274	24.9688	yes	0.000658218	7.81682	14.1787	0.859069	1.35649
Pgr	progesterone receptor	0.192727	0.0582972	0.147287	2.55727	2.84461	1.21652	yes	0.000658218	0.13277	2.20613	4.05451	1.35572
Cpa6	carboxypeptidase A6	0.19429	0.335817	0.110232	4.47662	1.0196	1.72868	yes	0.00177006	0.213446	2.4083	3.49607	1.35553
Gpr137b-ps	G protein-coupled receptor 137B, pseudogene	53.2458	37.445	63.0174	61.7721	68.9556	66.9306	yes	0.0485349	51.2361	65.8861	0.362814	1.35369
Rilp	Rab interacting lysosomal protein	1.75553	1.38159	1.38052	4.58917	5.15134	4.96277	yes	0.000658218	1.50588	4.90109	1.7025	1.34135
Tnfsf12	tumor necrosis factor (ligand) superfamily, member 12	7.275	6.12593	8.84863	12.8061	11.5337	16.3394	yes	0.00608033	7.41652	13.5597	0.870515	1.34132
C1qtnf6	C1q and tumor necrosis factor related protein 6	13.2024	10.8782	13.154	14.37	12.5988	33.1296	yes	0.00122911	12.4115	20.0328	0.690683	1.338
Fam219a	family with sequence similarity 219, member A	10.2057	9.91627	10.4115	18.2047	17.2869	16.0134	yes	0.00177006	10.1778	17.1683	0.754321	1.33678
Pvr	poliovirus receptor	16.8108	19.755	18.8376	27.19	27.3642	28.0247	yes	0.00280352	18.4678	27.5263	0.575799	1.33569
Adh7	alcohol dehydrogenase 7 (class IV), mu or sigma polypeptide	4.49553	9.08257	2.41886	8.85837	11.6536	11.5113	yes	0.000658218	5.33232	10.6744	1.00132	1.33524
Camk2d	calcium/calmodulin-dependent protein kinase II, delta	27.6379	26.9291	30.8706	36.1288	39.0202	43.2708	yes	0.00853522	28.4792	39.4733	0.470967	1.33369
Ascc3	activating signal cointegrator 1 complex subunit 3	10.4967	10.9443	10.3402	17.9752	15.7708	19.2397	yes	0.000658218	10.5937	17.6619	0.737429	1.3297
Smim3	small integral membrane protein 3	1.38783	2.30112	0.947729	4.00223	3.89103	6.88236	yes	0.000658218	1.54556	4.92521	1.67205	1.3286
Rassf8	Ras association (RalGDS/AF-6) domain family (N-terminal) member 8	22.8827	18.742	26.2354	31.9698	29.4393	36.0339	yes	0.0121266	22.62	32.481	0.521995	1.32843
Eng	endoglin	22.4823	26.3793	26.6572	32.5225	35.056	38.8745	yes	0.0214453	25.1729	35.4843	0.495309	1.32396
Slc35e4	solute carrier family 35, member E4	12.7548	12.8667	16.7162	22.7072	20.3834	23.1381	yes	0.000658218	14.1126	22.0762	0.645514	1.32381
2810468N07Rik	RIKEN cDNA 2810468N07 gene	23.5746	15.0521	22.4718	27.6157	29.6623	31.8279	yes	0.0173238	20.3662	29.702	0.544384	1.31938
Unc5b	unc-5 netrin receptor B	5.02608	5.21388	4.1235	8.4377	8.66602	12.3887	yes	0.000658218	4.78782	9.83081	1.03794	1.31897
Crem	cAMP responsive element modulator	9.39117	8.8705	8.97013	14.1599	14.2023	18.4742	yes	0.00177006	9.07727	15.6121	0.782338	1.31517
Akr1b10	aldo-keto reductase family 1, member B10 (aldose reductase)	19.4295	14.5474	17.5733	26.46	24.3632	26.3828	yes	0.0173238	17.1834	25.7353	0.582735	1.30539
Pde8a	phosphodiesterase 8A	25.9724	20.3439	24.2316	31.6091	31.7792	36.6711	yes	0.00771655	23.516	33.3531	0.504182	1.30446
Sgcd	sarcoglycan, delta (dystrophin-associated glycoprotein)	4.71427	7.60238	7.25565	18.8229	8.395	9.25633	yes	0.00771655	6.5241	12.1581	0.898064	1.30347
Tmem106a	transmembrane protein 106A	2.78563	3.3256	3.39586	7.36478	6.80396	8.0531	yes	0.000658218	3.16903	7.40728	1.2249	1.30323
Rgs9	regulator of G-protein signaling 9	0.150867	0.231006	0.301461	1.09137	1.87344	3.91615	yes	0.000658218	0.227778	2.29365	3.33195	1.30101
Slc37a3	solute carrier family 37 (glycerol-3-phosphate transporter), member 3	10.1385	10.1369	13.3089	19.1358	15.5042	20.0916	yes	0.000658218	11.1948	18.2439	0.704587	1.2992
Krt75	keratin 75	1.40978	0.583227	0.436887	7.62772	0.87335	2.02868	yes	0.000658218	0.809965	3.50992	2.11551	1.29903
Frrs1	ferric-chelate reductase 1	4.9227	8.81816	4.75547	15.5426	9.37287	10.0275	yes	0.00122911	6.16544	11.6477	0.917763	1.29893
Itpripl2	inositol 1,4,5-triphosphate receptor interacting protein-like 2	22.9618	21.955	30.7369	36.8459	29.6384	39.4817	yes	0.00326971	25.2179	35.322	0.486119	1.2986
Il6st	interleukin 6 signal transducer	22.7216	22.5287	21.6461	32.485	29.0253	34.0423	yes	0.000658218	22.2988	31.8509	0.514367	1.29807
Mras	muscle and microspikes RAS	10.2381	10.5464	12.8129	22.2044	16.6633	15.8452	yes	0.000658218	11.1991	18.2376	0.703531	1.29728
Tgfb1	transforming growth factor, beta 1	23.7256	17.5718	29.3157	32.3881	32.0616	35.4824	yes	0.0137049	23.5377	33.3107	0.501012	1.29619
Slc12a4	solute carrier family 12, member 4	18.4405	19.9385	21.7504	28.6165	27.799	30.9799	yes	0.000658218	20.0431	29.1318	0.539487	1.29607
Sprr2g	small proline-rich protein 2G	0.255018	1.84855	0.773478	0.01	0.327643	10.9946	yes	0.0359236	0.959015	3.77741	1.97777	1.29502
2900041M22Rik	RIKEN cDNA 2900041M22 gene	1.97735	0.877329	2.32669	4.78264	3.93515	6.56094	yes	0.00375207	1.72712	5.09291	1.56012	1.28882
Pag1	phosphoprotein associated with glycosphingolipid microdomains 1	0.988996	1.52246	0.616393	3.4489	3.47669	4.79561	yes	0.000658218	1.04262	3.90707	1.90588	1.28752
Dgkh	diacylglycerol kinase, eta	2.41386	2.65755	1.70393	6.6778	6.38533	4.75935	yes	0.000658218	2.25845	5.94083	1.39533	1.286
Dact1	dishevelled-binding antagonist of beta-catenin 1	23.9728	19.9049	27.5382	24.9117	39.0673	36.6043	yes	0.00229676	23.8053	33.5278	0.494074	1.28403
Slc6a15	solute carrier family 6 (neurotransmitter transporter), member 15	43.1169	33.391	39.1797	53.5726	61.7775	36.618	yes	0.0248438	38.5625	50.656	0.393534	1.28034
Mettl7a1	methyltransferase like 7A1	7.80225	7.96708	8.783	14.5752	14.6328	13.5169	yes	0.00326971	8.18411	14.2416	0.799217	1.27915
Atp6v0e2	ATPase, H+ transporting, lysosomal V0 subunit E2	34.6358	21.5769	32.1454	40.2086	43.4528	36.5894	yes	0.0238731	29.4527	40.0836	0.444612	1.27487
Otulin	OTU deubiquitinase with linear linkage specificity	28.1322	27.7094	29.9112	34.5635	39.7077	42.8613	yes	0.035617	28.5843	39.0442	0.449886	1.27193
Mfn2	mitofusin 2	26.4613	24.2633	31.9466	37.6117	39.4922	36.3647	yes	0.00771655	27.5571	37.8229	0.456836	1.26961
Lipa	lysosomal acid lipase A	22.4777	18.6639	24.0152	30.4265	27.3549	34.9702	yes	0.00608033	21.7189	30.9172	0.509456	1.26784
Comt	catechol-O-methyltransferase	22.6237	19.6252	23.7737	30.3116	30.6173	32.7263	yes	0.0339854	22.0075	31.2184	0.504399	1.26252
Pmaip1	phorbol-12-myristate-13-acetate-induced protein 1	1.19146	1.36164	1.16398	6.34555	2.79263	3.38202	yes	0.000658218	1.23903	4.1734	1.75202	1.2613
Mfsd6	major facilitator superfamily domain containing 6	8.51871	11.2019	8.10226	16.0707	17.4027	13.1838	yes	0.000658218	9.27429	15.5524	0.745828	1.26
Csrnp1	cysteine-serine-rich nuclear protein 1	6.74854	10.4627	7.73531	13.7382	10.5491	18.5704	yes	0.000658218	8.31552	14.2859	0.780714	1.25584
Sox8	SRY (sex determining region Y)-box 8	2.28868	1.19465	1.46795	5.1477	5.09257	4.30491	yes	0.000658218	1.65043	4.84839	1.55467	1.25446
Amigo1	adhesion molecule with Ig like domain 1	0.908672	0.854304	0.73133	3.86355	2.63565	3.72354	yes	0.000658218	0.831435	3.40758	2.03507	1.25123
Tbc1d2	TBC1 domain family, member 2	1.64038	2.86503	1.04599	5.41075	4.28573	5.79206	yes	0.000658218	1.85047	5.16285	1.48028	1.25077
Ampd3	adenosine monophosphate deaminase 3	7.7107	6.40967	6.84093	11.0442	9.82126	16.6631	yes	0.000658218	6.9871	12.5095	0.840261	1.25069
Tpm2	tropomyosin 2, beta	15.4262	27.3399	9.73502	20.8896	22.9104	33.225	yes	0.0121266	17.5004	25.675	0.552979	1.24408
2210408F21Rik	RIKEN cDNA 2210408F21 gene	4.1482	2.10691	3.55483	6.27594	7.89533	7.76855	yes	0.0497378	3.26998	7.31327	1.16124	1.24287
Adamts14	a disintegrin-like and metallopeptidase (reprolysin type) with thrombospondin type 1 motif, 14	1.09067	1.82805	1.14841	4.95463	3.77707	4.19066	yes	0.000658218	1.35571	4.30745	1.66779	1.24036
Gatm	glycine amidinotransferase (L-arginine:glycine amidinotransferase)	0.391283	0.683963	0.827056	3.36426	3.57505	2.03498	yes	0.000658218	0.634101	2.99143	2.23805	1.23804
Lama3	laminin, alpha 3	5.95387	11.2582	8.63359	16.2837	13.4487	13.9771	yes	0.000658218	8.61522	14.5698	0.758025	1.23666
Pter	phosphotriesterase related	6.6539	6.3006	7.74941	11.2593	11.3571	14.289	yes	0.00936199	6.9013	12.3018	0.833929	1.23239
Crim1	cysteine rich transmembrane BMP regulator 1 (chordin like)	4.17954	4.69538	4.29529	10.0815	7.26153	9.18259	yes	0.000658218	4.39007	8.84187	1.01011	1.22384
Cpeb4	cytoplasmic polyadenylation element binding protein 4	23.4617	18.9207	21.8002	33.1744	27.7836	29.3854	yes	0.00326971	21.3942	30.1145	0.493237	1.21504
Snx24	sorting nexing 24	1.13921	2.07358	0.952935	6.72233	4.30388	1.80332	yes	0.00177006	1.38858	4.27651	1.62283	1.21334
Mical2	microtubule associated monooxygenase, calponin and LIM domain containing 2	2.05679	2.89635	1.36294	6.8391	4.38268	5.06839	yes	0.000658218	2.10536	5.43006	1.3669	1.21115
Fam69b	family with sequence similarity 69, member B	1.03183	1.90478	0.687856	3.60449	3.4529	4.77192	yes	0.00424048	1.20816	3.9431	1.70653	1.20501
Sh3bp5	SH3-domain binding protein 5 (BTK-associated)	3.86055	3.89563	4.98532	8.81594	7.43457	9.40957	yes	0.000658218	4.24717	8.55336	1.00999	1.20359
Slc24a3	solute carrier family 24 (sodium/potassium/calcium exchanger), member 3	4.02641	5.19245	3.60611	7.41751	7.28477	11.07	yes	0.000658218	4.27499	8.59076	1.00686	1.20321
Zfp52	zinc finger protein 52	2.52087	2.17819	1.98945	6.99886	5.09232	4.65745	yes	0.000658218	2.2295	5.58288	1.32429	1.19975
Samd4	sterile alpha motif domain containing 4	1.86136	1.25781	0.901274	3.94513	3.38441	5.11459	yes	0.000658218	1.34015	4.14804	1.63004	1.19858
St6galnac4	ST6 (alpha-N-acetyl-neuraminyl-2,3-beta-galactosyl-1,3)-N-acetylgalactosaminide alpha-2,6-sialyltransferase 4	0.668927	0.957899	0.9521	4.38587	2.59604	2.93281	yes	0.000658218	0.859642	3.30491	1.9428	1.19823
Nudt18	nudix (nucleoside diphosphate linked moiety X)-type motif 18	9.66051	7.04038	10.6545	14.6661	13.4631	16.8613	yes	0.000658218	9.11846	14.9968	0.717795	1.19705
Prelp	proline arginine-rich end leucine-rich repeat	13.4349	10.0436	15.8977	17.5828	20.317	22.1409	yes	0.000658218	13.1254	20.0136	0.608617	1.19656
Padi2	peptidyl arginine deiminase, type II	31.5443	22.5638	31.4502	30.3289	30.2431	54.2806	yes	0.0190475	28.5194	38.2842	0.424804	1.19471
Umps	uridine monophosphate synthetase	9.26637	8.88974	8.46459	15.6313	12.9642	15.4093	yes	0.000658218	8.87357	14.6683	0.725112	1.19429
Cmip	c-Maf inducing protein	16.5155	15.0294	14.1603	21.1494	22.5778	23.9836	yes	0.000658218	15.2351	22.5703	0.567028	1.19299
4833419F23Rik	RIKEN cDNA 4833419F23 gene	0.752918	0.787091	1.29292	3.45887	4.04617	2.81607	yes	0.0110021	0.94431	3.44037	1.86523	1.19203
Mir22hg	Mir22 host gene (non-protein coding)	19.5161	21.5162	15.9124	27.5679	27.6751	25.9457	yes	0.0203775	18.9816	27.0629	0.511717	1.19095
Arfgap3	ADP-ribosylation factor GTPase activating protein 3	12.3952	9.0299	15.7619	21.2161	17.6214	18.3831	yes	0.00375207	12.3957	19.0735	0.621736	1.19041
Zmiz1	zinc finger, MIZ-type containing 1	15.133	14.5679	14.834	23.6715	21.0715	21.4879	yes	0.000658218	14.845	22.077	0.572568	1.19019
Cse1l	chromosome segregation 1-like (S. cerevisiae)	27.6457	30.1818	25.6053	38.8305	37.3189	36.0984	yes	0.0121266	27.8109	37.4159	0.428001	1.18928
Btc	betacellulin, epidermal growth factor family member	0.588087	0.377687	0.533945	3.17981	2.58524	1.99796	yes	0.000658218	0.499906	2.58767	2.37192	1.18815
Inppl1	inositol polyphosphate phosphatase-like 1	15.7267	13.528	16.9224	25.0494	22.4492	20.6721	yes	0.000658218	15.3924	22.7236	0.561974	1.18747
Antxr1	anthrax toxin receptor 1	10.1224	10.6041	10.1279	16.4743	17.5456	15.2191	yes	0.000658218	10.2848	16.413	0.674325	1.18603
Rgs16	regulator of G-protein signaling 16	0.764321	0.472765	0.501316	2.9819	2.65124	2.57929	yes	0.000658218	0.579467	2.73748	2.24005	1.18491
S1pr1	sphingosine-1-phosphate receptor 1	0.0993114	0.137447	0.221025	1.77231	1.8207	1.83345	yes	0.00122911	0.152594	1.80882	3.56727	1.18259
Ubr4	ubiquitin protein ligase E3 component n-recognin 4	19.1817	19.0477	19.9787	29.2697	25.2159	28.0098	yes	0.00470227	19.4027	27.4985	0.503094	1.18213
Ate1	arginyltransferase 1	12.6023	12.4985	12.3092	19.8674	18.5119	18.9456	yes	0.000658218	12.47	19.1083	0.615738	1.18131
Hs2st1	heparan sulfate 2-O-sulfotransferase 1	20.7669	21.0717	21.9685	30.2251	28.6278	30.2456	yes	0.006476	21.269	29.6995	0.481684	1.18087
Gm4980	predicted gene 4980	1.34681	0.575657	1.8577	2.90816	3.55644	5.40045	yes	0.000658218	1.26006	3.95502	1.6502	1.18011
Morn4	MORN repeat containing 4	10.1167	7.33564	10.8519	13.8843	14.7652	17.239	yes	0.00771655	9.43475	15.2962	0.697114	1.17864
Tnfaip2	tumor necrosis factor, alpha-induced protein 2	0.549849	1.15474	0.344835	3.1967	1.79814	3.74098	yes	0.000658218	0.683141	2.91194	2.09172	1.17548
B4galt2	UDP-Gal:betaGlcNAc beta 1,4- galactosyltransferase, polypeptide 2	3.90665	5.2194	4.47679	8.23865	7.84531	10.3899	yes	0.000658218	4.53428	8.82462	0.960661	1.17383
Ncoa7	nuclear receptor coactivator 7	12.6073	11.7337	9.98839	18.1337	17.2014	18.0262	yes	0.000658218	11.4431	17.7871	0.63635	1.1734
Sertad2	SERTA domain containing 2	11.1834	12.0709	10.7231	17.3695	17.7029	17.8468	yes	0.000658218	11.3258	17.6397	0.639216	1.17317
D630024D03Rik	RIKEN cDNA D630024D03 gene	0.536476	0.514735	0.347245	1.87428	1.77386	3.72534	yes	0.0121266	0.466152	2.45783	2.39851	1.16475
Gm5478	predicted pseudogene 5478	0.529387	1.8876	0.9061	0.253007	0.281271	10.3506	yes	0.000658218	1.1077	3.62829	1.71173	1.15824
Naa25	N(alpha)-acetyltransferase 25, NatB auxiliary subunit	15.6077	19.4912	13.5312	24.5067	23.5061	22.4968	yes	0.00326971	16.21	23.5032	0.53597	1.15731
Fam161a	family with sequence similarity 161, member A	2.46526	2.18698	3.48684	5.0726	4.85998	8.54711	yes	0.00326971	2.71303	6.1599	1.183	1.15716
Trp53inp2	transformation related protein 53 inducible nuclear protein 2	26.6977	23.7085	29.3375	34.3905	33.3961	39.2962	yes	0.0140569	26.5812	35.6943	0.425284	1.15479
Pkp2	plakophilin 2	0.751878	0.751185	1.29427	4.29453	2.36085	3.26195	yes	0.00122911	0.932444	3.30578	1.8259	1.15283
Krt73	keratin 73	0.230501	0.913356	0.0456204	2.64217	0.0724967	4.12543	yes	0.000658218	0.396492	2.28003	2.52369	1.1513
Shroom1	shroom family member 1	0.360985	0.665235	0.258442	2.31168	2.53753	2.16902	yes	0.000658218	0.428221	2.33941	2.44972	1.14881
Ccnb2	cyclin B2	8.16832	9.74717	4.83793	13.2019	10.8895	14.1692	yes	0.0169706	7.58447	12.7535	0.749776	1.14619
Syt11	synaptotagmin XI	1.33613	1.85526	1.22928	4.05572	3.91442	4.64059	yes	0.000658218	1.47356	4.20358	1.51231	1.14578
Hyal1	hyaluronoglucosaminidase 1	8.72233	12.8091	10.8332	15.2627	16.3513	18.7508	yes	0.00563807	10.7882	16.7883	0.637998	1.14258
6430706D22Rik	Holliday junction recognition protein	10.9596	10.7091	6.48753	16.9901	11.7026	16.4008	yes	0.0162666	9.38541	15.0312	0.679465	1.14256
Ptch1	patched 1	12.5352	15.4067	13.7068	18.5445	24.5829	18.6396	yes	0.00177006	13.8829	20.589	0.568565	1.14219
Tbc1d9	TBC1 domain family, member 9	0.419538	0.841997	0.579673	4.35056	2.06499	1.65267	yes	0.000658218	0.613736	2.68941	2.1316	1.14208
Tbc1d1	TBC1 domain family, member 1	17.6851	14.6931	14.2359	24.0639	22.1522	21.5494	yes	0.00122911	15.538	22.5885	0.539785	1.14184
Wfdc3	WAP four-disulfide core domain 3	0.920541	1.35585	0.850503	6.56936	2.11276	1.67574	yes	0.0203775	1.0423	3.45262	1.72792	1.13688
Plxnb1	plexin B1	3.0349	6.13041	2.17598	9.46781	7.01611	6.36297	yes	0.000658218	3.78043	7.61563	1.01041	1.13608
Fam71f1	family with sequence similarity 71, member F1	8.60417	11.491	5.37187	13.5045	11.4099	16.6558	yes	0.0194098	8.48901	13.8567	0.706918	1.13551
Klk6	kallikrein related-peptidase 6	5.17595	7.00808	1.22612	4.74719	6.16916	14.7559	yes	0.0147786	4.47005	8.55742	0.936884	1.13244
Ldlrap1	low density lipoprotein receptor adaptor protein 1	21.5483	23.8387	24.2042	31.0441	30.191	33.4905	yes	0.0180095	23.1971	31.5752	0.444849	1.13205
Hpgds	hematopoietic prostaglandin D synthase	13.7431	17.1272	14.9705	25.464	23.4641	17.6434	yes	0.00470227	15.2803	22.1905	0.538272	1.12888
Rtkn	rhotekin	24.0951	29.2735	23.1958	33.7911	35.3071	33.6271	yes	0.0290654	25.5215	34.2418	0.424046	1.12801
Npr2	natriuretic peptide receptor 2	13.0293	11.7116	14.9777	21.5591	18.9169	18.6549	yes	0.00122911	13.2395	19.7103	0.574097	1.12727
Nlrc4	NLR family, CARD domain containing 4	0.185166	0.1498	0.221208	1.58419	2.22618	1.44753	yes	0.000658218	0.185391	1.75263	3.24088	1.12579
Gss	glutathione synthetase	18.0071	18.0755	15.5621	24.9108	26.7538	21.7768	yes	0.0203775	17.2149	24.4805	0.507973	1.12519
Cdc14b	CDC14 cell division cycle 14B	4.98996	5.22243	4.97751	9.01777	9.44475	9.52644	yes	0.000658218	5.0633	9.32965	0.881746	1.12456
Reep1	receptor accessory protein 1	3.52521	0.67056	1.21736	6.15955	5.44026	2.37219	yes	0.000658218	1.80438	4.65733	1.368	1.12233
Shc3	src homology 2 domain-containing transforming protein C3	2.11319	1.67879	1.66297	4.75354	3.99916	5.25865	yes	0.00518114	1.81832	4.67045	1.36096	1.11967
Itga7	integrin alpha 7	2.79166	3.15954	2.64552	8.07125	3.96244	6.66296	yes	0.000658218	2.86557	6.23222	1.12092	1.11617
Lef1	lymphoid enhancer binding factor 1	10.069	5.90439	10.4012	12.9779	15.464	13.9244	yes	0.00122911	8.79153	14.1221	0.683768	1.11359
St6galnac6	ST6 (alpha-N-acetyl-neuraminyl-2,3-beta-galactosyl-1,3)-N-acetylgalactosaminide alpha-2,6-sialyltransferase 6	4.60116	3.7409	5.77385	9.91737	8.26045	8.1161	yes	0.00177006	4.7053	8.76464	0.897407	1.10604
Chpf2	chondroitin polymerizing factor 2	16.6497	17.7066	18.4304	26.0096	21.671	26.7027	yes	0.00375207	17.5956	24.7944	0.494804	1.10569
Rab31	RAB31, member RAS oncogene family	27.6843	22.3293	28.9209	34.9233	34.5067	35.4634	yes	0.0203775	26.3115	34.9645	0.410196	1.1054
Kcnn2	potassium intermediate/small conductance calcium-activated channel, subfamily N, member 2	0.945796	0.840337	0.482706	3.66291	3.30214	1.59977	yes	0.00122911	0.75628	2.85494	1.91647	1.10437
Uso1	USO1 vesicle docking factor	34.2597	31.7495	33.6604	45.516	40.0452	42.98	yes	0.045332	33.2232	42.8471	0.367005	1.10342
Pdia5	protein disulfide isomerase associated 5	2.06724	2.16685	2.26826	6.71461	3.17795	5.55639	yes	0.00375207	2.16745	5.14965	1.24848	1.10247
Jam3	junction adhesion molecule 3	2.7691	2.32176	2.81837	5.3372	5.97017	6.22309	yes	0.00375207	2.63641	5.84349	1.14825	1.10132
Slc5a3	solute carrier family 5 (inositol transporters), member 3	2.26076	2.64069	3.51256	6.46191	4.96647	6.8338	yes	0.000658218	2.80467	6.08739	1.11799	1.10086
Trerf1	transcriptional regulating factor 1	7.00816	6.23464	7.15274	10.6476	9.98705	13.8909	yes	0.00122911	6.79851	11.5085	0.759411	1.10081
Akap1	A kinase (PRKA) anchor protein 1	11.954	12.1649	10.9061	19.0241	17.4207	16.4155	yes	0.00122911	11.675	17.6201	0.5938	1.0984
Ptp4a1	protein tyrosine phosphatase 4a1	6.38498	6.73901	7.26182	9.52129	11.8959	13.0373	yes	0.000658218	6.79527	11.4848	0.757127	1.09684
Frmd3	FERM domain containing 3	0.305473	0.144321	0.118387	1.37144	2.375	1.33759	yes	0.000658218	0.189394	1.69468	3.16155	1.09665
Slc38a7	solute carrier family 38, member 7	14.1793	13.505	18.6722	22.3051	20.7501	23.4827	yes	0.0073311	15.4522	22.1793	0.521405	1.09662
Slc2a3	solute carrier family 2 (facilitated glucose transporter), member 3	0.746609	0.766406	0.642337	3.18357	2.52868	2.56836	yes	0.000658218	0.718451	2.7602	1.94181	1.09471
Upp1	uridine phosphorylase 1	1.06875	0.949923	0.923345	2.75024	2.23734	4.69004	yes	0.006476	0.980673	3.22587	1.71785	1.09469
Plcd1	phospholipase C, delta 1	9.36551	11.1882	10.0407	18.0558	14.8932	14.3421	yes	0.00280352	10.1981	15.7637	0.628301	1.0923
Iqsec1	IQ motif and Sec7 domain 1	6.19402	5.87855	6.902	12.6955	11.5415	8.30942	yes	0.000658218	6.32486	10.8488	0.778432	1.09166
Azin2	antizyme inhibitor 2	5.19044	4.46253	5.27921	9.48213	8.09787	9.59709	yes	0.006476	4.97739	9.05903	0.863966	1.08945
Ston1	stonin 1	2.14036	1.70443	2.05405	5.77061	5.12211	3.49815	yes	0.000658218	1.96628	4.79696	1.28665	1.08846
C430002N11Rik	RIKEN cDNA C430002N11 gene	0.203178	0.1049	0.0724601	1.03276	0.698907	2.82839	yes	0.000658218	0.126846	1.52002	3.58294	1.08562
Maff	v-maf musculoaponeurotic fibrosarcoma oncogene family, protein F (avian)	3.01247	4.54266	3.5587	7.20458	5.01134	9.67083	yes	0.00326971	3.70461	7.29558	0.977702	1.08271
Zbtb38	zinc finger and BTB domain containing 38	20.7562	23.1756	18.1589	25.9977	26.9746	31.8455	yes	0.0140569	20.6969	28.2726	0.44999	1.08258
Col27a1	collagen, type XXVII, alpha 1	0.052768	0.314796	0.265104	1.63805	1.12352	2.3716	yes	0.000658218	0.210889	1.71106	3.02033	1.0821
Pkd1	polycystin 1, transient receptor poteintial channel interacting	12.2334	13.5137	13.0792	20.0779	18.7669	18.2095	yes	0.0140569	12.9421	19.0181	0.555301	1.07476
Zfp346	zinc finger protein 346	12.3804	11.2727	14.3158	18.9706	17.7752	19.2139	yes	0.00229676	12.6563	18.6532	0.55957	1.07174
Fosl2	fos-like antigen 2	6.9801	9.34754	7.1145	11.1318	11.1659	15.6376	yes	0.000658218	7.81405	12.6451	0.694437	1.06807
Agtr1a	angiotensin II receptor, type 1a	1.24222	4.61907	0.898639	3.88089	3.59986	8.00394	yes	0.00229676	2.25331	5.16156	1.19576	1.06802
Slit2	slit guidance ligand 2	1.99336	0.189148	1.39388	2.04609	3.44388	5.01525	yes	0.000658218	1.19213	3.50174	1.55453	1.06604
Pde11a	phosphodiesterase 11A	0.084905	0.176151	0.0337227	2.56622	1.25309	0.391766	yes	0.00518114	0.0982596	1.40369	3.83648	1.06519
Gcnt1	glucosaminyl (N-acetyl) transferase 1, core 2	11.0016	10.2759	8.36654	14.6142	14.305	16.714	yes	0.000658218	9.88135	15.2111	0.622342	1.06398
Zbtb4	zinc finger and BTB domain containing 4	19.0956	14.765	20.3869	24.246	20.979	29.9787	yes	0.00691313	18.0825	25.0679	0.471247	1.06341
Rapgef3	Rap guanine nucleotide exchange factor (GEF) 3	1.19946	2.26679	0.966308	4.82215	4.29847	2.73932	yes	0.000658218	1.47752	3.95331	1.41989	1.06238
Nat6	N(alpha)-acetyltransferase 80, NatH catalytic subunit	15.2262	15.4405	17.5902	21.0113	19.7574	27.3012	yes	0.0290654	16.0856	22.69	0.496282	1.0606
Tchh	trichohyalin	3.46009	0.637758	0.461744	2.17937	0.674739	9.17977	yes	0.000658218	1.51986	4.01129	1.40013	1.05935
Pcnx	pecanex homolog	13.9648	13.4691	12.6288	18.7038	19.3412	20.1649	yes	0.00229676	13.3542	19.4033	0.539005	1.0569
Fndc3a	fibronectin type III domain containing 3A	17.0852	16.8259	17.1058	25.629	22.8271	22.7	yes	0.00280352	17.0056	23.7187	0.480012	1.05195
Ptpn13	protein tyrosine phosphatase, non-receptor type 13	11.9663	14.4317	10.1766	17.0686	17.3295	19.4354	yes	0.000658218	12.1915	17.9445	0.557662	1.04797
Col14a1	collagen, type XIV, alpha 1	0.152524	0.22465	0.0286656	0.121264	0.0674426	4.17535	yes	0.000658218	0.13528	1.45469	3.42669	1.04637
Gpr89	G protein-coupled receptor 89	17.3308	15.4916	18.7658	19.2487	24.9691	27.4925	yes	0.0412604	17.1961	23.9034	0.475139	1.04625
Chac1	ChaC, cation transport regulator 1	0.164822	0.112934	0.0648835	2.01241	1.14345	1.04891	yes	0.030694	0.114213	1.40159	3.61726	1.04565
Ppp2r2a	protein phosphatase 2, regulatory subunit B, alpha	8.41091	11.2633	8.15791	15.097	15.1369	12.8094	yes	0.00122911	9.27737	14.3478	0.629038	1.04317
Ppp1r18	protein phosphatase 1, regulatory subunit 18	22.1314	21.0723	25.2847	32.0489	29.3577	29.903	yes	0.030694	22.8295	30.4365	0.414907	1.0423
Prss12	protease, serine 12 neurotrypsin (motopsin)	17.7087	10.9432	16.2044	15.9262	20.844	26.8885	yes	0.0137049	14.9521	21.2196	0.505047	1.0421
Pknox2	Pbx/knotted 1 homeobox 2	1.37449	0.882832	1.70778	2.91192	2.83967	5.16288	yes	0.000658218	1.3217	3.63816	1.46081	1.04013
Racgap1	Rac GTPase-activating protein 1	7.71904	10.6496	5.40833	13.7995	10.726	13.3883	yes	0.00280352	7.92566	12.6379	0.673158	1.03916
Map3k8	mitogen-activated protein kinase kinase kinase 8	1.82853	2.15499	1.23774	5.07285	3.21759	4.56622	yes	0.000658218	1.74042	4.28555	1.30005	1.0368
Gramd3	GRAM domain containing 3	6.07929	5.84767	5.93786	10.6528	9.78436	9.88832	yes	0.00326971	5.95494	10.1085	0.763409	1.03634
Nsf	N-ethylmaleimide sensitive fusion protein	19.8734	20.2861	19.3368	28.1442	27.1463	25.4254	yes	0.0129405	19.8321	26.9053	0.440053	1.03463
Adamts6	a disintegrin-like and metallopeptidase (reprolysin type) with thrombospondin type 1 motif, 6	0.0728203	0.354015	0.0580824	1.99742	1.85628	0.621425	yes	0.000658218	0.161639	1.49171	3.20612	1.03441
Pdcd10	programmed cell death 10	17.4308	16.6471	15.8173	24.4605	23.5119	21.4952	yes	0.0404412	16.6317	23.1559	0.477439	1.03431
Ccdc109b	Coiled-coil domain containing 109B	1.30141	2.1376	0.714055	5.93432	2.72818	2.49978	yes	0.0254706	1.38436	3.72076	1.42638	1.03406
Azin1	antizyme inhibitor 1	23.7584	24.5507	21.4315	31.6664	30.0154	30.8469	yes	0.0214453	23.2469	30.8429	0.407902	1.03283
Ndrg4	N-myc downstream regulated gene 4	3.8538	3.13635	4.51956	9.10315	6.96233	5.7647	yes	0.00122911	3.83657	7.27673	0.923473	1.03195
Avil	advillin	0.198341	0.137254	0.0315307	1.27693	0.747169	2.1407	yes	0.00326971	0.122375	1.38827	3.5039	1.02995
Acaca	acetyl-Coenzyme A carboxylase alpha	7.25052	7.545	7.56863	12.3876	11.6522	11.9498	yes	0.000658218	7.45472	11.9965	0.686392	1.02981
Usp33	ubiquitin specific peptidase 33	28.0377	25.1602	24.3681	32.9376	36.5989	31.7645	yes	0.035617	25.8553	33.767	0.385152	1.02462
Echdc3	enoyl Coenzyme A hydratase domain containing 3	4.65131	3.65281	5.85345	9.63646	8.63474	7.03158	yes	0.015118	4.71919	8.43426	0.837722	1.02435
Plekhf1	pleckstrin homology domain containing, family F (with FYVE domain) member 1	8.72382	7.9118	9.74514	20.2431	8.64657	12.0427	yes	0.0375068	8.79359	13.6441	0.633756	1.024
Dot1l	DOT1-like, histone H3 methyltransferase (S. cerevisiae)	14.5131	16.0762	16.3929	23.5728	22.9578	19.2554	yes	0.00470227	15.6607	21.9287	0.485666	1.02233
Qsox1	quiescin Q6 sulfhydryl oxidase 1	20.0718	23.592	25.4274	28.4722	29.8039	33.2449	yes	0.0415471	23.0304	30.507	0.405601	1.02182
Zscan2	zinc finger and SCAN domain containing 2	0.99821	1.2281	1.28255	3.72448	3.66422	2.60166	yes	0.00229676	1.16962	3.33012	1.50953	1.0185
Smad3	SMAD family member 3	6.68694	6.80492	6.40589	12.1126	11.3869	9.18563	yes	0.000658218	6.63258	10.895	0.716029	1.01812
Dpysl2	dihydropyrimidinase-like 2	10.62	7.9883	16.1928	15.9513	13.7327	21.3982	yes	0.00177006	11.6004	17.0274	0.553688	1.01431
Skap2	src family associated phosphoprotein 2	10.7443	10.1655	9.39365	14.467	14.0906	16.9758	yes	0.0422148	10.1011	15.1778	0.587443	1.00971
Bin1	bridging integrator 1	10.0483	7.26615	10.1746	16.3353	12.3282	13.3906	yes	0.0137049	9.16302	14.018	0.613389	1.00838
Inpp5f	inositol polyphosphate-5-phosphatase F	21.5127	20.9026	18.2116	28.1515	27.5906	25.6575	yes	0.0177102	20.209	27.1332	0.425064	1.00635
Trak1	trafficking protein, kinesin binding 1	16.9659	17.2306	19.1967	25.0754	22.2744	25.6125	yes	0.0147786	17.7977	24.3208	0.450495	1.00511
Trim2	tripartite motif-containing 2	8.24433	8.88115	7.13092	12.4893	11.8352	13.6356	yes	0.000658218	8.08547	12.6534	0.646118	1.00305
Gja3	gap junction protein, alpha 3	1.45805	1.41694	1.12125	3.52516	3.49226	3.6215	yes	0.00229676	1.33208	3.54631	1.41264	1.0025
Ccsap	centriole, cilia and spindle associated protein	2.38726	1.44551	2.0936	4.60013	4.17073	4.80815	yes	0.00326971	1.97546	4.52634	1.19616	1.0004
Dnajc12	DnaJ heat shock protein family (Hsp40) member C12	4.52041	4.03856	4.39707	5.32615	9.26205	8.79917	yes	0.045332	4.31868	7.79579	0.852105	0.999002
Krt42	keratin 42	0.83831	0.746477	0.263923	1.47608	5.44651	0.0592689	yes	0.0081231	0.616237	2.32729	1.91709	0.997307
Krt71	keratin 71	10.609	1.6904	0.76774	1.4528	0.143506	21.914	yes	0.0235507	4.35571	7.83677	0.84735	0.99693
Zfp467	zinc finger protein 467	1.5036	1.45398	1.78342	4.73168	4.44613	2.56667	yes	0.000658218	1.58033	3.91483	1.30872	0.99587
Dtnb	dystrobrevin, beta	5.69839	8.46877	6.07573	11.0922	12.1318	9.58112	yes	0.00896147	6.74763	10.935	0.696506	0.995799
Raph1	Ras association (RalGDS/AF-6) and pleckstrin homology domains 1	11.0201	9.90591	8.41105	15.4584	16.2216	12.3727	yes	0.000658218	9.77902	14.6842	0.586506	0.991747
Rbpms2	RNA binding protein with multiple splicing 2	8.69483	7.02036	9.28292	13.5601	13.4102	11.7273	yes	0.0217648	8.3327	12.8992	0.630425	0.991034
Slc25a37	solute carrier family 25, member 37	7.03988	9.1401	6.61458	12.3969	11.8673	11.6802	yes	0.000658218	7.59819	11.9815	0.657077	0.990596
Tmed5	transmembrane p24 trafficking protein 5	23.2563	23.7198	21.3515	32.0913	26.8375	30.9185	yes	0.0380618	22.7759	29.9491	0.395007	0.987886
Endod1	endonuclease domain containing 1	22.9294	22.5301	22.0624	29.0835	30.6962	29.1115	yes	0.0320922	22.5073	29.6304	0.396685	0.986491
Josd1	Josephin domain containing 1	11.2184	11.8885	13.9348	17.6855	18.0307	17.5126	yes	0.006476	12.3472	17.7429	0.523057	0.983638
Chst2	carbohydrate sulfotransferase 2	0.111342	0.271007	0.148204	1.95441	0.534759	1.75614	yes	0.000658218	0.176851	1.4151	3.0003	0.981395
Napb	N-ethylmaleimide sensitive fusion protein attachment protein beta	2.21812	2.47361	2.25238	5.24156	5.72749	3.90616	yes	0.000658218	2.3147	4.9584	1.09905	0.980285
Mpp6	membrane protein, palmitoylated 6 (MAGUK p55 subfamily member 6)	16.1019	17.8665	16.292	23.9136	22.2752	22.5922	yes	0.0380618	16.7535	22.927	0.452588	0.980044
Lamb3	laminin, beta 3	6.94472	13.0894	4.10638	13.0554	12.564	11.7561	yes	0.000658218	8.04683	12.4585	0.630637	0.974247
Arhgap42	Rho GTPase activating protein 42	4.88161	5.18225	4.97108	9.93299	8.76531	7.11351	yes	0.000658218	5.01165	8.60394	0.779712	0.973539
Me2	malic enzyme 2, NAD(+)-dependent, mitochondrial	12.7722	14.1906	12.9777	19.0439	19.2538	18.1554	yes	0.0248438	13.3135	18.8177	0.4992	0.971026
Prkcg	protein kinase C, gamma	1.14291	1.47555	0.827491	3.5666	3.97631	1.90683	yes	0.000658218	1.14865	3.14991	1.45537	0.965256
Pdzrn4	PDZ domain containing RING finger 4	1.88205	0.781116	0.923676	3.7783	2.95296	2.90908	yes	0.000658218	1.19561	3.21345	1.42637	0.960975
Kcnab2	potassium voltage-gated channel, shaker-related subfamily, beta member 2	0.748653	0.667603	0.584929	2.04609	2.96688	1.97654	yes	0.000658218	0.667062	2.32984	1.80434	0.9605
Zfp281	zinc finger protein 281	6.71311	7.83836	7.28764	11.0414	11.3944	11.8627	yes	0.000658218	7.2797	11.4328	0.651231	0.960084
Trim7	tripartite motif-containing 7	1.16379	2.84783	1.82663	5.02137	4.41068	3.62938	yes	0.0241471	1.94608	4.35381	1.1617	0.959269
Mrgprf	MAS-related GPR, member F	0.249519	0.558224	0.295992	2.8266	2.08072	0.397758	yes	0.00326971	0.367912	1.76836	2.26498	0.958161
Slc16a11	solute carrier family 16 (monocarboxylic acid transporters), member 11	0.86978	1.74222	0.629113	3.12423	1.91793	4.00154	yes	0.0140569	1.08037	3.01457	1.48042	0.955821
Mtmr11	myotubularin related protein 11	2.90522	3.57131	2.49552	6.95476	6.40667	4.12444	yes	0.00326971	2.99068	5.82862	0.96268	0.955622
Serpinb7	serine (or cysteine) peptidase inhibitor, clade B, member 7	3.70808	3.81337	1.90026	6.62636	8.37153	3.07548	yes	0.018354	3.14057	6.02446	0.939805	0.952602
Gm19510	predicted gene, 19510	0.203597	0.233287	0.375235	1.84643	1.58124	1.24946	yes	0.00563807	0.270706	1.55904	2.52586	0.952431
Kalrn	kalirin, RhoGEF kinase	0.635487	0.678954	0.590198	2.63116	2.0173	2.08859	yes	0.000658218	0.63488	2.24568	1.8226	0.949082
Epb4.1l4a	erythrocyte membrane protein band 4.1 like 4a	11.7711	9.71847	6.29088	13.9907	13.2248	14.2193	yes	0.00229676	9.26015	13.8116	0.576773	0.947566
Nrros	negative regulator of reactive oxygen species	0.718825	0.20853	0.266123	2.54694	2.07678	0.783904	yes	0.00122911	0.397826	1.80254	2.17982	0.94698
Col5a1	collagen, type V, alpha 1	0.116133	0.28537	0.12016	1.67642	0.684379	1.64374	yes	0.000658218	0.173888	1.33485	2.94045	0.945171
Tcirg1	T cell, immune regulator 1, ATPase, H+ transporting, lysosomal V0 protein A3	13.6348	16.2495	13.8073	19.9037	17.2756	23.2008	yes	0.0264624	14.5639	20.1267	0.466717	0.944475
Trio	triple functional domain (PTPRF interacting)	13.3563	15.0075	13.552	19.3565	17.5569	21.3322	yes	0.00375207	13.9719	19.4152	0.474655	0.942042
Ncf2	neutrophil cytosolic factor 2	8.77784	8.6259	8.97732	11.277	11.1782	17.1198	yes	0.0129405	8.79369	13.1917	0.585087	0.937965
Ptpn9	protein tyrosine phosphatase, non-receptor type 9	16.8842	14.6006	15.7486	21.2772	19.407	23.713	yes	0.0154745	15.7445	21.4657	0.447191	0.93791
Nexn	nexilin	3.06885	3.84515	1.81208	5.3257	6.5774	5.02996	yes	0.00691313	2.90869	5.64435	0.956437	0.935409
Calhm2	calcium homeostasis modulator family member 2	6.30516	4.19492	7.22893	9.86667	9.27679	9.62622	yes	0.0228552	5.90967	9.58989	0.698437	0.934791
Smtn	smoothelin	7.41146	8.45244	6.28387	12.8188	10.3861	11.1076	yes	0.00470227	7.38259	11.4375	0.631573	0.934696
Bean1	brain expressed, associated with Nedd4, 1	0.509682	0.575034	0.930689	2.2812	1.7776	2.76235	yes	0.000658218	0.671802	2.27372	1.75895	0.93338
Olfml3	olfactomedin-like 3	0.0367165	0.605039	0.173791	2.91571	1.29554	0.311822	yes	0.0203775	0.271849	1.50769	2.47146	0.926422
Rhd	Rh blood group, D antigen	0.343825	0.176544	0.202864	1.90461	1.08463	1.33669	yes	0.015118	0.241078	1.44198	2.58048	0.925673
Tnnt2	troponin T2, cardiac	1.08715	1.60869	0.357824	4.97503	1.59321	1.9253	yes	0.00691313	1.01789	2.83118	1.47582	0.924251
Wipf1	WAS/WASL interacting protein family, member 1	3.73527	3.56647	3.40642	6.59077	5.43971	7.45486	yes	0.000658218	3.56939	6.49511	0.863679	0.922227
Slc2a6	solute carrier family 2 (facilitated glucose transporter), member 6	8.11394	4.14053	8.80679	11.1951	11.6323	9.9532	yes	0.0264624	7.02042	10.9269	0.638251	0.92211
Shc2	SHC (Src homology 2 domain containing) transforming protein 2	0.119521	0.518117	1.09493	1.31456	1.61173	3.31303	yes	0.000658218	0.577523	2.07977	1.84848	0.921558
Acss1	acyl-CoA synthetase short-chain family member 1	16.2461	12.5668	19.1747	23.0949	22.8979	18.9487	yes	0.0197309	15.9959	21.6472	0.436479	0.921098
Plekha6	pleckstrin homology domain containing, family A member 6	1.50747	1.74167	2.09118	3.9902	3.89689	4.0857	yes	0.000658218	1.78011	3.99093	1.16476	0.920295
Dse	dermatan sulfate epimerase	3.31828	3.15397	3.44459	5.77059	6.67953	5.86758	yes	0.000658218	3.30561	6.1059	0.885286	0.912794
Serpine1	serine (or cysteine) peptidase inhibitor, clade E, member 1	0.716824	3.72022	0.63306	4.29568	4.30061	2.88424	yes	0.00608033	1.69003	3.82684	1.1791	0.909743
Ripk3	receptor-interacting serine-threonine kinase 3	6.89904	8.10047	5.97527	10.8156	9.75191	11.9285	yes	0.0320922	6.99159	10.832	0.631607	0.909662
Kcnk6	potassium inwardly-rectifying channel, subfamily K, member 6	1.0535	1.66197	1.08089	3.22291	2.49793	3.79552	yes	0.000658218	1.26545	3.17212	1.32579	0.905111
Chil1	chitinase-like 1	3.18235	5.09566	1.31435	2.14959	4.58433	11.0441	yes	0.0372052	3.19745	5.92601	0.890137	0.903343
Egflam	EGF-like, fibronectin type III and laminin G domains	1.62366	1.18616	0.997716	4.41959	3.42263	1.67641	yes	0.000658218	1.26918	3.17288	1.3219	0.903246
Prkag2	protein kinase, AMP-activated, gamma 2 non-catalytic subunit	6.35847	7.27891	8.88092	12.0913	11.9868	10.2019	yes	0.0254706	7.5061	11.4267	0.606269	0.901035
Bnip3	BCL2/adenovirus E1B interacting protein 3	5.10996	5.82398	7.03463	9.12605	11.2793	8.20828	yes	0.0477726	5.98952	9.53788	0.671227	0.900487
Aida	axin interactor, dorsalization associated	19.377	17.0542	18.5771	23.1477	23.9127	25.5404	yes	0.039271	18.3361	24.2003	0.400336	0.899137
Fnbp1	formin binding protein 1	6.09088	7.25185	5.72753	10.4258	9.95139	9.59953	yes	0.0140569	6.35675	9.99224	0.652518	0.899119
Prcp	prolylcarboxypeptidase (angiotensinase C)	3.11071	3.29151	3.78075	5.53505	7.14918	5.83185	yes	0.00326971	3.39432	6.17203	0.86262	0.898075
Vldlr	very low density lipoprotein receptor	4.39748	4.11965	3.36702	4.73274	5.94536	10.0948	yes	0.000658218	3.96138	6.9243	0.805664	0.898032
Kctd9	potassium channel tetramerisation domain containing 9	16.253	16.936	16.3614	21.5244	24.0572	20.7085	yes	0.0343175	16.5168	22.0967	0.419897	0.89796
Cnih4	cornichon family AMPA receptor auxiliary protein 4	11.9007	11.9688	13.4561	16.041	15.9042	20.0787	yes	0.0211095	12.4419	17.3413	0.479009	0.89776
Atp8b2	ATPase, class I, type 8B, member 2	4.12824	5.6046	4.42727	9.29144	7.40647	6.99624	yes	0.000658218	4.72004	7.89805	0.742698	0.894662
Myrip	myosin VIIA and Rab interacting protein	0.737806	0.0341577	0.0784588	4.35265	0.01	0.0349778	yes	0.00122911	0.283474	1.46588	2.37047	0.893978
Mcoln2	mucolipin 2	1.74703	1.98589	0.965271	5.27265	2.25676	3.26195	yes	0.00229676	1.56606	3.59712	1.1997	0.893847
Stk17b	serine/threonine kinase 17b (apoptosis-inducing)	8.66831	9.22562	7.51917	10.6109	13.5155	13.5583	yes	0.00936199	8.47103	12.5616	0.568407	0.891936
Fam43a	family with sequence similarity 43, member A	6.74238	9.71155	5.77942	6.90854	8.12232	18.7627	yes	0.0105984	7.41112	11.2645	0.604023	0.891675
Slc9a5	solute carrier family 9 (sodium/hydrogen exchanger), member 5	1.46296	2.09505	1.47929	4.07768	4.1993	2.97079	yes	0.000658218	1.6791	3.74926	1.15892	0.888524
Zfp618	zinc finger protein 618	1.11652	1.28214	0.903721	2.33257	3.2281	3.0508	yes	0.00122911	1.10079	2.87049	1.38275	0.888042
Ints12	integrator complex subunit 12	7.5262	6.19857	6.3181	10.2565	11.6811	9.08292	yes	0.0117625	6.68096	10.3402	0.630134	0.886939
Cars	cysteinyl-tRNA synthetase	16.8131	19.613	18.6205	25.1109	23.3885	23.8657	yes	0.0428191	18.3489	24.1217	0.394641	0.885819
Nxph3	neurexophilin 3	0.178483	0.491776	0.0470804	1.95376	1.27267	0.843258	yes	0.0158824	0.239113	1.35656	2.50419	0.884618
Ablim2	actin-binding LIM protein 2	0.0833068	0.117158	0.213531	1.07694	1.5329	0.776873	yes	0.000658218	0.137999	1.1289	3.0322	0.880361
Smoc2	SPARC related modular calcium binding 2	2.3705	3.75107	1.391	5.13983	4.77486	4.7601	yes	0.00563807	2.50419	4.8916	0.965961	0.877878
Akap13	A kinase (PRKA) anchor protein 13	12.2142	13.0667	9.95719	17.6462	16.1343	15.4139	yes	0.00375207	11.746	16.3981	0.481358	0.87691
Foxp2	forkhead box P2	1.17154	1.00356	1.25603	4.2657	2.78713	1.62244	yes	0.000658218	1.14371	2.89176	1.33822	0.870174
Slc38a6	solute carrier family 38, member 6	5.05138	5.77757	4.24078	8.85849	7.05993	8.61902	yes	0.010183	5.02324	8.17915	0.703331	0.868555
Lrrc73	leucine rich repeat containing 73	0.763939	0.456635	0.14993	2.28151	1.80927	1.14643	yes	0.0323909	0.456835	1.74574	1.93409	0.86847
Zfp862-ps	zinc finger protein 862, pseudogene	2.08622	1.5377	1.56024	3.79407	3.57553	3.91637	yes	0.000658218	1.72805	3.76199	1.12235	0.86806
Zcchc4	zinc finger, CCHC domain containing 4	4.67934	6.03708	3.94687	7.07934	8.09136	8.81308	yes	0.015118	4.88776	7.99459	0.70985	0.865605
Cpt1c	carnitine palmitoyltransferase 1c	1.90698	0.809401	1.92759	3.30586	2.36829	4.79911	yes	0.00375207	1.54799	3.49109	1.17328	0.865603
Adrbk2	Beta-adrenergic receptor kinase 2	0.0793108	0.208376	0.168921	1.70711	1.12287	0.56436	yes	0.000658218	0.152203	1.13145	2.8941	0.864306
Fam171a1	family with sequence similarity 171, member A1	9.64275	6.71009	10.3133	12.7844	12.3617	13.6282	yes	0.0073311	8.88871	12.9248	0.540092	0.864161
Lpcat4	lysophosphatidylcholine acyltransferase 4	2.21834	2.04942	2.61617	5.06599	4.41935	4.17391	yes	0.0271556	2.29464	4.55308	0.988574	0.863049
Tmeff2	transmembrane protein with EGF-like and two follistatin-like domains 2	0.339968	0.0495734	0.0854092	1.29279	0.583936	1.55063	yes	0.00470227	0.158317	1.14245	2.85125	0.862888
Clip1	CAP-GLY domain containing linker protein 1	20.3481	23.7073	18.6719	26.4187	27.5715	26.4849	yes	0.0463881	20.9091	26.825	0.359449	0.856266
Pcsk6	proprotein convertase subtilisin/kexin type 6	2.03095	3.41123	0.837405	4.15148	4.47341	4.11303	yes	0.000658218	2.0932	4.24597	1.02039	0.855034
Zfp365	zinc finger protein 365	1.30021	1.34382	0.749646	2.94818	2.2551	3.2843	yes	0.000658218	1.13123	2.82919	1.3225	0.853216
Sipa1l3	signal-induced proliferation-associated 1 like 3	10.8005	11.1722	11.2441	15.7542	13.4428	17.2018	yes	0.00563807	11.0723	15.4663	0.482174	0.852946
Lrrk2	leucine-rich repeat kinase 2	1.5491	1.96258	1.62896	4.10832	2.68273	4.25202	yes	0.000658218	1.71355	3.68102	1.10312	0.847093
Lrp8	low density lipoprotein receptor-related protein 8, apolipoprotein e receptor	8.09534	6.88061	8.00197	11.6731	13.4781	8.90411	yes	0.00177006	7.65931	11.3518	0.567632	0.846862
Ttc28	tetratricopeptide repeat domain 28	6.9168	6.28146	6.74317	11.4915	10.1969	8.64129	yes	0.000658218	6.64714	10.1099	0.604962	0.845908
Arl4c	ADP-ribosylation factor-like 4C	2.77221	2.79117	1.68598	3.46343	4.76746	5.76276	yes	0.00326971	2.41645	4.66455	0.948847	0.844827
Ovol2	ovo like zinc finger 2	1.17399	0.729278	1.31376	2.74065	2.33505	3.07268	yes	0.0339854	1.07234	2.71613	1.34078	0.844526
Rrad	Ras-related associated with diabetes	2.66853	1.68791	2.65064	4.0099	4.81581	4.81906	yes	0.0439838	2.33569	4.54826	0.961463	0.84329
Fsd1l	fibronectin type III and SPRY domain containing 1-like	2.67702	2.94223	2.51326	5.70524	4.92899	4.47637	yes	0.000658218	2.71084	5.03687	0.893788	0.835658
B230217C12Rik	RIKEN cDNA B230217C12 gene	0.572782	0.389577	0.447764	2.35184	1.4499	1.29199	yes	0.0423285	0.470041	1.69791	1.8529	0.833926
Ppm1f	protein phosphatase 1F (PP2C domain containing)	10.5714	10.7343	10.3049	16.2303	13.8613	14.0755	yes	0.0154745	10.5369	14.7224	0.482564	0.832793
Stbd1	starch binding domain 1	0.126238	0.217208	0.299449	1.35867	1.23154	1.02846	yes	0.00608033	0.214298	1.20622	2.4928	0.832252
Dusp16	dual specificity phosphatase 16	6.54274	8.24409	7.62097	10.7069	10.0332	12.4091	yes	0.00470227	7.46927	11.0497	0.564973	0.832014
Clip2	CAP-GLY domain containing linker protein 2	11.9619	10.5551	14.6627	18.6695	15.3182	16.6903	yes	0.0200754	12.3932	16.8927	0.446844	0.831435
Fam118a	family with sequence similarity 118, member A	6.85922	6.72524	7.45896	11.2539	9.94687	10.2776	yes	0.030694	7.01447	10.4928	0.580992	0.831304
Slc36a1	solute carrier family 36 (proton/amino acid symporter), member 1	14.2693	11.9964	16.8996	18.447	17.7602	21.4	yes	0.0257974	14.3884	19.2024	0.416377	0.830601
Tmem260	transmembrane protein 260	7.76773	6.3212	7.47365	11.2352	10.7728	10.0801	yes	0.00280352	7.18753	10.696	0.573509	0.829651
Hoxb2	homeobox B2	2.29039	1.84139	2.17801	2.64504	2.83818	7.03899	yes	0.0362507	2.10326	4.17407	0.988825	0.826517
Crlf1	cytokine receptor-like factor 1	2.84855	4.38928	1.5376	8.94744	3.54222	3.36767	yes	0.0480365	2.92514	5.28578	0.853608	0.823821
Pck2	phosphoenolpyruvate carboxykinase 2 (mitochondrial)	3.22932	1.89667	3.93802	5.72552	5.59504	4.88734	yes	0.00771655	3.02134	5.40263	0.838476	0.820456
Trp53inp1	transformation related protein 53 inducible nuclear protein 1	13.5961	12.3522	12.0066	21.9753	18.7829	10.6171	yes	0.0162666	12.6516	17.1251	0.436789	0.819796
Dgkd	diacylglycerol kinase, delta	19.1977	17.0268	20.2223	24.4582	24.4286	23.6844	yes	0.0480365	18.8156	24.1904	0.362505	0.819592
Adnp2	ADNP homeobox 2	4.72823	4.60871	4.28387	8.14158	6.54774	7.40254	yes	0.00424048	4.54027	7.36395	0.697702	0.8184
AI414108	immunoglobulin superfamily, member 9B	0.782605	0.719148	0.864336	2.26647	1.82636	2.51733	yes	0.000658218	0.788696	2.20339	1.48218	0.817852
Slc6a9	solute carrier family 6 (neurotransmitter transporter, glycine), member 9	2.4136	4.10262	1.91981	5.38813	5.57752	4.36377	yes	0.00771655	2.81201	5.10981	0.861667	0.816393
Inpp5b	inositol polyphosphate-5-phosphatase B	11.7006	10.7158	12.1407	16.5345	15.0039	15.8076	yes	0.0238731	11.519	15.782	0.45426	0.815873
Chst11	carbohydrate sulfotransferase 11	0.210853	0.0879277	0.25245	1.3661	1.057	0.914957	yes	0.000658218	0.183744	1.11269	2.59828	0.815857
Afap1	actin filament associated protein 1	4.2104	5.15269	5.83365	8.02786	7.40861	8.60316	yes	0.000658218	5.06558	8.01321	0.661653	0.815059
Arhgap17	Rho GTPase activating protein 17	15.694	12.6841	15.4899	20.9597	19.2376	17.8796	yes	0.0499961	14.6227	19.359	0.404796	0.812488
Snx18	sorting nexin 18	6.32829	6.54789	5.68756	9.5338	9.45946	9.16777	yes	0.00518114	6.18791	9.38701	0.601213	0.810615
Ggt7	gamma-glutamyltransferase 7	0.13994	0.12891	0.148079	1.39747	0.791333	0.827492	yes	0.006476	0.138976	1.00543	2.8549	0.809945
Tmem71	transmembrane protein 71	1.70799	1.05342	1.40622	2.83617	3.38557	3.09727	yes	0.006476	1.38921	3.10634	1.16095	0.809862
Fbn1	fibrillin 1	0.681457	2.35732	0.489665	3.37956	2.37878	2.59057	yes	0.000658218	1.17615	2.78297	1.24256	0.807549
Egr3	early growth response 3	7.2498	14.224	8.00882	11.5154	10.3719	19.3224	yes	0.0251741	9.82754	13.7366	0.483119	0.805273
Pla2g7	phospholipase A2, group VII (platelet-activating factor acetylhydrolase, plasma)	1.11713	1.89841	0.778948	4.09606	2.06857	2.55982	yes	0.0187083	1.26483	2.90815	1.20116	0.80445
Cobl	cordon-bleu WH2 repeat	2.69143	2.34638	4.02847	6.24257	5.41071	4.3801	yes	0.00177006	3.02209	5.34446	0.822496	0.802893
Prkca	protein kinase C, alpha	3.15515	3.04667	4.04709	6.26961	6.02976	5.2734	yes	0.000658218	3.4163	5.85759	0.777871	0.801655
Coro6	coronin 6	0.516227	0.211209	0.0809055	1.58586	1.23992	0.94714	yes	0.0144247	0.269447	1.25764	2.22264	0.799668
Emilin2	elastin microfibril interfacer 2	0.196691	0.125917	0.0482068	1.2972	0.588379	0.967793	yes	0.00177006	0.123605	0.951124	2.9439	0.798231
Slc1a5	solute carrier family 1 (neutral amino acid transporter), member 5	8.32915	4.28439	6.98064	7.59984	13.2797	8.3295	yes	0.0284584	6.53139	9.73635	0.57599	0.794617
March3	membrane-associated ring finger (C3HC4) 3	1.23379	0.946981	1.1453	2.46973	2.69776	2.77386	yes	0.0297204	1.10869	2.64712	1.25557	0.793826
Scml4	Scm polycomb group protein like 4	9.89899	8.45128	11.0055	16.2099	12.9986	11.6561	yes	0.0121266	9.78526	13.6215	0.477208	0.792938
Setd7	SET domain containing (lysine methyltransferase) 7	7.81598	9.16694	6.60923	11.8959	12.1244	9.98879	yes	0.00424048	7.86405	11.3364	0.527614	0.792435
Cyp26c1	cytochrome P450, family 26, subfamily c, polypeptide 1	0.540849	0.171007	0.916987	0.850636	1.83687	2.52977	yes	0.0310161	0.542948	1.73909	1.67945	0.791812
Lor	loricrin	2.85671	2.15859	1.29641	1.61997	9.35785	1.21329	yes	0.046119	2.1039	4.0637	0.949727	0.789139
E2f7	E2F transcription factor 7	1.54117	3.07294	1.59488	2.65878	4.99527	4.35501	yes	0.000658218	2.06966	4.00302	0.951693	0.784552
Abcg1	ATP binding cassette subfamily G member 1	0.548918	0.693831	0.749008	2.11386	1.42572	2.21533	yes	0.000658218	0.663919	1.9183	1.53075	0.780609
Adam23	a disintegrin and metallopeptidase domain 23	0.0843738	0.174307	0.0669567	0.307792	0.395151	1.94812	yes	0.0110021	0.108546	0.883688	3.02523	0.77817
3632451O06Rik	armadillo-like helical domain containing 4	0.970786	0.762608	1.3315	2.84254	2.16199	2.41157	yes	0.00936199	1.02163	2.47203	1.27482	0.775975
Pde4dip	phosphodiesterase 4D interacting protein (myomegalin)	6.75339	6.223	8.29428	11.3986	11.1363	8.44258	yes	0.00280352	7.09022	10.3258	0.542354	0.775319
Tmem136	transmembrane protein 136	0.629623	0.471651	0.460466	2.07427	1.58029	1.32987	yes	0.00177006	0.52058	1.66148	1.67427	0.772348
Wbscr27	methyltransferase like 27	1.98673	1.61262	2.05817	4.07518	2.8483	4.20002	yes	0.0166145	1.88584	3.70783	0.975369	0.770368
Col6a1	collagen, type VI, alpha 1	0.862155	1.54656	0.449987	4.10814	2.1443	0.802959	yes	0.000658218	0.952901	2.3518	1.30337	0.769521
Tnfaip8	tumor necrosis factor, alpha-induced protein 8	3.38228	4.44474	2.96561	6.74908	4.9178	6.21804	yes	0.0166145	3.59754	5.96164	0.728697	0.764636
Bbs9	Bardet-Biedl syndrome 9 (human)	10.6536	8.60409	8.76338	14.0024	13.7859	11.0627	yes	0.0402205	9.34036	12.9503	0.47144	0.764615
Sorbs2	sorbin and SH3 domain containing 2	0.285362	0.493962	0.628592	1.8933	1.33922	1.41775	yes	0.000658218	0.469305	1.55009	1.72375	0.760551
Cobll1	Cobl-like 1	12.9956	11.5551	9.35186	16.2275	15.335	13.9648	yes	0.0248438	11.3009	15.1758	0.425338	0.753062
Dok5	docking protein 5	0.179462	0.344494	0.0566513	0.771972	0.857561	1.42001	yes	0.0278271	0.193536	1.01651	2.39296	0.748147
Ece1	endothelin converting enzyme 1	8.99287	10.668	9.57663	14.4797	13.8031	11.736	yes	0.0274749	9.74583	13.3396	0.452858	0.747964
Tgfb3	transforming growth factor, beta 3	1.81626	1.44139	1.23465	3.46357	3.12065	2.70571	yes	0.00896147	1.49743	3.09664	1.04821	0.746116
Trove2	TROVE domain family, member 2	5.97762	4.45989	5.75257	10.1039	7.37815	6.92876	yes	0.00229676	5.39669	8.13694	0.59241	0.744873
Mypop	Myb-related transcription factor, partner of profilin	2.90744	2.12176	3.56594	4.8079	4.51814	5.49593	yes	0.0488229	2.86505	4.94066	0.786144	0.742916
Ccdc3	coiled-coil domain containing 3	2.21889	3.12987	2.14262	5.99896	4.3114	3.05185	yes	0.0297204	2.49713	4.45407	0.834855	0.742247
Tnfrsf22	tumor necrosis factor receptor superfamily, member 22	2.33254	1.83314	0.816558	4.23556	4.19552	1.50004	yes	0.0409964	1.66075	3.31037	0.995162	0.739876
Nacc2	nucleus accumbens associated 2, BEN and BTB (POZ) domain containing	6.58259	4.58534	7.0235	10.1054	7.67657	8.97943	yes	0.00375207	6.06381	8.92047	0.556895	0.737972
Klhl29	kelch-like 29	0.106414	0.159473	0.0523252	0.866473	0.697247	0.873855	yes	0.000658218	0.106071	0.812525	2.93739	0.737092
Gabrb3	gamma-aminobutyric acid (GABA) A receptor, subunit beta 3	0.774566	0.6681	0.817325	1.97776	1.40104	2.51221	yes	0.00122911	0.75333	1.96367	1.3822	0.734281
Ngfr	nerve growth factor receptor (TNFR superfamily, member 16)	0.805814	1.21355	1.36598	1.81922	1.64896	4.13153	yes	0.00978581	1.12845	2.53324	1.16664	0.734126
Pomk	protein-O-mannose kinase	8.56852	8.69633	10.514	13.4518	12.2435	12.3875	yes	0.0402205	9.25962	12.6943	0.455153	0.733039
Tmod2	tropomodulin 2	1.93624	1.28028	2.2839	3.8767	3.79183	2.91371	yes	0.000658218	1.83347	3.52741	0.944031	0.73161
Ern1	endoplasmic reticulum (ER) to nucleus signalling 1	11.3269	10.1248	10.5155	13.7664	14.0405	15.1083	yes	0.0423285	10.6557	14.3051	0.424896	0.73044
Igf1r	insulin-like growth factor I receptor	5.6348	5.78596	6.37018	9.14834	7.94603	9.07569	yes	0.00122911	5.93031	8.72335	0.556774	0.729632
Spata13	spermatogenesis associated 13	1.13354	1.40721	0.72231	2.73366	2.16798	2.47495	yes	0.000658218	1.08769	2.45886	1.17673	0.728099
Gpd2	glycerol phosphate dehydrogenase 2, mitochondrial	8.99071	9.93813	8.77457	11.829	13.2505	12.8359	yes	0.0190475	9.23447	12.6385	0.45272	0.727839
Skil	SKI-like	7.87129	9.00983	9.35029	13.6539	11.4926	10.9709	yes	0.0113598	8.7438	12.0391	0.461399	0.722845
Pkib	protein kinase inhibitor beta, cAMP dependent, testis specific	2.82249	2.90311	2.46509	5.0717	5.33441	3.68321	yes	0.000658218	2.73023	4.69644	0.782545	0.721494
Lpgat1	lysophosphatidylglycerol acyltransferase 1	8.6909	8.74477	10.8639	12.1138	12.3038	14.0658	yes	0.015118	9.43319	12.8278	0.443456	0.719478
Clip3	CAP-GLY domain containing linker protein 3	0.326143	0.150583	0.144132	0.940981	0.682314	1.33849	yes	0.00691313	0.206953	0.987262	2.25413	0.714045
Tbc1d30	TBC1 domain family, member 30	1.94901	1.5747	2.03653	3.72497	3.86183	2.93279	yes	0.00280352	1.85341	3.50653	0.919859	0.714041
C030034L19Rik	RIKEN cDNA C030034L19 gene	0.0957097	0.21201	0.01	0.734966	0.528725	1.06032	yes	0.0154745	0.105907	0.77467	2.87079	0.712671
3110057O12Rik	abhydrolase domain containing 18	2.35592	2.23678	3.07554	4.0241	4.93542	4.35239	yes	0.0455783	2.55608	4.4373	0.79575	0.711372
Psd2	pleckstrin and Sec7 domain containing 2	0.839449	0.865432	0.371827	1.57733	1.88601	1.99028	yes	0.000658218	0.692236	1.81787	1.39292	0.710481
Rassf5	Ras association (RalGDS/AF-6) domain family member 5	2.52334	2.45213	2.3703	4.33189	4.06872	4.45648	yes	0.018354	2.44859	4.2857	0.807579	0.707927
Wfikkn2	WAP, follistatin/kazal, immunoglobulin, kunitz and netrin domain containing 2	0.0703793	0.195016	0.0839968	0.754739	0.9275	0.674944	yes	0.006476	0.116464	0.785728	2.75414	0.704608
Csgalnact2	chondroitin sulfate N-acetylgalactosaminyltransferase 2	8.387	7.12932	7.56847	11.1483	10.0757	10.9278	yes	0.0412604	7.69493	10.7173	0.477957	0.704352
Arntl	aryl hydrocarbon receptor nuclear translocator-like	4.02624	3.93372	5.4416	10.5041	5.08278	4.8899	yes	0.0404412	4.46719	6.82559	0.611588	0.701808
Scn5a	sodium channel, voltage-gated, type V, alpha	0.185396	0.231532	0.188333	0.920051	0.911842	1.03728	yes	0.000658218	0.201754	0.956391	2.24501	0.701224
Kcna6	potassium voltage-gated channel, shaker-related, subfamily, member 6	0.12926	0.442402	0.22228	0.6049	0.373787	2.23537	yes	0.000658218	0.264647	1.07135	2.01729	0.69793
Brsk2	BR serine/threonine kinase 2	0.466791	0.283447	0.279038	0.804706	1.38686	1.44343	yes	0.00177006	0.343092	1.21167	1.82032	0.696587
Sh3d19	SH3 domain protein D19	11.161	8.77294	11.2713	14.8575	14.8874	11.7363	yes	0.0281261	10.4017	13.8271	0.410669	0.695881
Pvt1	Pvt1 oncogene	4.14459	4.84393	3.13937	8.10327	8.19881	2.47109	yes	0.0372052	4.04263	6.25772	0.630344	0.690186
AI427809	expressed sequence AI427809	0.184358	0.211554	0.388874	0.904913	0.889469	1.35103	yes	0.0110021	0.261595	1.04847	2.00288	0.687479
Pfkfb3	6-phosphofructo-2-kinase/fructose-2,6-biphosphatase 3	4.60524	4.81761	3.92737	7.40579	6.94272	5.88912	yes	0.00853522	4.45007	6.74588	0.600177	0.686127
Tspyl4	TSPY-like 4	4.12653	2.48304	4.73699	4.56966	5.72851	7.43981	yes	0.0217648	3.78219	5.91266	0.644587	0.684236
Slc22a15	solute carrier family 22 (organic anion/cation transporter), member 15	3.94415	4.02152	4.22884	4.82447	6.55539	7.38548	yes	0.00229676	4.06484	6.25511	0.621839	0.681805
Srgap2	SLIT-ROBO Rho GTPase activating protein 2	9.52735	10.1498	9.49601	13.55	13.6323	11.7323	yes	0.0224979	9.72439	12.9715	0.41567	0.681598
Il17ra	interleukin 17 receptor A	6.13405	6.65042	5.6219	8.76687	8.3108	9.18523	yes	0.0353304	6.13546	8.7543	0.512821	0.678681
Ak4	adenylate kinase 4	1.3765	2.08014	1.27729	2.95073	3.59672	2.55404	yes	0.00608033	1.57798	3.03383	0.943064	0.677926
Knstrn	kinetochore-localized astrin/SPAG5 binding	3.85078	4.13152	2.66362	6.19697	5.24578	5.33251	yes	0.0448614	3.54864	5.59175	0.656034	0.675787
Cnnm4	cyclin M4	5.35178	5.13789	5.57412	8.40107	7.70558	7.3012	yes	0.0173238	5.3546	7.80262	0.54318	0.67489
Fam189b	family with sequence similarity 189, member B	4.38261	2.91065	4.68679	6.43704	6.29269	5.66589	yes	0.0491373	3.99335	6.13187	0.618728	0.672066
Creb5	cAMP responsive element binding protein 5	0.46259	2.41408	0.467724	2.42319	2.21843	2.44802	yes	0.0303892	1.1148	2.36321	1.08397	0.669412
Lax1	lymphocyte transmembrane adaptor 1	0.271485	0.107302	0.215085	0.846005	0.95656	0.885488	yes	0.00936199	0.197957	0.896018	2.17834	0.667405
Aff1	AF4/FMR2 family, member 1	11.5755	12.7564	12.0237	16.4326	15.1029	15.35	yes	0.0380618	12.1185	15.6285	0.366964	0.666338
Slc12a7	solute carrier family 12, member 7	8.41868	8.4729	10.7837	12.9754	13.2762	10.6808	yes	0.0439838	9.22509	12.3108	0.416289	0.664926
Rhobtb1	Rho-related BTB domain containing 1	0.560249	1.09595	0.564248	1.81145	1.85716	1.69092	yes	0.00280352	0.740149	1.78651	1.27126	0.658276
Hdgfrp3	HDGF like 3	3.1259	3.2048	2.70113	4.74745	5.08217	4.72938	yes	0.00771655	3.01061	4.853	0.688821	0.657008
Prkab2	protein kinase, AMP-activated, beta 2 non-catalytic subunit	6.37027	7.13444	6.69614	9.98893	10.7098	7.40696	yes	0.036577	6.73362	9.36856	0.476446	0.656643
Cbx4	chromobox 4	8.99017	8.92108	8.22145	10.334	12.2533	12.2939	yes	0.0423285	8.7109	11.6271	0.416593	0.646634
Ppm1h	protein phosphatase 1H (PP2C domain containing)	6.16138	5.4027	8.73195	9.45619	8.61281	10.0004	yes	0.0434278	6.76534	9.35647	0.467801	0.645329
Disp1	dispatched RND transporter family member 1	6.23835	5.30929	6.98716	8.10106	7.82554	10.0413	yes	0.0293935	6.17827	8.65597	0.486493	0.643304
Tnfrsf23	tumor necrosis factor receptor superfamily, member 23	0.291235	0.418485	0.295388	1.51407	0.845635	0.956735	yes	0.00424048	0.335036	1.10548	1.72228	0.641922
Slc19a2	solute carrier family 19 (thiamine transporter), member 2	3.46513	4.40029	3.74202	5.50765	6.13239	5.95604	yes	0.0428191	3.86915	5.86536	0.600204	0.639808
Ptpru	protein tyrosine phosphatase, receptor type, U	0.202005	0.162546	0.135754	1.05431	0.692929	0.605065	yes	0.00177006	0.166768	0.784101	2.23319	0.633081
Cnr1	cannabinoid receptor 1 (brain)	1.49999	0.806419	1.51692	2.64753	2.40595	2.46156	yes	0.00375207	1.27444	2.50501	0.974951	0.632983
Bmp4	bone morphogenetic protein 4	0.690799	1.03741	0.645575	1.17389	1.69957	2.536	yes	0.0469495	0.791261	1.80315	1.1883	0.628224
Neurl1a	neuralized E3 ubiquitin protein ligase 1A	0.467721	0.357881	0.694209	1.00788	1.45753	1.62749	yes	0.006476	0.506604	1.3643	1.42923	0.627058
Spred3	sprouty-related, EVH1 domain containing 3	0.451216	0.706808	0.579846	1.93728	1.31449	1.15875	yes	0.00978581	0.57929	1.47017	1.34363	0.622301
Zbtb21	zinc finger and BTB domain containing 21	3.8975	4.26459	3.99855	6.56164	5.80929	5.71756	yes	0.018354	4.05355	6.0295	0.572853	0.622272
Rnf152	ring finger protein 152	0.170697	0.503908	0.109176	1.09994	0.926633	0.797672	yes	0.000658218	0.26126	0.941415	1.84934	0.620202
Arrb1	arrestin, beta 1	5.29175	5.49984	5.71778	9.64333	7.07835	6.55543	yes	0.0144247	5.50312	7.75904	0.495627	0.619463
Mmp13	matrix metallopeptidase 13	1.02228	1.53855	0.72135	4.41662	0.8563	1.38646	yes	0.0407075	1.09406	2.21979	1.02073	0.618399
Abtb2	ankyrin repeat and BTB (POZ) domain containing 2	4.87925	5.20185	5.27624	7.98314	6.77972	7.12172	yes	0.0407075	5.11911	7.29486	0.510986	0.617523
Ttl	tubulin tyrosine ligase	6.64974	6.73301	6.83028	8.36732	9.3861	9.82226	yes	0.0482462	6.73768	9.19189	0.448111	0.614909
Nlrp10	NLR family, pyrin domain containing 10	0.930106	1.58234	0.56399	3.48585	1.62622	1.21085	yes	0.015118	1.02548	2.10764	1.03933	0.611369
Ndst3	N-deacetylase/N-sulfotransferase (heparan glucosaminyl) 3	2.74872	1.95494	2.78743	3.4824	4.1863	4.51916	yes	0.0117625	2.49703	4.06262	0.702197	0.611277
Thbs3	thrombospondin 3	0.527314	0.704075	0.449281	1.46733	1.65502	1.04325	yes	0.0231963	0.560223	1.38853	1.30949	0.593354
Nfatc4	nuclear factor of activated T cells, cytoplasmic, calcineurin dependent 4	0.38461	0.329757	0.145675	1.19943	1.0473	0.586918	yes	0.0125484	0.286681	0.944549	1.72018	0.592884
Rnf32	ring finger protein 32	0.204817	0.271351	0.360669	0.891704	0.810207	1.07253	yes	0.0463881	0.278946	0.924814	1.72918	0.588673
Cpm	carboxypeptidase M	0.303161	0.265243	0.412132	1.29069	0.562948	1.11807	yes	0.00229676	0.326845	0.990569	1.59965	0.578264
Tnfrsf11b	tumor necrosis factor receptor superfamily, member 11b (osteoprotegerin)	0.236177	0.267238	0.272858	1.47992	0.970914	0.152407	yes	0.0197309	0.258758	0.867747	1.74567	0.573777
Lig4	ligase IV, DNA, ATP-dependent	3.09472	3.06993	2.99584	5.08907	4.28069	4.56401	yes	0.0477726	3.0535	4.64459	0.605089	0.573461
Frmd5	FERM domain containing 5	2.48327	2.20012	2.7952	2.07276	2.8329	6.92155	yes	0.0415471	2.49286	3.9424	0.661272	0.571409
Dock9	dedicator of cytokinesis 9	5.76786	6.41537	4.39513	7.99275	8.50454	6.26068	yes	0.0261553	5.52612	7.58599	0.457071	0.568858
Psd3	pleckstrin and Sec7 domain containing 3	1.624	2.40322	1.64838	4.48106	3.10546	1.91933	yes	0.00122911	1.89187	3.16862	0.744043	0.567558
Rptn	repetin	0.270225	0.197355	0.135999	0.288731	1.08811	0.889674	yes	0.00518114	0.201193	0.755505	1.90886	0.566718
Dirc2	disrupted in renal carcinoma 2 (human)	0.670065	1.39559	1.17129	2.03395	1.71265	2.47382	yes	0.0235507	1.07898	2.07347	0.942379	0.560114
Mdn1	midasin AAA ATPase 1	4.93057	6.93899	4.14558	8.40618	6.97439	6.47706	yes	0.0113598	5.33838	7.28588	0.448701	0.548118
Pxdn	peroxidasin	0.209745	0.705179	0.153589	1.62404	0.84303	0.497525	yes	0.006476	0.356171	0.988198	1.47223	0.5451
Tbl1xr1	transducin (beta)-like 1X-linked receptor 1	1.53392	2.82458	2.07957	3.32632	3.05408	3.80409	yes	0.0117625	2.14602	3.39483	0.661674	0.530526
Col1a1	collagen, type I, alpha 1	0.174611	0.242496	0.358074	0.942043	0.64112	0.833676	yes	0.00853522	0.258394	0.805613	1.64052	0.530505
Peak1	pseudopodium-enriched atypical kinase 1	2.62413	2.11441	1.88756	4.12796	3.22645	3.04168	yes	0.00375207	2.2087	3.46536	0.649809	0.52756
Rnf169	ring finger protein 169	4.16498	4.95535	4.8152	6.22305	6.73066	6.21519	yes	0.0353304	4.64518	6.38963	0.46	0.525143
Dpysl5	dihydropyrimidinase-like 5	0.96566	0.517248	1.02101	1.19329	1.29799	2.48236	yes	0.0287716	0.834639	1.65788	0.990115	0.521444
Myrfl	myelin regulatory factor-like	0.578414	0.453753	0.521189	1.19756	1.37983	1.0132	yes	0.0431484	0.517785	1.19686	1.20883	0.518599
Plag1	pleiomorphic adenoma gene 1	0.708393	0.720222	0.786814	1.31204	1.47502	1.70903	yes	0.033379	0.738476	1.4987	1.02108	0.508264
Igsf9b	immunoglobulin superfamily, member 9B	0.611332	0.809153	0.708723	1.54349	1.24062	1.58033	yes	0.0448614	0.709736	1.45481	1.03548	0.506428
Wnt9a	wingless-type MMTV integration site family, member 9A	0.486379	0.399246	0.573213	0.955839	1.31147	1.10043	yes	0.0404412	0.486279	1.12258	1.20696	0.501653
Chl1	cell adhesion molecule L1-like	1.22451	2.10751	0.676237	2.89931	1.81245	2.10242	yes	0.0144247	1.33609	2.27139	0.765565	0.492439
Rbm47	RNA binding motif protein 47	0.978007	1.66669	0.737063	1.57332	1.41085	2.99403	yes	0.0458491	1.12725	1.99273	0.821937	0.489983
Myh10	myosin, heavy polypeptide 10, non-muscle	1.95833	1.36822	1.9611	3.28639	2.12871	2.96674	yes	0.0147786	1.76255	2.79395	0.66464	0.483181
Syt7	synaptotagmin VII	0.455678	0.325471	0.408223	0.68879	1.45306	0.654253	yes	0.00771655	0.396457	0.932034	1.23322	0.464668
Nav3	neuron navigator 3	1.84033	3.40558	1.21698	3.56142	2.74918	3.36695	yes	0.032708	2.1543	3.22585	0.582462	0.461973
Tshz2	teashirt zinc finger family member 2	0.308233	0.380693	0.12752	0.669042	0.772726	0.763238	yes	0.0180095	0.272149	0.735002	1.43335	0.461207
Dennd3	DENN/MADD domain containing 3	0.824896	0.962965	0.842605	1.67324	1.62667	1.42384	yes	0.0472422	0.876822	1.57458	0.844614	0.445656
Lrp1	low density lipoprotein receptor-related protein 1	2.43171	3.40677	2.07501	4.15427	2.9526	3.95834	yes	0.0180095	2.63783	3.6884	0.483645	0.41769
Akap6	A kinase (PRKA) anchor protein 6	0.283891	0.666985	0.240465	0.707842	0.606293	1.14946	yes	0.0173238	0.397114	0.821198	1.04818	0.384214
Igdcc4	immunoglobulin superfamily, DCC subclass, member 4	0.39984	0.271612	0.371338	0.733425	0.78064	0.688305	yes	0.0480365	0.347597	0.734123	1.07861	0.37164

## Sheet: Table 1d
Table 1d. Genes supporting pathway analysis terms related to cell adhesion, focal adhesion and the extracellular matrix.
GO_BP:	Gene	Log2(fold_change)	p_value	q_value		GO_MP:	Gene	Log2(fold_change)	p_value	q_value		KEGG pathway: ECM-receptor interactions	Gene	Log2(fold_change)	p_value	q_value		KEGG pathway: Focal adhesions	Gene	Log2(fold_change)	p_value	q_value
Cell adhesion						extracellular matrix structural constituent						Col4a1	collagen, type IV, alpha 1(Col4a1)	3.50241	5e-05	0.000658		Col4a1	collagen, type IV, alpha 1(Col4a1)	3.50241	5e-05	0.000658
[truncated: 22 more rows]

## Sheet: Table 1e
Table 1e. Genes supporting pathway analysis terms related to axon guidance, nervous system development, and axon cellular component.
[truncated: 19 more rows]
